# Supplementary material for: Catalytic [4 + 1]-annulation of thioamides with carbenoid precursors
Source: Royal Society of Chemistry journal article supplement (doi:10.1039/d3qo02025h), 2024-01-01
Supplement: d3qo02025h1.pdf [file d3qo02025h1.pdf]

## *Electronic supplementary information*

### **Catalytic [4+1]-annulation of thioamides with carbenoid precursors**

Vladimir G. Ilkin,<sup>\*a</sup> Valeriy O. Filimonov,<sup>b</sup> Irina A. Utepova,<sup>c</sup> Tetyana V. Beryozkina,<sup>a</sup> Pavel A. Slepukhin,<sup>c,d</sup> Andrey A. Tumashov,<sup>c,d</sup> Wim Dehaen,<sup>\*e</sup> Vasiliy A. Bakulev<sup>\*a</sup>

- 
- a V.G. Ilkin, T.V. Beryozkina, V.A. Bakulev  
TOS Department  
Ural Federal University  
19 Mira st., Yekaterinbug 620002, Russia  
E-mail: v.g.ilkin@urfu.ru, v.a.bakulev@urfu.ru
- b V.O. Filimonov  
Department of Organic Chemistry  
Perm State University  
15 Bukireva st., Perm 614990, Russia
- c I.A. Utepova, P.A. Slepukhin  
Department of Organic & Biomolecular Chemistry  
Ural Federal University  
19 Mira st., Yekaterinbug 620002, Russia
- d P.A. Slepukhin  
Postovsky Institute of Organic Synthesis  
Ural Branch of Russian Academy of Sciences  
S. Kovalevskoy St. 22/20, Yekaterinburg 620108, Russia
- c W. Dehaen  
Sustainable Chemistry for Metals and Molecules, Department of Chemistry  
KU Leuven  
Celestijnenlaan 200F, Leuven B-3001, Belgium  
E-mail: wim.dehaen@kuleuven.be

## Table of Contents

|                                                                                                                                                      |           |
|------------------------------------------------------------------------------------------------------------------------------------------------------|-----------|
| General information .....                                                                                                                            | 3         |
| Preparation of starting reagents.....                                                                                                                | 4         |
| Starting compounds were used in the research .....                                                                                                   | 5         |
| Chiral rhodium(II) catalysts were used in the research.....                                                                                          | 6         |
| Synthesis of thioamides <b>1a-p</b> .....                                                                                                            | 7         |
| General procedure for the synthesis of thioamides <b>1a-d</b> .....                                                                                  | 7         |
| General procedure for the synthesis of thioamides <b>1h-s</b> .....                                                                                  | 11        |
| Synthesis of 1-Sulfonyl-1,2,3-Triazole <b>2g</b> and Diazo Compounds <b>2p,s-v</b> .....                                                             | 20        |
| Synthesis of catalysts Rh <sub>2</sub> ( <i>S</i> -DBPTTL) <sub>4</sub> and Rh <sub>2</sub> ( <i>S</i> -PTTR) <sub>4</sub> .....                     | 22        |
| Optimization study for the reaction of thioamide <b>1a</b> with 1-sulfonyl-1,2,3-triazole <b>2a</b> .....                                            | <b>25</b> |
| Synthesis of dihydrothiophenes <b>3</b> .....                                                                                                        | 25        |
| The reaction of 3-amino-2-cyanothioacrylamide <b>1r</b> with 1-sulfonyl-1,2,3-triazole <b>2a</b> afforded <i>N</i> -sulfonylamidine <b>3ta</b> ..... | 36        |
| The failure of experiments for the synthesis of dihydrothiophenes .....                                                                              | 37        |
| Optimization study for the reaction of thioamide <b>1a</b> with diazo compound <b>2h</b> .....                                                       | 39        |
| General procedure for the synthesis of dihydrothiophenes <b>4a,i-l</b> and <b>4'a,i-l</b> .....                                                      | 40        |
| General procedure for the synthesis of dihydrothiophenes <b>4a,m-o</b> and <b>4'a,m-o</b> .....                                                      | 47        |
| General procedure for the synthesis of dihydrothiophenes <b>5</b> .....                                                                              | 51        |
| General procedure for the synthesis of dihydrothiophenes <b>6</b> .....                                                                              | 65        |
| Asymmetric Synthesis of Dihydrithiophenes <b>5</b> .....                                                                                             | 67        |
| Gram-scale synthesis of dihydrithiophenes <b>5jh</b> .....                                                                                           | 71        |
| X-Ray crystallographic data.....                                                                                                                     | 72        |
| References .....                                                                                                                                     | 79        |
| NMR <sup>1</sup> H, <sup>13</sup> C and <sup>19</sup> F Spectra.....                                                                                 | 82        |

## General information

All chemicals were obtained from commercial sources and were used without further purification. Dry solvents were obtained according to the literature protocols and stored over molecular sieves. Analytical thin-layer chromatography was performed on aluminum foil plates coated with 0.2 mm silica gel. Column chromatography was performed using 60–120 mesh silica gel. Melting points were determined on a melting point apparatus Stuart SMP10 and are uncorrected. Enantioselectivity was determined on an Azura P6.1L Knauer HPLC using a Chiralpak AD column (250 × 4.6 mm, 5 μm) (Daicel, Japan). The elution rate for the Chiralpak AD column was 1 mL min<sup>-1</sup>. Detection was carried out on a wavelength of 220 (230) nm (Diode Array Detector). Optical rotation was measured using a PerkinElmer polarimeter 343 plus. IR spectra were recorded on a Bruker Alpha FT-IR spectrometer equipped with a ZnSe ATR accessory. All NMR spectra were recorded at 400 MHz, 600 MHz (<sup>1</sup>H NMR) and 100 MHz, 150 MHz (<sup>13</sup>C NMR) in CDCl<sub>3</sub>, DMSO-*d*<sub>6</sub>, CD<sub>3</sub>CN-*d*<sub>3</sub>. The chemical shifts are given in parts per million (ppm) relative to the resonance of the solvents [<sup>1</sup>H: δ (CHCl<sub>3</sub>) = 7.26, <sup>13</sup>C: δ (CDCl<sub>3</sub>) = 77.16 ppm; <sup>1</sup>H: δ (DMSO-*d*<sub>6</sub>) = 2.50, <sup>13</sup>C: δ (DMSO-*d*<sub>6</sub>) = 39.52 ppm; <sup>1</sup>H: δ (CD<sub>3</sub>CN-*d*<sub>3</sub>) = 1.94, <sup>13</sup>C: δ (CD<sub>3</sub>CN-*d*<sub>3</sub>) = 1.32, 118.26 ppm]. Multiplicities were given as: s (singlet), d (doublet), t (triplet), q (quartet), dd (double of doublet), and m (multiplet). Coupling constants are reported as *J* value in Hertz (Hz). The minor isomer (*Z/E*-isomerism) signal is highlighted with an asterisk (\*). High-resolution mass spectra (HRMS) were recorded using an ultra-high-resolution quadrupole time-of-flight mass spectrometer with an electrospray ionization probe installed coupled with an Agilent 1260 HPLC system. The XRD analysis was carried out using equipment of the Center for Joint Use “Spectroscopy and Analysis of Organic Compounds” at the Postovsky Institute of Organic Synthesis of the Russian Academy of Sciences (Ural Branch). The experiments were accomplished on the automated X-ray diffractometer «Xcalibur 3» with CCD detector on standard procedure (MoKα-irradiation, graphite monochromator, ω-scans with 1° step at T = 295(2) K). Empirical absorption correction was applied. The solution and refinement of the structures were accomplished with using Olex program package.<sup>1</sup> The structures were solved by method of the intrinsic phases in ShelXT program and refined by ShelXL by full-matrix least-squared method for non-hydrogen atoms.<sup>2</sup> The H-atoms were placed in the calculated positions and were refined in isotropic approximation. The XRD data were deposited in the Cambridge Structural Database with numbers CCDC 2288489–2288498. This data can be requested free of charge via [www.ccdc.cam.ac.uk](http://www.ccdc.cam.ac.uk).

## Preparation of starting reagents

3-Morpholino-3-thioxopropanenitrile (**S1a**),<sup>3</sup> 3-(piperidin-1-yl)-3-thioxopropanenitrile (**S1b**),<sup>4</sup> 3-(pyrrolidin-1-yl)-3-thioxopropanenitrile (**S1c**),<sup>4</sup> 3-(azepan-1-yl)-3-thioxopropanenitrile (**S1d**),<sup>5</sup> 2-cyano-*N*-(*p*-tolyl)ethanethioamide (**S1e**),<sup>6</sup> 4-morpholino-4-thioxobutan-2-one<sup>7</sup> (**S1f**), methyl 3-morpholino-3-thioxopropanoate<sup>8</sup> (**S1g**), 3-((4-chlorophenyl)amino)-2-(pyrrolidine-1-carbonothioyl)acrylonitrile<sup>9</sup> (**1t**), 2-morpholino-*N*-phenyl-2-thioxoacetohydrazoneyl cyanide<sup>10</sup> (**1u**), 3-(dimethylamino)-2-(pyrrolidine-1-carbonothioyl)acrylonitrile<sup>9</sup> (**1v**), 1-sulfonyl-1,2,3-triazoles **2a-c**,<sup>11</sup> **2d**,<sup>12</sup> **2e-f**,<sup>13</sup> diazo compounds **2h-o**,<sup>14</sup> **2q**,<sup>15</sup> **2r**,<sup>16</sup> **2t**,<sup>17</sup> **2v**,<sup>18</sup> 4,7-dibromoisobenzofuran-1,3-dione<sup>19</sup> (**S3**) were synthesized according to literature procedures. 3-Morpholino-3-thioxopropanethioamide<sup>20</sup> (**1e**), 4-cyclopropyl-1-tosyl-1*H*-1,2,3-triazole<sup>21</sup> (**2g**), *N*-(4-chlorophenyl)-*N'*-tosylformimidamide<sup>22</sup> (**3ta**) were synthesized according to modified literature procedures. 3-Diazo-7-methylindolin-2-one (**2p**) was purchased from commercial source and characterized. Copper, ruthenium, silver, palladium catalysts, Rh<sub>2</sub>(OAc)<sub>4</sub>, Rh<sub>2</sub>(Oct)<sub>4</sub>, Rh<sub>2</sub>(esp)<sub>2</sub>, Rh<sub>2</sub>(*S*-PTAD)<sub>4</sub>, Rh<sub>2</sub>(*S*-DOSP)<sub>4</sub> were purchased from commercial sources. Rh<sub>2</sub>(Piv)<sub>4</sub> was synthesized according to literature procedure.<sup>23</sup> Other chiral rhodium catalysts, Rh<sub>2</sub>(*S*-PTTL)<sub>4</sub>,<sup>24</sup> Rh<sub>2</sub>(*S*-PTV)<sub>4</sub>,<sup>24</sup> Rh<sub>2</sub>(*S*-NTTL)<sub>4</sub>,<sup>25</sup> were synthesized according to literature protocols. Heteroaromatic thioamides **T1-2**,<sup>26</sup> **T3**<sup>14</sup> were synthesized according to literature procedures.

## Starting compounds were used in the research

### Thioamides

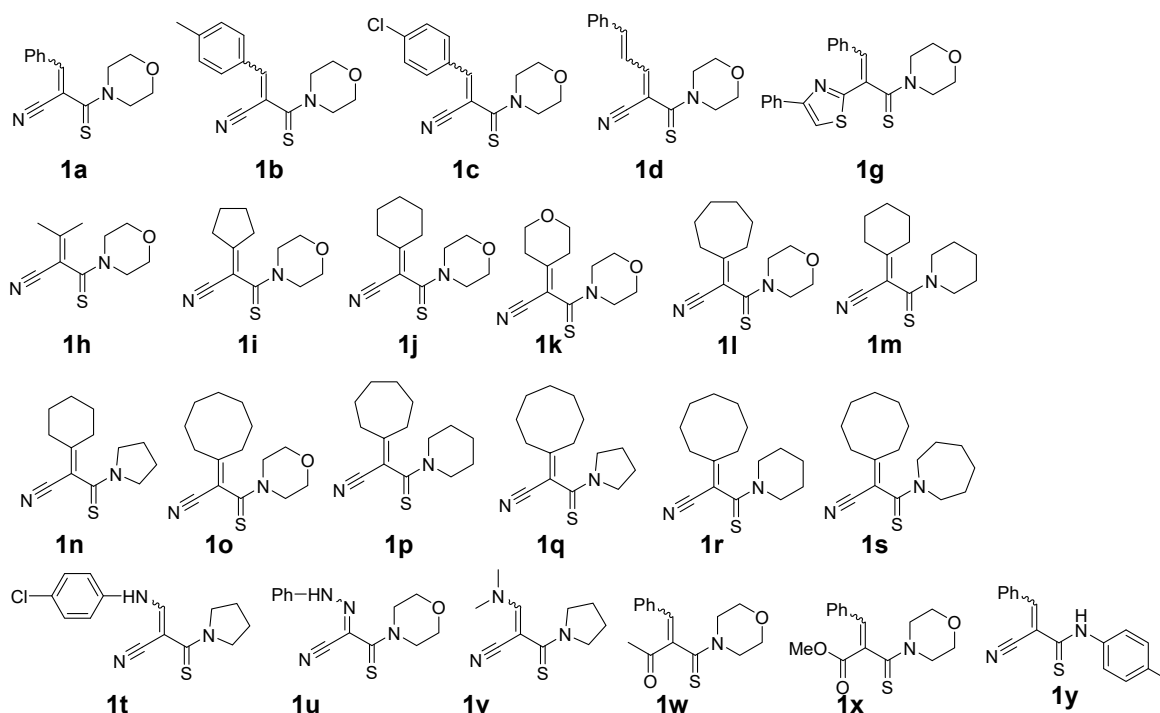

### Amide

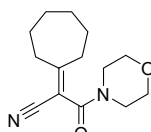

Am1

### 1-Sulfonyl-1,2,3-triazoles

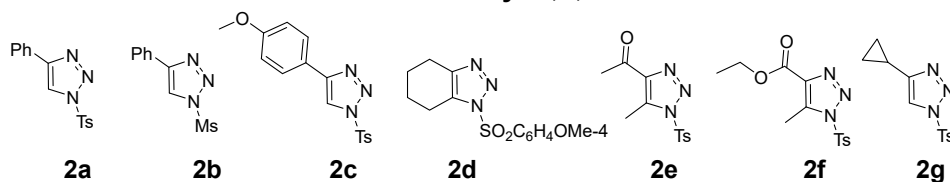

### Diazocompounds

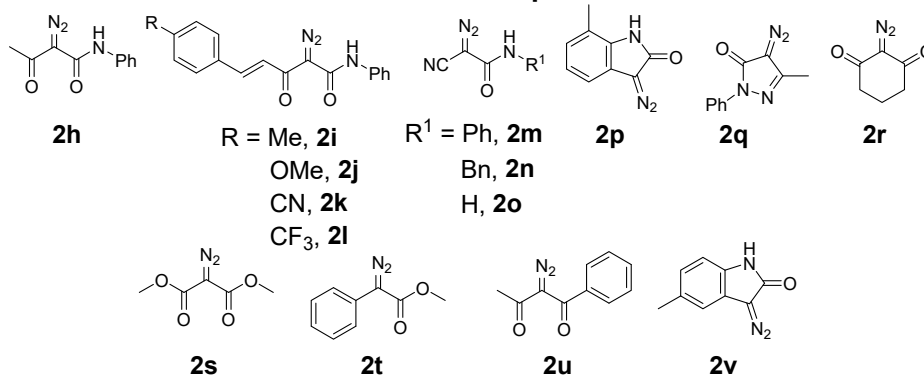

Figure S1. Starting compounds were used in the research

## Chiral rhodium(II) catalysts were used in the research

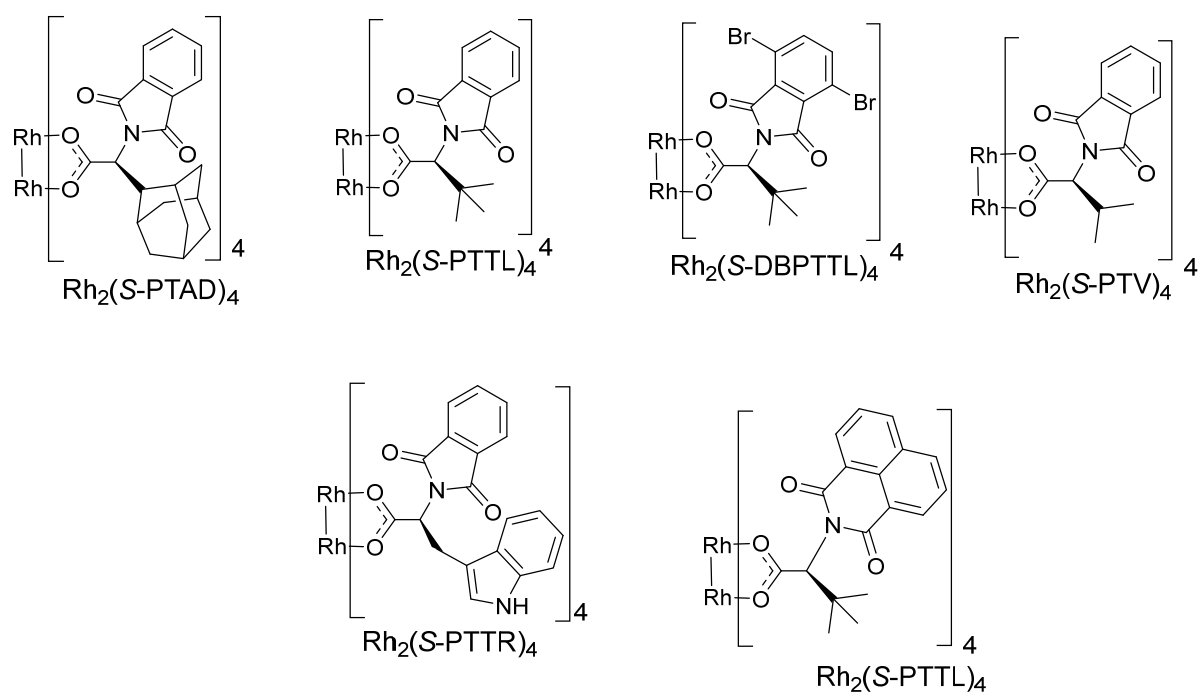

**Figure S2.** Chiral catalysts were used in the research

## Synthesis of thioamides 1a-p

### General procedure for the synthesis of thioamides 1a-d

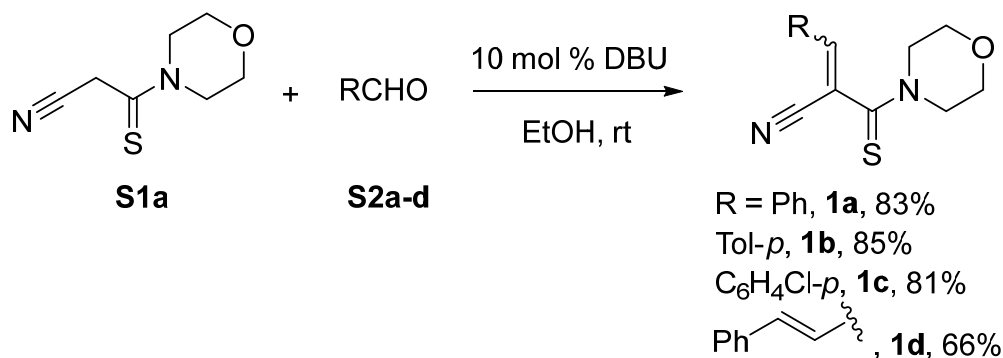

A mixture of 3-morpholino-3-thioxopropanenitrile (**S1a**) (1.0 equiv), appropriate aldehyde **S2a-d** (1.3–1.4 equiv) and DBU (0.1 equiv) in ethanol (2–5 mL) was stirred for 10–18 h at room temperature. The formed precipitate was filtered off and washed with cold ethanol and diethyl ether for **1a-b** or with cold ethanol with subsequent centrifugation with hexane for **1d**. The product **1c** after filtration was washed with ethanol and diethyl ether, the precipitate was dissolved in boiling methanol and filtered off. The mother liquor was evaporated under reduced pressure.

### 2-(Morpholine-4-carbonothioyl)-3-phenylacrylonitrile (**1a**)

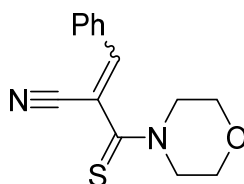

Compound **1a** was obtained according to the general procedure from 3-morpholino-3-thioxopropanenitrile (**S1a**) (1000 mg, 1.0 equiv, 5.87 mmol), benzaldehyde **S2a** (872 mg, 8.22 mmol, 1.4 equiv), DBU (89 mg, 0.1 equiv, 0.59 mmol), and ethanol (5 mL), reaction time is 15 h. Product **1a** was isolated as a yellow powder (1255 mg, 83%), mp 118–120 °C. <sup>1</sup>H NMR (400 MHz, DMSO-*d*<sub>6</sub>): δ 7.89 – 7.87 (m, 2H), 7.55 – 7.52 (m, 4H), 4.23 (br. s, 2H), 3.96 (br. s, 2H), 3.78 (br. s, 2H), 3.70 (br. s, 2H). <sup>13</sup>C{<sup>1</sup>H} NMR (150 MHz, DMSO-*d*<sub>6</sub>): δ 189.2, 144.7, 132.3, 131.6, 129.3, 129.1, 116.2, 110.8, 65.9, 65.5, 52.7, 49.6. HRMS (ESI) *m/z*: [M + Na]<sup>+</sup> calcd. for C<sub>14</sub>H<sub>14</sub>N<sub>2</sub>OSNa<sup>+</sup> 281.0719; found 281.0719.

### (*Z/E*)-2-(Morpholine-4-carbonothioyl)-3-(*p*-tolyl)acrylonitrile (**1b**)

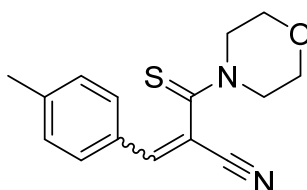

Compound **1b** was obtained according to the general procedure from 3-morpholino-3-thioxopropanenitrile (**S1a**) (600 mg, 1.0 equiv, 3.52 mmol), 4-methylbenzaldehyde (**S2b**) (593 mg, 4.93 mmol, 1.4 equiv), DBU (54 mg, 0.1 equiv, 0.35 mmol), and ethanol (5 mL), reaction time is 18 h. Product **1b** was isolated as a bright-yellow powder (815 mg, 85%), mp 160–162 °C. <sup>1</sup>H NMR (400 MHz, DMSO-*d*<sub>6</sub>): δ 7.42 (s, 1H), 7.39 (d, *J* = 4.2 Hz, 2H), 7.29 (d, *J* = 8.0 Hz, 2H), 4.28 – 4.16 (m, 2H), 3.80 – 3.72 (m, 2H), 3.68 – 3.62 (m, 1H), 3.52 – 3.47 (m, 2H), 3.08 – 3.02 (m, 1H), 2.34 (s, 3H). <sup>13</sup>C {<sup>1</sup>H} NMR (100 MHz, DMSO-*d*<sub>6</sub>): δ 189.6\*, 187.5, 144.9, 142.0\*, 141.4, 140.9, 129.7, 129.7, 129.5\*, 129.4\*, 117.4, 116.3\*, 110.5, 109.7\*, 65.8\*, 65.5\*, 65.2, 64.9, 52.7\*, 51.4, 49.6\*, 48.3, 21.1\*, 21.1. HRMS (ESI) *m/z*: [M + Na]<sup>+</sup> calcd. for C<sub>15</sub>H<sub>16</sub>N<sub>2</sub>OSNa<sup>+</sup> 295.0876; found 295.0876.

**(Z/E)-3-(4-Chlorophenyl)-2-(morpholine-4-carbonothioyl)acrylonitrile (1c)**

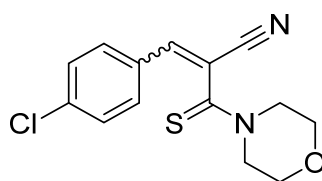

Compound **1c** was obtained according to the general procedure from 3-morpholino-3-thioxopropanenitrile (**S1a**) (1000 mg, 1.0 equiv, 5.87 mmol), 4-chlorobenzaldehyde (**S2c**) (1073 mg, 7.64 mmol, 1.3 equiv), DBU (89 mg, 0.1 equiv, 0.59 mmol), and ethanol (5 mL), reaction time is 14 h. Product **1c** was isolated as a yellow powder (1390 mg, 81%), mp 194–196 °C. <sup>1</sup>H NMR (400 MHz, DMSO-*d*<sub>6</sub>): δ 7.58 – 7.50 (m, 4H), 7.45 (s, 1H), 4.26 – 4.16 (m, 2H), 3.81 – 3.65 (m, 3H), 3.54 – 3.49 (m, 2H), 3.08 – 3.04 (m, 1H). <sup>13</sup>C {<sup>1</sup>H} NMR (100 MHz, DMSO-*d*<sub>6</sub>): δ 188.9\*, 186.8, 143.2, 139.6, 136.1\*, 135.7, 131.3, 131.3, 131.2\*, 131.0\*, 129.3, 129.2\*, 117.0, 115.9\*, 112.0, 111.3\*, 65.3, 64.9, 51.5, 48.3. HRMS (ESI) *m/z*: [M + Na]<sup>+</sup> calcd. for C<sub>14</sub>H<sub>13</sub>ClN<sub>2</sub>OSNa<sup>+</sup> 315.0329; found 315.0327.

**(Z/E)-2-(Morpholine-4-carbonothioyl)-5-phenylpenta-2,4-dienitrile (1d)**

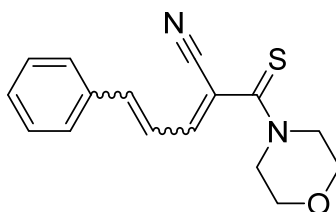

Compound **1d** was obtained according to the general procedure from 3-morpholino-3-thioxopropanenitrile (**S1a**) (200 mg, 1.0 equiv, 1.17 mmol), 3-phenylacrylaldehyde (**S2d**) (217 mg, 1.64 mmol, 1.4 equiv), DBU (18 mg, 0.1 equiv, 0.12 mmol), and ethanol (2 mL), reaction time is 10 h. Product **1d** was isolated as a yellow powder (220 mg, 66%), mp 139–141 °C. <sup>1</sup>H



NMR (400 MHz, DMSO-*d*<sub>6</sub>):  $\delta$  7.65 (d, *J* = 7.6 Hz, 2H), 7.47 – 7.34 (m, 5H), 7.15 – 7.09 (m, 1H), 4.32\* and 4.20 (both br. s, 2H), 3.91 and 3.81\* (both br. s, 2H), 3.73 and 3.64 – 3.61\* (br. s and m, 4H). <sup>13</sup>C{<sup>1</sup>H} NMR (100 MHz, DMSO-*d*<sub>6</sub>):  $\delta$  188.9, 186.5\*, 146.3, 144.9, 143.7\*, 142.1\*, 135.1, 135.0\*, 130.2, 130.1\*, 129.1, 129.0\*, 128.0\*, 127.9, 123.2, 121.9\*, 117.4\*, 115.26, 111.9, 110.8\*, 66.0, 65.8\*, 65.7\*, 65.6, 52.8\*, 52.0, 49.7\*, 48.6. HRMS (ESI) *m/z*: [M + H]<sup>+</sup> calcd. for C<sub>16</sub>H<sub>17</sub>N<sub>2</sub>OS<sup>+</sup> 285.1056; found 285.1056.

### 3-Morpholino-3-thioxopropanethioamide (1e)

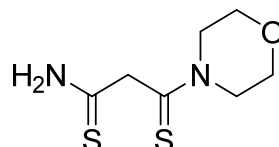

Sodium (40 mg, 0.1 equiv, 1.76 mmol) was dissolved in dry ethanol (35 mL), and the solution was cooled to 0 °C. Then the solution was saturated with hydrogen sulfide obtained from sodium sulfide nonahydrate (50 g) and phosphoric acid (15 mL). The hydrogen sulfide-saturated solution was transferred to an autoclave containing 3-morpholino-3-thioxopropanenitrile (**S1a**) (3000 mg, 1.0 equiv, 17.62 mmol) and stirred at 70 °C for 5 h. The formed suspension was cooled to room temperature and kept in the fridge for 1 h. Filtration of the precipitate and washing with ethanol afforded **1e** in 83% (3000 mg) yield as a colorless powder, mp 167–170 °C (lit.<sup>20</sup> 143–150 °C). <sup>1</sup>H NMR (400 MHz, DMSO-*d*<sub>6</sub>):  $\delta$  9.59 (s, 1H, NH), 9.18 (s, 1H, NH), 4.20 – 4.17 (m, 4H), 3.84 (br. s, 2H), 3.72 – 3.66 (m, 4H). <sup>13</sup>C{<sup>1</sup>H} NMR (100 MHz, DMSO-*d*<sub>6</sub>):  $\delta$  200.0, 194.3, 65.9, 65.5, 56.7, 51.2, 49.7.

### (*Z/E*)-2-(Morpholine-4-carbonothioyl)-3-phenylprop-2-enethioamide (1f)

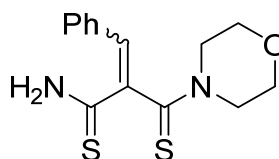

3-Morpholino-3-thioxopropanethioamide (**1e**) (680 mg, 1.0 equiv, 3.33 mmol), benzaldehyde (**S2a**) (494 mg, 1.4 equiv, 4.66 mmol) and DIPEA (43 mg, 0.1 equiv, 0.33 mmol) were dissolved in *n*-butanol (4 mL), and the solution was stirred at 100 °C for 13.5 h. The solvent was evaporated, and the residue was purified by column chromatography on SiO<sub>2</sub> (PE/EtOAc, gradient 50:0 to 25:25) afforded **1f** (33%, 321 mg) as pale-yellow powder, mp 118–120 °C. <sup>1</sup>H NMR (400 MHz, DMSO-*d*<sub>6</sub>):  $\delta$  9.79 (s, 1H, NH), 9.42 (s, 1H, NH), 7.54 (d, *J* = 7.2 Hz, 2H), 7.43 – 7.35 (m, 3H), 6.86 (s, 1H), 4.24 – 4.14 (m, 2H), 3.73 – 3.61 (m, 2H), 3.58 – 3.51 (m, 2H), 3.31 – 3.27 (m, 1H), 2.87 – 2.82 (m, 1H). <sup>13</sup>C{<sup>1</sup>H} NMR (100 MHz, DMSO-*d*<sub>6</sub>):  $\delta$  197.0, 196.9\*, 193.6, 139.1, 139.1\*,

133.9, 129.4, 129.2, 128.8\*, 128.7, 125.4, 65.0, 64.8, 51.5, 47.6. HRMS (ESI)  $m/z$ :  $[M - H]^-$  calcd. for  $C_{14}H_{15}N_2OS_2^-$  291.0631; found 291.0628.

### 1-Morpholino-3-phenyl-2-(4-phenylthiazol-2-yl)prop-2-ene-1-thione (**1g**)

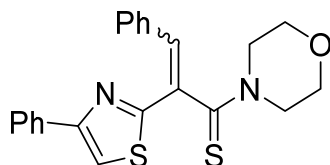

A mixture of 2-(morpholine-4-carbonothioyl)-3-phenylprop-2-enethioamide (**1f**) (100 mg, 1.0 equiv, 0.34 mmol) and freshly prepared 2-bromo-1-phenylethan-1-one (102 mg, 1.5 equiv, 0.51 mmol) in dry ethanol (2 mL) was stirred at room temperature for 3 h. The solvent was evaporated, and the residue was purified by column chromatography on  $SiO_2$  (PE/EtOAc, gradient 50:0 to 40:10). The obtained precipitate was centrifugated with diethyl ether to afford **1g** (71 mg, 53%) as a pale-yellow powder, mp 167–168 °C.  $^1H$  NMR (400 MHz,  $CDCl_3-d$ ):  $\delta$  7.94 (d,  $J = 7.6$  Hz, 2H), 7.64 (d,  $J = 7.3$  Hz, 2H), 7.48 – 7.31 (m, 8H), 4.59 – 4.54 (m, 1H), 4.35 – 4.29 (m, 1H), 3.89 – 3.74 (m, 3H), 3.63 – 3.50 (m, 2H), 3.23 – 3.19 (m, 1H).  $^{13}C\{^1H\}$  NMR (100 MHz,  $CDCl_3-d$ ):  $\delta$  195.4, 165.6, 156.2, 134.4, 134.4, 134.0, 129.7, 129.2, 129.0, 128.9, 128.5, 126.9, 126.6, 113.9, 66.3, 66.1, 51.6, 48.3. HRMS (ESI)  $m/z$ :  $[M + H]^+$  calcd. for  $C_{22}H_{21}N_2OS_2^+$  393.1090; found 393.1095.

## General procedure for the synthesis of thioamides **1h-s**

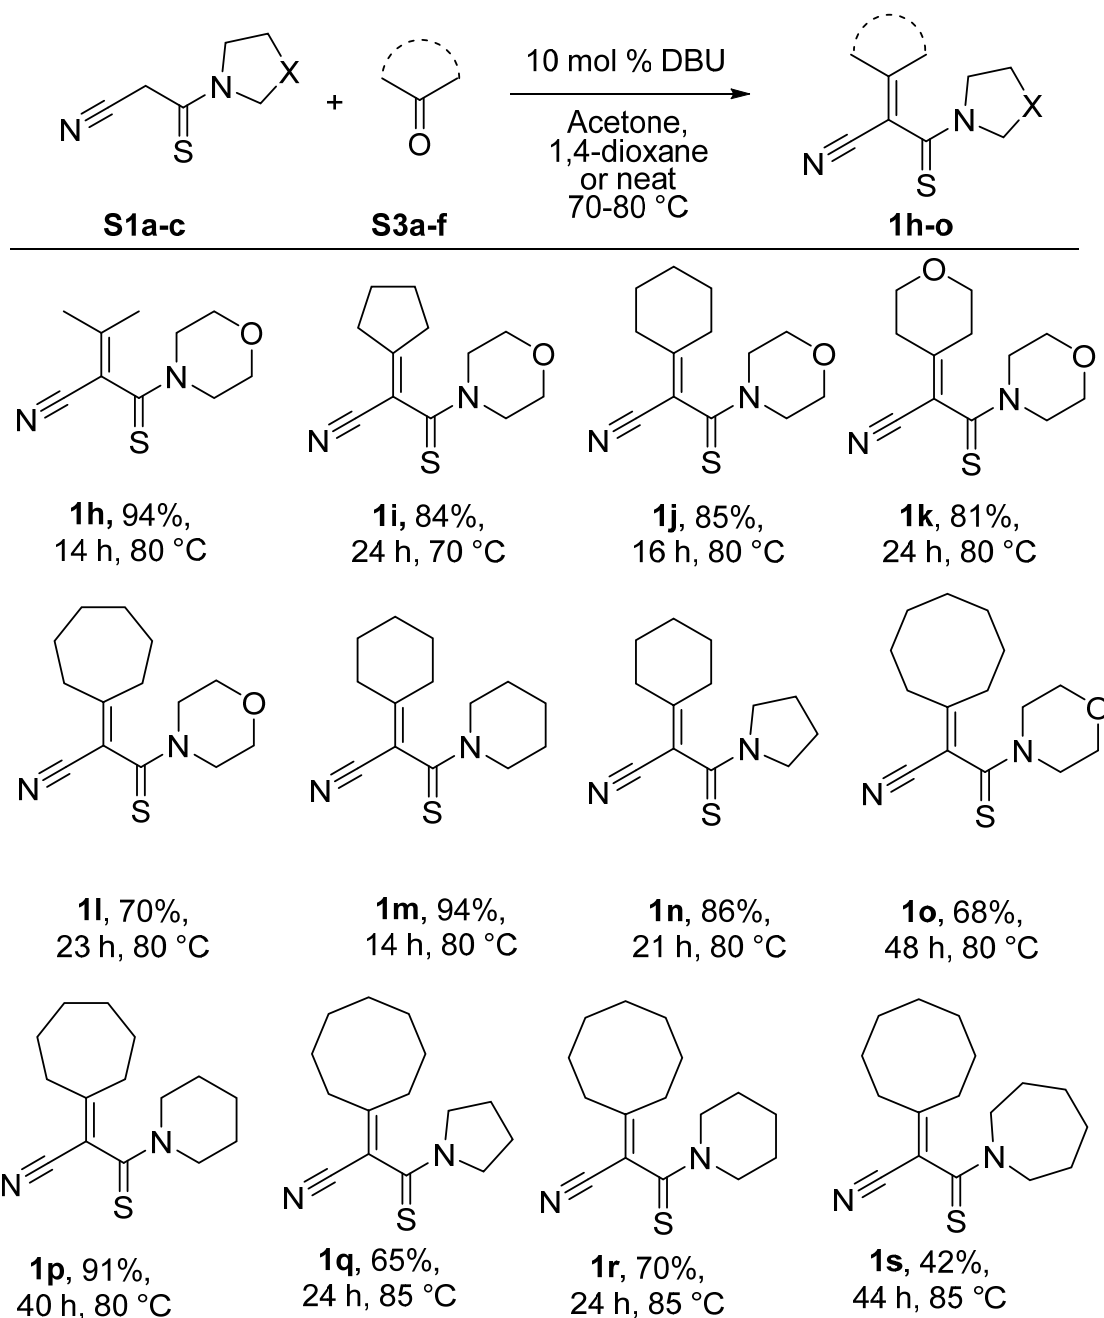

A mixture of 2-cyanothioacetamide **S1a-c** (1.0 equiv), appropriate ketone **S3a-g** (2.5–4.0 equiv) and DBU (0.1–1 equiv) in dry 1,4-dioxane (for **1k**) or in neat (for **1h,i,j,l-s**) was stirred for 14–48 h at 70–85 °C in an oven-dried 10 mL standard microwave vial. The vial was cooled to room temperature, then SiO<sub>2</sub> was added, and the solvent was evaporated under reduced pressure. The purification of the crude product by column chromatography on SiO<sub>2</sub> afforded the desired products **1h-s**.

### 3-Methyl-2-(morpholine-4-carbonothioyl)but-2-enitrile (**1h**)

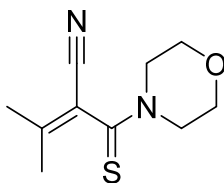

Compound **1h** was obtained according to the general procedure from 3-morpholino-3-thioxopropanenitrile (**S1a**) (500 mg, 1.0 equiv, 2.94 mmol), acetone **S3a** (2 mL), DBU (45 mg, 0.1 equiv, 0.29 mmol), 80 °C, reaction time is 14 h. The purification of the crude product by column chromatography (PE/EtOAc, gradient 40:10 to 20:30) afforded **1h** as a pale-yellow oil (94%, 580 mg). <sup>1</sup>H NMR (400 MHz, CDCl<sub>3</sub>-*d*): δ 4.42 – 4.40 (m, 1H), 4.16 – 4.13 (m, 1H), 3.81 – 3.70 (m, 6H), 2.14 (s, 3H), 1.89 (s, 3H). <sup>13</sup>C {<sup>1</sup>H} NMR (100 MHz, CDCl<sub>3</sub>-*d*): δ 189.8, 154.7, 115.3, 111.7, 66.5, 66.2, 51.8, 48.8, 23.9, 21.4. HRMS (ESI) *m/z*: [M + Na]<sup>+</sup> calcd. for C<sub>10</sub>H<sub>14</sub>N<sub>2</sub>OSNa<sup>+</sup> 233.0719; found 233.0716.

### 2-Cyclopentylidene-3-morpholino-3-thioxopropanenitrile (**1i**)

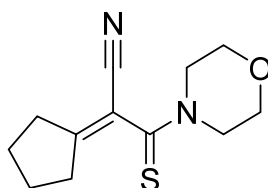

Compound **1i** was obtained according to the general procedure from 3-morpholino-3-thioxopropanenitrile (**S1a**) (400 mg, 1.0 equiv, 2.35 mmol), cyclopentanone (**S3b**) (791 mg, 4.0 equiv, 9.40 mmol), DBU (36 mg, 0.1 equiv, 0.24 mmol), 70 °C, reaction time is 24 h. The purification of the crude product by column chromatography (PE/EtOAc, gradient 50:0 to 30:20) afforded **1i** as a pale-yellow oil (84%, 465 mg) that crystallizes into powder when stored at room temperature, mp 109–112 °C. <sup>1</sup>H NMR (400 MHz, CDCl<sub>3</sub>-*d*): δ 4.26 (br. s, 2H), 3.82 – 3.74 (m, 6H), 2.69 (t, *J* = 6.0 Hz, 2H), 2.46 (br. s, 2H), 1.81 – 1.89 (m, 4H). <sup>13</sup>C {<sup>1</sup>H} NMR (100 MHz, CDCl<sub>3</sub>-*d*): δ 190.1, 169.2, 115.4, 107.5, 66.7, 66.4, 51.9, 49.0, 34.9, 33.1, 26.4, 25.8. HRMS (ESI) *m/z*: [M + H]<sup>+</sup> calcd. for C<sub>12</sub>H<sub>17</sub>N<sub>2</sub>OS<sup>+</sup> 237.1056; found 237.1059.

### 2-Cyclohexylidene-3-morpholino-3-thioxopropanenitrile (**1j**)

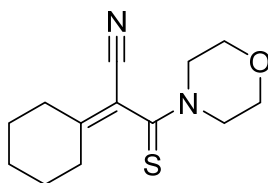

Compound **1j** was obtained according to the general procedure from 3-morpholino-3-thioxopropanenitrile (**S1a**) (1000 mg, 1.0 equiv, 5.87 mmol), cyclohexanone (**S3c**) (1730 mg, 3.0 equiv, 17.62 mmol), DBU (89 mg, 0.1 equiv, 0.59 mmol), 80 °C, reaction time is 16 h. The purification of the crude product by column chromatography (PE/EtOAc, gradient 50:0 to 25:25) afforded **1j** as a pale-yellow oil (85%, 1250 mg) that crystallizes into powder when stored at room temperature, mp 91–93 °C. <sup>1</sup>H NMR (400 MHz, CDCl<sub>3</sub>-*d*): δ 4.42 – 4.37 (m, 1H), 4.21 – 4.15 (m, 1H), 3.86 – 3.68 (m, 6H), 2.59 – 2.46 (m, 2H), 2.39 – 2.33 (m, 1H), 2.20 – 2.13 (m, 1H), 1.78 – 1.52 (m, 6H). <sup>13</sup>C{<sup>1</sup>H} NMR (100 MHz, CDCl<sub>3</sub>-*d*): δ 189.8, 161.4, 115.1, 108.3, 66.5, 66.3, 51.8, 48.9, 34.2, 31.7, 27.7, 27.1, 25.5. HRMS (ESI) *m/z*: [M + H]<sup>+</sup> calcd. for C<sub>13</sub>H<sub>19</sub>N<sub>2</sub>OS<sup>+</sup> 251.1212; found 251.1214.

### 3-Morpholino-2-(tetrahydro-4*H*-pyran-4-ylidene)-3-thioxopropanenitrile (**1k**)

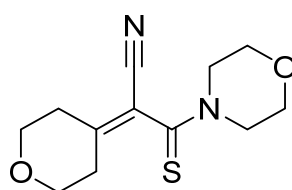

Compound **1k** was obtained according to the general procedure from 3-morpholino-3-thioxopropanenitrile (**S1a**) (300 mg, 1.0 equiv, 1.76 mmol), tetrahydro-4*H*-pyran-4-one (**S3d**) (529 mg, 3.0 equiv, 5.29 mmol), DBU (27 mg, 0.1 equiv, 0.18 mmol), 1,4-dioxane (1 mL), 80 °C, reaction time is 24 h. The purification of the crude product by column chromatography (PE/EtOAc, gradient 50:0 to 25:25) afforded **1k** as a colorless powder (81%, 360 mg), mp 191–193 °C. <sup>1</sup>H NMR (400 MHz, CDCl<sub>3</sub>-*d*): δ 4.45 – 4.41 (m, 1H), 4.17 – 4.12 (m, 1H), 3.87 – 3.72 (m, 10H), 2.73 – 2.57 (m, 3H), 2.34 – 2.29 (m, 1H). <sup>13</sup>C{<sup>1</sup>H} NMR (100 MHz, CDCl<sub>3</sub>-*d*): δ 188.6, 156.0, 114.6, 110.0, 68.1, 67.5, 66.5, 66.4, 52.0, 49.0, 34.5, 32.4. HRMS (ESI) *m/z*: [M + H]<sup>+</sup> calcd. for C<sub>12</sub>H<sub>17</sub>N<sub>2</sub>O<sub>2</sub>S<sup>+</sup> 253.1005; found 253.1005.

### 2-Cycloheptylidene-3-morpholino-3-thioxopropanenitrile (**1l**)

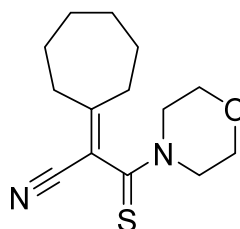

Compound **1l** was obtained according to the general procedure from 3-morpholino-3-thioxopropanenitrile (**S1a**) (300 mg, 1.0 equiv, 1.76 mmol), cycloheptanone (**S3e**) (593 mg, 3.0 equiv, 17.62 mmol), DBU (27 mg, 0.1 equiv, 0.18 mmol), 80 °C, reaction time is 23 h. The

purification of the crude product by column chromatography (PE/EtOAc, gradient 50:0 to 35:15) afforded **1l** as a yellow oil (70%, 326 mg) that crystallizes into powder when stored at room temperature, mp 99–100 °C. <sup>1</sup>H NMR (400 MHz, CDCl<sub>3</sub>-*d*): δ 4.48 – 4.42 (m, 1H), 4.17 – 4.11 (m, 1H), 3.86 – 3.76 (m, 4H), 3.73 – 3.65 (m, 2H), 2.74 – 2.56 (m, 3H), 2.31 – 2.25 (m, 1H), 1.78 – 1.71 (m, 3H), 1.59 (br. s, 4H), 1.50 – 1.44 (m, 1H). <sup>13</sup>C{<sup>1</sup>H} NMR (100 MHz, CDCl<sub>3</sub>-*d*): δ 190.3, 164.0, 115.3, 110.9, 66.6, 66.4, 51.8, 48.8, 35.4, 33.1, 29.8, 29.0, 27.2, 25.9. HRMS (ESI) *m/z*: [M + H]<sup>+</sup> calcd. for C<sub>14</sub>H<sub>21</sub>N<sub>2</sub>OS<sup>+</sup> 265.1369; found 265.1374.

### 2-Cyclohexylidene-3-(piperidin-1-yl)-3-thioxopropanenitrile (**1m**)

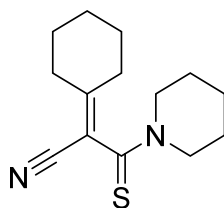

Compound **1m** was obtained according to the general procedure from 3-(piperidin-1-yl)-3-thioxopropanenitrile (**S1b**) (350 mg, 1.0 equiv, 2.08 mmol), cyclohexanone (**S3c**) (612 mg, 3.0 equiv, 6.24 mmol), DBU (32 mg, 0.1 equiv, 0.21 mmol), 80 °C, reaction time is 14 h. The purification of the crude product by column chromatography (PE/EtOAc, gradient 100:0 to 85:15) afforded **1m** as a pale-yellow powder (94%, 484 mg), mp 116–117 °C. <sup>1</sup>H NMR (400 MHz, CDCl<sub>3</sub>-*d*): δ 4.32 – 4.29 (m, 1H), 4.14 – 4.10 (m, 1H), 3.79 – 3.75 (m, 1H), 3.67 – 3.62 (m, 1H), 2.52 (br. s, 2H), 2.37 – 2.31 (m, 1H), 2.20 – 2.14 (m, 1H), 1.73 (br. s, 8H), 1.65 – 1.48 (m, 4H). <sup>13</sup>C{<sup>1</sup>H} NMR (100 MHz, CDCl<sub>3</sub>-*d*): δ 188.5, 160.0, 115.3, 108.9, 52.7, 50.0, 34.1, 31.7, 27.7, 27.1, 26.8, 25.6, 25.3, 24.0. HRMS (ESI) *m/z*: [M + H]<sup>+</sup> calcd. for C<sub>14</sub>H<sub>21</sub>N<sub>2</sub>S<sup>+</sup> 249.1420; found 249.1422.

### 2-Cyclohexylidene-3-(pyrrolidin-1-yl)-3-thioxopropanenitrile (**1n**)

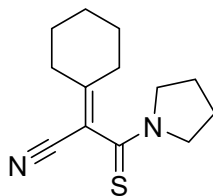

Compound **1n** was obtained according to the general procedure from 3-(pyrrolidin-1-yl)-3-thioxopropanenitrile (**S1c**) (400 mg, 1.0 equiv, 2.59 mmol), cyclohexanone (**S3c**) (764 mg, 3.0 equiv, 7.78 mmol), DBU (39 mg, 0.1 equiv, 0.26 mmol), 80 °C, reaction time is 21 h. The purification of the crude product by column chromatography (PE/EtOAc, gradient 100:0 to 80:20) afforded **1n** as a colorless powder (86%, 526 mg), mp 84–86 °C. <sup>1</sup>H NMR (400 MHz, CDCl<sub>3</sub>-*d*):

$\delta$  3.82 – 3.52 (m, 4H), 2.52 (br. s, 2H), 2.31 (br. s, 2H), 2.06 (br. s, 2H), 1.73 – 1.61 (m, 6H).  $^{13}\text{C}\{^1\text{H}\}$  NMR (100 MHz,  $\text{CDCl}_3$ -*d*):  $\delta$  186.7, 161.4, 115.1, 110.0, 53.0, 52.3, 34.2, 31.7, 27.8, 27.2, 26.3, 25.6, 24.5. HRMS (ESI) *m/z*:  $[\text{M} + \text{H}]^+$  calcd. for  $\text{C}_{13}\text{H}_{19}\text{N}_2\text{S}^+$  235.1263; found 235.1265.

### 2-Cyclooctylidene-3-morpholino-3-thioxopropanenitrile (**1o**)

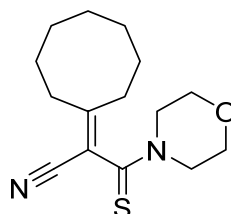

Compound **1o** was obtained according to the general procedure from 3-morpholino-3-thioxopropanenitrile (**S1a**) (360 mg, 1.0 equiv, 2.11 mmol), cyclooctanone (**S3f**) (801 mg, 3.0 equiv, 6.34 mmol), DBU (32 mg, 0.1 equiv, 0.21 mmol), 80 °C, reaction time is 48 h. The purification of the crude product by column chromatography (PE/EtOAc, gradient 100:0 to 70:30) afforded **1o** as a pale-yellow oil (68%, 401 mg) that crystallizes into powder when stored at room temperature, mp 117–119 °C.  $^1\text{H}$  NMR (400 MHz,  $\text{CDCl}_3$ -*d*):  $\delta$  4.45 – 4.40 (m, 1H), 4.20 – 4.14 (m, 1H), 3.84 – 3.75 (m, 4H), 3.72 – 3.63 (m, 2H), 2.69 – 2.63 (m, 1H), 2.50 – 2.42 (m, 2H), 2.25 – 2.19 (m, 1H), 1.93 – 1.84 (m, 2H), 1.80 – 1.76 (m, 2H), 1.66 – 1.60 (m, 1H), 1.56 – 1.43 (m, 5H).  $^{13}\text{C}\{^1\text{H}\}$  NMR (100 MHz,  $\text{CDCl}_3$ -*d*):  $\delta$  190.4, 165.6, 115.4, 109.8, 66.6, 66.4, 51.7, 48.7, 33.2, 33.0, 29.2, 28.0, 25.6, 25.1, 23.1. HRMS (ESI) *m/z*:  $[\text{M} + \text{H}]^+$  calcd. for  $\text{C}_{15}\text{H}_{23}\text{N}_2\text{OS}^+$  279.1525; found 279.1528.

### 2-Cycloheptylidene-3-(piperidin-1-yl)-3-thioxopropanenitrile (**1p**)

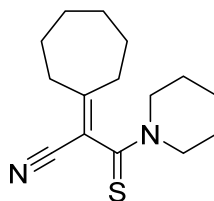

Compound **1p** was obtained according to the general procedure from 3-(piperidin-1-yl)-3-thioxopropanenitrile (**S1b**) (300 mg, 1.0 equiv, 1.78 mmol), cycloheptanone (**S3e**) (600 mg, 3.0 equiv, 5.35 mmol), DBU (27 mg, 0.1 equiv, 0.18 mmol), 80 °C, reaction time is 40 h. The purification of the crude product by column chromatography (PE/EtOAc, gradient 100:0 to 70:30) afforded **1p** as a pale-yellow oil (91%, 468 mg) that crystallizes into powder when stored at room temperature, mp 87–88 °C.  $^1\text{H}$  NMR (400 MHz,  $\text{CDCl}_3$ -*d*):  $\delta$  4.42 – 4.36 (m, 1H), 4.05 – 3.99 (m, 1H), 3.82 – 3.76 (m, 1H), 3.63 – 3.57 (m, 1H), 2.70 – 2.53 (m, 3H), 2.31 – 2.24 (m, 1H), 1.78 –

1.54 (m, 13H), 1.48 – 1.42 (m, 1H).  $^{13}\text{C}\{^1\text{H}\}$  NMR (100 MHz,  $\text{CDCl}_3-d$ ):  $\delta$  188.9, 162.5, 115.4, 111.5, 52.6, 49.9, 35.2, 32.9, 29.8, 29.0, 27.1, 26.8, 25.9, 25.3, 24.0. HRMS (ESI)  $m/z$ :  $[\text{M} + \text{H}]^+$  calcd. for  $\text{C}_{15}\text{H}_{23}\text{N}_2\text{S}^+$  263.1576; found 263.1576.

### 2-Cyclooctylidene-3-(pyrrolidin-1-yl)-3-thioxopropanenitrile (**1q**)

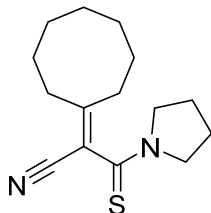

Compound **1q** was obtained according to the general procedure from 3-(pyrrolidin-1-yl)-3-thioxopropanenitrile (**S1c**) (500 mg, 1.0 equiv, 3.24 mmol), cyclooctanone (**S3f**) (1023 mg, 2.5 equiv, 8.10 mmol), DBU (493 mg, 1 equiv, 3.24 mmol), 85 °C, reaction time is 24 h. The purification of the crude product by column chromatography (PE/EtOAc, gradient 50:0 to 42:8) afforded **1q** as a pale-yellow oil (65%, 558 mg) that crystallizes into powder when stored at room temperature, mp 81–83 °C.  $^1\text{H}$  NMR (400 MHz,  $\text{CDCl}_3-d$ ):  $\delta$  3.86 – 3.83 (m, 2H), 3.62 (br s, 2H), 2.58 (br s, 2H), 2.40 (br s, 2H), 2.09 – 2.06 (m, 4H), 1.92 – 1.86 (m, 2H), 1.80 – 1.76 (m, 2H), 1.50 (br s, 6H).  $^{13}\text{C}\{^1\text{H}\}$  NMR (100 MHz,  $\text{CDCl}_3-d$ ):  $\delta$  187.2, 165.6, 115.3, 111.5, 52.8, 52.0, 33.2, 32.8, 28.9, 27.9, 26.3, 25.7, 25.2, 24.4, 23.3. HRMS (ESI)  $m/z$ :  $[\text{M} + \text{H}]^+$  calcd. for  $\text{C}_{15}\text{H}_{23}\text{N}_2\text{S}^+$  263.1576; found 263.1575.

### 2-Cyclooctylidene-3-(piperidin-1-yl)-3-thioxopropanenitrile (**1r**)

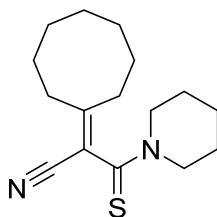

Compound **1r** was obtained according to the general procedure from 3-(piperidin-1-yl)-3-thioxopropanenitrile (**S1b**) (500 mg, 1.0 equiv, 2.97 mmol), cyclooctanone (**S3f**) (1125 mg, 3.0 equiv, 8.91 mmol), DBU (821 mg, 1 equiv, 2.97 mmol), 85 °C, reaction time is 24 h. The purification of the crude product by column chromatography (PE/EtOAc, gradient 100:0 to 82:18) afforded **1r** as a pale-yellow oil (70%, 573 mg) that crystallizes into powder when stored at room temperature, mp 114–116 °C.  $^1\text{H}$  NMR (400 MHz,  $\text{CDCl}_3-d$ ):  $\delta$  4.40 – 4.35 (m, 1H), 4.09 – 4.03 (m, 1H), 3.79 – 3.74 (m, 1H), 3.63 – 3.57 (m, 1H), 2.67 – 2.61 (m, 1H), 2.50 – 2.41 (m, 1H), 2.26 – 2.19 (m, 1H), 1.95 – 1.82 (m, 2H), 1.81 – 1.68 (m, 7H), 1.66 – 1.58 (m, 2H), 1.56 – 1.38 (m, 5H).  $^{13}\text{C}\{^1\text{H}\}$  NMR (100 MHz,  $\text{CDCl}_3-d$ ):  $\delta$  189.1, 164.0, 115.6, 110.5, 52.6, 49.9, 33.1, 32.9,



29.1, 28.0, 26.8, 25.6, 25.3, 25.1, 24.1, 23.1. HRMS (ESI)  $m/z$ :  $[M + H]^+$  calcd. for  $C_{16}H_{25}N_2S^+$  277.1733; found 277.1733.

### 3-(Azepan-1-yl)-2-cyclooctylidene-3-thioxopropanenitrile (**1s**)

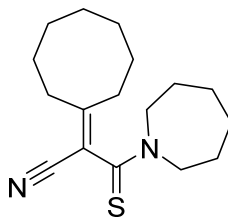

Compound **1s** was obtained according to the general procedure from 3-(azepan-1-yl)-3-thioxopropanenitrile (**S1d**) (500 mg, 1.0 equiv, 2.74 mmol), cyclooctanone (**S3f**) (1038 mg, 3.0 equiv, 8.23 mmol), DBU (417 mg, 1 equiv, 2.74 mmol), 85 °C, reaction time is 40 h. The purification of the crude product by column chromatography (PE/EtOAc, gradient 50:0 to 42:8) afforded **1s** as a pale-yellow oil (42%, 338 mg) that crystallizes into powder when stored at room temperature, mp 106–108 °C.  $^1H$  NMR (400 MHz,  $CDCl_3-d$ ):  $\delta$  4.24 – 4.18 (m, 1H), 3.97 – 3.90 (m, 1H), 3.86 – 3.80 (m, 1H), 3.65 – 3.58 (m, 1H), 2.68 – 2.62 (m, 1H), 2.52 – 2.40 (m, 2H), 2.20 – 2.13 (m, 1H), 2.05 – 1.95 (m, 1H), 1.93 – 1.81 (m, 4H), 1.79 – 1.73 (m, 3H), 1.67 – 1.58 (m, 4H), 1.57 – 1.37 (m, 6H).  $^{13}C$  { $^1H$ } NMR (100 MHz,  $CDCl_3-d$ ):  $\delta$  190.3, 163.8, 115.7, 110.9, 53.8, 52.8, 33.0, 32.9, 29.4, 28.7, 28.1, 27.8, 26.1, 25.5, 25.4, 25.1, 22.8. HRMS (ESI)  $m/z$ :  $[M + H]^+$  calcd. for  $C_{17}H_{27}N_2S^+$  291.1889; found 291.1887.

### (*Z/E*)-3-((4-Chlorophenyl)amino)-2-(pyrrolidine-1-carbonothioyl)acrylonitrile (**1t**)

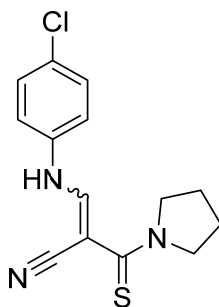

To a solution of 3-(dimethylamino)-2-(pyrrolidine-1-carbonothioyl)acrylonitrile (**S1d**) (261 mg, 1.0 equiv, 1.25 mmol), 4-chloroaniline (175 mg, 1.1 equiv, 1.375 mmol) in EtOH (5 mL) concentrated HCl (127 mg, 1.0 equiv, 1.25 mmol) was added and the mixture was stirred for 3 h at 60 °C. The suspension was cooled down to room temperature, filtered and washed with EtOH afforded **1p** as a yellow powder (65%, 238 mg), mp 159–161 °C.  $^1H$  NMR (400 MHz,  $DMSO-d_6$ ):  $\delta$  10.52\* and 10.46 (both d,  $J = 13.4^*$  and 12.1 Hz, 1H), 8.52 and 7.95\* (both d,  $J = 11.1$  and 13.3\* Hz, 1H), 7.42 – 7.34 (m, 4H), 3.81 – 3.72 (m, 4H), 1.96 (br. s, 4H).  $^{13}C$  { $^1H$ } NMR (100 MHz,

DMSO-*d*<sub>6</sub>):  $\delta$  186.9, 183.8\*, 152.2, 144.3\*, 139.2, 138.6\*, 129.4, 129.3\*, 128.0, 127.4\*, 119.2\*, 119.1, 118.3\*, 116.2, 86.9, 85.6\*, 55.1, 53.4\*, 53.3, 52.7\*, 26.6, 26.0\*, 24.0, 23.8\*. HRMS (ESI) *m/z*: [M + H]<sup>+</sup> calcd. for C<sub>14</sub>H<sub>15</sub>ClN<sub>3</sub>S<sup>+</sup> 292.0670; found 292.0672.

### 3-(Morpholine-4-carbonothioyl)-4-phenylbut-3-en-2-one (1w)

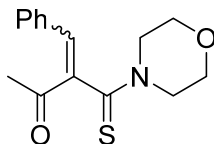

A mixture of 4-morpholino-4-thioxobutan-2-one (**S1f**) (374 mg, 1.0 equiv, 2.0 mmol), benzaldehyde **S2a** (261 mg, 1.25 equiv, 2.5 mmol), DBU (30 mg, 0.1 equiv, 0.20 mmol) and glacial acetic acid (12 mg, 0.1 equiv, 0.20 mmol) in toluene (3 mL) was stirred for 16 h at 80 °C. The solvent was evaporated under reduced pressure. Ethanol (3 mL) was added to a residue and the formed suspension was kept in the fridge for 1 h. The precipitate was filtered off and washed with cold ethanol afforded **1w** as a yellow powder (57%, 315 mg), mp 131–133 °C. <sup>1</sup>H NMR (400 MHz, DMSO-*d*<sub>6</sub>):  $\delta$  7.65 – 7.63 (m, 2H), 7.48 – 7.40 (m, 3H), 7.36 (s, 1H), 4.35 – 4.30 (m, 1H), 4.27 – 4.21 (m, 1H), 3.77 – 3.65 (m, 2H), 3.62 – 3.54 (m, 1H), 3.50 – 3.44 (m, 2H), 3.13 – 3.07 (m, 1H), 2.43 (s, 3H). <sup>13</sup>C{<sup>1</sup>H} NMR (100 MHz, DMSO-*d*<sub>6</sub>):  $\delta$  195.5, 194.3, 139.6, 133.8, 133.2, 130.2, 128.8, 65.5, 65.2, 51.1, 47.7, 26.6. HRMS (ESI) *m/z*: [M + H]<sup>+</sup> calcd. for C<sub>15</sub>H<sub>18</sub>NO<sub>2</sub>S<sup>+</sup> 276.1053; found 276.1053.

### Methyl 2-(morpholine-4-carbonothioyl)-3-phenylacrylate (1x)

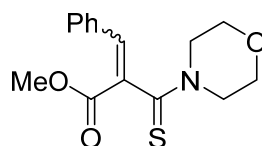

A mixture of methyl 3-morpholino-3-thioxopropanoate (**S1g**) (406 mg, 1.0 equiv, 2.0 mmol), benzaldehyde **S2a** (233 mg, 1.10 equiv, 2.2 mmol), DBU (30 mg, 0.1 equiv, 0.20 mmol) and glacial acetic acid (12 mg, 0.1 equiv, 0.20 mmol) in toluene (4 mL) was stirred for 16 h at 80 °C. The solvent was evaporated under reduced pressure. Ethanol (3 mL) was added to a residue and the formed suspension was kept in the fridge for 1 h. The precipitate was filtered off and washed with cold ethanol afforded **1x** as a yellow powder (71%, 412 mg), mp 138–139 °C. <sup>1</sup>H NMR (400 MHz, DMSO-*d*<sub>6</sub>):  $\delta$  7.62 – 7.60 (m, 2H), 7.47 – 7.43 (m, 3H), 7.35 (s, 1H), 4.30 – 4.27 (m, 2H), 3.77 (s, 3H), 3.73 – 3.63 (m, 3H), 3.58 – 3.47 (m, 2H), 3.20 – 3.14 (m, 1H). <sup>13</sup>C{<sup>1</sup>H} NMR (100 MHz, DMSO-*d*<sub>6</sub>):  $\delta$  192.4, 164.4, 134.3, 132.8, 131.0, 130.1, 128.8, 65.4, 65.1, 52.5, 51.3, 47.8. HRMS (ESI) *m/z*: [M + H]<sup>+</sup> calcd. for C<sub>15</sub>H<sub>18</sub>NO<sub>3</sub>S<sup>+</sup> 292.1002; found 292.1001.

## 2-Cyano-3-phenyl-*N*-(*p*-tolyl)prop-2-enethioamide (**1y**)

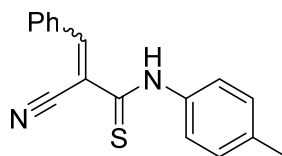

A mixture of 2-cyano-*N*-(*p*-tolyl)ethanethioamide (**S1e**) (1000 mg, 1.0 equiv, 5.25 mmol), benzaldehyde **S2a** (781 mg, 1.4 equiv, 7.36 mmol) and DBU (80 mg, 0.1 equiv, 5.25 mmol) in ethanol (5 mL) was stirred for 15 h at room temperature. The formed suspension was kept in the fridge for 1 h. The precipitate was filtered off and washed with cold ethanol. The product was recrystallized from ethanol and filtered off. The mother liquor was evaporated under reduced pressure and the formed precipitate was filtered off and washed with cold ethanol afforded **1y** as a bright-red powder (27%, 400 mg), mp 131–132 °C. <sup>1</sup>H NMR (400 MHz, DMSO-*d*<sub>6</sub>): δ 12.02 (s, 1H), 8.02 (s, 1H), 8.00 – 7.97 (m, 2H), 7.68 (d, *J* = 8.1 Hz, 2H), 7.61 – 7.55 (m, 3H), 7.26 (d, *J* = 8.1 Hz, 2H), 2.33 (s, 3H). <sup>13</sup>C{<sup>1</sup>H} NMR (100 MHz, DMSO-*d*<sub>6</sub>): δ 188.4, 145.5, 136.6, 136.1, 132.1, 132.0, 130.0, 129.2, 129.1, 123.8, 116.5, 114.2, 20.7. HRMS (ESI) *m/z*: [M + H]<sup>+</sup> calcd. for C<sub>17</sub>H<sub>15</sub>N<sub>2</sub>S<sup>+</sup> 279.0950; found 279.0950.

## 2-Cycloheptylidene-3-morpholino-3-oxopropanenitrile (**Am-1**)

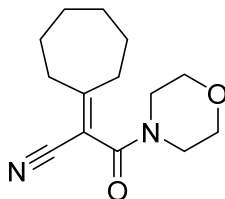

A mixture of 3-morpholino-3-oxopropanenitrile (300 mg, 1.0 equiv, 1.94 mmol), cycloheptanone (**S3e**) (873 mg, 4.0 equiv, 7.78 mmol) and DBU (30 mg, 0.1 equiv, 0.19 mmol) was stirred for 24 h at 80 °C in an oven-dried 10 mL standard microwave vial. The vial was cooled to room temperature. The purification of the crude product by column chromatography on SiO<sub>2</sub> afforded **Am-1** as a white powder (75%, 364 mg), mp 60–62 °C. <sup>1</sup>H NMR (400 MHz, CDCl<sub>3</sub>-*d*): δ 3.70 – 3.65 (m, 3H), 3.51 – 3.49 (m, 1H), 2.71 – 2.68 (m, 1H), 2.50 – 2.47 (m, 1H), 1.76 – 1.65 (m, 2H), 1.60 – 1.53 (m, 2H). <sup>13</sup>C {<sup>1</sup>H} NMR (100 MHz, CDCl<sub>3</sub>-*d*): δ 171.1, 161.9, 115.2, 105.9, 66.8, 47.4, 42.5, 35.8, 33.7, 29.4, 29.1, 26.8, 26.5. HRMS (ESI) *m/z*: [M + H]<sup>+</sup> calcd. for C<sub>14</sub>H<sub>21</sub>N<sub>2</sub>O<sub>2</sub><sup>+</sup> 249.1597; found 249.1599.

## Synthesis of 1-Sulfonyl-1,2,3-Triazole **2g** and Diazo Compounds **2p,s-v**

### 4-Cyclopropyl-1-tosyl-1*H*-1,2,3-triazole (**2g**)

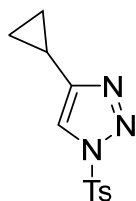

To a solution of ethynylcyclopropane (500 mg, 1.0 equiv, 7.56 mmol) and CuTC (144 mg, 0.1 equiv, 0.76 mmol) in toluene (17 mL) tosyl azide (1490 mg, 1.0 equiv, 7.56 mmol) in toluene (10 mL) was added dropwise at room temperature and the solution was stirred for 2 h. The solvent was evaporated, and the formed precipitate was triturated with the mixture of PE/DCM (8:1). Purification of the crude product by flash chromatography (PE/EtOAc, gradient 50:0 to 40:10) afforded **2g** (70%, 1390 mg) as a colorless powder, mp 105–106 °C (lit.<sup>16</sup> 105–106 °C). <sup>1</sup>H NMR (400 MHz, DMSO-*d*<sub>6</sub>): δ 7.96 (d, *J* = 8.3 Hz, 2H), 7.79 (s, 1H), 7.36 (d, *J* = 8.1 Hz, 2H), 2.43 (s, 3H), 1.96 – 1.89 (m, 1H), 0.99 – 0.94 (m, 2H), 0.88 – 0.84 (m, 2H).

### 3-Diazo-7-methylindolin-2-one (**2p**)

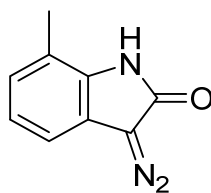

3-Diazo-7-methylindolin-2-one (**2p**) was purchased from a commercial source. Mp 178–176 °C (decomp.). <sup>1</sup>H NMR (400 MHz, DMSO-*d*<sub>6</sub>): δ 10.68 (br. s, 1H), 7.23 (d, *J* = 4.4 Hz, 1H), 6.92 (d, *J* = 4.4 Hz, 2H), 2.23 (s, 3H). <sup>13</sup>C {<sup>1</sup>H} NMR (100 MHz, DMSO-*d*<sub>6</sub>): δ 168.2, 131.2, 126.4, 121.3, 119.4, 116.7, 116.5, 60.2, 16.3. HRMS (ESI) *m/z*: [M + H]<sup>+</sup> calcd. for C<sub>9</sub>H<sub>8</sub>N<sub>3</sub>O<sup>+</sup> 174.0662; found 174.0661.

### Dimethyl 2-diazomalonate (**2s**)

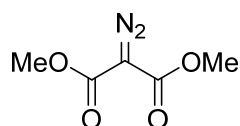

To a solution of dimethyl malonate (500 mg, 1.0 equiv, 3.78 mmol) and Et<sub>3</sub>N (383 mg, 1.0 equiv, 3.78 mmol) in acetonitrile (10 mL) tosyl azide (830 mg, 1.1 equiv, 4.16 mmol) in acetonitrile (10 mL) was added dropwise at 0 °C and the solution was stirred for 16 h at room temperature. The solvent was evaporated, and the formed precipitate was triturated CCl<sub>4</sub> and filtered off. The mother liquor was evaporated under reduced pressure. The residue was dissolved in DCM and purified by flash chromatography (DCM/EtOAc, gradient 25:0 to 24:1) afforded **2s** (93%, 557 mg) as a pale-yellow liquid. <sup>1</sup>H NMR (400 MHz, CDCl<sub>3</sub>-*d*): δ 3.83 (s, 6H).

### Methyl 2-diazo-2-phenylacetate (**2t**)

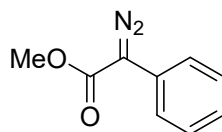

Red oil. <sup>1</sup>H NMR (400 MHz, CDCl<sub>3</sub>-*d*): δ 7.48 (d, *J* = 8.3 Hz, 2H), 7.39 (t, *J* = 7.9 Hz, 2H), 7.19 (t, *J* = 7.4 Hz, 1H), 3.87 (s, 3H).

## 2-Diazo-1-phenylbutane-1,3-dione (2u)

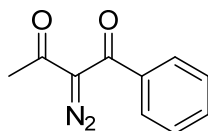

To a solution of 1-phenylbutane-1,3-dione (300 mg, 1.0 equiv, 1.85 mmol) and Et<sub>3</sub>N (187 mg, 1.0 equiv, 1.85 mmol) in acetonitrile (4 mL) mesyl azide (246 mg, 1.1 equiv, 2.03 mmol) in acetonitrile (7 mL) was added dropwise at 0 °C and the solution was stirred for 16 h at room temperature. The solvent was evaporated, and the residue was dissolved in minimal volume of DCM and purified by flash chromatography (PE/EtOAc, gradient 9:1 to 4:1) afforded **2u** (80%, 280 mg) as a pale-yellow solid, mp 62–63 °C (lit.<sup>27</sup> 63.5–64.5 °C). <sup>1</sup>H NMR (400 MHz, CDCl<sub>3</sub>-*d*): δ 7.64 (d, *J* = 7.3 Hz, 2H), 7.58 (t, *J* = 7.3 Hz, 1H), 7.49 (t, *J* = 7.5 Hz, 2H), 2.58 (s, 3H).

## 3-Diazo-5-methylindolin-2-one (2v)

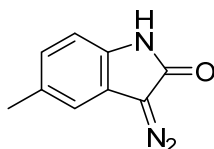

Red powder, mp 178–180 °C (lit.<sup>28</sup> 184–185 °C). <sup>1</sup>H NMR (400 MHz, DMSO-*d*<sub>6</sub>): δ 10.53 (s, 1H), 7.21 (s, 1H), 6.90 (d, *J* = 7.9 Hz, 1H), 6.79 (d, *J* = 7.9 Hz, 1H), 2.27 (s, 3H).

## Synthesis of catalysts Rh<sub>2</sub>(*S*-DBPTTL)<sub>4</sub> and Rh<sub>2</sub>(*S*-PTTR)<sub>4</sub> (*S*)-2-(1,3-Dioxoisindolin-2-yl)-3-(1*H*-indol-3-yl)propanoic acid (**L1**)

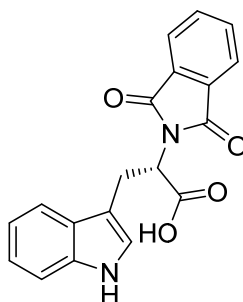

A 50 mL round-bottom flask was charged with *L*-tryptophan (1000 mg, 4.9 mmol), phthalic anhydride (725 mg, 1.0 equiv, 4.9 mmol), triethylamine (50 mg, 0.1 equiv, 0.49 mmol), toluene (25 mL) and equipped with a Dean-Stark apparatus. The mixture was heated to reflux and stirred for 18 h. The solvent was evaporated and the crude product was purified by column chromatography on SiO<sub>2</sub> (PE/EtOAc, gradient 50:0 to 25:25) afforded after trituration in diethyl ether and *n*-hexane and filtration **L1** as a yellow powder (72%, 1182 mg), mp 172–174 °C (lit.<sup>22</sup> 170 °C), [α]<sub>D</sub><sup>20</sup> = –184 (C = 0.49, EtOH) (lit.<sup>29</sup> [α]<sub>D</sub><sup>20</sup> = –212 (C = 1, EtOH)) <sup>1</sup>H NMR (400

MHz, DMSO-*d*<sub>6</sub>):  $\delta$  13.30 (s, 1H), 10.73 (s, 1H), 7.81 (s, 3H), 7.48 (d,  $J$  = 7.8 Hz, 1H), 7.25 (d,  $J$  = 8.0 Hz, 1H), 7.03 – 6.98 (m, 2H), 6.89 (t,  $J$  = 7.4 Hz, 1H), 5.14 – 5.10 (m, 1H), 3.62 – 3.54 (m, 2H).

**(*S*)-2-(4,7-Dibromo-1,3-dioxoisindolin-2-yl)-3,3-dimethylbutanoic acid (L2)**

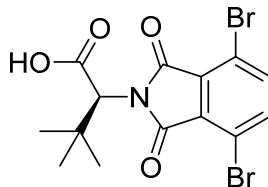

A 50 mL round-bottom flask was charged with *L-tert*-leucine (500 mg, 3.8 mmol), 4,7-dibromoisobenzofuran-1,3-dione (**S3**) (1170 mg, 1.0 equiv, 3.8 mmol), triethylamine (38 mg, 0.1 equiv, 0.38 mmol), dry toluene (15 mL) and equipped with a Dean-Stark apparatus. The mixture was heated to reflux and stirred for 15 h. The solvent was evaporated, and the crude product was purified by column chromatography on SiO<sub>2</sub> (PE/EtOAc, gradient 50:0 to 35:15) afforded after trituration in *n*-hexane and centrifugation **L2** as a colorless powder (80%, 1284 mg), mp 195–197 °C,  $[\alpha]_D^{20} = +20.4$  (C = 1.8, CHCl<sub>3</sub>). <sup>1</sup>H NMR (400 MHz, CDCl<sub>3</sub>-*d*):  $\delta$  10.67 (br. s, 1H), 8.10 (s, 2H), 4.69 (s, 1H), 1.16 (s, 9H). <sup>13</sup>C {<sup>1</sup>H} NMR (100 MHz, CDCl<sub>3</sub>-*d*):  $\delta$  173.6, 166.1, 131.9, 131.4, 128.9, 60.4, 35.9, 28.1. HRMS (ESI) *m/z*: [M + H]<sup>+</sup> calcd. for C<sub>14</sub>H<sub>14</sub>Br<sub>2</sub>NO<sub>4</sub><sup>+</sup> 417.9285; found 417.9283.

**Rh<sub>2</sub>(*S*-PTTR)<sub>4</sub>**

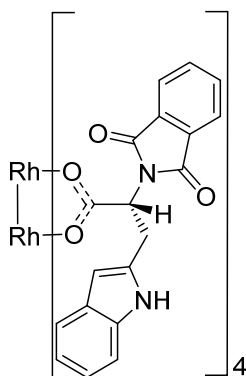

To a mixture of Rh<sub>2</sub>(OAc)<sub>4</sub> (100 mg, 1.0 equiv, 0.23 mmol) and (*S*)-PTTR (454 mg, 6.0 equiv, 1.36 mmol) was added dry chlorobenzene (25 mL). The flask was adapted with a Soxhlet extractor containing a cartridge filled with a mixture of Na<sub>2</sub>CO<sub>3</sub> and sand (1:1). The solution was heated to 150 °C for 24 h. The reaction mixture was cooled down to room temperature and concentrated under reduced pressure. The residue was dissolved in acetonitrile, concentrated under reduced pressure, then dissolved in ethyl acetate, the obtained solution was heated to reflux and filtered

off. The mother liquor was cooled down and washed with saturated solution of  $\text{Na}_2\text{CO}_3$  (3 times) and with water, dried over anhydrous  $\text{Na}_2\text{SO}_4$ , filtered, and concentrated in vacuo. The green residue was then dissolved in DCM and was purified by column chromatography on  $\text{SiO}_2$  (DCM/EtOAc, gradient 30:0 to 25:5) to provide the title product as a green solid (256 mg, 73%),  $[\alpha]_D^{20} = -5,1$  ( $C = 0.7$ , MeCN).  $^1\text{H NMR}$  (400 MHz,  $\text{DMSO-}d_6$ ):  $\delta$  10.74 (s, 4H, NH), 7.78 – 7.76 (m, 8H), 7.70 – 7.68 (m, 8H), 7.56 (d,  $J = 7.8$  Hz, 4H), 7.27 (d,  $J = 8.0$  Hz, 4H), 7.07 (s, 4H), 7.01 (t,  $J = 7.5$  Hz, 4H), 6.90 (t,  $J = 7.4$  Hz, 4H), 5.21 (t,  $J = 7.9$  Hz, 4H), 3.56 (d,  $J = 7.6$  Hz, 8H).  $^{13}\text{C}\{^1\text{H}\}$  NMR (100 MHz,  $\text{CDCl}_3$ - $d$ ):  $\delta$  188.5, 166.8, 136.0, 134.6, 130.9, 127.1, 123.4, 123.1, 120.9, 118.3, 118.0, 111.4, 109.7, 53.8, 24.7. HRMS (ESI)  $m/z$ :  $[\text{M} + \text{H}]^+$  calcd. for  $\text{C}_{76}\text{H}_{53}\text{N}_8\text{O}_{16}\text{Rh}_2^+$  1539.1684; found 1539.1697.

#### **$\text{Rh}_2(\text{S-DBPTTL})_4$**

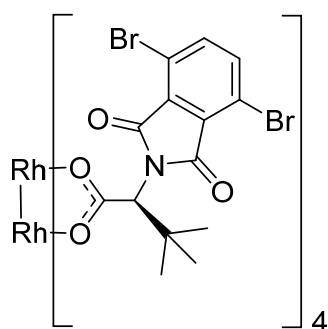

To a mixture of  $\text{Rh}_2(\text{OAc})_4$  (70 mg, 1.0 equiv, 0.16 mmol) and (*S*)-DBPTTL (398 mg, 6.0 equiv, 0.95 mmol) was added dry chlorobenzene (15 mL). The flask was adapted with a Soxhlet extractor containing a cartridge filled with a mixture of  $\text{Na}_2\text{CO}_3$  and sand (1:1). The solution was heated to 150 °C for 24 h. The reaction mixture was cooled down and concentrated under reduced pressure. The residue was dissolved in DCM and washed with saturated solution of  $\text{Na}_2\text{CO}_3$  (3 times) and with water, dried over anhydrous  $\text{Na}_2\text{SO}_4$  and concentrated in vacuo. The green residue was then dissolved in DCM and was purified by column chromatography on  $\text{SiO}_2$  (PE/EtOAc, gradient 50:0 to 36:14) to provide the title product as a light green solid (281 mg, 95%),  $[\alpha]_D^{20} = +55,3$  ( $C = 0.07$ ,  $\text{CHCl}_3$ ).  $^1\text{H NMR}$  (400 MHz,  $\text{CDCl}_3$ - $d$ ):  $\delta$  8.05 (br. s, 8H), 4.82 (s, 4H), 1.08 (s, 36H).  $^{13}\text{C}\{^1\text{H}\}$  NMR (100 MHz,  $\text{CDCl}_3$ - $d$ ):  $\delta$  187.2, 166.1, 131.7, 131.5, 128.7, 62.0, 35.7, 28.0. HRMS (ESI)  $m/z$ :  $[\text{M} + \text{H}]^+$  calcd. for  $\text{C}_{56}\text{H}_{48}\text{Br}_8\text{N}_4\text{O}_{16}\text{Rh}_2\text{Na}^+$  1892.4539; found 1892.4535.



## Optimization study for the reaction of thioamide **1a** with 1-sulfonyl-1,2,3-triazole **2a**

**Table S1.** Optimization of the synthesis of dihydrothiophene **3aa**

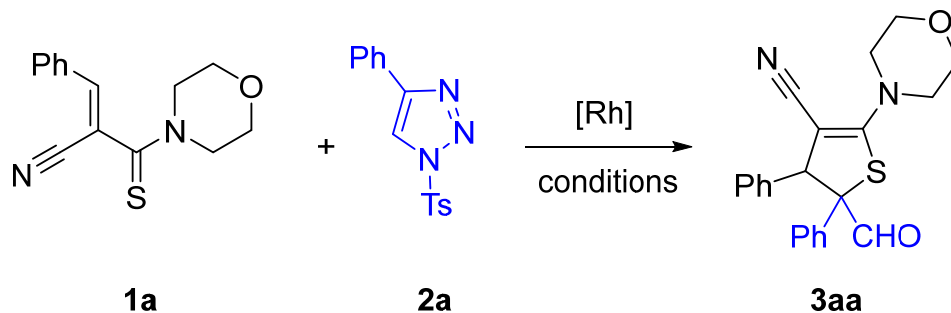

| Entry | Solvent (T, °C)                    | Catalyst (mol %)                            | Time, h | Equiv of <b>2a</b> | Yield <sup>a</sup> , % | dr <sup>b</sup> |
|-------|------------------------------------|---------------------------------------------|---------|--------------------|------------------------|-----------------|
| 1     | CHCl <sub>3</sub> (80)             | Rh <sub>2</sub> (Oct) <sub>4</sub> (2.0)    | 13      | 1.1                | 52                     | 83:17           |
| 2     | CHCl <sub>3</sub> (80)             | Rh <sub>2</sub> (OAc) <sub>4</sub> (2.0)    | 13      | 1.1                | 35                     | 75:25           |
| 3     | CHCl <sub>3</sub> (80)             | Rh <sub>2</sub> (esp) <sub>2</sub> (2.0)    | 13      | 1.1                | 75                     | 83:17           |
| 4     | CHCl <sub>3</sub> (80)             | Rh <sub>2</sub> (Piv) <sub>4</sub> (2.0)    | 13      | 1.1                | 81                     | 83:17           |
| 5     | 1,2-DCE (80)                       | Rh <sub>2</sub> (Piv) <sub>4</sub> (2.0)    | 13      | 1.1                | 68                     | 81:19           |
| 6     | C <sub>6</sub> H <sub>6</sub> (80) | Rh <sub>2</sub> (Piv) <sub>4</sub> (2.0)    | 13      | 1.1                | 60                     | 83:17           |
| 7     | CHCl <sub>3</sub> (70)             | Rh <sub>2</sub> (Piv) <sub>4</sub> (2.0)    | 13      | 1.1                | 70                     | 83:17           |
| 8     | CHCl <sub>3</sub> (50)             | Rh <sub>2</sub> (Piv) <sub>4</sub> (2.0)    | 13      | 1.1                | 51                     | 76:24           |
| 9     | CHCl <sub>3</sub> (40)             | Rh <sub>2</sub> (Piv) <sub>4</sub> (2.0)    | 13      | 1.1                | 44                     | 70:30           |
| 10    | CHCl <sub>3</sub> (80)             | Rh <sub>2</sub> (S-PTAD) <sub>4</sub> (1.0) | 13      | 1.1                | NR                     | –               |
| 11    | CHCl <sub>3</sub> (90)             | Rh <sub>2</sub> (S-PTAD) <sub>4</sub> (1.0) | 13      | 1.1                | NR                     | –               |
| 12    | CHCl <sub>3</sub> (100)            | Rh <sub>2</sub> (S-PTAD) <sub>4</sub> (1.0) | 13      | 1.1                | NR                     | –               |
| 13    | CHCl <sub>3</sub> (100)            | Rh <sub>2</sub> (S-DOSP) <sub>4</sub> (1.0) | 13      | 1.1                | NR                     | –               |
| 14    | CHCl <sub>3</sub> (100)            | Rh <sub>2</sub> (S-PTTL) <sub>4</sub> (1.0) | 13      | 1.1                | NR                     | –               |
| 15    | CHCl <sub>3</sub> (100)            | Rh <sub>2</sub> (S-NTTL) <sub>4</sub> (1.0) | 13      | 1.1                | NR                     | –               |

Conditions: thioamide **1a** (0.19 mmol), triazole **2a** (0.21 mmol, 1.1 equiv), solvent (1 mL).

<sup>a</sup>Isolated yields. <sup>b</sup>(4*RS*,5*SR*:4*RS*,5*RS*). Determined by <sup>1</sup>H NMR analysis of the crude mixture.

## Synthesis of dihydrothiophenes **3**

### General procedure for the synthesis of dihydrothiophenes **3**

To an oven-dried 10 mL standard microwave vial, a mixture of rhodium (II) pivalate dimer (2.0 mol %), thioamide **1** (1.0 equiv), 1-sulfonyl-1,2,3-triazole **2** (1.1–1.5 equiv) and dry chloroform (1–1.5 mL) were added. The resulting solution was stirred for 9–17 h at 80 °C. Reaction solution was cooled down to room temperature and directly transferred on SiO<sub>2</sub> or neutral alumina (for **3da**) and purified.

**(4*RS*,5*SR*)-5-Formyl-2-morpholino-4,5-diphenyl-4,5-dihydrothiophene-3-carbonitrile (3aa)**

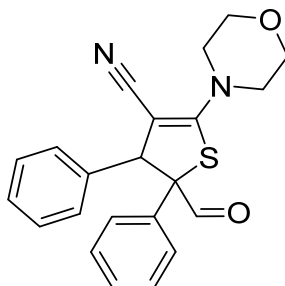

Compound **3aa** was obtained according to the general procedure from 2-(morpholine-4-carbonothioyl)-3-phenylacrylonitrile (**1a**) (50 mg, 1.0 equiv, 0.19 mmol), 1-sulfonyl-1,2,3-triazole **2a** (64 mg, 1.1 equiv, 0.21 mmol), Rh<sub>2</sub>(Piv)<sub>4</sub> (2.6 mg), chloroform (1 mL), 80 °C, reaction time is 13 h. The purification of the crude product by column chromatography on SiO<sub>2</sub> (PE/EtOAc, gradient 50:0 to 35:15) afforded **3aa** as a colorless powder (81%, 59 mg), mp 213–214 °C. <sup>1</sup>H NMR (400 MHz, DMSO-*d*<sub>6</sub>): δ 9.43 (s, 1H), 7.21 – 7.18 (m, 3H), 7.13 – 7.02 (m, 7H), 4.88 (s, 1H), 3.73 – 3.71 (m, 4H), 3.65 – 3.61 (m, 4H). <sup>13</sup>C{<sup>1</sup>H} NMR (100 MHz, DMSO-*d*<sub>6</sub>): δ 188.7, 159.2, 137.1, 130.1, 128.7, 128.6, 128.5, 128.1, 128.0, 127.3, 118.4, 75.2, 73.5, 65.5, 55.0, 50.5. HRMS (ESI) *m/z*: [M + H]<sup>+</sup> calcd. for C<sub>22</sub>H<sub>21</sub>N<sub>2</sub>O<sub>2</sub>S<sup>+</sup> 377.1318; found 377.1320.

**(4*RS*,5*SR*)-5-Formyl-5-(4-methoxyphenyl)-2-morpholino-4-phenyl-4,5-dihydrothiophene-3-carbonitrile (3ac)**

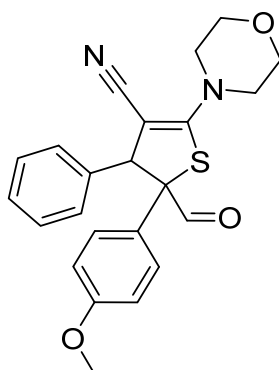

Compound **3ac** was obtained according to the general procedure from 2-(morpholine-4-carbonothioyl)-3-phenylacrylonitrile (**1a**) (50 mg, 1.0 equiv, 0.19 mmol), 1-sulfonyl-1,2,3-triazole **2c** (70 mg, 1.1 equiv, 0.21 mmol), Rh<sub>2</sub>(Piv)<sub>4</sub> (2.6 mg), chloroform (1 mL), 80 °C, reaction time is 13 h. The purification of the crude product by column chromatography on SiO<sub>2</sub> (DCM/EtOAc, gradient 25:0 to 24:1) afforded **3ac** as a colorless gum. It was triturated with *n*-hexane and centrifugated afforded **3ac** as a colorless powder (85%, 53 mg), mp 174–179 °C. <sup>1</sup>H NMR (400 MHz, CDCl<sub>3</sub>-*d*): δ 9.35 (s, 1H), 7.10 – 7.06 (m, 3H), 7.01 – 6.99 (m, 2H), 6.86 (d, *J* = 8.8 Hz, 2H), 6.64 (d, *J* = 8.8 Hz, 2H), 4.84 (s, 1H), 3.82 – 3.77 (m, 4H), 3.73 – 3.62 (m, 7H). <sup>13</sup>C{<sup>1</sup>H} NMR

(100 MHz, CDCl<sub>3</sub>-*d*):  $\delta$  188.1, 159.8, 159.3, 136.8, 129.5, 128.9, 128.2, 127.6, 121.6, 118.3, 114.2, 77.4, 73.9, 66.4, 55.9, 55.3, 50.9. HRMS (ESI) *m/z*: [M + H]<sup>+</sup> calcd. for C<sub>23</sub>H<sub>23</sub>N<sub>2</sub>O<sub>3</sub>S<sup>+</sup> 407.1424; found 407.1425.

**(4*RS*,5*SR*)-5-Formyl-2-morpholino-5-phenyl-4-(*p*-tolyl)-4,5-dihydrothiophene-3-carbonitrile (3ba)**

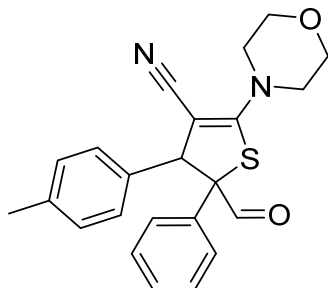

Compound **3ba** was obtained according to the general procedure from 2-(morpholine-4-carbonothioyl)-3-(*p*-tolyl)acrylonitrile (**1b**) (40 mg, 1.0 equiv, 0.15 mmol), 1-sulfonyl-1,2,3-triazole **2a** (48 mg, 1.1 equiv, 0.16 mmol), Rh<sub>2</sub>(Piv)<sub>4</sub> (2.0 mg), chloroform (1 mL), 70 °C, reaction is time 16 h. The purification of the crude product by column chromatography on SiO<sub>2</sub> (PE/EtOAc, gradient 50:0 to 35:15) afforded **3ba** as a colorless powder (70%, 57 mg), mp 228–229 °C. <sup>1</sup>H NMR (400 MHz, DMSO-*d*<sub>6</sub>):  $\delta$  9.41 (s, 1H), 7.23 – 7.17 (m, 3H), 7.05 – 7.02 (m, 4H), 6.90 (d, *J* = 7.6 Hz, 2H), 4.85 (s, 1H), 3.71 (br. s, 4H), 3.66 – 3.61 (m, 4H). <sup>13</sup>C{<sup>1</sup>H} NMR (100 MHz, DMSO-*d*<sub>6</sub>):  $\delta$  188.8, 159.0, 136.3, 134.1, 130.2, 128.7, 128.6, 128.6, 128.5, 128.2, 118.4, 75.6, 73.5, 65.5, 54.6, 50.5, 20.5. HRMS (ESI) *m/z*: [M + H]<sup>+</sup> calcd. for C<sub>23</sub>H<sub>23</sub>N<sub>2</sub>O<sub>2</sub>S<sup>+</sup> 391.1475; found 391.1473.

**(4*RS*,5*SR*)-4-(4-Chlorophenyl)-5-formyl-2-morpholino-5-phenyl-4,5-dihydrothiophene-3-carbonitrile (3ca)**

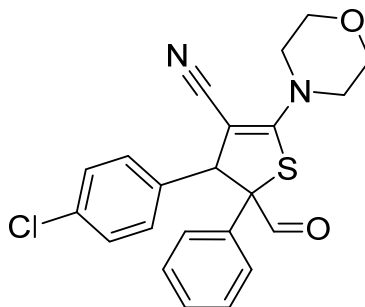

Compound **3ca** was obtained according to the general procedure from 3-(4-chlorophenyl)-2-(morpholine-4-carbonothioyl)acrylonitrile (**1c**) (50 mg, 1.0 equiv, 0.17 mmol), 1-sulfonyl-1,2,3-triazole **2a** (56 mg, 1.1 equiv, 0.19 mmol), Rh<sub>2</sub>(Piv)<sub>4</sub> (2.3 mg), chloroform (1 mL), 80 °C, reaction time is 13 h. The purification of the crude product by column chromatography on SiO<sub>2</sub> (PE/EtOAc,

gradient 50:0 to 30:20) afforded **3ca** as a colorless powder (64%, 45 mg), mp 235–236 °C. <sup>1</sup>H NMR (400 MHz, DMSO-*d*<sub>6</sub>): δ 9.42 (s, 1H), 7.25 – 7.22 (m, 3H), 7.16 (br. s, 4H), 7.06 – 7.03 (m, 2H), 4.94 (s, 1H), 3.73 – 3.70 (m, 4H), 3.65 – 3.62 (m, 4H). <sup>13</sup>C{<sup>1</sup>H} NMR (100 MHz, DMSO-*d*<sub>6</sub>): δ 188.5, 159.3, 136.3, 131.9, 130.6, 130.0, 128.8, 128.7, 128.1, 127.9, 118.2, 74.7, 73.3, 65.5, 54.2, 50.5. HRMS (ESI) *m/z*: [M + H]<sup>+</sup> calcd. for C<sub>22</sub>H<sub>20</sub>ClN<sub>2</sub>O<sub>2</sub>S<sup>+</sup> 411.0928; found 411.0929.

**(E)-5-Formyl-2-morpholino-5-phenyl-4-styryl-4,5-dihydrothiophene-3-carbonitrile (3da)**

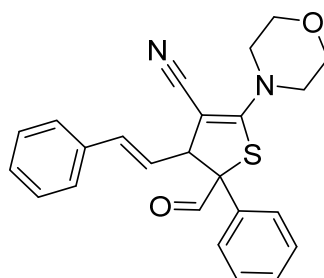

Compound **3da** was obtained according to the general procedure from 2-(morpholine-4-carbonothioyl)-5-phenylpenta-2,4-dienenitrile (**1d**) (70 mg, 1.0 equiv, 0.25 mmol), 1-sulfonyl-1,2,3-triazole **2a** (81 mg, 1.1 equiv, 0.27 mmol), Rh<sub>2</sub>(Piv)<sub>4</sub> (3.3 mg), chloroform (1.5 mL), 80 °C, reaction time is 13 h. The purification of the crude product by column chromatography on neutral Al<sub>2</sub>O<sub>3</sub> (PE/EtOAc, gradient 50:0 to 35:15) with subsequent centrifugation with *n*-hexane afforded **3da** as a colorless powder (68%, 48 mg), mp 121–123 °C. <sup>1</sup>H NMR (400 MHz, DMSO-*d*<sub>6</sub>): δ 9.39 (s, 1H), 7.41 (t, *J* = 7.4 Hz, 2H), 7.33 (t, *J* = 7.3 Hz, 1H), 7.27 – 7.17 (m, 7H), 6.49 (d, *J* = 15.7 Hz, 1H), 5.86 (dd, *J* = 15.7, 9.1 Hz, 1H), 4.47 (d, *J* = 9.0 Hz, 1H), 3.70 – 3.68 (m, 4H), 3.60 – 3.59 (m, 4H). <sup>13</sup>C{<sup>1</sup>H} NMR (100 MHz, DMSO-*d*<sub>6</sub>): δ 189.6, 158.7, 136.2, 131.9, 130.5, 129.1, 128.8, 128.5, 128.4, 127.6, 126.2, 124.9, 118.4, 73.1, 72.5, 65.4, 53.2, 50.4. HRMS (ESI) *m/z*: [M + H]<sup>+</sup> calcd. for C<sub>24</sub>H<sub>23</sub>N<sub>2</sub>O<sub>2</sub>S<sup>+</sup> 403.1475; found 403.1470.

**4-Methyl-N-((5-morpholino-2,3-diphenyl-4-(4-phenylthiazol-2-yl)-2,3-dihydrothiophen-2-yl)methylene)benzenesulfonamide (3ga)**

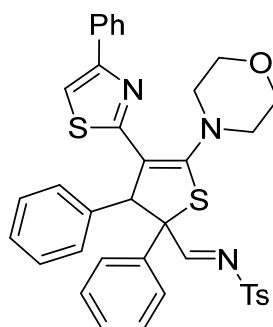

Compound **3ga** was obtained according to the general procedure from 1-morpholino-3-phenyl-2-(4-phenylthiazol-2-yl)prop-2-ene-1-thione (**1g**) (44 mg, 1.0 equiv, 0.11 mmol), 1-sulfonyl-1,2,3-

triazole **2a** (40 mg, 1.2 equiv, 0.13 mmol), Rh<sub>2</sub>(Piv)<sub>4</sub> (1.6 mg), chloroform (1.0 mL), 80 °C, reaction time is 14 h. The purification of the crude product by column chromatography on SiO<sub>2</sub> (PE/EtOAc, gradient 50:0 to 40:10) with subsequent centrifugation with cold diethyl ether afforded **3ga** as a colorless powder (53%, 30 mg), mp 216–218 °C. <sup>1</sup>H NMR (400 MHz, DMSO-*d*<sub>6</sub>): δ 8.41 (s, 1H), 7.99 (s, 1H), 7.88 (d, *J* = 7.6 Hz, 2H), 7.54 (d, *J* = 7.9 Hz, 2H), 7.41 (t, *J* = 7.5 Hz, 2H), 7.33 – 7.19 (m, 8H), 7.12 (d, *J* = 6.7 Hz, 2H), 7.04 – 6.94 (m, 3H), 5.45 (s, 1H), 2.74 – 2.70 (m, 2H), 2.35 (s, 3H), 2.24 – 2.20 (m, 2H). <sup>13</sup>C{<sup>1</sup>H} NMR (100 MHz, DMSO-*d*<sub>6</sub>): δ 167.4, 158.5, 152.6, 149.0, 144.7, 136.4, 134.3, 134.1, 132.3, 129.9, 129.0, 128.7, 128.6, 128.4, 128.0, 127.9, 127.7, 127.3, 126.9, 126.8, 125.9, 114.2, 70.1, 65.7, 55.9, 51.4, 21.0. HRMS (ESI) *m/z*: [M + H]<sup>+</sup> calcd. for C<sub>37</sub>H<sub>34</sub>N<sub>3</sub>O<sub>3</sub>S<sub>3</sub><sup>+</sup> 664.1757; found 664.1768.

#### 4-Acetyl-5-morpholino-2,3-diphenyl-2,3-dihydrothiophene-2-carbaldehyde (**3wa**)

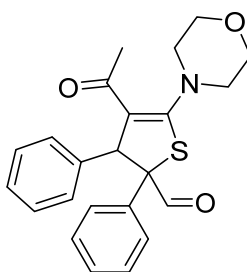

Compound **3wa** was obtained according to the general procedure from 3-(morpholine-4-carbonothioyl)-4-phenylbut-3-en-2-one (**1w**) (50 mg, 1.0 equiv, 0.18 mmol), 1-sulfonyl-1,2,3-triazole **2a** (65 mg, 1.2 equiv, 0.22 mmol), Rh<sub>2</sub>(Piv)<sub>4</sub> (2.6 mg), chloroform (2.0 mL), 80 °C, reaction time is 14 h. The purification of the crude product by column chromatography on SiO<sub>2</sub> (PE/EtOAc, gradient 100:0 to 40:60) with subsequent flash chromatography on SiO<sub>2</sub> (DCM/EtOAc, gradient 50:0 to 25:25) afforded **3wa** as a pale-yellow gum (52%, 37 mg). <sup>1</sup>H NMR (400 MHz, CDCl<sub>3</sub>-*d*): δ 9.42 (s, 1H), 7.14 – 7.10 (m, 3H), 7.06 - 6.97 (m, 7H), 5.10 (s, 1H), 3.96 – 3.90 (m, 2H), 3.85 – 3.79 (m, 2H), 3.70 – 3.65 (m, 2H), 3.45 – 3.40 (m, 2H), 2.06 (m, 3H). <sup>13</sup>C{<sup>1</sup>H} NMR (100 MHz, CDCl<sub>3</sub>-*d*): δ 189.1, 188.6, 162.4, 137.9, 130.4, 129.1, 128.7, 128.7, 128.3, 128.1, 127.2, 112.4, 73.9, 66.9, 57.0, 53.5, 30.4. HRMS (ESI) *m/z*: [M + H]<sup>+</sup> calcd. for C<sub>23</sub>H<sub>24</sub>NO<sub>3</sub>S<sup>+</sup> 394.1471; found 394.1475.

#### (4*RS*,5*RS*)-2-Morpholino-6-oxo-4-phenyl-1-thiaspiro[4.5]dec-2-ene-3-carbonitrile (**3ad**)

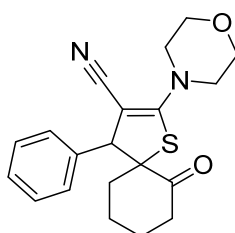

Compound **3ad** was obtained according to the general procedure from 2-(morpholine-4-carbonothioyl)-3-phenylacrylonitrile (**1a**) (50 mg, 1.0 equiv, 0.19 mmol), 1-sulfonyl-1,2,3-triazole **2d** (79 mg, 1.4 equiv, 0.27 mmol), Rh<sub>2</sub>(Piv)<sub>4</sub> (3.3 mg), chloroform (1.5 mL), 80 °C, reaction time is 14 h. The purification of the crude product by column chromatography on SiO<sub>2</sub> (DCM/EtOAc, gradient 25:0 to 22.5:2.5) with subsequent flash chromatography on neutral Al<sub>2</sub>O<sub>3</sub> (PE/EtOAc, gradient 100:0 to 85:15) afforded **3ad** as a colorless powder (69%, 48 mg), mp 164–166 °C. <sup>1</sup>H NMR (600 MHz, CD<sub>3</sub>CN-*d*<sub>3</sub>): δ 7.38 (t, *J* = 7.3 Hz, 2H), 7.34 – 7.31 (m, 3H), 4.70 (s, 1H), 3.69 (t, *J* = 4.9 Hz, 4H), 3.59 – 3.52 (m, 4H), 3.20 (td, *J* = 14.2, 6.3 Hz, 1H), 2.36 – 2.32 (m, 1H), 2.00 – 1.95 (m, 1H), 1.74 – 1.69 (m, 1H), 1.61 – 1.53 (m, 2H), 1.45 – 1.35 (m, 2H). <sup>13</sup>C{<sup>1</sup>H} NMR (150 MHz, CD<sub>3</sub>CN-*d*<sub>3</sub>): δ 205.5, 162.5, 138.6, 130.2, 129.5, 128.9, 119.8, 76.7, 67.8, 66.9, 56.8, 51.5, 37.7, 37.3, 27.2, 25.1. HRMS (ESI) *m/z*: [M + H]<sup>+</sup> calcd. for C<sub>20</sub>H<sub>23</sub>N<sub>2</sub>O<sub>2</sub>S<sup>+</sup> 355.1475; found 355.1473.

**(2*RS*,3*SR*)-(E)-N-(1-(2-Acetyl-4-cyano-5-morpholino-3-phenyl-2,3-dihydrothiophen-2-yl)ethylidene)-4-methylbenzenesulfonamide (**3ae**)**

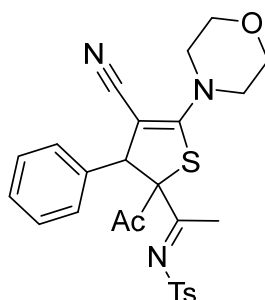

Compound **3ae** was obtained according to the general procedure from 2-(morpholine-4-carbonothioyl)-3-phenylacrylonitrile (**1a**) (40 mg, 1.0 equiv, 0.15 mmol), 1-sulfonyl-1,2,3-triazole **2e** (65 mg, 1.5 equiv, 0.23 mmol), Rh<sub>2</sub>(Piv)<sub>4</sub> (2.8 mg, 2 mol %), chloroform (1 mL), 80 °C, reaction time is 14 h. The purification of the crude product by column chromatography on SiO<sub>2</sub> (PE/EtOAc, gradient 80:20 to 50:50) afforded **3ae** as a pale-yellow gum. It was triturated with *n*-hexane until a powder was obtained and centrifugated with cold diethyl ether afforded **3ae** as a colorless powder (78%, 62 mg), mp 184–185 °C. <sup>1</sup>H NMR (400 MHz, CDCl<sub>3</sub>-*d*): δ 7.70 (d, *J* = 8.1 Hz, 2H), 7.34 (d, *J* = 8.1 Hz, 2H), 7.30 – 7.21 (m, 5H), 4.92 (s, 1H), 3.73 – 3.67 (m, 4H), 3.58 – 3.48 (m, 4H), 2.47 (s, 3H), 2.30 (s, 3H), 2.00 (s, 3H). <sup>13</sup>C{<sup>1</sup>H} NMR (100 MHz, CDCl<sub>3</sub>-*d*): δ 195.7, 180.4, 159.1, 144.6, 136.7, 136.7, 129.8, 129.1, 128.8, 128.5, 127.4, 118.0, 81.7, 66.2, 55.5, 50.6, 25.0, 21.9, 21.8. HRMS (ESI) *m/z*: [M + H]<sup>+</sup> calcd. for C<sub>26</sub>H<sub>28</sub>N<sub>3</sub>O<sub>4</sub>S<sub>2</sub><sup>+</sup> 510.1516; found 510.1520.

***N*-((4-Cyano-3,3-dimethyl-5-morpholino-2-phenyl-2,3-dihydrothiophen-2-yl)methylene)-4-methylbenzenesulfonamide (3ha)**

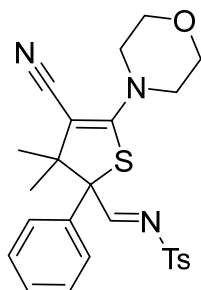

Compound **3ha** was obtained according to the general procedure from 3-methyl-2-(morpholine-4-carbonothioyl)but-2-enenitrile (**1h**) (40 mg, 1.0 equiv, 0.19 mmol), 1-sulfonyl-1,2,3-triazole **2a** (56 mg, 1.1 equiv, 0.21 mmol), Rh<sub>2</sub>(Piv)<sub>4</sub> (2.3 mg), chloroform (1 mL), 80 °C, reaction time is 13 h. The purification of the crude product by column chromatography on SiO<sub>2</sub> (PE/EtOAc, gradient 50:0 to 30:20) afforded **3ha** as a pale-yellow powder (68%, 63 mg), mp 173–175 °C. <sup>1</sup>H NMR (400 MHz, CDCl<sub>3</sub>-*d*): δ 8.65 (s, 1H), 7.81 (d, *J* = 8.1, 2H), 7.39 – 7.34 (m, 7H), 3.71 – 3.62 (m, 4H), 3.53 – 3.48 (m, 2H), 3.45 – 3.49 (m, 2H), 2.44 (s, 3H), 1.38 (s, 3H), 0.88 (s, 3H). <sup>13</sup>C{<sup>1</sup>H} NMR (100 MHz, CDCl<sub>3</sub>-*d*): δ 169.9, 157.8, 145.0, 135.0, 131.4, 130.0, 129.2, 128.9, 128.6, 128.1, 118.4, 82.2, 72.2, 66.2, 52.2, 50.8, 25.7, 21.8, 21.4. HRMS (ESI) *m/z*: [M + H]<sup>+</sup> calcd. for C<sub>25</sub>H<sub>28</sub>N<sub>3</sub>O<sub>3</sub>S<sub>2</sub><sup>+</sup> 482.1566; found 482.1569.

***N*-((4-Cyano-3-morpholino-1-phenyl-2-thiaspiro[4.4]non-3-en-1-yl)methylene)-4-methylbenzenesulfonamide (3ia)**

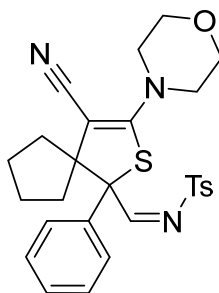

Compound **3ia** was obtained according to the general procedure from 2-cyclopentylidene-3-morpholino-3-thioxopropanenitrile (**1i**) (40 mg, 1.0 equiv, 0.17 mmol), 1-sulfonyl-1,2,3-triazole **2a** (56 mg, 1.1 equiv, 0.19 mmol), Rh<sub>2</sub>(Piv)<sub>4</sub> (2.3 mg), chloroform (1 mL), 80 °C, reaction time is 10 h. The purification of the crude product by column chromatography on SiO<sub>2</sub> (DCM/EtOAc, gradient 25:0 to 24.5:0.5) afforded **3ia** as a pale-yellow powder (78%, 67 mg), mp 183–184 °C. <sup>1</sup>H NMR (400 MHz, CDCl<sub>3</sub>-*d*): δ 8.42 (s, 1H), 7.89 (d, *J* = 8.1 Hz, 2H), 7.38 – 7.37 (m, 7H), 3.59 – 3.49 (m, 4H), 3.39 – 3.34 (m, 2H), 3.25 – 3.20 (m, 2H), 2.57 – 2.50 (m, 1H), 2.45 (s, 3H), 1.80

– 1.63 (m, 4H), 1.52 – 1.38 (m, 2H), 0.86 – 0.81 (m, 1H).  $^{13}\text{C}\{^1\text{H}\}$  NMR (100 MHz,  $\text{CDCl}_3-d$ ):  $\delta$  167.2, 157.0, 145.0, 135.3, 131.5, 130.0, 129.6, 129.1, 129.0, 128.2, 118.6, 85.4, 73.2, 66.2, 62.4, 50.8, 38.6, 31.7, 25.5, 23.9, 21.8. HRMS (ESI)  $m/z$ :  $[\text{M} + \text{H}]^+$  calcd. for  $\text{C}_{27}\text{H}_{30}\text{N}_3\text{O}_3\text{S}_2^+$  508.1723; found 508.1719.

***N*-((4-Cyano-3-morpholino-1-phenyl-2-thiaspiro[4.5]dec-3-en-1-yl)methylene)-4-methylbenzenesulfonamide (3ja)**

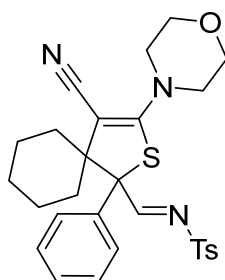

Compound **3ja** was obtained according to the general procedure from 2-cyclohexylidene-3-morpholino-3-thioxopropanenitrile (**1j**) (40 mg, 1.0 equiv, 0.16 mmol), 1-sulfonyl-1,2,3-triazole **2a** (53 mg, 1.1 equiv, 0.17 mmol),  $\text{Rh}_2(\text{Piv})_4$  (2.2 mg), chloroform (1 mL), 80 °C, reaction time is 12 h. The purification of the crude product by column chromatography on  $\text{SiO}_2$  (DCM/EtOAc, gradient 24.5:0.5 to 24:1) afforded **3ja** as a yellow gum (81%, 67 mg), which solidified within 48 h when stored at room temperature, mp 187–189 °C.  $^1\text{H}$  NMR (400 MHz,  $\text{CDCl}_3-d$ ):  $\delta$  8.57 (s, 1H), 7.90 (d,  $J = 8.2$  Hz, 2H), 7.42 – 7.35 (m, 7H), 3.68 – 3.63 (m, 2H), 3.61 – 3.56 (m, 2H), 3.54 – 3.48 (m, 2H), 3.33 – 3.28 (m, 2H), 2.53 – 2.45 (m, 4H), 2.24 – 2.12 (m, 1H), 2.01 (d,  $J = 12.5$  Hz, 1H), 1.65 – 1.50 (m, 4H), 1.41 (td,  $J = 13.1, 4.7$  Hz, 1H), 0.92 – 0.82 (m, 1H), 0.77 – 0.70 (m, 1H).  $^{13}\text{C}\{^1\text{H}\}$  NMR (100 MHz,  $\text{CDCl}_3-d$ ):  $\delta$  168.8, 161.1, 145.0, 135.0, 131.4, 130.0, 129.7, 129.4, 128.6, 128.2, 120.1, 80.9, 74.4, 66.4, 54.2, 51.1, 35.0, 28.8, 25.3, 22.2, 22.2, 21.8. HRMS (ESI)  $m/z$ :  $[\text{M} + \text{H}]^+$  calcd. for  $\text{C}_{28}\text{H}_{32}\text{N}_3\text{O}_3\text{S}_2^+$  522.1879; found 522.1874.

***N*-((4-Cyano-3-morpholino-1-phenyl-8-oxa-2-thiaspiro[4.5]dec-3-en-1-yl)methylene)-4-methylbenzenesulfonamide (3ka)**

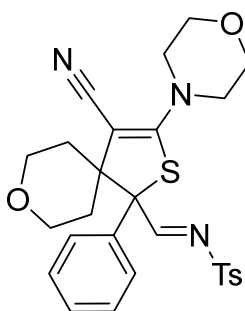



Compound **3ka** was obtained according to the general procedure from 3-morpholino-2-(tetrahydro-4*H*-pyran-4-ylidene)-3-thioxopropanenitrile (**1k**) (40 mg, 1.0 equiv, 0.16 mmol), 1-sulfonyl-1,2,3-triazole **2a** (52 mg, 1.1 equiv, 0.17 mmol), Rh<sub>2</sub>(Piv)<sub>4</sub> (2.1 mg), chloroform (1 mL), 80 °C, reaction time is 9 h. The purification of the crude product by column chromatography on SiO<sub>2</sub> (PE/EtOAc, gradient 30:20 to 15:35) afforded **3ka** as a pale-yellow powder (93%, 77 mg), mp 184–185 °C. <sup>1</sup>H NMR (400 MHz, CDCl<sub>3</sub>-*d*): δ 8.43 (s, 1H), 7.94 (d, *J* = 8.1 Hz, 2H), 7.44 – 7.40 (m, 5H), 7.34 – 7.33 (m, 2H), 4.19 (t, *J* = 11.6, 1H), 3.80 (dd, *J* = 12.3, 5.6 Hz, 1H), 3.75 – 3.65 (m, 2H), 3.62 – 3.56 (m, 2H), 3.53 – 3.45 (m, 4H), 3.29 – 3.23 (m, 2H), 2.66 (d, *J* = 13.2, 1H), 2.48 (s, 3H), 1.86 – 1.73 (m, 2H), 1.36 – 1.29 (m, 1H). <sup>13</sup>C{<sup>1</sup>H} NMR (100 MHz, CDCl<sub>3</sub>-*d*): δ 166.3, 160.6, 145.1, 135.0, 130.6, 130.0, 129.9, 129.6, 129.1, 128.3, 119.7, 79.9, 74.4, 66.3, 64.2, 64.1, 51.2, 35.2, 29.8, 28.7, 21.8. HRMS (ESI) *m/z*: [M + H]<sup>+</sup> calcd. for C<sub>27</sub>H<sub>30</sub>N<sub>3</sub>O<sub>4</sub>S<sub>2</sub><sup>+</sup> 524.1672; found 524.1669.

***N*-((4-Cyano-3-morpholino-1-phenyl-2-thiaspiro[4.6]undec-3-en-1-yl)methylene)-4-methylbenzenesulfonamide (3la)**

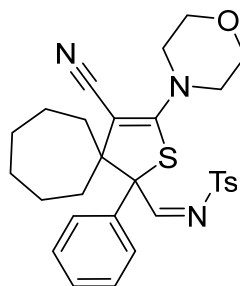

Compound **3la** was obtained according to the general procedure from 2-cycloheptylidene-3-morpholino-3-thioxopropanenitrile (**1l**) (40 mg, 1.0 equiv, 0.15 mmol), 1-sulfonyl-1,2,3-triazole **2a** (50 mg, 1.1 equiv, 0.17 mmol), Rh<sub>2</sub>(Piv)<sub>4</sub> (2.0 mg), chloroform (1 mL), 80 °C, reaction time is 12 h. The purification of the crude product by column chromatography on SiO<sub>2</sub> (PE/EtOAc, gradient 50:0 to 30:20) afforded **3la** as a pale-yellow powder (78%, 63 mg), mp 160–162 °C. <sup>1</sup>H NMR (400 MHz, CDCl<sub>3</sub>-*d*): δ 8.62 (s, 1H), 7.83 (d, *J* = 8.1 Hz, 2H), 7.44 – 7.34 (m, 7H), 3.69 – 3.59 (m, 4H), 3.53 – 3.48 (m, 2H), 3.38 – 3.33 (m, 2H), 2.51 – 2.42 (m, 4H), 1.90 – 1.82 (m, 2H), 1.76 – 1.68 (m, 2H), 1.61 – 1.47 (m, 2H), 1.25 – 1.08 (m, 4H), 0.37 – 0.29 (m, 1H). <sup>13</sup>C{<sup>1</sup>H} NMR (100 MHz, CDCl<sub>3</sub>-*d*): δ 170.1, 159.0, 144.9, 135.0, 131.5, 130.0, 129.5, 129.4, 128.6, 128.2, 119.3, 84.1, 74.0, 66.4, 58.4, 50.9, 35.6, 34.1, 31.1, 30.9, 24.9, 22.9, 21.8. HRMS (ESI) *m/z*: [M + H]<sup>+</sup> calcd. for C<sub>29</sub>H<sub>34</sub>N<sub>3</sub>O<sub>3</sub>S<sub>2</sub><sup>+</sup> 536.2036; found 536.2030.

***N*-((4-Cyano-1-phenyl-3-(piperidin-1-yl)-2-thiaspiro[4.5]dec-3-en-1-yl)methylene)-4-methylbenzenesulfonamide (3ma)**

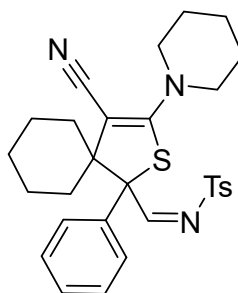

Compound **3ma** was obtained according to the general procedure from 2-cyclohexylidene-3-(piperidin-1-yl)-3-thioxopropanenitrile (**1m**) (40 mg, 1.0 equiv, 0.16 mmol), 1-sulfonyl-1,2,3-triazole **2a** (53 mg, 1.1 equiv, 0.18 mmol), Rh<sub>2</sub>(Piv)<sub>4</sub> (2.2 mg), chloroform (1 mL), 80 °C, reaction time is 12 h. The purification of the crude product by column chromatography on SiO<sub>2</sub> (PE/EtOAc, gradient 50:0 to 35:15) with subsequent centrifugation with cold diethyl ether afforded **3ma** as a pale-yellow powder (65%, 55 mg), mp 174–176 °C. <sup>1</sup>H NMR (400 MHz, CDCl<sub>3</sub>-*d*): δ 8.58 (s, 1H), 7.86 (d, *J* = 8.1 Hz, 2H), 7.35 – 7.34 (m, 7H), 3.51 – 3.46 (m, 2H), 3.36 – 3.31 (m, 2H), 2.44 (s, 3H), 2.23 – 2.13 (m, 1H), 1.95 (d, *J* = 13.2, 1H), 1.61 – 1.37 (m, 12H), 0.87 – 0.81 (m, 1H), 0.72 – 0.65 (m, 1H). <sup>13</sup>C {1H} NMR (100 MHz, CDCl<sub>3</sub>-*d*): δ 169.9, 161.2, 144.7, 135.0, 131.7, 129.9, 129.8, 129.1, 128.5, 128.2, 120.8, 77.8, 73.8, 54.1, 52.7, 35.2, 29.1, 26.1, 25.5, 24.2, 22.2, 21.8. HRMS (ESI) *m/z*: [M + H]<sup>+</sup> calcd. for C<sub>29</sub>H<sub>34</sub>N<sub>3</sub>O<sub>2</sub>S<sub>2</sub><sup>+</sup> 520.2087; found 520.2085.

***N*-((4-Cyano-1-phenyl-3-(pyrrolidin-1-yl)-2-thiaspiro[4.5]dec-3-en-1-yl)methylene)-4-methylbenzenesulfonamide (3na)**

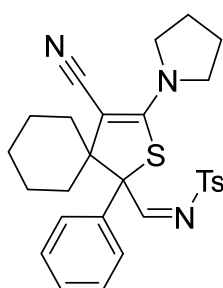

Compound **3na** was obtained according to the general procedure from 2-cyclohexylidene-3-(pyrrolidin-1-yl)-3-thioxopropanenitrile (**1n**) (40 mg, 1.0 equiv, 0.17 mmol), 1-sulfonyl-1,2,3-triazole **2a** (56 mg, 1.1 equiv, 0.19 mmol), Rh<sub>2</sub>(Piv)<sub>4</sub> (2.3 mg), chloroform (1 mL), 80 °C, reaction time is 12 h. The purification of the crude product by column chromatography on SiO<sub>2</sub> (PE/EtOAc, gradient 50:0 to 20:30) with subsequent centrifugation with cold diethyl ether afforded **3na** as a yellow powder (70%, 60 mg), mp 182–183 °C. <sup>1</sup>H NMR (400 MHz, CDCl<sub>3</sub>-*d*): δ 8.73 (s, 1H), 7.82 (d, *J* = 7.9 Hz, 2H), 7.37 – 7.32 (m, 7H), 3.54 – 3.47 (m, 4H), 2.43 (s, 3H), 2.27 – 2.15 (m, 2H),

1.93 – 1.90 (m, 4H), 1.66 – 1.53 (m, 4H), 1.45 – 1.40 (m, 2H), 0.87 – 0.78 (m, 1H), 0.67 – 0.60 (m, 1H).  $^{13}\text{C}\{^1\text{H}\}$  NMR (100 MHz,  $\text{CDCl}_3$ -*d*):  $\delta$  171.4, 157.7, 144.6, 135.2, 131.8, 129.9, 129.0, 128.3, 128.1, 121.9, 75.6, 74.4, 54.3, 51.9, 35.4, 29.8, 25.7, 25.5, 22.1, 22.0, 21.8. HRMS (ESI)  $m/z$ :  $[\text{M} + \text{H}]^+$  calcd. for  $\text{C}_{28}\text{H}_{32}\text{N}_3\text{O}_2\text{S}_2^+$  506.1930; found 506.1929.

***N*-(15-Cyano-14-morpholino-13-thiadispiro[5.0.57.36]pentadeca-8,14-dien-8-yl)-4-methoxybenzenesulfonamide (3jd)**

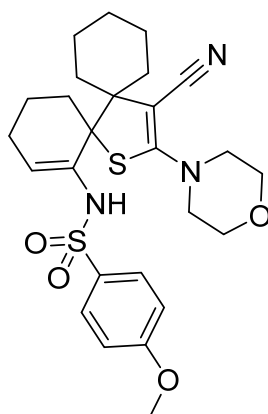

Compound **3jd** was obtained according to the general procedure from 2-cyclohexylidene-3-morpholino-3-thioxopropanenitrile (**1j**) (40 mg, 1.0 equiv, 0.16 mmol), 1-sulfonyl-1,2,3-triazole **2d** (56 mg, 1.2 equiv, 0.19 mmol),  $\text{Rh}_2(\text{Piv})_4$  (2.3 mg), chloroform (1 mL), 80 °C, reaction time is 17 h. The purification of the crude product by column chromatography on  $\text{SiO}_2$  (DCM/EtOAc, gradient 24:1 to 23:2) with subsequent centrifugation with cold diethyl ether afforded **3jd** as a colorless powder (63%, 44 mg), mp 154–155 °C.  $^1\text{H}$  NMR (400 MHz,  $\text{CDCl}_3$ -*d*):  $\delta$  7.85 (d,  $J$  = 8.9 Hz, 2H), 6.98 (d,  $J$  = 8.9 Hz, 2H), 6.71 (s, 1H), 5.59 (dd,  $J$  = 5.8, 2.4 Hz, 1H), 3.89 (s, 3H), 3.81 – 3.71 (m, 5H), 3.63 – 3.58 (m, 2H), 2.30 – 2.19 (m, 1H), 2.15 – 2.07 (m, 2H), 2.03 – 1.45 (m, 11H), 1.36 – 1.26 (m, 2H), 1.18 – 1.06 (m, 1H).  $^{13}\text{C}\{^1\text{H}\}$  NMR (100 MHz,  $\text{CDCl}_3$ -*d*):  $\delta$  167.5, 163.1, 135.2, 132.5, 129.6, 120.9, 115.1, 114.1, 76.9, 66.6, 64.7, 55.8, 54.0, 51.4, 34.4, 32.0, 29.3, 25.7, 24.5, 22.1, 22.1, 21.2. HRMS (ESI)  $m/z$ :  $[\text{M} + \text{H}]^+$  calcd. for  $\text{C}_{26}\text{H}_{34}\text{N}_3\text{O}_4\text{S}_2^+$  516.1985; found 516.1994.

The reaction of 3-amino-2-cyanothioacrylamide **1t** with 1-sulfonyl-1,2,3-triazole **2a** afforded *N*-sulfonylamidine **3ta**

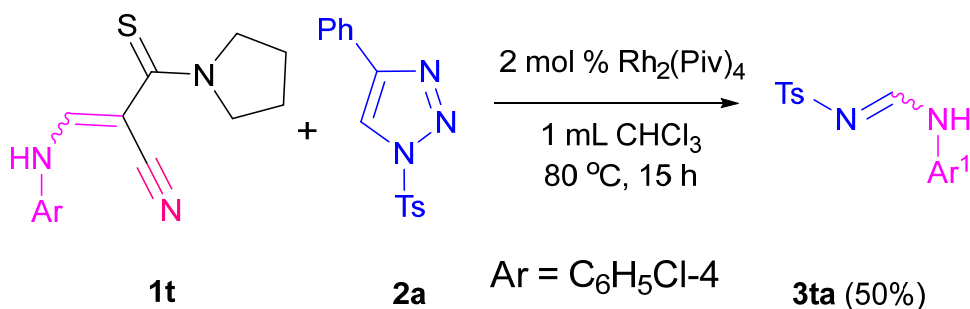

*(Z/E)*-*N*-(4-Chlorophenyl)-*N'*-tosylformimidamide (**3ta**)

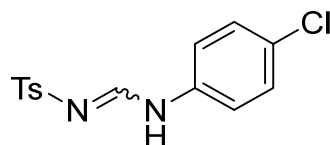

Compound **3ta** was obtained according to the general procedure from 3-((4-chlorophenyl)amino)-2-(pyrrolidine-1-carbonothioyl)acrylonitrile (**1t**) (40 mg, 1.0 equiv, 0.14 mmol), 1-sulfonyl-1,2,3-triazole **2a** (57 mg, 1.4 equiv, 0.19 mmol),  $\text{Rh}_2(\text{Piv})_4$  (2.3 mg), chloroform (1 mL), 80 °C, reaction time is 15 h. The purification of the crude product by column chromatography on  $\text{SiO}_2$  (PE/EtOAc, gradient 50:0 to 30:20) with subsequent centrifugation with cold diethyl ether and then with EtOAc afforded **3ta** as a pale-red powder (50%, 21 mg).  $^1\text{H}$  NMR (400 MHz,  $\text{CDCl}_3$ -*d*):  $\delta$  11.29\* and 10.87 (both d,  $J^* = 12.3$  Hz,  $J = 5.3$  Hz, 1H), 8.74\* and 8.28 (both d,  $J^* = 12.0$  Hz,  $J = 5.0$  Hz, 1H), 7.76 – 7.66 (m, 3H), 7.46 – 7.42 (m, 2H), 7.38 – 7.32 (m, 3H), 2.36 (s, 3H).

## The failure of experiments for the synthesis of dihydrothiophenes

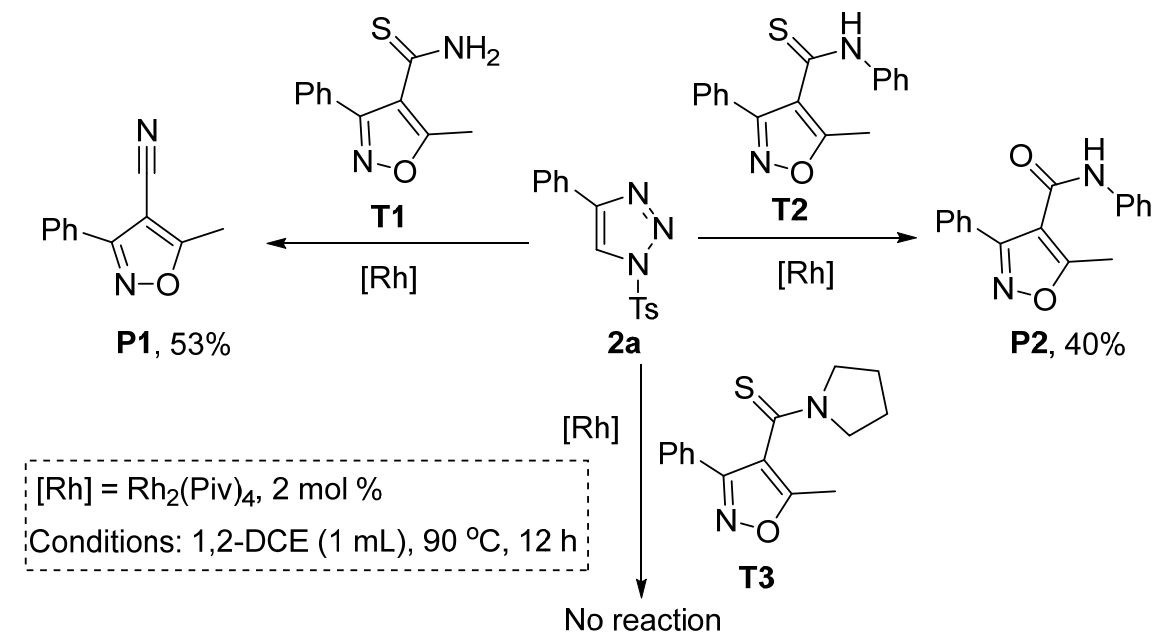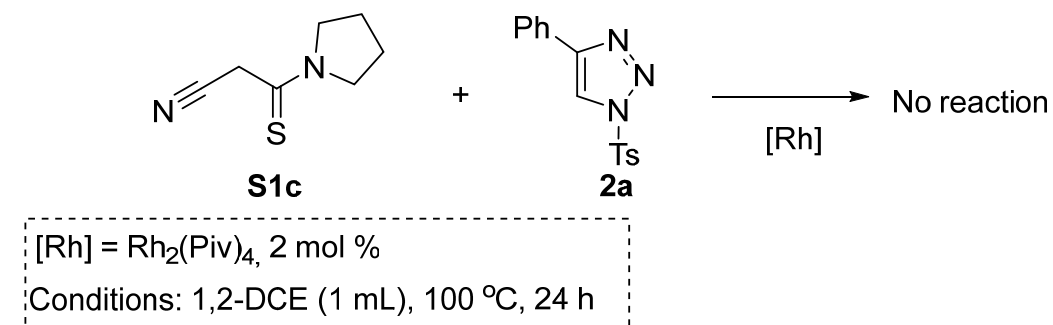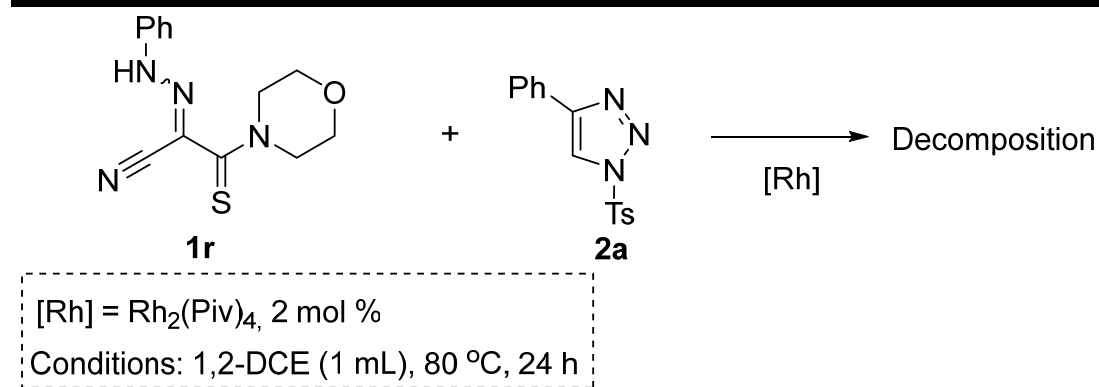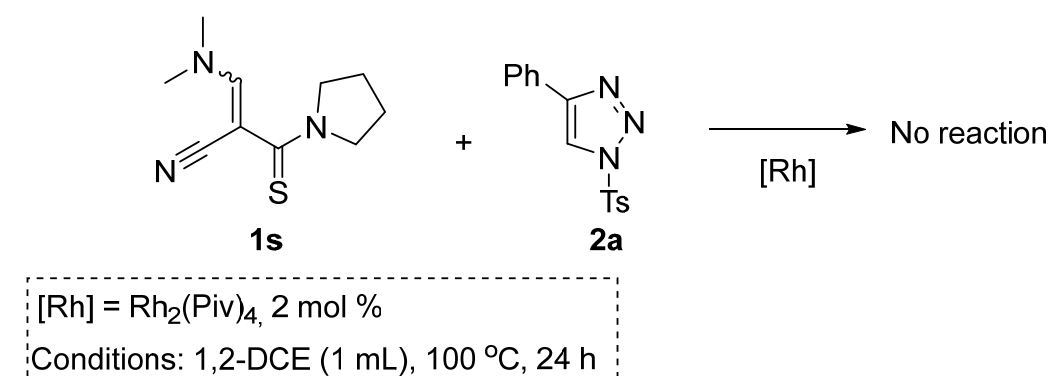

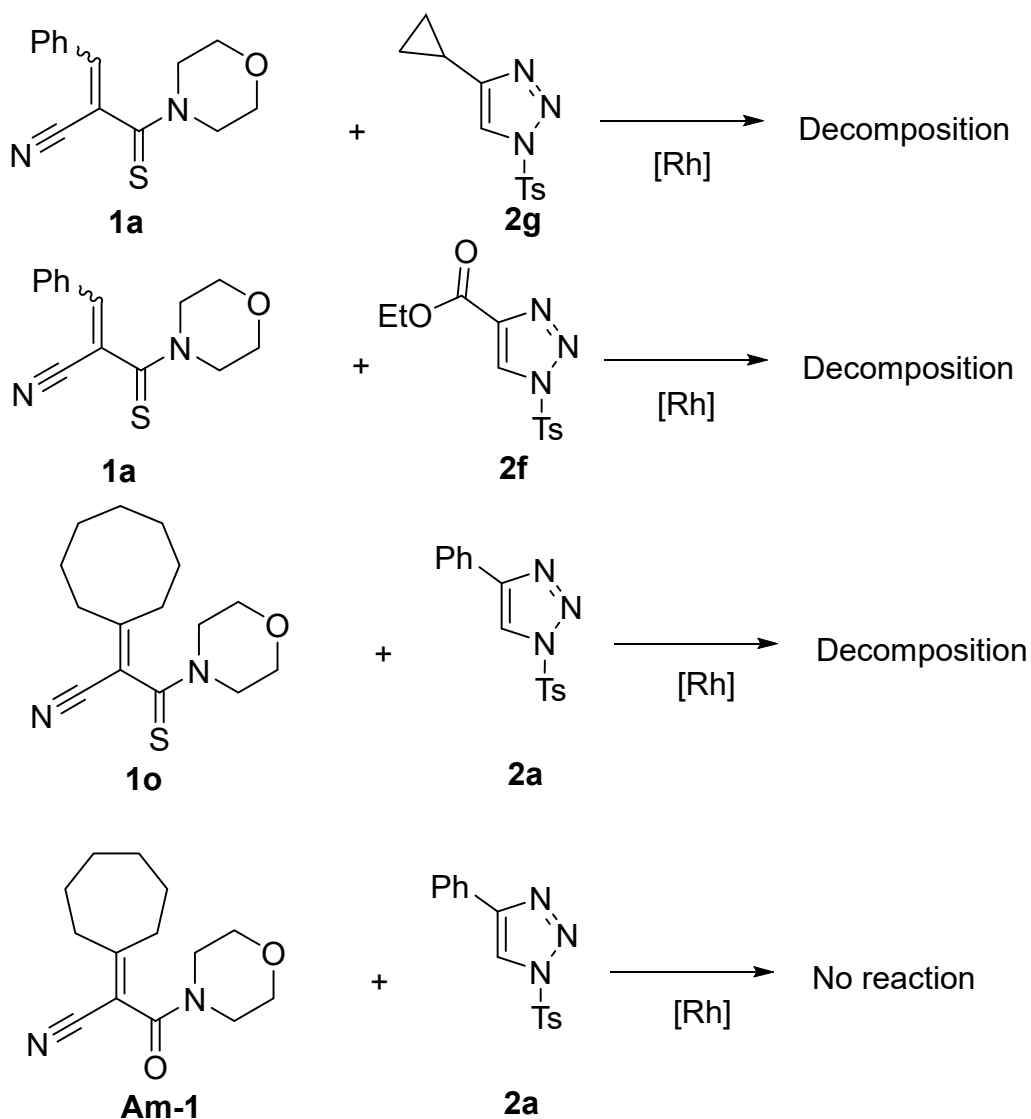

[Rh] = Rh<sub>2</sub>(Piv)<sub>4</sub>, 2.0 mol %  
 Conditions: CHCl<sub>3</sub> (1 mL), 80 °C, 14 h

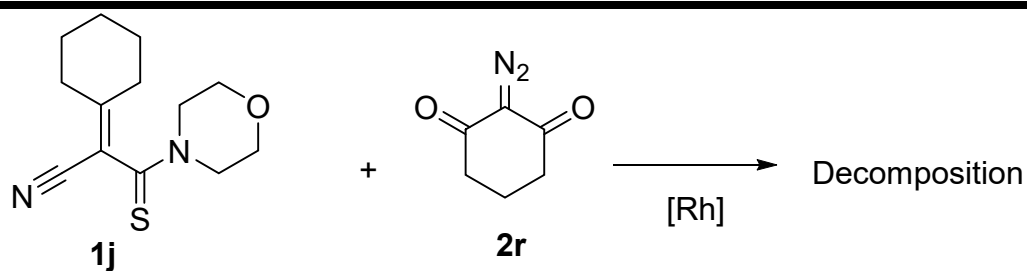

[Rh] = Rh<sub>2</sub>(Piv)<sub>4</sub>, 0.5 mol %  
 Conditions: CHCl<sub>3</sub> (1 mL), rt, 8 h

**Figure S3.** The failure of experiments for the synthesis of dihydrothiophenes

## Optimization study for the reaction of thioamide **1a** with diazo compound **2h**

Table S2. Optimization of the synthesis of dihydrothiophenes **4ah/4'ah**

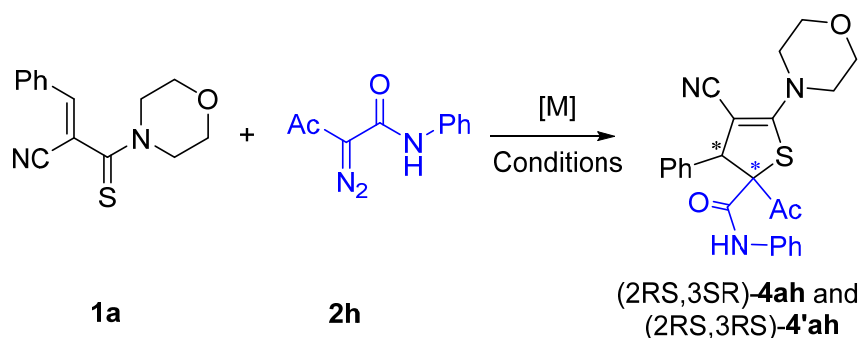

| Entry | Solvent (T, °C)                    | Catalyst (mol %)                                                                     | Time, h | Equiv of <b>2h</b> | Yield <sup>a</sup> <b>4ah/4'ah</b> , % | dr <sup>b</sup> |
|-------|------------------------------------|--------------------------------------------------------------------------------------|---------|--------------------|----------------------------------------|-----------------|
| 1     | CHCl <sub>3</sub> (rt)             | Rh <sub>2</sub> (Piv) <sub>4</sub> (2.0)                                             | 24      | 1.1                | 51/34                                  | 56:44           |
| 2     | CHCl <sub>3</sub> (rt)             | Rh <sub>2</sub> (esp) <sub>2</sub> (0.5)                                             | 24      | 1.1                | 46/28                                  | 56:44           |
| 3     | CHCl <sub>3</sub> (rt)             | Rh <sub>2</sub> (OAc) <sub>4</sub> (0.5) or Rh <sub>2</sub> (Oct) <sub>4</sub> (0.5) | 24      | 1.1                | NR                                     | –               |
| 4     | CHCl <sub>3</sub> (75)             | Rh <sub>2</sub> (OAc) <sub>4</sub> (0.5)                                             | 3.5     | 1.1                | 52/34                                  | 51:49           |
| 5     | CHCl <sub>3</sub> (75)             | Rh <sub>2</sub> (Oct) <sub>4</sub> (0.5)                                             | 3.5     | 1.1                | 57/28                                  | 54:46           |
| 6     | CHCl <sub>3</sub> (rt)             | Rh <sub>2</sub> (Piv) <sub>4</sub> (0.5)                                             | 2       | 1.1                | 45/24                                  | 54:46           |
| 7     | CHCl <sub>3</sub> (rt)             | Rh <sub>2</sub> (Piv) <sub>4</sub> (0.5)                                             | 24      | 1.1                | 49/33                                  | 56:44           |
| 8     | CHCl <sub>3</sub> (rt)             | Rh <sub>2</sub> (Piv) <sub>4</sub> (0.5)                                             | 19      | 2.0                | 55/40                                  | 55:45           |
| 9     | MeCN (rt)                          | Rh <sub>2</sub> (Piv) <sub>4</sub> (0.5)                                             | 19      | 2.0                | Trace                                  | –               |
| 10    | MeCN (75)                          | Rh <sub>2</sub> (Piv) <sub>4</sub> (0.5)                                             | 3.5     | 2.0                | 48/22                                  | 53:47           |
| 11    | C <sub>6</sub> H <sub>6</sub> (rt) | Rh <sub>2</sub> (Piv) <sub>4</sub> (0.5)                                             | 19      | 2.0                | 61/36                                  | 57:43           |
| 12    | CCl <sub>4</sub> (rt)              | Rh <sub>2</sub> (Piv) <sub>4</sub> (0.5)                                             | 19      | 2.0                | 55/35                                  | 50:50           |
| 13    | 1,2-DCE (100)                      | [CuOTf] <sub>2</sub> ·C <sub>6</sub> H <sub>6</sub> (10.0)                           | 24      | 2.0                | 24/52                                  | 28:72           |
| 14    | 1,2-DCE (100)                      | [Cu(MeCN) <sub>4</sub> ]CF <sub>3</sub> SO <sub>3</sub> (10.0)                       | 24      | 2.0                | 32/65                                  | 33:67           |
| 15    | 1,2-DCE (90)                       | [Cu(MeCN) <sub>4</sub> ]CF <sub>3</sub> SO <sub>3</sub> (10.0)                       | 24      | 2.0                | 31/57                                  | 29:71           |
| 16    | 1,2-DCE (100)                      | [Cu(MeCN) <sub>4</sub> ]PF <sub>6</sub> (10.0)                                       | 24      | 2.0                | 19/49                                  | 32:68           |
| 17    | 1,2-DCE (100)                      | AgOTf (10.0)                                                                         | 24      | 2.0                | 20/34                                  | 33:67           |
| 18    | 1,2-DCE (100)                      | [Ru( <i>p</i> -cymene)Cl <sub>2</sub> ] <sub>2</sub> (5.0)                           | 24      | 2.0                | 18/47                                  | 31:69           |
| 19    | 1,2-DCE (100)                      | RuCl(PPh <sub>3</sub> ) <sub>3</sub> Cp                                              | 24      | 2.0                | 24/56                                  | 27:73           |
| 20    | <i>n</i> -Hexane (rt)              | Rh <sub>2</sub> (Piv) <sub>4</sub> (0.5)                                             | 24      | 2.0                | NR                                     | –               |
| 21    | 1,4-Dioxane (rt)                   | Rh <sub>2</sub> (Piv) <sub>4</sub> (0.5)                                             | 24      | 2.0                | NR                                     | –               |
| 22    | CHCl <sub>3</sub> (rt)             | Pd <sub>2</sub> (OAc) <sub>4</sub> (2.0)                                             | 24      | 1.1                | NR                                     | –               |
| 23    | CHCl <sub>3</sub> (75)             | Pd <sub>2</sub> (OAc) <sub>4</sub> (2.0)                                             | 3.5     | 1.1                | NR                                     | –               |

Conditions: thioamide **1a** (0.15 mmol), diazo compound **2h** (0.17 mmol, 1.1 equiv or 0.31 mmol, 2.0 equiv), solvent (1.5 mL). <sup>a</sup>Isolated yields. <sup>b</sup>(2RS,3SR:2RS,3RS). Determined by <sup>1</sup>H NMR analysis of the crude mixture.

## General procedure for the synthesis of dihydrothiophenes **4a,i-l** and **4'a,i-l**

**Method A.** A 10 mL standard microwave vial was charge with  $\text{Rh}_2(\text{Piv})_4$  (0.5–1.0 mol %), 2-(morpholine-4-carbonothioyl)-3-phenylacrylonitrile (**1a**) (1.0 equiv) and dry benzene (0.5 mL). A solution of diazo compounds **2h-o** (1.1–2.0 equiv) in dry benzene (0.5–3 mL) was added slowly to the vial at room temperature. The reaction solution was stirred for 19–27 h at room temperature, and then the solution was concentrated under reduced pressure. The crude residue was purified by flash chromatography on silica gel.

**Method B.** A 10 mL standard microwave vial was charge with  $[\text{Cu}(\text{MeCN})_4]\text{CF}_3\text{SO}_3$  (10 mol %), (morpholine-4-carbonothioyl)-3-phenylacrylonitrile (**1a**) (1.0 equiv), diazo compounds **2h-l** (1.2–2.0 equiv) and dry 1,2-DCE (1.0–1.5 mL). The reaction solution was stirred for 24 h at 70–100 °C, and then the solution was concentrated under reduced pressure. The crude residue was purified by flash chromatography on silica gel.

### (2*RS*,3*SR*)-2-Acetyl-4-cyano-*N*-(cyclohexa-2,4-dien-1-yl)-5-morpholino-3-phenyl-2,3-dihydrothiophene-2-carboxamide (**4ah**)

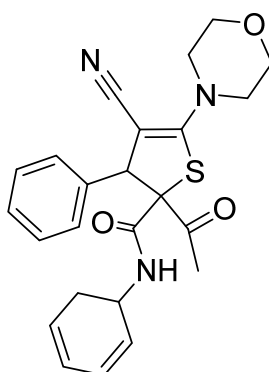

**Method A.** (Morpholine-4-carbonothioyl)-3-phenylacrylonitrile (**1a**) (40 mg, 1.0 equiv, 0.15 mmol), 2-diazo-3-oxo-*N*-phenylbutanamide (**2h**) (63 mg, 2.0 equiv, 0.31 mmol),  $\text{Rh}_2(\text{Piv})_4$  (0.9 mg, 0.5 mol %), benzene (1 mL), reaction time is 19 h. The purification of the crude product by column chromatography on  $\text{SiO}_2$  (DCM/EtOAc, gradient 25:0 to 21:4) afforded **4ah** as a colorless powder (61%, 41 mg), mp 105–106 °C. **Method B.** **1a** (50 mg, 1.0 equiv, 0.19 mmol), **2h** (78 mg, 2.0 equiv, 0.39 mmol),  $[\text{Cu}(\text{MeCN})_4]\text{CF}_3\text{SO}_3$  (14 mg), 1,2-DCE (1 mL), 100 °C, reaction time is 24 h. The product **4ah** was isolated as a colorless powder (32%, 27 mg), mp 105–106 °C.  $^1\text{H}$  NMR (400 MHz,  $\text{DMSO}-d_6$ ):  $\delta$  10.13 (s, 1H), 7.64 (d,  $J = 7.8$  Hz, 2H), 7.41 – 7.44 (m, 7H), 7.13 (t,  $J = 7.4$  Hz, 1H), 5.33 (s, 1H), 3.71 – 3.68 (m, 4H), 3.59 – 3.56 (m, 4H), 1.78 (s, 3H).  $^{13}\text{C}\{^1\text{H}\}$  NMR (100 MHz,  $\text{DMSO}-d_6$ ):  $\delta$  199.0, 166.1, 161.4, 138.5, 136.5, 129.0, 128.7, 128.7, 128.4, 124.3, 120.4, 118.5, 78.2, 72.7, 65.5, 56.4, 50.2, 27.7. HRMS (ESI)  $m/z$ :  $[\text{M} + \text{Na}]^+$  calcd. for  $\text{C}_{24}\text{H}_{25}\text{N}_3\text{O}_3\text{SNa}^+$  456.1351; found 456.1352.



**(2*RS*,3*RS*)-2-Acetyl-4-cyano-*N*-(cyclohexa-2,4-dien-1-yl)-5-morpholino-3-phenyl-2,3-dihydrothiophene-2-carboxamide (4'ah)**

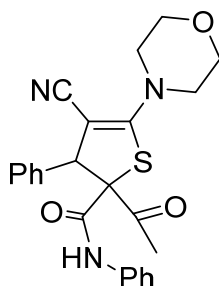

**Method A.** (Morpholine-4-carbonothioyl)-3-phenylacrylonitrile (**1a**) (40 mg, 1.0 equiv, 0.15 mmol), 2-diazo-3-oxo-*N*-phenylbutanamide (**2h**) (63 mg, 2.0 equiv, 0.31 mmol), Rh<sub>2</sub>(Piv)<sub>4</sub> (0.9 mg, 0.5 mol %), benzene (1 mL), reaction time is 19 h. The purification of the crude product by column chromatography on SiO<sub>2</sub> (DCM/EtOAc, gradient 25:0 to 21:4) afforded **4'ah** as an amorphous solid (36%, 25 mg). **Method B.** **1a** (50 mg, 1.0 equiv, 0.19 mmol), **2h** (78 mg, 2.0 equiv, 0.39 mmol), [Cu(MeCN)<sub>4</sub>]CF<sub>3</sub>SO<sub>3</sub> (14 mg), 1,2-DCE (1 mL), 100 °C, reaction time is 24 h. The product **4'ah** was isolated as an amorphous solid (65%, 55 mg). <sup>1</sup>H NMR (400 MHz, DMSO-*d*<sub>6</sub>): δ 9.82 (s, 1H), 7.50 (d, *J* = 7.3 Hz, 2H), 7.26 (t, *J* = 7.4 Hz, 2H), 7.22 – 7.18 (m, 3H), 7.12 – 7.09 (m, 2H), 7.03 (t, *J* = 7.3 Hz, 1H), 4.94 (s, 1H), 3.69 – 3.67 (m, 4H), 3.56 – 3.53 (m, 4H), 2.39 (s, 3H). <sup>13</sup>C {1H} NMR (100 MHz, DMSO-*d*<sub>6</sub>): δ 195.4, 162.3, 159.9, 137.5, 137.2, 128.5, 128.4, 128.2, 127.9, 124.7, 121.2, 118.5, 78.6, 74.8, 65.5, 53.4, 50.3, 24.3. HRMS (ESI) *m/z*: [M + Na]<sup>+</sup> calcd. for C<sub>24</sub>H<sub>23</sub>N<sub>3</sub>O<sub>3</sub>SNa<sup>+</sup> 456.1352; found 456.1356.

**(2*RS*,3*SR*)-4-Cyano-5-morpholino-*N*,3-diphenyl-2-((*E*)-3-(*p*-tolyl)acryloyl)-2,3-dihydrothiophene-2-carboxamide (4ai)**

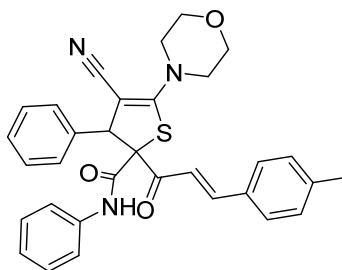

**Method A.** (Morpholine-4-carbonothioyl)-3-phenylacrylonitrile (**1a**) (40 mg, 1.0 equiv, 0.15 mmol), 2-diazo-3-oxo-*N*-phenyl-5-(*p*-tolyl)pent-4-enamide (**2i**) (71 mg, 1.5 equiv, 0.23 mmol), Rh<sub>2</sub>(Piv)<sub>4</sub> (1.4 mg, 1 mol %), benzene (3 mL), reaction time is 24 h. The purification of the crude product by column chromatography on SiO<sub>2</sub> (DCM/EtOAc, gradient 25:0 to 24.5:0.5) afforded **4ai** as a pale-yellow powder (54%, 45 mg), mp 204–206 °C. **Method B.** **1a** (50 mg, 1.0 equiv,

0.19 mmol), **2i** (89 mg, 1.5 equiv, 0.29 mmol), [Cu(MeCN)<sub>4</sub>]CF<sub>3</sub>SO<sub>3</sub> (14.5 mg), 1,2-DCE (1.5 mL), 90 °C, reaction time is 24 h. The product **4ai** was isolated as a pale-yellow powder (27%, 28 mg), mp 204–206 °C. <sup>1</sup>H NMR (400 MHz, DMSO-*d*<sub>6</sub>): δ 10.13 (s, 1H), 7.63 (d, *J* = 7.8 Hz, 2H), 7.45 (br. s, 4H), 7.32 (t, *J* = 7.3 Hz, 2H), 7.24 – 7.07 (m, 7H), 6.84 (d, *J* = 15.8 Hz, 1H), 5.45 (s, 1H), 3.71 (br. s, 4H), 3.61 (br. s, 4H), 2.31 (s, 3H). <sup>13</sup>C{<sup>1</sup>H} NMR (100 MHz, DMSO-*d*<sub>6</sub>): δ 188.9, 166.3, 161.5, 143.1, 141.3, 138.6, 136.8, 131.0, 129.6, 129.0, 128.8, 128.7, 128.2 (2C), 124.2, 120.3, 120.1, 118.6, 78.2, 73.4, 65.5, 56.2, 50.3, 21.1. HRMS (ESI) *m/z*: [M + H]<sup>+</sup> calcd. for C<sub>32</sub>H<sub>30</sub>N<sub>3</sub>O<sub>3</sub>S<sup>+</sup> 536.2002; found 536.2001.

**(2*RS*,3*RS*)-4-Cyano-5-morpholino-*N*,3-diphenyl-2-((*E*)-3-(*p*-tolyl)acryloyl)-2,3-dihydrothiophene-2-carboxamide (**4'ai**)**

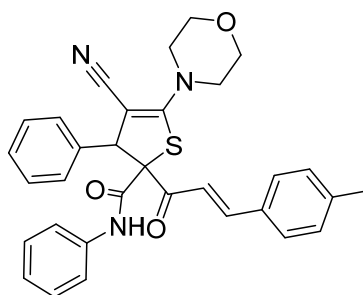

**Method A.** (Morpholine-4-carbonothioyl)-3-phenylacrylonitrile (**1a**) (40 mg, 1.0 equiv, 0.15 mmol), 2-diazo-3-oxo-*N*-phenyl-5-(*p*-tolyl)pent-4-enamide (**2i**) (71 mg, 1.5 equiv, 0.23 mmol), Rh<sub>2</sub>(Piv)<sub>4</sub> (1.4 mg, 1 mol %), benzene (3 mL), reaction time is 24 h. The purification of the crude product by column chromatography on SiO<sub>2</sub> (DCM/EtOAc, gradient 25:0 to 24.5:0.5) afforded **4'ai** as a bright-yellow powder (30%, 25 mg), mp 217–219 °C. **Method B.** **1a** (50 mg, 1.0 equiv, 0.19 mmol), **2i** (89 mg, 1.5 equiv, 0.29 mmol), [Cu(MeCN)<sub>4</sub>]CF<sub>3</sub>SO<sub>3</sub> (14.5 mg), 1,2-DCE (1.5 mL), 90 °C, reaction time is 24 h. The product **4'ai** was isolated as a bright-yellow powder (49%, 51 mg), mp 217–219 °C. <sup>1</sup>H NMR (400 MHz, DMSO-*d*<sub>6</sub>): δ 9.90 (s, 1H), 7.86 (d, *J* = 15.6 Hz, 1H), 7.61 – 7.55 (m, 4H), 7.30 – 7.11 (m, 9H), 7.02 – 6.98 (m, 2H), 5.14 (s, 1H), 3.70 – 3.61 (m, 4H), 3.58 – 3.48 (m, 4H), 2.32 (s, 3H). <sup>13</sup>C{<sup>1</sup>H} NMR (100 MHz, DMSO-*d*<sub>6</sub>): δ 185.9, 162.3, 159.8, 144.8, 141.4, 137.4, 137.3, 131.0, 129.7, 128.7, 128.7, 128.4, 128.2, 127.9, 124.6, 121.1, 119.4, 118.6, 78.0, 75.2, 65.5, 53.3, 50.2, 21.1. HRMS (ESI) *m/z*: [M + H]<sup>+</sup> calcd. for C<sub>32</sub>H<sub>30</sub>N<sub>3</sub>O<sub>3</sub>S<sup>+</sup> 536.2002; found 536.1997.

**(2*RS*,3*SR*)-4-Cyano-2-((*E*)-3-(4-methoxyphenyl)acryloyl)-5-morpholino-*N*,3-diphenyl-2,3-dihydrothiophene-2-carboxamide (**4aj**)**

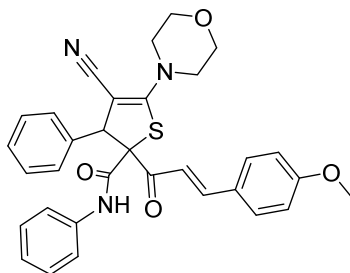

**Method A.** (Morpholine-4-carbonothioyl)-3-phenylacrylonitrile (**1a**) (40 mg, 1.0 equiv, 0.15 mmol), 2-diazo-5-(4-methoxyphenyl)-3-oxo-*N*-phenylpent-4-enamide (**2j**) (75 mg, 1.5 equiv, 0.23 mmol), Rh<sub>2</sub>(Piv)<sub>4</sub> (0.7 mg, 0.5 mol %), benzene (3 mL), reaction time is 24 h. The purification of the crude product by column chromatography on SiO<sub>2</sub> (DCM/EtOAc, gradient 50:0 to 49:1) afforded **4aj** as a yellow amorphous solid (59%, 50 mg) that crystallizes into powder when stored at 40 °C for 12 h, mp 214–216 °C. **Method B.** **1a** (50 mg, 1.0 equiv, 0.19 mmol), **2j** (93 mg, 1.5 equiv, 0.29 mmol), [Cu(MeCN)<sub>4</sub>]CF<sub>3</sub>SO<sub>3</sub> (10.7 mg), 1,2-DCE (1.5 mL), 90 °C, reaction time is 24 h. The product **4aj** was isolated as a yellow amorphous solid (36%, 39 mg) that crystallizes into powder when stored at 40 °C for 12 h, mp 214–216 °C. <sup>1</sup>H NMR (400 MHz, DMSO-*d*<sub>6</sub>): δ 10.14 (s, 1H), 7.65 (d, *J* = 7.9 Hz, 2H), 7.54 (d, *J* = 8.7 Hz, 2H), 7.47 (d, *J* = 7.4 Hz, 2H), 7.32 (t, *J* = 7.9 Hz, 2H), 7.24 – 7.13 (m, 4H), 7.09 (t, *J* = 7.4 Hz, 1H), 6.95 (d, *J* = 8.7 Hz, 2H), 6.78 (d, *J* = 15.6 Hz, 1H), 5.46 (s, 1H), 3.79 (s, 3H), 3.71 – 3.68 (m, 4H), 3.61 – 3.59 (m, 4H). <sup>13</sup>C {<sup>1</sup>H} NMR (100 MHz, DMSO-*d*<sub>6</sub>): δ 188.6, 166.4, 161.7, 161.5, 143.2, 138.6, 136.9, 130.7, 129.0, 128.6, 128.2, 128.1, 126.3, 124.2, 120.4, 118.6, 118.6, 114.5, 78.5, 73.6, 65.5, 56.2, 55.4, 50.3. HRMS (ESI) *m/z*: [M + Na]<sup>+</sup> calcd. for C<sub>32</sub>H<sub>29</sub>N<sub>3</sub>O<sub>4</sub>SNa<sup>+</sup> 574.1771; found 574.1771.

**(2*RS*,3*RS*)-4-Cyano-2-((*E*)-3-(4-methoxyphenyl)acryloyl)-5-morpholino-*N*,3-diphenyl-2,3-dihydrothiophene-2-carboxamide (**4'aj**)**

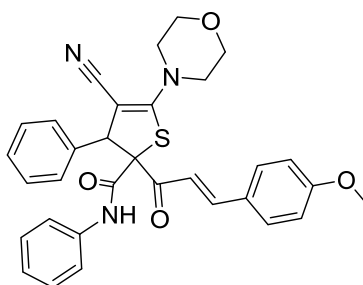

**Method A.** (Morpholine-4-carbonothioyl)-3-phenylacrylonitrile (**1a**) (40 mg, 1.0 equiv, 0.15 mmol), 2-diazo-5-(4-methoxyphenyl)-3-oxo-*N*-phenylpent-4-enamide (**2j**) (75 mg, 1.5 equiv, 0.23 mmol), Rh<sub>2</sub>(Piv)<sub>4</sub> (0.7 mg, 0.5 mol %), benzene (3 mL), reaction time is 24 h. The purification of

the crude product by column chromatography on SiO<sub>2</sub> (DCM/EtOAc, gradient 50:0 to 46:4) afforded **4'aj** as a yellow powder (32%, 27 mg), mp 222–223 °C. **Method B. 1a** (50 mg, 1.0 equiv, 0.19 mmol), **2j** (93 mg, 1.5 equiv, 0.29 mmol), [Cu(MeCN)<sub>4</sub>]CF<sub>3</sub>SO<sub>3</sub> (10.7 mg), 1,2-DCE (1.5 mL), 90 °C, reaction time is 24 h. The product **4'aj** was isolated as a yellow powder (56%, 60 mg), mp 222–223 °C. <sup>1</sup>H NMR (400 MHz, DMSO-*d*<sub>6</sub>): δ 9.90 (s, 1H), 7.85 (d, *J* = 15.5 Hz, 1H), 7.67 (d, *J* = 8.7 Hz, 2H), 7.57 (d, *J* = 7.3 Hz, 2H), 7.28 (t, *J* = 7.4 Hz, 2H), 7.23 – 7.12 (m, 5H), 7.02 – 6.97 (m, 3H), 6.91 (d, *J* = 15.5 Hz, 1H), 5.14 (s, 1H), 3.79 (s, 3H), 3.69 – 3.64 (m, 4H), 3.58 – 3.49 (m, 4H). <sup>13</sup>C{<sup>1</sup>H} NMR (100 MHz, DMSO-*d*<sub>6</sub>): δ 186.0, 186.0\*, 162.5, 162.4\*, 161.7, 159.9, 144.6, 137.5, 137.3, 137.2\*, 130.7, 128.7, 128.4, 128.2, 127.9, 126.4, 124.6, 121.1, 121.0\*, 118.6, 117.8, 114.6, 78.0, 75.2, 65.5, 55.4, 53.3, 50.2. HRMS (ESI) *m/z*: [M + H]<sup>+</sup> calcd. for C<sub>32</sub>H<sub>30</sub>N<sub>3</sub>O<sub>4</sub>S<sup>+</sup> 552.1951; found 552.1949.

**(2*RS*,3*SR*)-4-Cyano-2-((*E*)-3-(4-cyanophenyl)acryloyl)-5-morpholino-*N*,3-diphenyl-2,3-dihydrothiophene-2-carboxamide (**4ak**)**

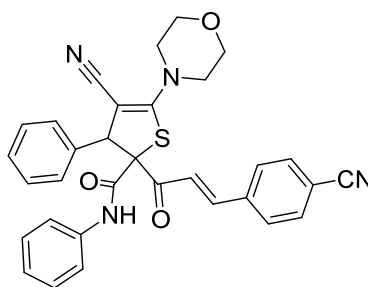

**Method A.** (Morpholine-4-carbonothioyl)-3-phenylacrylonitrile (**1a**) (40 mg, 1.0 equiv, 0.15 mmol), 5-(4-cyanophenyl)-2-diazo-3-oxo-*N*-phenylpent-4-enamide (**2k**) (73 mg, 1.5 equiv, 0.23 mmol), Rh<sub>2</sub>(Piv)<sub>4</sub> (1.4 mg, 1.0 mol %), benzene (3 mL), reaction time is 24 h. The purification of the crude product by column chromatography on SiO<sub>2</sub> (DCM/EtOAc, gradient 25:0 to 23.5:1.5) afforded **4ak** as a yellow powder (59%, 50 mg), mp 166–168 °C. **Method B. 1a** (50 mg, 1.0 equiv, 0.19 mmol), **2k** (92 mg, 1.5 equiv, 0.29 mmol), [Cu(MeCN)<sub>4</sub>]CF<sub>3</sub>SO<sub>3</sub> (10.9 mg), 1,2-DCE (1.5 mL), 90 °C, reaction time is 24 h. The product **4ak** was isolated as a yellow powder (21%, 20 mg), mp 166–168 °C. <sup>1</sup>H NMR (400 MHz, DMSO-*d*<sub>6</sub>): δ 10.16 (s, 1H), 7.85 (d, *J* = 8.3 Hz, 2H), 7.77 (d, *J* = 8.3 Hz, 2H), 7.63 (d, *J* = 7.9 Hz, 2H), 7.47 (d, *J* = 7.4 Hz, 2H), 7.32 (t, *J* = 7.9 Hz, 2H), 7.25 – 7.21 (m, 3H), 7.15 – 7.03 (m, 3H), 5.50 (s, 1H), 3.74 – 3.70 (m, 4H), 3.65 – 3.58 (m, 4H). <sup>13</sup>C{<sup>1</sup>H} NMR (150 MHz, DMSO-*d*<sub>6</sub>): δ 189.4, 166.0, 161.5, 140.6, 138.6, 138.2, 136.6, 132.8, 129.3, 129.1, 128.7, 128.3 (2C), 124.2, 124.0, 120.3, 118.6, 118.5, 112.7, 77.6, 73.3, 65.5, 56.2, 50.3. HRMS (ESI) *m/z*: [M + H]<sup>+</sup> calcd. for C<sub>32</sub>H<sub>27</sub>N<sub>4</sub>O<sub>3</sub>S<sup>+</sup> 547.1798; found 547.1789.

**(2*RS*,3*RS*)-4-Cyano-2-((*E*)-3-(4-cyanophenyl)acryloyl)-5-morpholino-*N*,3-diphenyl-2,3-dihydrothiophene-2-carboxamide (4'ak)**

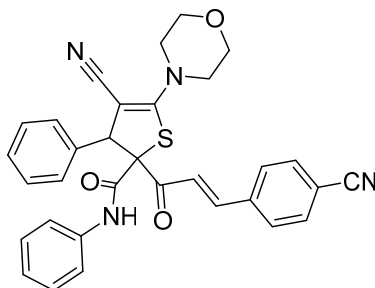

**Method A.** (Morpholine-4-carbonothioyl)-3-phenylacrylonitrile (**1a**) (40 mg, 1.0 equiv, 0.15 mmol), 5-(4-cyanophenyl)-2-diazo-3-oxo-*N*-phenylpent-4-enamide (**2k**) (73 mg, 1.5 equiv, 0.23 mmol), Rh<sub>2</sub>(Piv)<sub>4</sub> (1.4 mg, 1.0 mol %), benzene (3 mL), reaction time is 24 h. The purification of the crude product by column chromatography on SiO<sub>2</sub> (DCM/EtOAc, gradient 25:0 to 23.5:1.5) afforded **4'ak** as a yellow powder (28%, 24 mg), mp 242–244 °C. **Method B.** **1a** (50 mg, 1.0 equiv, 0.19 mmol), **2k** (92 mg, 1.5 equiv, 0.29 mmol), [Cu(MeCN)<sub>4</sub>]CF<sub>3</sub>SO<sub>3</sub> (10.9 mg), 1,2-DCE (1.5 mL), 90 °C, reaction time is 24 h. The product **4'ak** was isolated as a yellow powder (57%, 60 mg), mp 242–244 °C. <sup>1</sup>H NMR (400 MHz, DMSO-*d*<sub>6</sub>): δ 9.91 (s, 1H), 7.96 – 7.92 (m, 3H), 7.87 (d, *J* = 8.3 Hz, 2H), 7.54 (d, *J* = 7.3 Hz, 2H), 7.29 (t, *J* = 7.4 Hz, 2H), 7.24 – 7.10 (m, 6H), 7.01 (t, *J* = 7.2 Hz, 1H), 5.14 (s, 1H), 3.69 – 3.65 (m, 4H), 3.59 – 3.49 (m, 4H). <sup>13</sup>C {<sup>1</sup>H} NMR (100 MHz, DMSO-*d*<sub>6</sub>): δ 185.5, 162.0, 159.7, 142.6, 138.2, 137.2, 137.1, 132.9, 129.3, 128.7, 128.4, 128.3, 128.0, 124.7, 123.9, 121.3, 118.5, 112.7, 77.7, 75.0, 65.5, 53.4, 50.3. HRMS (ESI) *m/z*: [M + H]<sup>+</sup> calcd. for C<sub>32</sub>H<sub>27</sub>N<sub>4</sub>O<sub>3</sub>S<sup>+</sup> 547.1798; found 547.1792.

**(2*RS*,3*SR*)-4-Cyano-5-morpholino-*N*,3-diphenyl-2-((*E*)-3-(4-(trifluoromethyl)phenyl)acryloyl)-2,3-dihydrothiophene-2-carboxamide (4al)**

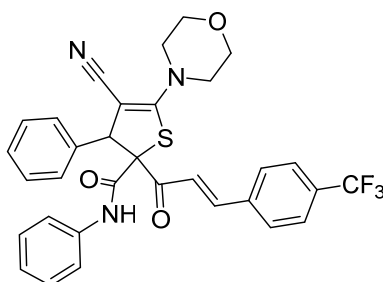

**Method A.** (Morpholine-4-carbonothioyl)-3-phenylacrylonitrile (**1a**) (40 mg, 1.0 equiv, 0.15 mmol), 2-diazo-3-oxo-*N*-phenyl-5-(4-(trifluoromethyl)phenyl)pent-4-enamide (**2l**) (83 mg, 1.5 equiv, 0.23 mmol), Rh<sub>2</sub>(Piv)<sub>4</sub> (1.4 mg, 1.0 mol %), benzene (3 mL), reaction time is 24 h. The purification of the crude product by column chromatography on SiO<sub>2</sub> (DCM) afforded **4al** as a yellow amorphous solid (59%, 54 mg), that crystallizes into powder when treated with cold diethyl

ether, mp 209–210 °C. **Method B.** **1a** (40 mg, 1.0 equiv, 0.15 mmol), **2l** (83 mg, 1.5 equiv, 0.23 mmol), [Cu(MeCN)<sub>4</sub>]CF<sub>3</sub>SO<sub>3</sub> (8.7 mg), 1,2-DCE (1.5 mL), 90 °C, reaction time is 24 h. The product **4al** was isolated as a yellow amorphous solid (30%, 26 mg), that crystallizes into powder when treated with cold diethyl ether, mp 209–210 °C. <sup>1</sup>H NMR (400 MHz, DMSO-*d*<sub>6</sub>): δ 10.17 (s, 1H), 7.80 (d, *J* = 8.2 Hz, 2H), 7.74 (d, *J* = 8.3 Hz, 2H), 7.64 (d, *J* = 7.9 Hz, 2H), 7.48 (d, *J* = 7.5 Hz, 2H), 7.34 – 7.22 (m, 5H), 7.16 – 7.02 (m, 3H), 5.50 (s, 1H), 3.73 – 3.71 (m, 4H), 3.66 – 3.62 (m, 4H). <sup>19</sup>F {1H} NMR (376 MHz, DMSO-*d*<sub>6</sub>): δ -61.38. <sup>13</sup>C {1H} NMR (150 MHz, DMSO-*d*<sub>6</sub>): δ 189.3, 166.1, 161.5, 140.9, 138.6, 137.7, 136.7, 130.4 (q, *J* = 31.9 Hz), 129.3, 129.1, 128.7, 128.4, 126.6, 125.8 (q, *J* = 3.1 Hz), 123.6 (q, *J* = 272 Hz), 121.2, 120.3, 118.6, 77.7, 73.3, 65.5, 56.3, 50.3. HRMS (ESI) *m/z*: [M + H]<sup>+</sup> calcd. for C<sub>32</sub>H<sub>27</sub>F<sub>3</sub>N<sub>3</sub>O<sub>3</sub>S<sup>+</sup> 590.1719; found 590.1709.

**(2*RS*,3*RS*)-4-Cyano-5-morpholino-*N*,3-diphenyl-2-((*E*)-3-(4-(trifluoromethyl)phenyl)acryloyl)-2,3-dihydrothiophene-2-carboxamide (4'al)**

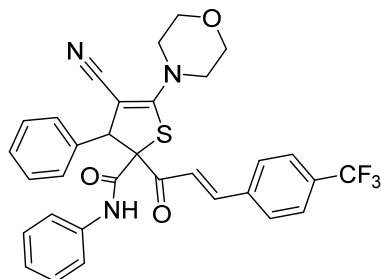

**Method A.** (Morpholine-4-carbonothioyl)-3-phenylacrylonitrile (**1a**) (40 mg, 1.0 equiv, 0.15 mmol), 2-diazo-3-oxo-*N*-phenyl-5-(4-(trifluoromethyl)phenyl)pent-4-enamide (**2l**) (83 mg, 1.5 equiv, 0.23 mmol), Rh<sub>2</sub>(Piv)<sub>4</sub> (1.4 mg, 1.0 mol %), benzene (3 mL), reaction time is 24 h. The purification of the crude product by column chromatography on SiO<sub>2</sub> (DCM) afforded **4'al** as a yellow amorphous solid (25%, 23 mg), that crystallizes into powder when treated with cold diethyl ether, mp 218–220 °C. **Method B.** **1a** (40 mg, 1.0 equiv, 0.15 mmol), **2l** (83 mg, 1.5 equiv, 0.23 mmol), [Cu(MeCN)<sub>4</sub>]CF<sub>3</sub>SO<sub>3</sub> (8.7 mg), 1,2-DCE (1.5 mL), 90 °C, reaction time is 24 h. The product **4'al** was isolated as a yellow amorphous solid (60%, 51 mg), that crystallizes into powder when treated with cold diethyl ether, mp 218–220 °C. <sup>1</sup>H NMR (400 MHz, DMSO-*d*<sub>6</sub>): δ 9.93 (s, 1H), 7.98 – 7.94 (m, 3H), 7.77 (d, *J* = 8.3 Hz, 2H), 7.55 (d, *J* = 7.3 Hz, 2H), 7.29 (t, *J* = 7.4 Hz, 2H), 7.24 – 7.10 (m, 6H), 7.01 (t, *J* = 7.2 Hz, 1H), 5.14 (s, 1H), 3.68 – 3.65 (m, 4H), 3.59 – 3.49 (m, 4H). <sup>19</sup>F {1H} NMR (376 MHz, DMSO-*d*<sub>6</sub>): δ -61.37. <sup>13</sup>C {1H} NMR (150 MHz, DMSO-*d*<sub>6</sub>): δ 185.6, 162.0, 159.7, 142.8, 137.7, 137.2, 137.1, 130.43 (q, *J* = 31.9 Hz), 129.4, 128.7, 128.4, 128.3, 128.0, 125.9 (q, *J* = 4.0 Hz), 124.7, 123.9 (q, *J* = 272.3 Hz), 123.2, 121.3, 118.5, 77.8, 75.1, 65.5, 53.4, 50.3. HRMS (ESI) *m/z*: [M + H]<sup>+</sup> calcd. for C<sub>32</sub>H<sub>27</sub>F<sub>3</sub>N<sub>3</sub>O<sub>3</sub>S<sup>+</sup> 590.1719; found 590.1713.

## General procedure for the synthesis of dihydrothiophenes **4a,m-o** and **4'a,m-o**

**Method A.** A 10 mL standard microwave vial was charge with  $\text{Rh}_2(\text{Piv})_4$  (0.5 mol %), (morpholine-4-carbonothioyl)-3-phenylacrylonitrile (**1a**) (1.0 equiv) and dry chloroform (0.5 mL). A solution of diazo compounds **2m,n** (1.1 equiv) in dry chloroform (0.5 mL) was added slowly to the vial at 0 °C. The order of mixing the reagents for diazo compounds **2o** (1.6 equiv) was reversed. The reaction solution was stirred for 1 h at room temperature, and then the solution was directly subjected to  $\text{SiO}_2$ .

**Method B.** A 10 mL standard microwave vial was charge with  $[\text{Cu}(\text{MeCN})_4]\text{CF}_3\text{SO}_3$  (10 mol %), (morpholine-4-carbonothioyl)-3-phenylacrylonitrile (**1a**) (1.0 equiv), 2-cyano-2-diazo-*N*-phenylacetamide (**2m**) (1.2 equiv) and dry chloroform (1 mL). The reaction solution was stirred for 24 h at 70 °C, and then the solution was directly subjected to  $\text{SiO}_2$  afforded **4f**.

### (*2RS,3RS*)-2,4-Dicyano-5-morpholino-*N,3*-diphenyl-2,3-dihydrothiophene-2-carboxamide (**4am**)

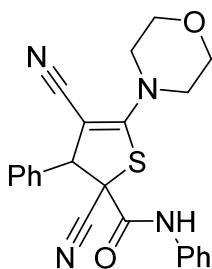

**Method A.** (Morpholine-4-carbonothioyl)-3-phenylacrylonitrile (**1a**) (40 mg, 1.0 equiv, 0.15 mmol), 2-cyano-2-diazo-*N*-phenylacetamide (**2m**) (35 mg, 1.1 equiv, 0.18 mmol),  $\text{Rh}_2(\text{Piv})_4$  (0.5 mg, 0.5 mol %), chloroform (1 mL), reaction time is 1 h. The purification of the crude product by column chromatography on  $\text{SiO}_2$  (PE/EtOAc, gradient 0:50 to 30:20) afforded **4am** as a yellow amorphous solid, that crystallizes into colorless powder when treated with cold diethyl ether (56%, 36 mg, dr 93:7), mp 181–183 °C. **Method B.** **1a** (40 mg, 1.0 equiv, 0.15 mmol), **2m** (35 mg, 1.2 equiv, 0.23 mmol),  $[\text{Cu}(\text{MeCN})_4]\text{CF}_3\text{SO}_3$  (7.1 mg). The product **4am** was isolated as a yellow amorphous solid, that crystallizes into colorless powder when treated with cold diethyl ether (51%, 33 mg), mp 218–220 °C. Diastereomer **4'am** was isolated in a trace amount.  $^1\text{H}$  NMR (400 MHz,  $\text{DMSO}-d_6$ ):  $\delta$  10.76 (NH, s, 1H), 10.70 (NH, s, 1H, *minor isomer*), 7.64 (d,  $J = 7.7$  Hz, 2H), 7.45 – 7.37 (m, 7H), 7.30 – 7.24 (m,  $x\text{H}$ , *minor isomer*), 7.18 (t,  $J = 7.2$  Hz, 1H), 5.35 (s, 1H), 5.06 (s, 1H, *minor isomer*), 3.73 – 3.70 (m, 4H), 3.64 – 3.61 (m, 4H).  $^{13}\text{C}$  { $^1\text{H}$ } NMR (100 MHz,  $\text{DMSO}-d_6$ ):  $\delta$  160.9, 160.8 (*minor isomer*), 160.5, 137.7, 137.6 (*minor isomer*), 135.2, 129.1, 128.9, 128.8 (*minor isomer*), 128.7, 128.4 (*minor isomer*), 125.1 (*minor isomer*), 125.0, 120.8, 120.6 (*minor*

*isomer*), 118.0, 115.7, 70.4, 65.5, 58.0, 57.1, 50.5. HRMS (ESI)  $m/z$ :  $[M + H]^+$  calcd. for  $C_{23}H_{21}N_4O_2S^+$  417.1380; found 417.1384.

**(2*RS*,3*RS*)-2,4-Dicyano-5-morpholino-*N*-phenethyl-3-phenyl-2,3-dihydrothiophene-2-carboxamide (4an)**

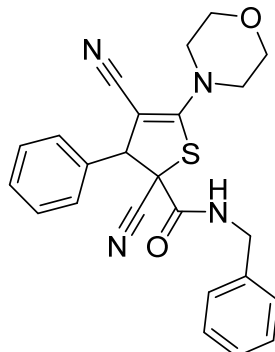

**Method A.** (Morpholine-4-carbonothioyl)-3-phenylacrylonitrile (**1a**) (50 mg, 1.0 equiv, 0.19 mmol), *N*-benzyl-2-cyano-2-diazoacetamide (**2n**) (43 mg, 1.1 equiv, 0.21 mmol),  $Rh_2(Piv)_4$  (0.65 mg, 0.5 mol %), chloroform (1 mL), reaction time is 1 h. The purification of the crude product by column chromatography on  $SiO_2$  (PE/EtOAc, gradient 0:50 to 30:20) afforded **4an** as a colorless solid (44%, 37 mg, dr 96:4), mp 216–217 °C.  $^1H$  NMR (400 MHz,  $DMSO-d_6$ ):  $\delta$  9.42 (t,  $J = 5.3$  Hz, 2H, *minor isomer*), 9.31 (t,  $J = 5.5$  Hz, 2H), 7.44 – 7.40 (m, 2H), 7.38 – 7.30 (m, 3H), 7.28 – 7.23 (m, 3H), 6.94 – 6.92 (m, 2H), 5.16 (s, 1H, *minor isomer*), 4.86 (s, 1H), 4.10 (dd,  $J = 15.0, 5.9$  Hz, 1H), 3.99 (dd,  $J = 15.1, 5.4$  Hz, 1H), 3.73 – 3.71 (m, 4H), 3.67 – 3.64 (m, 4H).  $^{13}C\{^1H\}$  NMR (150 MHz,  $DMSO-d_6$ ):  $\delta$  161.0, 159.6, 137.3, 134.6, 128.9, 128.6, 128.5, 128.3, 127.3, 127.1, 119.9, 118.2, 71.0, 65.5, 62.1, 57.8, 50.5, 43.5. HRMS (ESI)  $m/z$ :  $[M + H]^+$  calcd. for  $C_{24}H_{23}N_4O_2S^+$  431.1536; found 431.1537.

**(2*RS*,3*SR*)-2,4-Dicyano-5-morpholino-*N*-phenethyl-3-phenyl-2,3-dihydrothiophene-2-carboxamide (4'an)**

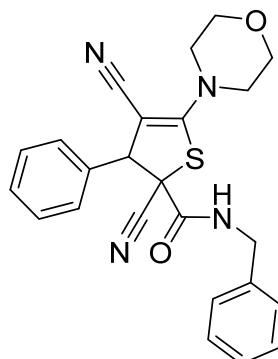

**Method A.** (Morpholine-4-carbonothioyl)-3-phenylacrylonitrile (**1a**) (50 mg, 1.0 equiv, 0.19 mmol), *N*-benzyl-2-cyano-2-diazoacetamide (**2n**) (43 mg, 1.1 equiv, 0.21 mmol),  $Rh_2(Piv)_4$  (0.65 mg, 0.5 mol %), chloroform (1 mL), reaction time is 1 h. The purification of the crude product by



column chromatography on SiO<sub>2</sub> (PE/EtOAc, gradient 0:50 to 30:20) afforded **4'an** that crystallizes into colorless powder when treated with cold diethyl ether (44%, 37 mg, dr 96:4), mp 138–140 °C. <sup>1</sup>H NMR (400 MHz, DMSO-*d*<sub>6</sub>): δ 9.43 (t, *J* = 5.8 Hz, 2H), 9.31 (t, *J* = 5.3 Hz, 2H, *minor isomer*), 7.44 – 7.40 (m, 3H), 7.37 – 7.34 (m, 4H), 7.30 – 7.26 (m, 3H), 5.17 (s, 1H), 4.86 (s, 1H, *minor isomer*), 4.39 (d, *J* = 5.8 Hz, 2H), 3.71 – 3.69 (m, 4H), 3.63 – 3.61 (m, 4H). <sup>13</sup>C{<sup>1</sup>H} NMR (100 MHz, DMSO-*d*<sub>6</sub>): δ 162.4, 160.5, 138.2, 135.0, 129.0, 129.0, 128.6, 128.4, 127.2, 127.1, 118.0, 115.9, 70.1, 65.5, 58.4, 56.8, 50.5, 43.7. HRMS (ESI) *m/z*: [M + H]<sup>+</sup> calcd. for C<sub>24</sub>H<sub>23</sub>N<sub>4</sub>O<sub>2</sub>S<sup>+</sup> 431.1536; found 431.1533.

**(2*RS*,3*RS*)-2,4-Dicyano-5-morpholino-3-phenyl-2,3-dihydrothiophene-2-carboxamide (4a*o*)**

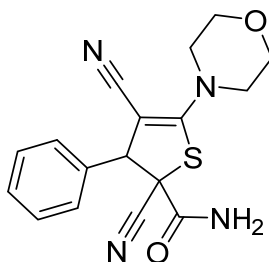

**Method A.** (Morpholine-4-carbonothioyl)-3-phenylacrylonitrile (**1a**) (50 mg, 1.0 equiv, 0.19 mmol), 2-cyano-2-diazoacetamide (**2o**) (34 mg, 1.6 equiv, 0.31 mmol), Rh<sub>2</sub>(Piv)<sub>4</sub> (0.94 mg, 0.5 mol %), chloroform (1 mL), reaction time is 1 h. The purification of the crude product by column chromatography on SiO<sub>2</sub> (PE/EtOAc, gradient 20:30 to 10:40) afforded **4a*o*** as a colorless solid (56%, 37 mg, single isomer), mp 208–209 °C. <sup>1</sup>H NMR (400 MHz, DMSO-*d*<sub>6</sub>): δ 8.25 (s, 1H, NH<sub>2</sub>), 7.91 (s, 1H, NH<sub>2</sub>), 7.48 – 7.46 (m, 2H), 7.38 – 7.34 (m, 3H), 4.81 (s, 1H), 3.73 – 3.71 (m, 4H), 3.66 – 3.65 (m, 4H). <sup>13</sup>C{<sup>1</sup>H} NMR (150 MHz, DMSO-*d*<sub>6</sub>): δ 161.3, 161.0, 134.7, 128.9, 128.8, 128.4, 120.0, 118.2, 70.9, 65.5, 62.7, 57.7, 50.5. HRMS (ESI) *m/z*: [M + H]<sup>+</sup> calcd. for C<sub>17</sub>H<sub>17</sub>N<sub>4</sub>O<sub>2</sub>S<sup>+</sup> 341.1067; found 341.1064.

**(2*RS*,3*SR*)-2,4-Dicyano-5-morpholino-3-phenyl-2,3-dihydrothiophene-2-carboxamide (4'a*o*)**

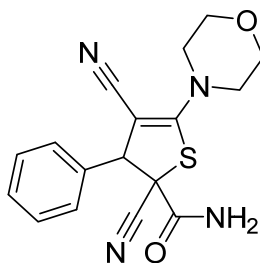

**Method A.** (Morpholine-4-carbonothioyl)-3-phenylacrylonitrile (**1a**) (50 mg, 1.0 equiv, 0.19 mmol), 2-cyano-2-diazoacetamide (**2o**) (34 mg, 1.6 equiv, 0.31 mmol), Rh<sub>2</sub>(Piv)<sub>4</sub> (0.94 mg, 0.5 mol %), chloroform (1 mL), reaction time is 1 h. The purification of the crude product by column chromatography on SiO<sub>2</sub> (PE/EtOAc, gradient 20:30 to 10:40) afforded **4'a*o*** as a yellow

amorphous solid (39%, 26 mg, single isomer).  $^1\text{H}$  NMR (600 MHz,  $\text{DMSO-}d_6$ ):  $\delta$  8.32 (s, 1H,  $\text{NH}_2$ ), 8.19 (s, 1H,  $\text{NH}_2$ ), 7.45 – 7.39 (m, 5H), 5.14 (s, 1H), 3.71 – 3.70 (m, 4H), 3.62 – 3.61 (m, 4H).  $^{13}\text{C}\{^1\text{H}\}$  NMR (150 MHz,  $\text{DMSO-}d_6$ ):  $\delta$  164.0, 160.6, 135.3, 129.0, 128.9, 128.6, 118.1, 116.0, 70.0, 65.5, 58.2, 50.5. HRMS (ESI)  $m/z$ :  $[\text{M} + \text{H}]^+$  calcd. for  $\text{C}_{17}\text{H}_{17}\text{N}_4\text{O}_2\text{S}^+$  341.1067; found 341.1072.

## General procedure for the synthesis of dihydrothiophenes 5

A 10 mL standard microwave vial was charge with  $\text{Rh}_2(\text{Piv})_4$  (0.5 mol %), thioamide **1** (1.0 equiv) and dry chloroform (0.5-1 mL). A solution of diazo compound **2n** (1.5 equiv), **2h** (1.5 equiv), **2p** (1.5–2.0 equiv), **2q** (1.5 equiv), **2s** (1.5 equiv) or **2t** (1.2 equiv) in dry chloroform (1-2 mL) was added slowly to the vial via syringe at room temperature. The reaction solution was stirred for 10 min–14 h at room temperature or at 40 °C (for **5kp**), 60 °C (for **5jq**) or 45 °C (for **5as,xs**), and then the solution was directly subjected to  $\text{SiO}_2$  or neutral alumina (for **5at**).

### *N*-Benzyl-2,4-dicyano-3,3-dimethyl-5-morpholino-2,3-dihydrothiophene-2-carboxamide (**5hn**)

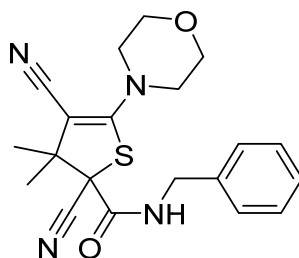

Product **5hn** was obtained according to the general procedure from 3-methyl-2-(morpholine-4-carbonothioyl)but-2-enenitrile (**1h**) (75 mg, 1.0 equiv, 0.36 mmol), *N*-benzyl-2-cyano-2-diazoacetamide (**2n**) (107 mg, 1.5 equiv, 0.53 mmol),  $\text{Rh}_2(\text{Piv})_4$  (1.6 mg), chloroform (3.0 mL), reaction time is 13 min. The purification of the crude product by column chromatography on  $\text{SiO}_2$  (DCM/EtOAc, gradient 25:0 to 23.5:1.5) afforded **5hn** as a yellow gum (98%, 134 mg).  $^1\text{H}$  NMR (400 MHz,  $\text{CDCl}_3$ -*d*):  $\delta$  7.38 – 7.32 (m, 3H), 7.28 – 7.26 (m, 2H), 6.61 (t,  $J = 5.1$  Hz, 1H), 4.55 – 4.42 (m, 2H), 3.74 – 3.72 (m, 4H), 3.58 – 3.56 (m, 4H), 1.63 (s, 3H), 1.25 (s, 3H).  $^{13}\text{C}\{^1\text{H}\}$  NMR (100 MHz,  $\text{CDCl}_3$ -*d*):  $\delta$  160.7, 158.5, 136.5, 129.1, 128.4, 128.1, 117.6, 117.3, 79.2, 66.2, 63.4, 53.7, 50.9, 45.2, 25.0, 22.8. HRMS (ESI)  $m/z$ :  $[\text{M} + \text{H}]^+$  calcd. for  $\text{C}_{20}\text{H}_{23}\text{N}_4\text{O}_2\text{S}^+$  383.1536; found 383.1539.

### *N*-Benzyl-1,4-dicyano-3-morpholino-2-thiaspiro[4.4]non-3-ene-1-carboxamide (**5in**)

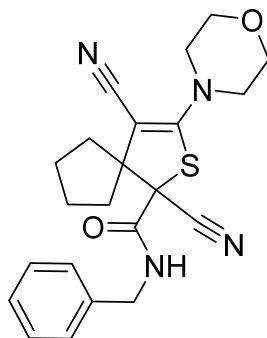

Product **5in** was obtained according to the general procedure from 2-cyclopentylidene-3-morpholino-3-thioxopropanenitrile (**1i**) (69 mg, 1.0 equiv, 0.29 mmol), *N*-benzyl-2-cyano-2-diazoacetamide (**2n**) (88 mg, 1.5 equiv, 0.44 mmol), Rh<sub>2</sub>(Piv)<sub>4</sub> (1.3 mg), chloroform (3.0 mL), reaction time is 15 min. The purification of the crude product by column chromatography on SiO<sub>2</sub> (DCM/EtOAc, gradient 25:0 to 23.5:1.5) afforded **5in** as a pale-yellow gum (83%, 99 mg), that crystallizes into powder when stored at 50 °C for 8 h, mp 143–145 °C. <sup>1</sup>H NMR (400 MHz, CDCl<sub>3</sub>-*d*): δ 7.38 – 7.27 (m, 5H), 6.66 (t, *J* = 5.8 Hz, 1H), 4.54 – 4.42 (m, 2H), 3.73 – 3.71 (m, 4H), 3.58 – 3.56 (m, 4H), 2.40 – 2.33 (m, 1H), 2.21 – 2.15 (m, 1H), 2.05 – 1.97 (m, 1H), 1.91 – 1.72 (m, 4H), 1.63 – 1.54 (m, 1H). <sup>13</sup>C{<sup>1</sup>H} NMR (100 MHz, CDCl<sub>3</sub>-*d*): δ 161.5, 159.3, 136.5, 129.1, 128.4, 128.1, 117.9, 117.3, 80.3, 66.3, 64.6, 62.1, 51.1, 45.1, 36.8, 35.7, 25.4, 24.9. HRMS (ESI) *m/z*: [M + H]<sup>+</sup> calcd. for C<sub>22</sub>H<sub>25</sub>N<sub>4</sub>O<sub>2</sub>S<sup>+</sup> 409.1693; found 409.1695.

***N*-Benzyl-1,4-dicyano-3-morpholino-2-thiaspiro[4.5]dec-3-ene-1-carboxamide (5jn)**

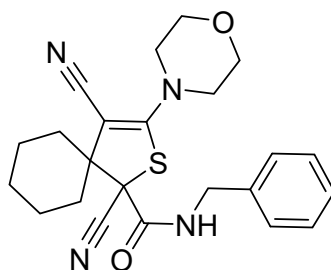

Product **5jn** was obtained according to the general procedure from 2-cyclohexylidene-3-morpholino-3-thioxopropanenitrile (**1j**) (68 mg, 1.0 equiv, 0.27 mmol), *N*-benzyl-2-cyano-2-diazoacetamide (**2n**) (81 mg, 1.5 equiv, 0.40 mmol), Rh<sub>2</sub>(Piv)<sub>4</sub> (1.2 mg), chloroform (3.0 mL), reaction time is 10 min. The purification of the crude product by column chromatography on SiO<sub>2</sub> (DCM/EtOAc, gradient 25:0 to 24:1) afforded **5jn** as a colorless powder (90%, 104 mg), mp 178–179 °C. <sup>1</sup>H NMR (400 MHz, CDCl<sub>3</sub>-*d*): δ 7.39 – 7.28 (m, 5H), 6.61 (t, *J* = 4.5 Hz, 1H), 4.55 (dd, *J* = 14.6, 5.8 Hz, 1H), 4.43 (dd, *J* = 14.5, 5.3 Hz, 1H), 3.74 – 3.72 (m, 4H), 3.64 – 3.54 (m, 4H), 2.28 (d, *J* = 11.1 Hz, 1H), 2.04 – 1.89 (m, 3H), 1.77 – 1.61 (m, 4H), 1.37 – 1.30 (m, 1H), 1.20 – 1.08 (m, 1H). <sup>13</sup>C{<sup>1</sup>H} NMR (100 MHz, CDCl<sub>3</sub>-*d*): δ 162.3, 161.0, 136.5, 129.1, 128.4, 128.1, 119.3, 117.1, 77.6, 66.4, 64.6, 56.0, 51.4, 45.2, 33.4, 32.7, 25.0, 22.3, 22.3. HRMS (ESI) *m/z*: [M + H]<sup>+</sup> calcd. for C<sub>23</sub>H<sub>27</sub>N<sub>4</sub>O<sub>2</sub>S<sup>+</sup> 423.1849; found 423.1851.

***N*-Benzyl-1,4-dicyano-3-morpholino-8-oxa-2-thiaspiro[4.5]dec-3-ene-1-carboxamide (5kn)**

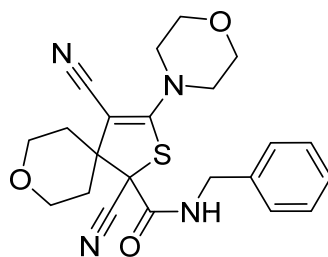

Product **5kn** was obtained according to the general procedure from 3-morpholino-2-(tetrahydro-4*H*-pyran-4-ylidene)-3-thioxopropanenitrile (**1k**) (50 mg, 1.0 equiv, 0.20 mmol), *N*-benzyl-2-cyano-2-diazoacetamide (**2n**) (59 mg, 1.5 equiv, 0.30 mmol), Rh<sub>2</sub>(Piv)<sub>4</sub> (0.9 mg), chloroform (3.0 mL), reaction time is 15 min. The purification of the crude product by column chromatography on SiO<sub>2</sub> (DCM/EtOAc, gradient 24:1 to 22.5:2.5) afforded **5kn** as a colorless solid (73%, 61 mg), mp 212–214 °C. <sup>1</sup>H NMR (400 MHz, DMSO-*d*<sub>6</sub>): δ 9.24 (t, *J* = 5.4 Hz, 1H), 7.35 – 7.24 (m, 5H), 4.35 (d, *J* = 5.6 Hz, 1H), 3.97 – 3.85 (m, 2H), 3.72 – 3.60 (m, 9H), 3.48 (t, *J* = 11.4 Hz, 1H), 2.31 – 2.23 (m, 1H), 1.93 (d, *J* = 13.7 Hz, 1H), 1.83 (d, *J* = 13.3 Hz, 1H), 1.51 – 1.44 (m, 1H). <sup>13</sup>C {<sup>1</sup>H} NMR (100 MHz, DMSO-*d*<sub>6</sub>): δ 163.0, 160.1, 138.1, 128.3, 127.4, 127.1, 119.4, 117.2, 73.2, 65.6, 64.7, 63.2, 63.2, 52.0, 51.0, 43.9, 32.6, 32.1. HRMS (ESI) *m/z*: [M + H]<sup>+</sup> calcd. for C<sub>22</sub>H<sub>25</sub>N<sub>4</sub>O<sub>3</sub>S<sup>+</sup> 425.1642; found 425.1640.

***N*-Benzyl-1,4-dicyano-3-morpholino-2-thiaspiro[4.6]undec-3-ene-1-carboxamide (5ln)**

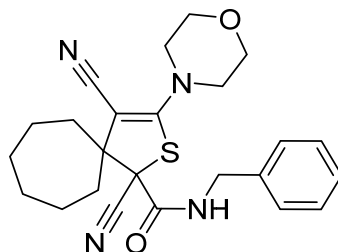

Product **5ln** was obtained according to the general procedure from 2-cycloheptylidene-3-morpholino-3-thioxopropanenitrile (**1l**) (75 mg, 1.0 equiv, 0.28 mmol), *N*-benzyl-2-cyano-2-diazoacetamide (**2n**) (85 mg, 1.5 equiv, 0.42 mmol), Rh<sub>2</sub>(Piv)<sub>4</sub> (1.3 mg), chloroform (3.0 mL), reaction time is 10 min. The purification of the crude product by column chromatography on SiO<sub>2</sub> (DCM/EtOAc, gradient 25:0 to 24:1) afforded **5ln** as a pale-yellow gum (71%, 88 mg), that crystallizes into powder when stored at 50 °C for 8 h, mp 176–177 °C. <sup>1</sup>H NMR (400 MHz, CDCl<sub>3</sub>-*d*): δ 7.39 – 7.29 (m, 5H), 6.69 (t, *J* = 4.9 Hz, 1H), 4.55 (dd, *J* = 14.5, 5.8 Hz, 1H), 4.39 (dd, *J* = 14.5, 5.0 Hz, 1H), 3.73 – 3.71 (m, 4H), 3.62 – 3.52 (m, 4H), 2.44 – 2.38 (m, 1H), 2.24 – 2.16 (m, 2H), 1.81 – 1.72 (m, 4H), 1.56 – 1.49 (m, 2H), 1.41 – 1.25 (m, 2H), 1.21 – 1.13 (m, 1H). <sup>13</sup>C {<sup>1</sup>H} NMR (100 MHz, CDCl<sub>3</sub>-*d*): δ 160.7, 160.1, 136.3, 129.1, 128.4, 128.3, 118.5, 117.8, 80.9, 66.3,

64.4, 60.1, 51.2, 45.4, 37.1, 33.4, 31.1, 30.9, 24.2, 23.5. HRMS (ESI)  $m/z$ :  $[M + H]^+$  calcd. for  $C_{24}H_{29}N_4O_2S^+$  437.2006; found 437.1999.

***N*-Benzyl-1,4-dicyano-3-morpholino-2-thiaspiro[4.7]dodec-3-ene-1-carboxamide (5on)**

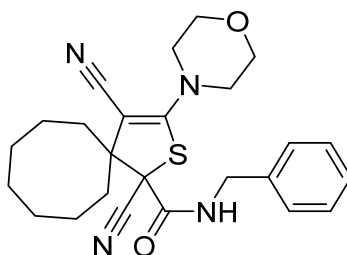

Product **5on** was obtained according to the general procedure from 2-cyclooctylidene-3-morpholino-3-thioxopropanenitrile (**1o**) (50 mg, 1.0 equiv, 0.18 mmol), *N*-benzyl-2-cyano-2-diazoacetamide (**2n**) (54 mg, 1.5 equiv, 0.27 mmol),  $Rh_2(Piv)_4$  (0.8 mg), chloroform (3.0 mL), reaction time is 60 min. The purification of the crude product by column chromatography on  $SiO_2$  (DCM/EtOAc, gradient 24:1 to 23:2) afforded **5on** as a pale-yellow gum (79%, 64 mg).  $^1H$  NMR (400 MHz,  $CDCl_3-d$ ):  $\delta$  7.38 – 7.29 (m, 5H), 6.63 (br. s, 1H, NH), 4.54 (dd,  $J = 14.3, 5.7$  Hz, 1H), 4.42 (dd,  $J = 14.4, 5.0$  Hz, 1H), 3.72 (br. s, 4H), 3.63 – 3.55 (m, 4H), 2.43 – 2.36 (m, 1H), 2.30 – 2.25 (m, 1H), 2.17 – 2.13 (m, 1H), 1.80 – 1.57 (m, 9H), 1.47 – 1.39 (m, 2H).  $^{13}C\{^1H\}$  NMR (100 MHz,  $CDCl_3-d$ ): 162.0, 160.7, 136.5, 129.1, 128.4, 128.2, 118.7, 117.1, 78.7, 66.3, 60.3, 51.3, 45.2, 32.3, 29.6, 28.7, 28.1, 25.3, 23.0, 22.9. HRMS (ESI)  $m/z$ :  $[M + H]^+$  calcd. for  $C_{25}H_{31}N_4O_2S^+$  451.2162; found 451.2165.

***N*-Benzyl-1,4-dicyano-3-(pyrrolidin-1-yl)-2-thiaspiro[4.7]dodec-3-ene-1-carboxamide (5qn)**

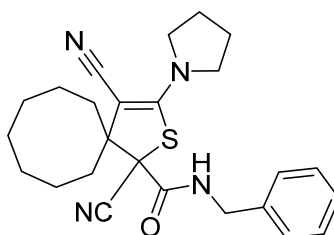

Product **5qn** was obtained according to the general procedure from 2-cyclooctylidene-3-(pyrrolidin-1-yl)-3-thioxopropanenitrile (**1q**) (40 mg, 1.0 equiv, 0.15 mmol), *N*-benzyl-2-cyano-2-diazoacetamide (**2n**) (46 mg, 1.5 equiv, 0.23 mmol),  $Rh_2(Piv)_4$  (0.7 mg), chloroform (3.0 mL), reaction time is 10 min. The purification of the crude product by column chromatography on  $SiO_2$  (PE/EtOAc, gradient 25:0 to 37.5:12.5) afforded **5qn** as a colorless solid (91%, 60 mg), mp 87–89 °C.  $^1H$  NMR (400 MHz,  $CDCl_3-d$ ):  $\delta$  7.38 – 7.29 (m, 5H), 6.71 (t,  $J = 5.1$  Hz, 1H), 4.54 (dd,  $J = 14.6, 5.9$  Hz, 1H), 4.43 (dd,  $J = 14.6, 5.4$  Hz, 1H), 3.62 (br. s, 4H), 2.44 – 2.38 (m, 1H), 2.29 – 2.23 (m, 1H), 2.16 – 2.10 (m, 1H), 1.96 – 1.94 (m, 4H), 1.78 – 1.73 (m, 2H), 1.68 – 1.56 (m, 7H),

1.47 – 1.36 (m, 2H).  $^{13}\text{C}\{^1\text{H}\}$  NMR (100 MHz,  $\text{CDCl}_3$ -*d*): 162.4, 156.8, 136.7, 129.0, 128.2, 128.1, 120.2, 117.2, 73.6, 60.3, 52.0, 45.0, 32.7, 30.0, 28.7, 28.2, 25.7, 25.4, 23.1, 22.9. HRMS (ESI) *m/z*:  $[\text{M} + \text{H}]^+$  calcd. for  $\text{C}_{25}\text{H}_{31}\text{N}_4\text{O}_3^+$  435.2213; found 435.2216.

#### 1-Acetyl-4-cyano-3-morpholino-*N*-phenyl-2-thiaspiro[4.4]non-3-ene-1-carboxamide (**5ih**)

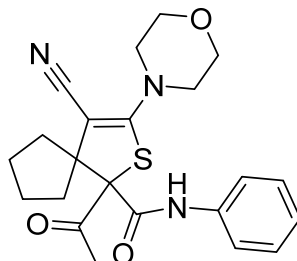

Product **5ih** was obtained according to the general procedure from 2-cyclopentylidene-3-morpholino-3-thioxopropanenitrile (**1i**) (155 mg, 1.0 equiv, 0.65 mmol), 2-diazo-3-oxo-*N*-phenylbutanamide (**2h**) (199 mg, 1.5 equiv, 0.98 mmol),  $\text{Rh}_2(\text{Piv})_4$  (3.0 mg), chloroform (3.5 mL), reaction time is 13 h. The purification of the crude product by column chromatography on  $\text{SiO}_2$  (DCM/EtOAc, gradient 25:0 to 23.8:1.2) with subsequent centrifugation with *n*-hexane afforded **5ih** as a colorless powder (74%, 199 mg), mp 154–155 °C.  $^1\text{H}$  NMR (400 MHz,  $\text{CDCl}_3$ -*d*):  $\delta$  8.27 (s, 1H, NH), 7.50 (d,  $J = 8.1$  Hz, 2H), 7.37 (t,  $J = 7.5$  Hz, 2H), 7.20 (t,  $J = 6.9$  Hz, 1H), 3.74 (br. s, 4H), 3.64 – 3.52 (m, 4H), 2.46 – 2.41 (m, 1H), 2.36 (s, 3H), 2.15 – 2.07 (m, 2H), 1.98 – 1.71 (m, 4H), 1.62 – 1.56 (m, 1H).  $^{13}\text{C}\{^1\text{H}\}$  NMR (100 MHz,  $\text{CDCl}_3$ -*d*): 197.1, 164.3, 158.5, 136.5, 129.4, 125.8, 120.6, 118.3, 84.0, 78.5, 66.39, 62.8, 51.0, 38.7, 34.1, 27.2, 25.3, 24.7. HRMS (ESI) *m/z*:  $[\text{M} + \text{H}]^+$  calcd. for  $\text{C}_{22}\text{H}_{25}\text{N}_3\text{O}_3\text{SNa}^+$  434.1509; found 434.1511.

#### 1-Acetyl-4-cyano-3-morpholino-*N*-phenyl-2-thiaspiro[4.5]dec-3-ene-1-carboxamide (**5jh**)

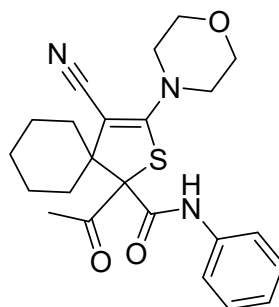

Product **5jh** was obtained according to the general procedure from 2-cyclohexylidene-3-morpholino-3-thioxopropanenitrile (**1j**) (128 mg, 1.0 equiv, 0.50 mmol), 2-diazo-3-oxo-*N*-phenylbutanamide (**2h**) (156 mg, 1.5 equiv, 0.77 mmol),  $\text{Rh}_2(\text{Piv})_4$  (2.3 mg), chloroform (3.5 mL), reaction time is 14 h. The purification of the crude product by column chromatography on  $\text{SiO}_2$  (PE/EtOAc, gradient 25:0 to 25:25) afforded **5jh** as a colorless powder (82%, 178 mg), mp 198–

200 °C. <sup>1</sup>H NMR (400 MHz, CDCl<sub>3</sub>-*d*): δ 8.60 (s, 1H), 7.50 (d, *J* = 7.9 Hz, 2H), 7.36 (t, *J* = 7.7 Hz, 2H), 7.18 (t, *J* = 7.4 Hz, 1H), 3.79 – 3.72 (m, 4H), 3.70 – 3.56 (m, 4H), 2.45 (s, 3H), 2.36 – 2.29 (m, 1H), 2.23 – 2.16 (m, 1H), 2.03 – 1.96 (m, 1H), 1.77 – 1.67 (m, 5H), 1.62 – 1.55 (m, 1H), 1.18 – 1.07 (m, 1H). <sup>13</sup>C{<sup>1</sup>H} NMR (100 MHz, CDCl<sub>3</sub>-*d*): δ 200.5, 163.6, 163.4, 136.8, 129.3, 125.5, 120.6, 119.9, 81.5, 79.3, 66.5, 55.4, 51.3, 34.4, 31.0, 29.6, 25.2, 22.6. HRMS (ESI) *m/z*: [M + H]<sup>+</sup> calcd. for C<sub>23</sub>H<sub>28</sub>N<sub>3</sub>O<sub>3</sub>S<sup>+</sup> 426.1846; found 426.1840.

**1-Acetyl-4-cyano-3-morpholino-*N*-phenyl-2-thiaspiro[4.6]undec-3-ene-1-carboxamide (5lh)**

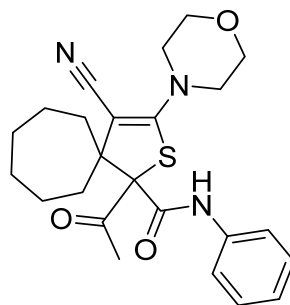

Product **5lh** was obtained according to the general procedure from 2-cycloheptylidene-3-morpholino-3-thioxopropanenitrile (**1l**) (80 mg, 1.0 equiv, 0.30 mmol), 2-diazo-3-oxo-*N*-phenylbutanamide (**2h**) (92 mg, 1.5 equiv, 0.45 mmol), Rh<sub>2</sub>(Piv)<sub>4</sub> (1.4 mg), chloroform (2.0 mL), reaction time is 14 h. The purification of the crude product by column chromatography on SiO<sub>2</sub> (DCM/EtOAc, gradient 25:0 to 23.5:1.5) afforded **5lh** as a colorless powder (92%, 123 mg), mp 174–175 °C. <sup>1</sup>H NMR (400 MHz, CDCl<sub>3</sub>-*d*): δ 8.51 (s, 1H, NH), 7.50 (d, *J* = 7.8 Hz, 2H), 7.37 (t, *J* = 7.8 Hz, 2H), 7.19 (t, *J* = 7.4 Hz, 1H), 3.78 – 3.70 (m, 4H), 3.66 – 3.54 (m, 4H), 2.57 – 2.46 (m, 1H), 2.41 (s, 3H), 2.38 – 2.32 (m, 1H), 2.05 – 1.99 (m, 2H), 1.80 – 1.73 (m, 3H), 1.68 – 1.55 (m, 2H), 1.48 – 1.31 (m, 3H). <sup>13</sup>C{<sup>1</sup>H} NMR (100 MHz, CDCl<sub>3</sub>-*d*): 198.8, 164.2, 160.4, 136.8, 129.4, 125.6, 120.6, 119.1, 83.5, 80.9, 66.5, 58.9, 51.2, 35.8, 34.1, 30.8, 30.6, 28.5, 24.7, 24.1. HRMS (ESI) *m/z*: [M + H]<sup>+</sup> calcd. for C<sub>24</sub>H<sub>29</sub>N<sub>3</sub>O<sub>3</sub>SNa<sup>+</sup> 462.1822; found 462.1823.

**1-Acetyl-4-cyano-3-morpholino-*N*-phenyl-2-thiaspiro[4.7]dodec-3-ene-1-carboxamide (5oh)**

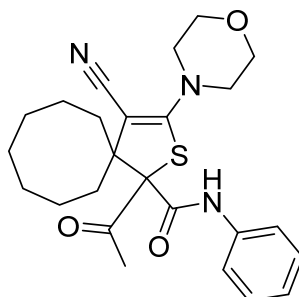

Product **5oh** was obtained according to the general procedure from 2-cyclooctylidene-3-morpholino-3-thioxopropanenitrile (**1o**) (80 mg, 1.0 equiv, 0.29 mmol), 2-diazo-3-oxo-*N*-



phenylbutanamide (**2h**) (87 mg, 1.5 equiv, 0.43 mmol), Rh<sub>2</sub>(Piv)<sub>4</sub> (1.3 mg), chloroform (2.0 mL), reaction time is 14 h. The purification of the crude product by column chromatography on SiO<sub>2</sub> (DCM/EtOAc, gradient 25:0 to 23.5:1.5) afforded **5oh** as a colorless powder (75%, 98 mg), mp 241–243 °C. <sup>1</sup>H NMR (400 MHz, CDCl<sub>3</sub>-*d*): δ 8.88 (s, 1H, NH), 7.51 (d, *J* = 7.8 Hz, 2H), 7.36 (t, *J* = 7.8 Hz, 2H), 7.17 (t, *J* = 7.4 Hz, 1H), 3.79 – 3.58 (m, 8H), 2.51 (s, 3H), 2.31 – 2.10 (m, 3H), 1.99 – 1.92 (m, 1H), 1.73 – 1.40 (m, 10H). <sup>13</sup>C{<sup>1</sup>H} NMR (100 MHz, CDCl<sub>3</sub>-*d*): 203.2, 163.4, 161.9, 136.9, 129.3, 125.4, 120.4, 119.4, 82.2, 81.0, 66.5, 59.9, 51.2, 31.6, 30.6, 30.2, 28.7, 28.2, 25.9, 23.2, 23.2. HRMS (ESI) *m/z*: [M + H]<sup>+</sup> calcd. for C<sub>25</sub>H<sub>32</sub>N<sub>3</sub>O<sub>3</sub>S<sup>+</sup> 454.2159; found 454.2155.

**1-Acetyl-4-cyano-N-phenyl-3-(piperidin-1-yl)-2-thiaspiro[4.6]undec-3-ene-1-carboxamide (5ph)**

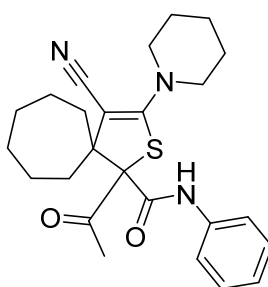

Product **5ph** was obtained according to the general procedure from 2-cycloheptylidene-3-(piperidin-1-yl)-3-thioxopropanenitrile (**1p**) (60 mg, 1.0 equiv, 0.23 mmol), 2-diazo-3-oxo-*N*-phenylbutanamide (**2h**) (70 mg, 1.5 equiv, 0.34 mmol), Rh<sub>2</sub>(Piv)<sub>4</sub> (1.0 mg), chloroform (2.0 mL), reaction time is 14 h. The purification of the crude product by column chromatography on SiO<sub>2</sub> (PE/EtOAc, gradient 25:0 to 37.5:12.5) afforded **5ph** as a colorless powder (79%, 79 mg), mp 79–81 °C. <sup>1</sup>H NMR (400 MHz, CDCl<sub>3</sub>-*d*): δ 8.59 (s, 1H, NH), 7.52 (d, *J* = 7.6 Hz, 2H), 7.38 (t, *J* = 7.9 Hz, 2H), 7.19 (t, *J* = 7.4 Hz, 1H), 3.65 – 3.60 (m, 4H), 2.50 – 2.32 (m, 5H), 2.12 – 1.96 (m, 2H), 1.82 – 1.59 (m, 11H), 1.53 – 1.45 (m, 2H), 1.39 – 1.32 (m, 1H). <sup>13</sup>C{<sup>1</sup>H} NMR (100 MHz, CDCl<sub>3</sub>-*d*): 199.4, 164.8, 160.6, 136.8, 129.2, 125.3, 120.4, 119.8, 81.1, 80.4, 58.3, 52.6, 35.9, 34.1, 30.6, 30.2, 28.7, 26.1, 24.5, 24.3, 24.0. HRMS (ESI) *m/z*: [M + H]<sup>+</sup> calcd. for C<sub>25</sub>H<sub>32</sub>N<sub>3</sub>O<sub>2</sub>S<sup>+</sup> 438.2201; found 438.2212.

**1-Acetyl-4-cyano-N-phenyl-3-(piperidin-1-yl)-2-thiaspiro[4.7]dodec-3-ene-1-carboxamide (5rh)**

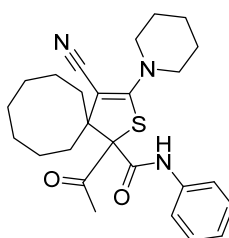

Product **5rh** was obtained according to the general procedure from 2-cyclooctylidene-3-(piperidin-1-yl)-3-thioxopropanenitrile (**1r**) (90 mg, 1.0 equiv, 0.32 mmol), 2-diazo-3-oxo-*N*-phenylbutanamide (**2h**) (99 mg, 1.5 equiv, 0.49 mmol), Rh<sub>2</sub>(Piv)<sub>4</sub> (1.5 mg), chloroform (2.0 mL), reaction time is 14 h. The purification of the crude product by column chromatography on SiO<sub>2</sub> (PE/EtOAc, gradient 25:0 to 37.5:12.5) afforded **5rh** as a colorless powder (76%, 112 mg), mp 155–157 °C. <sup>1</sup>H NMR (400 MHz, CDCl<sub>3</sub>-*d*): δ 8.90 (s, 1H, NH), 7.51 (d, *J* = 7.7 Hz, 2H), 7.36 (t, *J* = 7.9 Hz, 2H), 7.16 (t, *J* = 7.4 Hz, 1H), 3.66 – 3.58 (m, 4H), 2.51 (s, 3H), 2.35 – 2.08 (m, 3H), 1.99 – 1.93 (m, 1H), 1.77 – 1.68 (m, 10H), 1.60 – 1.39 (m, 6H). <sup>13</sup>C {<sup>1</sup>H} NMR (100 MHz, CDCl<sub>3</sub>-*d*): the product decomposes while recording a carbon spectrum. HRMS (ESI) *m/z*: [M + H]<sup>+</sup> calcd. for C<sub>26</sub>H<sub>34</sub>N<sub>3</sub>O<sub>2</sub>S<sup>+</sup> 452.2366; found 452.2369.

**1-Acetyl-3-(azepan-1-yl)-4-cyano-*N*-phenyl-2-thiaspiro[4.7]dodec-3-ene-1-carboxamide (5sh)**

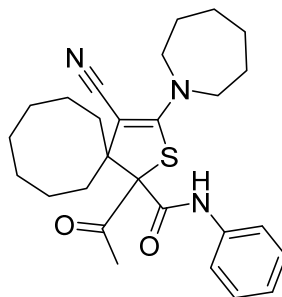

Product **5sh** was obtained according to the general procedure from 2-cyclooctylidene-3-(piperidin-1-yl)-3-thioxopropanenitrile (**1s**) (90 mg, 1.0 equiv, 0.31 mmol), 2-diazo-3-oxo-*N*-phenylbutanamide (**2h**) (94 mg, 1.5 equiv, 0.46 mmol), Rh<sub>2</sub>(Piv)<sub>4</sub> (1.4 mg), chloroform (2.0 mL), reaction time is 14 h. The purification of the crude product by column chromatography on SiO<sub>2</sub> (PE/EtOAc, gradient 25:0 to 37.5:12.5) afforded **5sh** as a colorless powder (83%, 119 mg), mp 160–162 °C. <sup>1</sup>H NMR (400 MHz, CDCl<sub>3</sub>-*d*): δ 8.93 (s, 1H, NH), 7.51 (d, *J* = 7.7 Hz, 2H), 7.35 (t, *J* = 7.9 Hz, 2H), 7.16 (t, *J* = 7.4 Hz, 1H), 3.74 – 3.64 (m, 4H), 2.53 (s, 3H), 2.35 – 2.29 (m, 1H), 2.24 – 2.18 (m, 2H), 2.11 – 2.05 (m, 1H), 2.00 – 1.93 (m, 1H), 1.87 – 1.81 (m, 4H), 1.78 – 1.41 (m, 14H). <sup>13</sup>C {<sup>1</sup>H} NMR (100 MHz, CDCl<sub>3</sub>-*d*): 203.8, 164.1, 161.0, 137.1, 129.3, 125.2, 120.7, 120.4, 83.0, 75.6, 59.6, 54.3, 31.8, 30.8, 30.7, 29.1, 28.9, 28.3, 26.9, 26.0, 23.4, 23.3. HRMS (ESI) *m/z*: [M + H]<sup>+</sup> calcd. for C<sub>27</sub>H<sub>36</sub>N<sub>3</sub>O<sub>2</sub>S<sup>+</sup> 466.2522; found 466.2524.

**7''-Methyl-5'-morpholino-2''-oxodispiro[cyclohexane-1,3'-thiophene-2',3''-indoline]-4'-carbonitrile (5jp)**

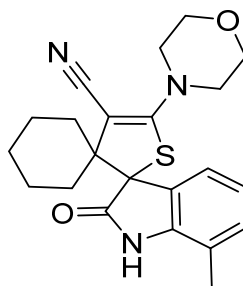

Product **5jp** was obtained according to the general procedure from 2-cyclohexylidene-3-morpholino-3-thioxopropanenitrile (**1j**) (40 mg, 1.0 equiv, 0.16 mmol), 3-diazo-7-methylindolin-2-one (**2p**) (41 mg, 1.5 equiv, 0.24 mmol), Rh<sub>2</sub>(Piv)<sub>4</sub> (0.70 mg), chloroform (2.0 mL), reaction time is 1 h. The purification of the crude product by column chromatography on SiO<sub>2</sub> (PE/EtOAc, gradient 30:20 to 20:30) afforded **5jp** as a colorless powder (75%, 47 mg), mp 222–223 °C. <sup>1</sup>H NMR (400 MHz, CDCl<sub>3</sub>-*d*): δ 9.62 (s, 1H), 7.26 (d, *J* = 7.3 Hz, 1H), 7.11 (d, *J* = 7.6 Hz, 1H), 6.96 (t, *J* = 7.5 Hz, 1H), 3.78 – 3.58 (m, 7H), 2.32 (s, 3H), 2.25 (d, *J* = 9.9 Hz, 1H), 2.14 – 2.00 (m, 2H), 1.70 – 1.61 (m, 4H), 1.51 (d, *J* = 14.1 Hz, 1H), 1.31 – 1.23 (m, 1H), 1.07 – 0.97 (m, 1H). <sup>13</sup>C{<sup>1</sup>H} NMR (100 MHz, CDCl<sub>3</sub>-*d*): δ 178.0, 165.6, 140.2, 131.4, 124.7, 124.3, 122.4, 121.0, 120.1, 78.1, 66.7, 66.5, 55.2, 51.4, 34.0, 30.5, 25.3, 22.3, 22.3, 16.5. HRMS (ESI) *m/z*: [M + H]<sup>+</sup> calcd. for C<sub>22</sub>H<sub>26</sub>N<sub>3</sub>O<sub>2</sub>S<sup>+</sup> 396.1740; found 396.1740.

**7-Methyl-5'-morpholino-2-oxo-2'',3'',5'',6''-tetrahydrodispiro[indoline-3,2'-thiophene-3',4''-pyran]-4'-carbonitrile (5kp)**

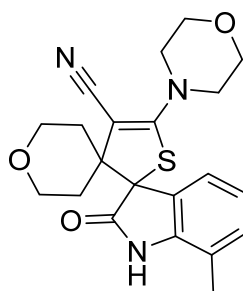

Product **5kp** was obtained according to the general procedure from 3-morpholino-2-(tetrahydro-4*H*-pyran-4-ylidene)-3-thioxopropanenitrile (**1k**) (41 mg, 1.0 equiv, 0.15 mmol), 3-diazo-7-methylindolin-2-one (**2p**) (39 mg, 1.5 equiv, 0.24 mmol), Rh<sub>2</sub>(Piv)<sub>4</sub> (0.70 mg), chloroform (2.0 mL), 40 °C, reaction time is 30 min. The purification of the crude product by column chromatography on SiO<sub>2</sub> (PE/EtOAc, gradient 30:20 to 40:10) afforded **5kp** as a colorless powder (89%, 56 mg), mp 288–290 °C. <sup>1</sup>H NMR (400 MHz, DMSO-*d*<sub>6</sub>): δ 10.82 (s, 1H), 7.25 (d, *J* = 7.5 Hz, 1H), 7.13 (d, *J* = 7.6 Hz, 1H), 6.95 (t, *J* = 7.6 Hz, 1H), 3.87 (t, *J* = 11.1 Hz, 1H), 3.71 – 3.63

(m, 6H), 3.60 – 3.54 (m, 4H), 2.20 (s, 3H), 1.98 – 1.92 (m, 1H), 1.85 – 1.78 (m, 2H), 1.51 – 1.44 (m, 1H).  $^{13}\text{C}\{^1\text{H}\}$  NMR (100 MHz, DMSO-*d*<sub>6</sub>):  $\delta$  174.7, 165.3, 140.6, 131.2, 123.7, 123.7, 121.5, 120.2, 119.7, 74.7, 65.6, 63.1, 51.3, 50.8, 33.7, 30.6, 16.1. HRMS (ESI) *m/z*:  $[\text{M} + \text{H}]^+$  calcd. for  $\text{C}_{21}\text{H}_{24}\text{N}_3\text{O}_3\text{S}^+$  398.1533; found 398.1530.

**7''-Methyl-5'-morpholino-2''-oxodispiro[cycloheptane-1,3'-thiophene-2',3''-indoline]-4'-carbonitrile (5lp)**

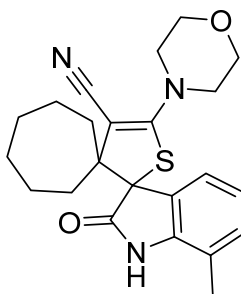

Product **5lp** was obtained according to the general procedure from 2-cycloheptylidene-3-morpholino-3-thioxopropanenitrile (**1l**) (39 mg, 1.0 equiv, 0.15 mmol), 3-diazo-7-methylindolin-2-one (**2p**) (39 mg, 1.5 equiv, 0.23 mmol),  $\text{Rh}_2(\text{Piv})_4$  (0.68 mg), chloroform (2.0 mL), reaction time is 20 min. The purification of the crude product by column chromatography on  $\text{SiO}_2$  (PE/EtOAc, gradient 30:20 to 25:25) afforded **5lp** as a colorless powder (79%, 49 mg), mp 209–211 °C.  $^1\text{H}$  NMR (400 MHz,  $\text{CDCl}_3$ -*d*):  $\delta$  9.34 (s, 1H), 7.29 (d, *J* = 7.6 Hz, 1H), 7.10 (d, *J* = 7.6 Hz, 1H), 6.94 (t, *J* = 7.6 Hz, 1H), 3.78 – 3.76 (m, 4H), 3.69 – 3.57 (m, 4H), 2.31 (s, 3H), 2.27 – 2.18 (m, 2H), 2.00 – 1.94 (m, 1H), 1.86 – 1.73 (m, 2H), 1.66 – 1.53 (m, 2H), 1.46 – 1.41 (m, 3H), 1.25 – 1.14 (m, 2H).  $^{13}\text{C}\{^1\text{H}\}$  NMR (100 MHz,  $\text{CDCl}_3$ -*d*):  $\delta$  178.0, 163.1, 139.9, 131.4, 125.1, 124.2, 122.6, 120.0, 81.4, 66.6, 66.0, 59.6, 51.2, 35.0, 34.6, 31.0, 30.8, 24.4, 24.2, 16.6. HRMS (ESI) *m/z*:  $[\text{M} + \text{H}]^+$  calcd. for  $\text{C}_{23}\text{H}_{28}\text{N}_3\text{O}_2\text{S}^+$  410.1897; found 410.1897.

**7''-Methyl-5'-morpholino-2''-oxodispiro[cyclooctane-1,3'-thiophene-2',3''-indoline]-4'-carbonitrile (5op)**

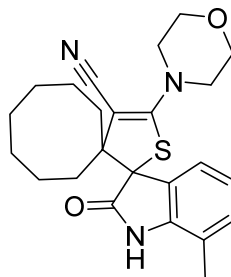

A 10 mL standard microwave vial was charge with  $\text{Rh}_2(\text{Piv})_4$  (0.60 mg, 1.0 mol %), 2-cyclooctylidene-3-morpholino-3-thioxopropanenitrile (**1o**) (40 mg, 1.0 equiv, 0.14 mmol) and dry

chloroform (1 mL). A solution of diazocompound **2p** (37 mg, 1.5 equiv, 0.21 mmol) in dry chloroform (1 mL) was added slowly to the vial at room temperature. The reaction solution was stirred for 20 min at room temperature, and then a portion of **2p** (25 mg, 1.0 equiv, 0.14 mmol) in 0.5 mL dry chloroform was added. The reaction solution was stirred for 40 min at room temperature, and then the solution was directly subjected to SiO<sub>2</sub>. The purification of the crude product by column chromatography on SiO<sub>2</sub> (PE/EtOAc, gradient 30:20 to 40:10) with subsequent centrifugation with cold diethyl ether afforded **5op** as a colorless powder (57%, 35 mg), mp 228–230 °C. <sup>1</sup>H NMR (400 MHz, CDCl<sub>3</sub>-*d*): δ 9.49 (s, 1H), 7.32 (d, *J* = 7.5 Hz, 1H), 7.09 (d, *J* = 7.6 Hz, 1H), 6.96 (t, *J* = 7.6 Hz, 1H), 3.77 – 3.75 (m, 4H), 3.70 – 3.58 (m, 4H), 2.45 – 2.37 (m, 1H), 2.29 (s, 3H), 2.24 – 2.21 (m, 2H), 2.06 – 2.00 (m, 1H), 1.66 (br. s, 1H), 1.55 (br. s, 4H), 1.47 – 1.42 (m, 1H), 1.32 (br. s, 3H), 0.91 (br. s, 1H). <sup>13</sup>C{<sup>1</sup>H} NMR (100 MHz, CDCl<sub>3</sub>-*d*): δ 178.3, 163.4, 139.6, 131.3, 124.0, 122.5, 120.1, 120.0, 79.7, 66.6, 66.2, 58.8, 51.3, 30.1, 29.7, 29.3, 28.0, 25.4, 22.9, 22.1, 16.5. HRMS (ESI) *m/z*: [M + H]<sup>+</sup> calcd. for C<sub>24</sub>H<sub>30</sub>N<sub>3</sub>O<sub>2</sub>S<sup>+</sup> 424.2053; found 424.2055.

**1-Methyl-13-morpholino-4-oxo-3-phenyl-14-thia-2,3-diazadispiro[4.0.5<sup>6</sup>.3<sup>5</sup>]tetradeca-1,12-diene-12-carbonitrile (**5jq**)**

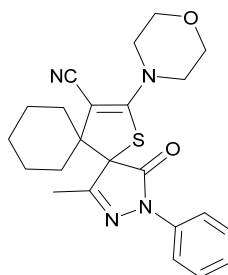

Product **5jq** was obtained according to the general procedure from 2-cyclohexylidene-3-morpholino-3-thioxopropanenitrile (**1j**) (40 mg, 1.0 equiv, 0.16 mmol), 4-diazo-5-methyl-2-phenyl-2,4-dihydro-3*H*-pyrazol-3-one (**2q**) (48 mg, 1.5 equiv, 0.23 mmol), Rh<sub>2</sub>(Piv)<sub>4</sub> (0.70 mg), chloroform (2.0 mL), 60 °C, reaction time is 1 h. The purification of the crude product by column chromatography on SiO<sub>2</sub> (DCM/EtOAc, gradient 25:0 to 20:5) afforded **5jq** as a pale-yellow oil (79%, 53 mg). <sup>1</sup>H NMR (400 MHz, CDCl<sub>3</sub>-*d*): δ 7.88 (d, *J* = 7.8 Hz, 2H), 7.40 (t, *J* = 8.0 Hz, 2H), 7.20 (t, *J* = 7.4 Hz, 1H), 3.82 – 3.67 (m, 6H), 3.62 – 3.57 (m, 2H), 2.30 (s, 3H), 2.19 – 2.15 (m, 1H), 2.10 – 2.02 (m, 2H), 1.95 – 1.91 (m, 1H), 1.73 – 1.68 (m, 1H), 1.65 – 1.59 (m, 2H), 1.51 – 1.47 (m, 1H), 1.39 – 1.32 (m, 1H), 1.21 – 1.15 (m, 1H). <sup>13</sup>C{<sup>1</sup>H} NMR (100 MHz, CDCl<sub>3</sub>-*d*): δ 167.6, 163.9, 159.6, 137.6, 129.0, 125.7, 119.8, 119.0, 78.2, 68.5, 66.6, 55.6, 51.5, 32.6, 31.1, 25.1, 22.4, 22.4, 16.3. HRMS (ESI) *m/z*: [M + H]<sup>+</sup> calcd. for C<sub>23</sub>H<sub>27</sub>N<sub>4</sub>O<sub>2</sub>S<sup>+</sup> 423.1849; found 423.1853.

### Dimethyl 4-cyano-5-morpholino-3-phenylthiophene-2,2(3*H*)-dicarboxylate (**5as**)

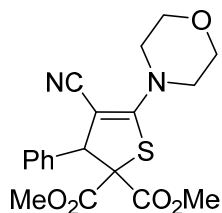

Product **5as** was obtained according to the general procedure from 2-(morpholine-4-carbonothioyl)-3-phenylacrylonitrile (**1a**) (50 mg, 1.0 equiv, 0.19 mmol), dimethyl 2-diazomalonate (**2s**) (46 mg, 1.5 equiv, 0.29 mmol), Rh<sub>2</sub>(Piv)<sub>4</sub> (0.90 mg), chloroform (2.0 mL), 45 °C, reaction time is 1 h. The purification of the crude product by column chromatography on SiO<sub>2</sub> (PE/EtOAc, gradient 25:0 to 20:30) afforded **5as** as a colorless powder (95%, 71 mg), mp 153–154 °C. <sup>1</sup>H NMR (400 MHz, DMSO-*d*<sub>6</sub>): δ 7.35 (br. s, 5H), 4.89 (s, 1H), 3.81 (s, 6H), 3.69 (br. s, 4H), 3.57 (br. s, 4H). <sup>13</sup>C {<sup>1</sup>H} NMR (100 MHz, DMSO-*d*<sub>6</sub>): δ 168.1, 165.0, 160.6, 136.2, 128.6, 128.5, 128.4, 118.3, 71.8, 68.9, 65.5, 56.7, 54.1, 53.2, 50.2. HRMS (ESI) *m/z*: [M + H]<sup>+</sup> calcd. for C<sub>19</sub>H<sub>21</sub>N<sub>2</sub>O<sub>5</sub>S<sup>+</sup> 389.1165; found 389.1164.

### Trimethyl 5-morpholino-3-phenylthiophene-2,2,4(3*H*)-tricarboxylate (**5xs**)

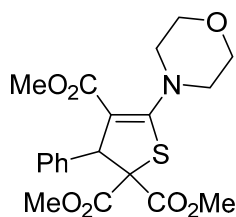

Product **5xs** was obtained according to the general procedure from methyl 2-(morpholine-4-carbonothioyl)-3-phenylacrylate (**1x**) (58 mg, 1.0 equiv, 0.20 mmol), dimethyl 2-diazomalonate (**2s**) (47 mg, 1.5 equiv, 0.30 mmol), Rh<sub>2</sub>(Piv)<sub>4</sub> (0.90 mg), chloroform (2.0 mL), 45 °C, reaction time is 1 h. The purification of the crude product by column chromatography on SiO<sub>2</sub> (PE/EtOAc, gradient 25:0 to 25:25) with subsequent centrifugation with cold diethyl ether afforded **5xs** as a colorless powder (69%, 58 mg), mp 173–176 °C. <sup>1</sup>H NMR (400 MHz, CDCl<sub>3</sub>-*d*): δ 7.37 (d, *J* = 7.0 Hz, 2H), 7.29 – 7.24 (m, 3H), 5.25 (s, 1H), 3.87 – 3.75 (m, 7H), 3.67 – 3.59 (m, 2H), 3.55 (s, 3H), 3.40 – 3.35 (m, 2H), 3.29 (s, 3H). <sup>13</sup>C {<sup>1</sup>H} NMR (100 MHz, CDCl<sub>3</sub>-*d*): δ 169.1, 166.1, 164.1, 162.9, 138.3, 128.7, 128.2, 127.9, 99.5, 69.2, 66.9, 57.1, 53.9, 53.1, 53.0, 51.1. HRMS (ESI) *m/z*: [M + H]<sup>+</sup> calcd. for C<sub>20</sub>H<sub>24</sub>NO<sub>7</sub>S<sup>+</sup> 422.1268; found 422.1271.

### Methyl 4-cyano-5-morpholino-2,3-diphenyl-2,3-dihydrothiophene-2-carboxylate (**5at**)

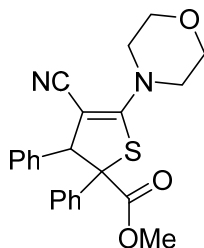

Product **5at** was obtained according to the general procedure from 2-(morpholine-4-carbonothioyl)-3-phenylacrylonitrile (**1a**) (50 mg, 1.0 equiv, 0.19 mmol), methyl 2-diazo-2-phenylacetate (**2t**) (41 mg, 1.2 equiv, 0.23 mmol), Rh<sub>2</sub>(Piv)<sub>4</sub> (0.70 mg), chloroform (2.0 mL), rt, reaction time is 15 min. The purification of the crude product by column chromatography on neutral alumina (PE/EtOAc, gradient 25:0 to 35:15) afforded **5at** as a colorless powder (76%, 60 mg), mp 68–70 °C, a mixture of diastereomers (dr 65:35). <sup>1</sup>H NMR (400 MHz, CDCl<sub>3</sub>-d): δ 7.59 (d, *J* = 7.3 Hz, 2H), 7.49 (d, *J* = 8.0 Hz, 2H), 7.45 – 7.30 (m, 7H), 7.12 – 6.93 (m, 6H), 5.24 (s, 0.56H), 4.75 (s, 1H), 3.83 – 3.81 (m, 4H), 3.74 – 3.70 (m, 6H), 3.62 – 3.55 (m, 4H), 3.26 (s, 3H). <sup>13</sup>C{<sup>1</sup>H} NMR (100 MHz, CDCl<sub>3</sub>-d): δ 172.5, 169.5, 162.5, 161.8, 141.8, 137.6, 136.3, 134.5, 129.3, 129.0, 128.6, 128.5, 128.4, 128.4, 128.0, 128.0, 127.8, 127.5, 127.2, 125.6, 119.1, 118.8, 75.2, 74.1, 73.1, 69.9, 66.4, 66.3, 60.0, 59.6, 53.7, 52.8, 50.8, 50.7. HRMS (ESI) *m/z*: [M + H]<sup>+</sup> calcd. for C<sub>23</sub>H<sub>23</sub>N<sub>2</sub>O<sub>3</sub>S<sup>+</sup> 407.1424; found 407.1423.

### Methyl 4-cyano-3-morpholino-1-phenyl-2-thiaspiro[4.7]dodec-3-ene-1-carboxylate (**5ot**)

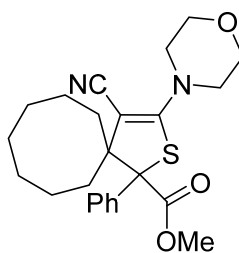

**Method A.** Product **5ot** was obtained according to the general procedure from 2-cyclooctylidene-3-morpholino-3-thioxopropanenitrile (**1o**) (50 mg, 1.0 equiv, 0.14 mmol), methyl 2-diazo-2-phenylacetate (**2t**) (30 mg, 1.2 equiv, 0.17 mmol), Rh<sub>2</sub>(Piv)<sub>4</sub> (0.70 mg), chloroform (2.0 mL), rt, reaction time is 60 min. The purification of the crude product by column chromatography on SiO<sub>2</sub> (PE/EtOAc, gradient 25:0 to 35:15) with subsequent centrifugation with a mixture of diethyl ether:hexane (0.4 mL : 1 mL) afforded **5ot** as a colorless powder (85%, 52 mg), mp 179–181 °C. <sup>1</sup>H NMR (400 MHz, CDCl<sub>3</sub>-d): δ 7.41 – 7.38 (m, 2H), 7.36 – 7.32 (m, 3H), 3.83 – 3.71 (m, 9H), 3.66 – 3.61 (m, 2H), 2.48 – 2.41 (m, 1H), 2.24 – 2.19 (m, 1H), 2.01 – 1.93 (m, 1H), 1.81 – 1.61 (m, 7H), 1.47 – 1.25 (m, 4H). <sup>13</sup>C{<sup>1</sup>H} NMR (100 MHz, CDCl<sub>3</sub>-d): δ 169.8, 163.6, 137.1, 128.5,

128.5, 127.4, 120.3, 80.7, 76.2, 66.7, 60.1, 53.2, 51.1, 30.7, 30.2, 29.7, 28.1, 25.8, 24.3, 22.8.  
HRMS (ESI) m/z: [M + H]<sup>+</sup> calcd. for C<sub>24</sub>H<sub>31</sub>N<sub>2</sub>O<sub>3</sub>S<sup>+</sup> 427.2050; found 427.2051.

**Method B.** To an oven-dried 50 mL standard screw glass vial (50 mL) [Cu(MeCN)<sub>4</sub>]CF<sub>3</sub>SO<sub>3</sub> (19 mg, 10 mol %), thioamide (**1o**) (70 mg, 1.0 equiv, 0.25 mmol), methyl 2-diazo-2-phenylacetate (**2t**) (88 mg, 2.0 equiv, 0.50 mmol) and dry chloroform (3.5 mL) were added. Then, the reaction mixture was allowed to stir at 90 °C for 24 h. The purification of the crude product by column chromatography on SiO<sub>2</sub> (PE/EtOAc, gradient 25:0 to 35:15) with subsequent centrifugation with a mixture diethyl ether:hexane (0.4 mL:1.0 mL) afforded **5ot** as a colorless powder (70%, 77 mg), mp 179–181 °C.



## General procedure for the synthesis of dihydrothiophenes 6

To an oven-dried 50 mL standard screw glass vial (50 mL)  $[\text{Cu}(\text{MeCN})_4]\text{CF}_3\text{SO}_3$  (10 mol %), thioamides (**1i,j,l,o**) (1.0 equiv), 2-diazo-3-oxo-*N*-phenylbutanamide (**2h**) (2.0 equiv) and dry chloroform were added. Then, the reaction mixture was allowed to stir at 90 °C for 24 h. Upon completion, the solution was directly subjected to  $\text{SiO}_2$  afforded **6**.

### 2-Acetyl-4-cyano-3-morpholino-*N*-phenyl-1-thiaspiro[4.4]non-3-ene-2-carboxamide (**6ih**)

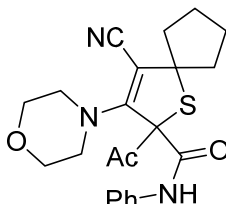

Product **6ih** was obtained according to the general procedure from 2-cyclopentylidene-3-morpholino-3-thioxopropanenitrile (**1i**) (203 mg, 1.0 equiv, 0.86 mmol), 2-diazo-3-oxo-*N*-phenylbutanamide (**2h**) (349 mg, 2.0 equiv, 1.72 mmol),  $[\text{Cu}(\text{MeCN})_4]\text{OTf}$  (65 mg), chloroform (6.0 mL), 90 °C, reaction time is 24 h. The purification of the crude product by column chromatography on  $\text{SiO}_2$  (DCM/EtOAc, gradient 25:0 to 23.5:1.5) afforded **6ih** as a yellow oily mass (116 mg). The latter was triturated with hexane:diethyl ether (1:1) and the formed precipitate was centrifugated afforded **6ih** as a colorless powder (23%, 80 mg), mp 164–166 °C. The second regioisomer was isolated by column chromatography on  $\text{SiO}_2$  (DCM/EtOAc, gradient up to 23:2) as a brown oily mass (144 mg). The trituration with hexane:diethyl ether (1:1) and centrifugation of the formed precipitate afforded **5ih** as a colorless powder (31%, 109 mg), mp 154–155 °C.  $^1\text{H}$  NMR (400 MHz,  $\text{CDCl}_3$ ):  $\delta$  9.29 (s, 1H), 7.54 (d,  $J = 7.6$  Hz, 2H), 7.36 (t,  $J = 7.9$  Hz, 2H), 7.17 (t,  $J = 7.4$  Hz, 1H), 3.71 – 3.62 (m, 4H), 3.58 – 3.52 (m, 2H), 3.38 – 3.33 (m, 2H), 2.49 (s, 3H), 2.35 – 2.20 (m, 2H), 2.16 – 2.11 (m, 1H), 2.02 – 1.97 (m, 1H), 1.87 – 1.80 (m, 2H), 1.76 – 1.68.  $^{13}\text{C}\{^1\text{H}\}$  NMR (100 MHz,  $\text{CDCl}_3$ ):  $\delta$  201.5, 165.7, 156.2, 137.2, 129.3, 125.3, 120.2, 117.4, 91.5, 71.8, 67.5, 66.5, 50.3, 42.4, 41.1, 26.6, 24.3, 24.0. HRMS (ESI)  $m/z$ :  $[\text{M} + \text{H}]^+$  calcd. for  $\text{C}_{22}\text{H}_{26}\text{N}_3\text{O}_3\text{S}^+$  412.1689; found 412.1687.

## 2-Acetyl-4-cyano-3-morpholino-*N*-phenyl-1-thiaspiro[4.5]dec-3-ene-2-carboxamide (**6jh**)

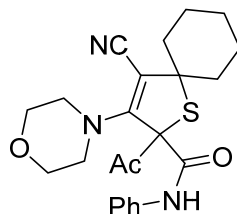

Product **6jh** was obtained according to the general procedure from 2-cyclohexylidene-3-morpholino-3-thioxopropanenitrile (**1j**) (192 mg, 1.0 equiv, 0.77 mmol), 2-diazo-3-oxo-*N*-phenylbutanamide (**2h**) (312 mg, 2.0 equiv, 1.53 mmol), [Cu(MeCN)<sub>4</sub>]OTf (58 mg), chloroform (6.0 mL), 90 °C, reaction time is 24 h. The purification of the crude product by column chromatography on SiO<sub>2</sub> (DCM/EtOAc, gradient 25:0 to 23.5:1.5) afforded **6jh** as a yellow oily mass (253 mg). The latter was triturated with hexane:diethyl ether (1:1) and the formed precipitate was centrifugated afforded **6jh** as a colorless powder (57%, 185 mg), mp 195–196 °C. The second regioisomer was isolated by column chromatography on SiO<sub>2</sub> (DCM/EtOAc, gradient up to 23:2) as a brown gum (30 mg). The trituration with hexane:diethyl ether (1:1) and centrifugation of the formed precipitate afforded **6jh** as a colorless powder (5%, 16 mg), mp 198–200 °C. <sup>1</sup>H NMR (400 MHz, CDCl<sub>3</sub>): δ 9.35 (s, 1H), 7.54 (d, *J* = 7.5 Hz, 2H), 7.36 (t, *J* = 7.5 Hz, 2H), 7.17 (t, *J* = 6.4 Hz, 1H), 3.67 – 3.62 (m, 4H), 3.57 – 3.51 (m, 2H), 3.37 – 3.32 (m, 2H), 2.49 (s, 3H), 2.04 – 1.96 (m, 3H), 1.88 – 1.79 (m, 3H), 1.67 (d, *J* = 13.4 Hz, 1H), 1.47 – 1.30 (m, 2H), 1.26 – 1.14 (m, 1H). <sup>13</sup>C{<sup>1</sup>H} NMR (100 MHz, CDCl<sub>3</sub>): δ 201.7, 165.9, 155.8, 137.2, 129.3, 125.3, 120.2, 117.6, 93.9, 71.0, 66.5, 63.8, 50.3, 40.1, 39.0, 26.6, 24.5, 24.4, 23.9. HRMS (ESI) *m/z*: [M + H]<sup>+</sup> calcd. for C<sub>23</sub>H<sub>28</sub>N<sub>3</sub>O<sub>3</sub>S<sup>+</sup> 426.1846; found 426.1846.

## 2-Acetyl-4-cyano-3-morpholino-*N*-phenyl-1-thiaspiro[4.6]undec-3-ene-2-carboxamide (**6lh**)

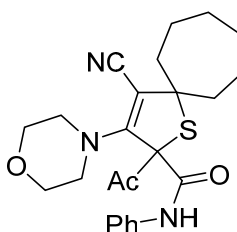

Product **6lh** was obtained according to the general procedure from 2-cycloheptylidene-3-morpholino-3-thioxopropanenitrile (**1l**) (200 mg, 1.0 equiv, 0.76 mmol), 2-diazo-3-oxo-*N*-phenylbutanamide (**2h**) (307 mg, 2.0 equiv, 1.51 mmol), [Cu(MeCN)<sub>4</sub>]OTf (57 mg), chloroform (6.0 mL), 90 °C, reaction time is 24 h. The purification of the crude product by column chromatography on SiO<sub>2</sub> (DCM/EtOAc, gradient 25:0 to 23:2) afforded **6lh** as a yellow oily mass (281 mg). The latter was triturated with hexane:diethyl ether (1:1) and the formed precipitate was

centrifugated afforded **6lh** as a colorless powder (56%, 187 mg), mp 168–170 °C. The second regioisomer was formed in a trace amount. <sup>1</sup>H NMR (400 MHz, CDCl<sub>3</sub>): δ 9.30 (s, 1H, NH), 7.53 (d, *J* = 8.6 Hz, 2H), 7.36 (t, *J* = 7.9 Hz, 2H), 7.17 (t, *J* = 7.4 Hz, 1H), 3.69 – 3.60 (m, 4H), 3.56 – 3.50 (m, 2H), 3.35 – 3.29 (m, 2H), 2.48 (s, 3H), 2.26 – 2.18 (m, 3H), 2.05 – 2.00 (m, 1H), 1.83 – 1.77 (m, 2H), 1.61 – 1.48 (m, 6H). <sup>13</sup>C{<sup>1</sup>H} NMR (100 MHz, CDCl<sub>3</sub>): 201.6, 165.8, 155.4, 137.2, 129.3, 125.3, 120.2, 117.9, 95.3, 71.5, 66.5, 66.0, 50.4, 44.3, 42.6, 27.7, 27.7, 26.6, 24.5, 24.0. HRMS (ESI) *m/z*: [M + H]<sup>+</sup> calcd. for C<sub>24</sub>H<sub>29</sub>N<sub>3</sub>O<sub>3</sub>S<sup>+</sup> 440.2002; found 440.1999.

## 2-Acetyl-4-cyano-3-morpholino-*N*-phenyl-1-thiaspiro[4.7]dodec-3-ene-2-carboxamide (**6oh**)

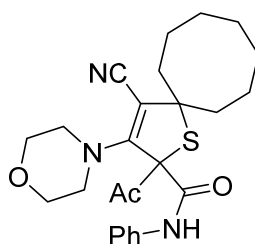

Product **6oh** was obtained according to the general procedure from 2-cyclooctylidene-3-morpholino-3-thioxopropanenitrile (**1o**) (200 mg, 1.0 equiv, 0.72 mmol), 2-diazo-3-oxo-*N*-phenylbutanamide (**2h**) (292 mg, 2.0 equiv, 1.44 mmol), [Cu(MeCN)<sub>4</sub>]OTf (54 mg), chloroform (6.0 mL), 90 °C, reaction time is 24 h. The purification of the crude product by column chromatography on SiO<sub>2</sub> (DCM/EtOAc, gradient 25:0 to 23.5:1.5) afforded **6oh** as a yellow oily mass (276 mg). The latter was triturated with hexane:diethyl ether (1:1) and the formed precipitate was centrifugated afforded **6oh** as a colorless powder (67%, 218 mg), mp 241–243 °C. The second regioisomer was formed in a trace amount. <sup>1</sup>H NMR (400 MHz, CDCl<sub>3</sub>): δ 9.30 (s, 1H, NH), 7.53 (d, *J* = 7.9 Hz, 2H), 7.36 (t, *J* = 7.7 Hz, 2H), 7.17 (t, *J* = 7.2 Hz, 1H), 3.70 – 3.60 (m, 4H), 3.56 – 3.52 (m, 2H), 3.36 – 3.30 (m, 2H), 2.43 (s, 3H), 2.41 – 2.31 (m, 2H), 2.26 – 2.20 (m, 1H), 2.08 – 2.02 (m, 1H), 1.90 – 1.85 (m, 2H), 1.65 – 1.51 (m, 9H). <sup>13</sup>C{<sup>1</sup>H} NMR (100 MHz, CDCl<sub>3</sub>): 201.5, 165.9, 156.0, 137.2, 129.3, 125.3, 120.2, 118.2, 94.6, 71.4, 66.6, 65.8, 50.5, 40.8, 38.8, 27.9, 27.8, 26.6, 24.5, 24.1, 24.0. HRMS (ESI) *m/z*: [M + H]<sup>+</sup> calcd. for C<sub>25</sub>H<sub>32</sub>N<sub>3</sub>O<sub>3</sub>S<sup>+</sup> 454.2159; found 454.2159.

## Asymmetric Synthesis of Dihydrithiophenes 5

A 20 mL Schlenk tube was charge with Rh<sub>2</sub>(*S*-NTTL)<sub>4</sub> (0.5 mol %), thioamide **1** (1.0 equiv) and dry chloroform (1 mL). A solution of diazo compound **2p** or **2v** (1.5 equiv) in dry chloroform (1 mL) was added slowly to the tube via syringe at 0 °C. Then the reaction solution was allowed to warm to room temperature and stirred for 40 min (for **5hp**) or stirred 30 min at 0 °C and 20 min at room temperature (for **5ip**, **jp'**, **lp'**, **op'**, **ov**), and then the solution was directly subjected to SiO<sub>2</sub>.

**(S)-3',3',7-Trimethyl-5'-morpholino-2-oxo-3'H-spiro[indoline-3,2'-thiophene]-4'-carbonitrile (5hp)**

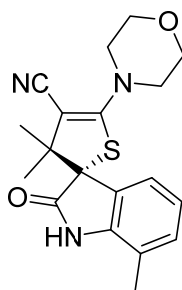

Product **5hp** was obtained according to the general procedure from thioamide **1h** (30 mg, 1.0 equiv, 0.14 mmol), diazo compound **2p** (37 mg, 1.5 equiv, 0.21 mmol), Rh<sub>2</sub>(S-NTTL)<sub>4</sub> (1.3 mg), chloroform (2 mL). The purification of the crude product by column chromatography on SiO<sub>2</sub> (DCM/EtOAc, gradient 25:0 to 20:5) afforded **5hp** as a colorless powder (96%, 49 mg, 1.4:98.6 e.r.), mp 131–133 °C,  $[\alpha]_D^{20} = +59$  (C = 0.89, CHCl<sub>3</sub>). The enantiomeric excess was determined by HPLC analysis on a Chiralpak AD column: 5:1 *n*-hexane/*i*-PrOH, flow rate 1 mL/min,  $\lambda = 220, 230$  nm: TR Minor = 8.28 min, TR Major = 9.67 min. <sup>1</sup>H NMR (400 MHz, DMSO-*d*<sub>6</sub>):  $\delta$  10.73 (s, 1H, NH), 7.27 (d, *J* = 7.0 Hz, 1H), 7.11 (d, *J* = 7.0 Hz, 1H), 6.93 (t, *J* = 7.4 Hz, 1H), 3.67 (br. s, 4H), 3.53 (br. s, 4H), 2.20 (s, 3H), 1.26 (s, 3H), 1.08 (s, 3H). <sup>13</sup>C {<sup>1</sup>H} NMR (100 MHz, DMSO-*d*<sub>6</sub>):  $\delta$  175.9, 161.4, 140.9, 131.3, 123.8, 123.5, 121.7, 119.6, 118.7, 78.2, 65.6, 63.6, 51.6, 50.4, 25.1, 22.1, 16.4. HRMS (ESI) *m/z*: [M + H]<sup>+</sup> calcd. for C<sub>19</sub>H<sub>22</sub>N<sub>3</sub>O<sub>2</sub>S<sup>+</sup> 356.1427; found 356.1433.

**(S)-7''-Methyl-5'-morpholino-2''-oxodispiro[cyclopentane-1,3'-thiophene-2',3''-indoline]-4'-carbonitrile (5ip)**

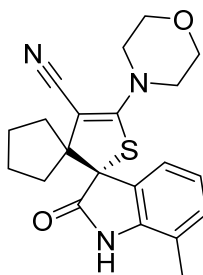

Product **5ip** was obtained according to the general procedure from thioamide **1i** (30 mg, 1.0 equiv, 0.13 mmol), diazo compound **2p** (33 mg, 1.5 equiv, 0.19 mmol), Rh<sub>2</sub>(S-NTTL)<sub>4</sub> (1.4 mg), chloroform (2 mL). The purification of the crude product by column chromatography on SiO<sub>2</sub> (DCM/EtOAc, gradient 20:5 to 20:20) afforded **5ip** as a colorless powder (83%, 40 mg, 3.9:96.1 e.r.), mp 102–104 °C,  $[\alpha]_D^{20} = -7.7$  (C = 0.77, CHCl<sub>3</sub>). The enantiomeric excess was determined by HPLC analysis on a Chiralpak AD column: 5:1 *n*-hexane/*i*-PrOH, flow rate 1 mL/min,  $\lambda = 220, 230$  nm: TR Minor = 11.98 min, TR Major = 12.70 min. <sup>1</sup>H NMR (400 MHz, CDCl<sub>3</sub>-*d*):  $\delta$  9.51 (s, 1H, NH), 7.33 (d, *J* = 7.5 Hz, 1H), 7.11 (d, *J* = 7.6 Hz, 1H), 6.97 (t, *J* = 7.6 Hz, 1H), 3.78 – 3.76

(m, 4H), 3.69 – 3.59 (m, 4H), 2.31 (s, 3H), 2.09 – 1.84 (m, 4H), 1.79 – 1.70 (m, 2H), 1.45 – 1.32 (m, 2H).  $^{13}\text{C}\{1\text{H}\}$  NMR (100 MHz, DMSO- $d_6$ ):  $\delta$  177.6, 162.3, 139.8, 131.5, 125.7, 123.6, 122.9, 120.1, 119.3, 80.8, 66.5, 64.2, 63.9, 51.2, 36.4, 33.6, 24.8, 24.7, 16.5. HRMS (ESI)  $m/z$ :  $[\text{M} + \text{H}]^+$  calcd. for  $\text{C}_{21}\text{H}_{24}\text{N}_3\text{O}_2\text{S}^+$  382.1584; found 382.1580.

**(S)-7''-Methyl-5'-morpholino-2''-oxodispiro[cyclohexane-1,3'-thiophene-2',3''-indoline]-4'-carbonitrile (5jp')**

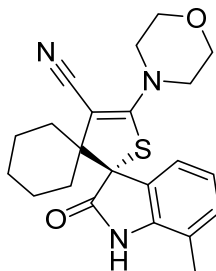

Product **5jp'** was obtained according to the general procedure from thioamide **1i** (30 mg, 1.0 equiv, 0.12 mmol), diazo compound **2p** (31 mg, 1.5 equiv, 0.18 mmol),  $\text{Rh}_2(\text{S-NTTL})_4$  (1.3 mg), chloroform (2 mL). The purification of the crude product by column chromatography on  $\text{SiO}_2$  (DCM/EtOAc, gradient 20:5 to 20:20) afforded **5jp'** as a colorless powder (72%, 34 mg, 4.1:95.9 e.r.), mp 218–219 °C,  $[\alpha]_D^{20} = +12.0$  ( $C = 1.07$ ,  $\text{CHCl}_3$ ). The enantiomeric excess was determined by HPLC analysis on a Chiralpak AD column: 5:1 *n*-hexane/*i*-PrOH, flow rate 1 mL/min,  $\lambda = 220$ , 230 nm: TR Minor = 12.33 min, TR Major = 15.82 min. The spectral data are consistent with those reported previously for the racemate **5jp**.

**(S)-7''-methyl-5'-morpholino-2''-oxodispiro[cycloheptane-1,3'-thiophene-2',3''-indoline]-4'-carbonitrile (5lp')**

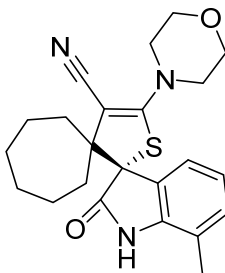

Product **5lp'** was obtained according to the general procedure from thioamide **1i** (30 mg, 1.0 equiv, 0.11 mmol), diazo compound **2p** (29 mg, 1.5 equiv, 0.17 mmol),  $\text{Rh}_2(\text{S-NTTL})_4$  (1.2 mg), chloroform (2 mL). The purification of the crude product by column chromatography on  $\text{SiO}_2$  (DCM/EtOAc, gradient 20:5 to 20:20) afforded **5lp'** as a colorless powder (83%, 38 mg, 4.3:95.7 e.r.), mp 213–215 °C,  $[\alpha]_D^{20} = +23.0$  ( $C = 1.27$ ,  $\text{CHCl}_3$ ). The enantiomeric excess was determined by HPLC analysis on a Chiralpak AD column: 5:1 *n*-hexane/*i*-PrOH, flow rate 1 mL/min,  $\lambda = 220$ , 230 nm: TR Minor = 12.87 min, TR Major = 13.70 min. The spectral data are consistent with those reported previously for the racemate **5lp**.

**(S)-7''-Methyl-5'-morpholino-2''-oxodispiro[cyclooctane-1,3'-thiophene-2',3''-indoline]-4'-carbonitrile (5op')**

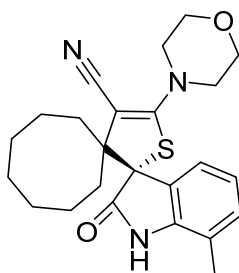

Product **5op'** was obtained according to the general procedure from thioamide **1o** (30 mg, 1.0 equiv, 0.11 mmol), diazo compound **2p** (28 mg, 1.5 equiv, 0.16 mmol),  $\text{Rh}_2(\text{S-NTTL})_4$  (1.1 mg), chloroform (2 mL). The purification of the crude product by column chromatography on  $\text{SiO}_2$  (DCM/EtOAc, gradient 20:5 to 20:20) afforded **5op'** as a colorless powder (91%, 42 mg, 7.0:93.0 e.r.), mp 245–247 °C,  $[\alpha]_D^{20} = +10.3$  (C = 1.17,  $\text{CHCl}_3$ ). The enantiomeric excess was determined by HPLC analysis on a Chiralpak AD column: 5:1 *n*-hexane/*i*-PrOH, flow rate 1 mL/min,  $\lambda = 220, 230$  nm: TR Minor = 28.18 min, TR Major = 12.95 min. The spectral data are consistent with those reported previously for the racemate **5op**.

**(S)-5''-Methyl-5'-morpholino-2''-oxodispiro[cyclooctane-1,3'-thiophene-2',3''-indoline]-4'-carbonitrile (5ov)**

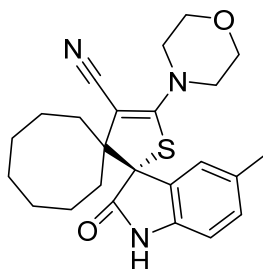

Product **5ov** was obtained according to the general procedure from thioamide **1o** (30 mg, 1.0 equiv, 0.11 mmol), diazo compound **2v** (28 mg, 1.5 equiv, 0.16 mmol),  $\text{Rh}_2(\text{S-NTTL})_4$  (1.1 mg), chloroform (2 mL). The purification of the crude product by column chromatography on  $\text{SiO}_2$  (DCM/EtOAc, gradient 20:5 to 20:20) afforded **5ov** as a pale-red powder (87%, 40 mg, 19:81 e.r.), mp 144–146 °C,  $[\alpha]_D^{20} = -3.43$  (C = 0.67,  $\text{CHCl}_3$ ). The enantiomeric excess was determined by HPLC analysis on a Chiralpak AD column: 5:1 *n*-hexane/*i*-PrOH, flow rate 1 mL/min,  $\lambda = 220, 230$  nm: TR Minor = 23.70 min, TR Major = 11.45 min.  $^1\text{H}$  NMR (400 MHz,  $\text{DMSO-}d_6$ ):  $\delta$  10.62 (s, 1H, NH), 7.30 (s, 1H), 7.09 (d,  $J = 7.8$  Hz, 1H), 6.75 (d,  $J = 7.9$  Hz, 1H), 3.68 – 3.65 (m, 4H), 3.60 – 3.49 (m, 4H), 2.35 – 2.28 (m, 4H), 2.14 – 1.93 (m, 3H), 1.5 (br. s, 5H), 1.35 – 1.27 (m, 4H), 0.85 (br. s, 1H).  $^{13}\text{C}$  {1H} NMR (100 MHz,  $\text{DMSO-}d_6$ ):  $\delta$  175.6, 162.9, 139.3, 130.5, 130.3, 119.8, 109.8, 77.8, 65.7, 64.6, 57.3, 50.7, 29.5, 29.4, 28.9, 27.5, 24.8, 22.2, 21.4, 20.8. HRMS (ESI)  $m/z$ :  $[\text{M} + \text{H}]^+$  calcd. for  $\text{C}_{24}\text{H}_{30}\text{N}_3\text{O}_2\text{S}^+$  424.2053; found 424.2057.

## Gram-scale synthesis of dihydrithiophenes **5jh**

### 1-Acetyl-4-cyano-3-morpholino-*N*-phenyl-2-thiaspiro[4.5]dec-3-ene-1-carboxamide (**5jh**)

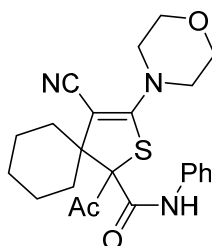

To an oven-dried double neck round bottom flask (100 mL), rhodium (II) pivalate dimer (0.5 mol %, 24.4 mg), thioamide **1j** (1000 mg, 1.0 equiv, 3.99 mmol) and dry chloroform (10 mL) were added under an argon atmosphere. After stirring for 15 min at room temperature, a solution of diazoacetamide **2h** (811.5 mg, 1.0 equiv, 3.99 mmol) in dry chloroform (20 mL) was added via syringe to the flask. Then, the reaction mixture was allowed to stir at room temperature for 2 h. Two hours later a new portion of a solution of diazoacetamide **2h** (811.5 mg, 1.0 equiv, 3.99 mmol) in dry chloroform (20 mL) was added via syringe to the flask. Upon completion (14 h), chloroform was removed under reduced pressure and the product was isolated using column chromatography on SiO<sub>2</sub> (Eluent mixture PE/EtOAc, gradient 25:0 to 25:25) afforded **5jh** as a colorless powder (74%, 1258 mg), mp 198–200 °C and **6jh** as a colorless powder (3%, 51 mg), mp 195–196 °C.

## X-Ray crystallographic data

A single crystal of **3aa** was obtained by crystallization via evaporation at room temperature from its ethyl acetate solution. The deposition number for **3aa** at the Cambridge Crystallographic Data Centre is CCDC 2288490.

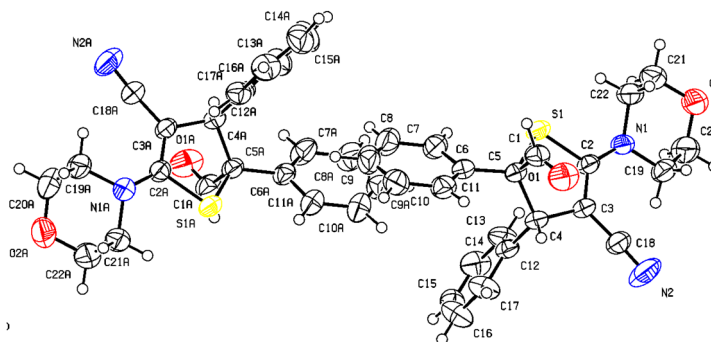

**Figure S4.** X-Ray crystallographic data of **3aa**. Thermal ellipsoids are shown at the 50% level.

**Crystal Data for 3aa.** C<sub>22</sub>H<sub>20</sub>N<sub>2</sub>O<sub>2</sub>S (M = 376.46 g/mol): triclinic, space group P-1 (no. 2), a = 11.9036(6) Å, b = 12.3656(5) Å, c = 13.5444(6) Å,  $\alpha$  = 82.460(4)°,  $\beta$  = 80.987(4)°,  $\gamma$  = 79.478(4)°, V = 1925.11(16) Å<sup>3</sup>, Z = 4, T = 295(2) K,  $\mu$ (Mo K $\alpha$ ) = 0.187 mm<sup>-1</sup>, D<sub>calc</sub> = 1.299 g/cm<sup>3</sup>, 21912 reflections measured (7.214° ≤ 2 $\theta$  ≤ 60.952°), 10398 unique (R<sub>int</sub> = 0.0410, R<sub>sigma</sub> = 0.0692) which were used in all calculations. The final R<sub>1</sub> was 0.0606 (I > 2 $\sigma$ (I)) and wR<sub>2</sub> was 0.1979. GooF 1.007. Largest diff. peak/hole 0.36/-0.40.

A single crystal of **3ad** was obtained by crystallization via evaporation at room temperature from its ethyl acetate solution. The deposition number for **3ad** at the Cambridge Crystallographic Data Centre is CCDC 2288496.

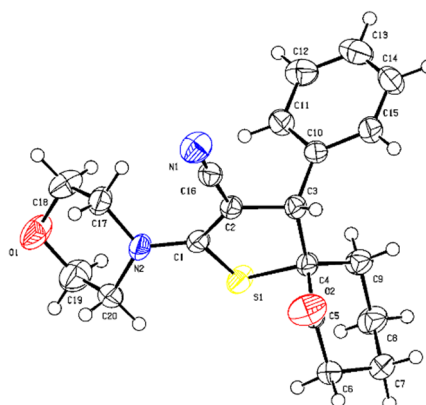

**Figure S5.** X-Ray crystallographic data of **3ad**. Thermal ellipsoids are shown at the 50% level.



**Crystal Data for 3ad.** C<sub>20</sub>H<sub>22</sub>N<sub>2</sub>O<sub>2</sub>S (M = 354.45 g/mol): orthorhombic, space group Pbc<sub>a</sub> (no. 61), a = 9.1006(15) Å, b = 15.187(3) Å, c = 25.844(6) Å, V = 3572.0(12) Å<sup>3</sup>, Z = 8, T = 295.15 K, μ(Mo Kα) = 0.197 mm<sup>-1</sup>, D<sub>calc</sub> = 1.318 g/cm<sup>3</sup>, 11055 reflections measured (5.364° ≤ 2θ ≤ 58.934°), 4247 unique (R<sub>int</sub> = 0.0351, R<sub>sigma</sub> = 0.0456) which were used in all calculations. The final R<sub>1</sub> was 0.0485 (I > 2σ(I)) and wR<sub>2</sub> was 0.1245. GooF 1.038. Largest diff. peak/hole 0.30/-0.29.

A single crystal of **3ae** was obtained by crystallization via evaporation at room temperature from its ethyl acetate solution. The deposition number for **3ae** at the Cambridge Crystallographic Data Centre is CCDC 2288498.

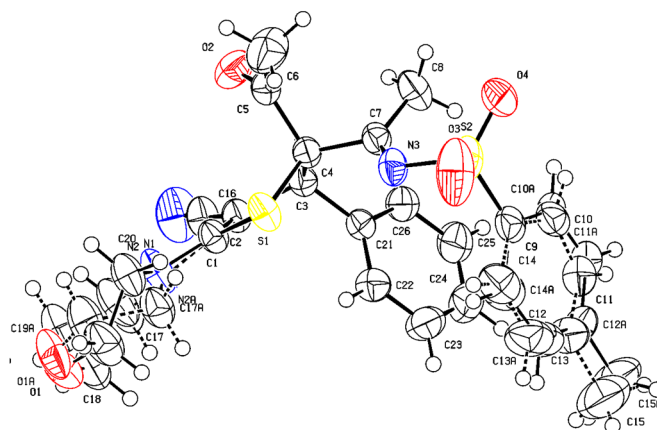

**Figure S6.** X-Ray crystallographic data of **3ae**. Thermal ellipsoids are shown at the 50% level.

**Crystal Data for 3ae.** C<sub>26</sub>H<sub>27</sub>N<sub>3</sub>O<sub>4</sub>S<sub>2</sub> (M = 509.62 g/mol): orthorhombic, space group Pbc<sub>a</sub> (no. 61), a = 18.539(3) Å, b = 11.4393(16) Å, c = 24.448(4) Å, V = 5184.6(14) Å<sup>3</sup>, Z = 8, T = 295.15 K, μ(Mo Kα) = 0.242 mm<sup>-1</sup>, D<sub>calc</sub> = 1.306 g/cm<sup>3</sup>, 18665 reflections measured (4.504° ≤ 2θ ≤ 58.838°), 6274 unique (R<sub>int</sub> = 0.0344, R<sub>sigma</sub> = 0.0433) which were used in all calculations. The final R<sub>1</sub> was 0.0579 (I > 2σ(I)) and wR<sub>2</sub> was 0.1450. GooF 1.034. Largest diff. peak/hole 0.28/-0.51.

A single crystal of **3ta** was obtained by crystallization via evaporation at room temperature from its ethyl acetate solution. The deposition number for **3ta** at the Cambridge Crystallographic Data Centre is CCDC 2288497.

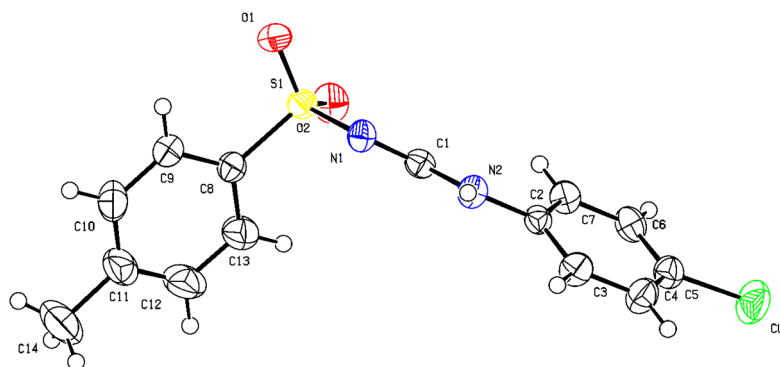

**Figure S7.** X-Ray crystallographic data of **3ta**. Thermal ellipsoids are shown at the 50% level.

**Crystal Data for 3ta.** C<sub>14</sub>H<sub>13</sub>ClN<sub>2</sub>O<sub>2</sub>S (M = 308.77 g/mol): monoclinic, space group P2<sub>1</sub>/c (no. 14), a = 13.453(3) Å, b = 9.8748(18) Å, c = 11.570(3) Å, β = 107.97(3)°, V = 1462.0(6) Å<sup>3</sup>, Z = 4, T = 295(2) K, μ(Mo Kα) = 0.406 mm<sup>-1</sup>, D<sub>calc</sub> = 1.403 g/cm<sup>3</sup>, 7161 reflections measured (5.21° ≤ 2θ ≤ 58.988°), 3480 unique (R<sub>int</sub> = 0.0368, R<sub>sigma</sub> = 0.0491) which were used in all calculations. The final R<sub>1</sub> was 0.0508 (I > 2σ(I)) and wR<sub>2</sub> was 0.1446. GooF 1.052. Largest diff. peak/hole 0.46/-0.49.

A single crystal of **4ah** was obtained by crystallization via evaporation at room temperature from its mixture of methanol and acetonitrile solution. The deposition number for **4ah** at the Cambridge Crystallographic Data Centre is CCDC 2288491.

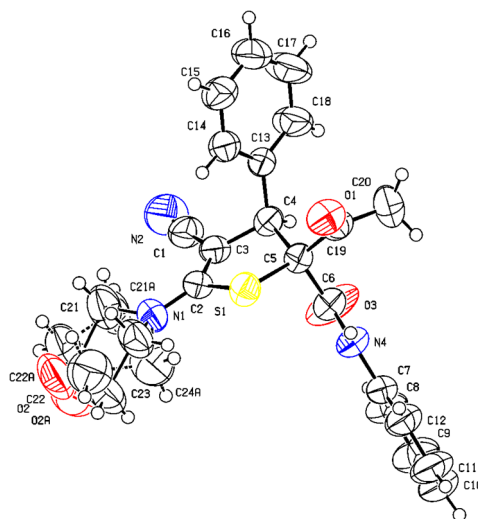

**Figure S8.** X-Ray crystallographic data of **4ah**. Thermal ellipsoids are shown at the 50% level.

**Crystal Data for 4ah.** C<sub>24</sub>H<sub>23</sub>N<sub>3</sub>O<sub>3</sub>S (M = 433.51 g/mol): orthorhombic, space group Pbca (no. 61), a = 13.4556(12) Å, b = 16.0823(15) Å, c = 21.045(2) Å, V = 4554.0(8) Å<sup>3</sup>, Z = 8, T = 295(2) K, μ(MoKα) = 0.172 mm<sup>-1</sup>, D<sub>calc</sub> = 1.265 g/cm<sup>3</sup>, 14386 reflections measured (7.624° ≤ 2θ ≤ 52.744°), 4622 unique (R<sub>int</sub> = 0.0648, R<sub>sigma</sub> = 0.0885) which were used in all calculations. The

final  $R_1$  was 0.0672 ( $I > 2\sigma(I)$ ) and  $wR_2$  was 0.2266. GooF 1.015. Largest diff. peak/hole 0.21/-0.24.

A single crystal of **4ai** was obtained by crystallization via evaporation at room temperature from its mixture of methanol, ethyl acetate and acetonitrile solution. The deposition number for **4ai** at the Cambridge Crystallographic Data Centre is CCDC 2288493.

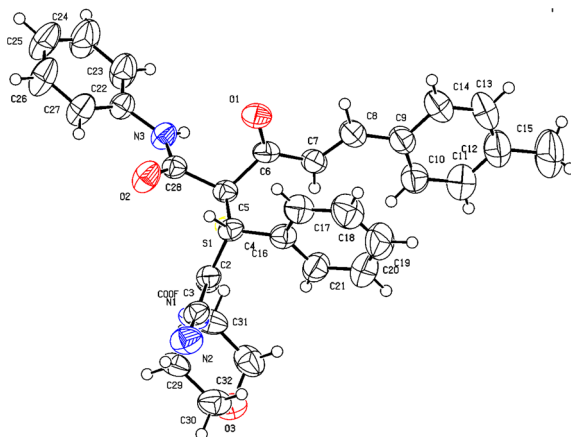

**Figure S9.** X-Ray crystallographic data of **4ai**. Thermal ellipsoids are shown at the 50% level.

**Crystal Data for 4ai.**  $C_{32}H_{29}N_3O_3S$  ( $M = 535.64$  g/mol): monoclinic, space group  $P2_1/n$  (no. 14),  $a = 13.1630(12)$  Å,  $b = 11.7627(8)$  Å,  $c = 18.6294(17)$  Å,  $\beta = 99.090(8)^\circ$ ,  $V = 2848.2(4)$  Å<sup>3</sup>,  $Z = 4$ ,  $T = 295(2)$  K,  $\mu(\text{MoK}\alpha) = 0.151$  mm<sup>-1</sup>,  $D_{\text{calc}} = 1.249$  g/cm<sup>3</sup>, 22624 reflections measured ( $7.082^\circ \leq 2\theta \leq 60.996^\circ$ ), 7713 unique ( $R_{\text{int}} = 0.0677$ ,  $R_{\text{sigma}} = 0.0971$ ) which were used in all calculations. The final  $R_1$  was 0.0670 ( $I > 2\sigma(I)$ ) and  $wR_2$  was 0.2342. GooF 1.012. Largest diff. peak/hole 0.28/-0.42.

A single crystal of **4ao** was obtained by crystallization via evaporation at room temperature from its methanol solution. The deposition number for **4ao** at the Cambridge Crystallographic Data Centre is CCDC 2288492.

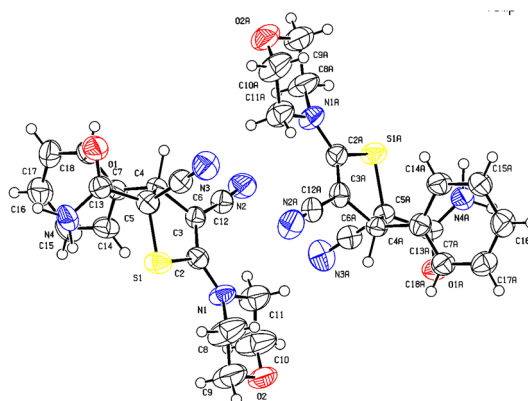

**Figure S10.** X-Ray crystallographic data of **4ao**. Thermal ellipsoids are shown at the 50% level.

**Crystal Data for 4ao.** C<sub>17</sub>H<sub>16</sub>N<sub>4</sub>O<sub>2</sub>S (M = 340.40 g/mol): orthorhombic, space group Pna21 (no. 33), a = 20.677(2) Å, b = 10.7808(7) Å, c = 15.1131(17) Å, V = 3369.0(6) Å<sup>3</sup>, Z = 8, T = 295(2) K,  $\mu(\text{MoK}\alpha) = 0.209 \text{ mm}^{-1}$ ,  $D_{\text{calc}} = 1.342 \text{ g/cm}^3$ , 11968 reflections measured ( $7.518^\circ \leq 2\theta \leq 60.962^\circ$ ), 6726 unique ( $R_{\text{int}} = 0.0686$ ,  $R_{\text{sigma}} = 0.1152$ ) which were used in all calculations. The final  $R_1$  was 0.0660 ( $I > 2\sigma(I)$ ) and  $wR_2$  was 0.1816. GooF 1.002. Largest diff. peak/hole 0.29/-0.34.

A single crystal of **5in** was obtained by crystallization via evaporation at room temperature from its ethyl acetate solution. The deposition number for **5in** at the Cambridge Crystallographic Data Centre is CCDC 2288495.

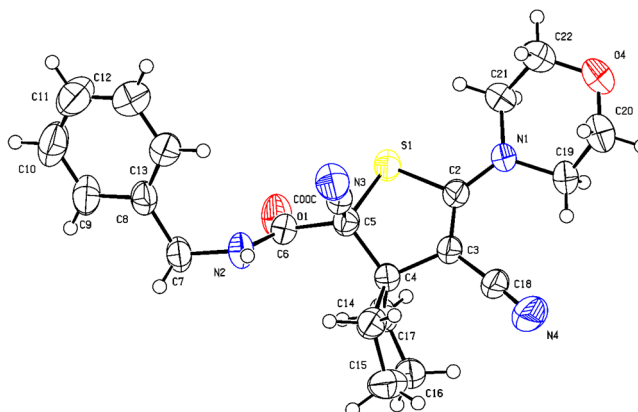

**Figure S11.** X-Ray crystallographic data of **5in**. Thermal ellipsoids are shown at the 50% level.

**Crystal Data for 5in.** C<sub>22</sub>H<sub>24</sub>N<sub>4</sub>O<sub>2</sub>S (M = 408.51 g/mol): monoclinic, space group C2/c (no. 15), a = 19.8227(18) Å, b = 8.1430(7) Å, c = 26.372(3) Å,  $\beta = 102.977(10)^\circ$ , V = 4148.2(7) Å<sup>3</sup>, Z = 8, T = 295(2) K,  $\mu(\text{MoK}\alpha) = 0.182 \text{ mm}^{-1}$ ,  $D_{\text{calc}} = 1.308 \text{ g/cm}^3$ , 11495 reflections measured ( $7.526^\circ \leq 2\theta \leq 56.564^\circ$ ), 4953 unique ( $R_{\text{int}} = 0.0634$ ,  $R_{\text{sigma}} = 0.0960$ ) which were used in all calculations. The final  $R_1$  was 0.0648 ( $I > 2\sigma(I)$ ) and  $wR_2$  was 0.1999. GooF 1.016. Largest diff. peak/hole 0.30/-0.30.

A single crystal of **5hp** was obtained by crystallization via evaporation at room temperature from its mixture of ethyl acetate and dichloromethane solution. The deposition number for **5hp** at the Cambridge Crystallographic Data Centre is CCDC 2288489.

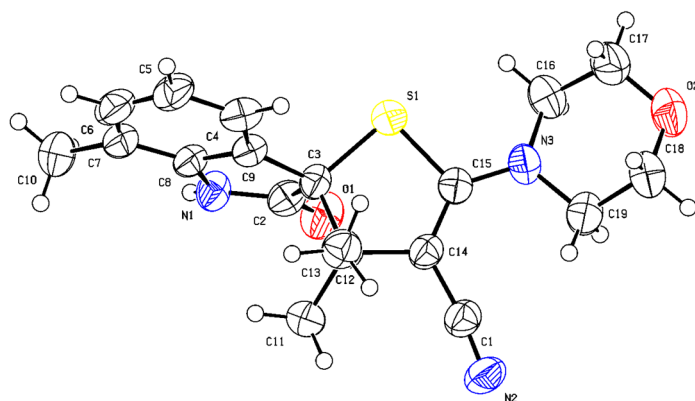

**Figure S12.** X-Ray crystallographic data of **5hp**. Thermal ellipsoids are shown at the 50% level.

**Crystal Data for 5hp.**  $C_{19}H_{21}N_3O_2S$  ( $M = 355.45$  g/mol): monoclinic, space group  $P2_1/n$  (no. 14),  $a = 14.247(3)$  Å,  $b = 9.0994(10)$  Å,  $c = 15.279(4)$  Å,  $\beta = 117.13(3)^\circ$ ,  $V = 1762.8(8)$  Å<sup>3</sup>,  $Z = 4$ ,  $T = 295(2)$  K,  $\mu(\text{MoK}\alpha) = 0.201$  mm<sup>-1</sup>,  $D_{\text{calc}} = 1.339$  g/cm<sup>3</sup>, 10192 reflections measured ( $4.700^\circ \leq 2\theta \leq 62.280^\circ$ ), 5831 unique ( $R_{\text{int}} = 0.0271$ ,  $R_{\text{sigma}} = 0.0497$ ) which were used in all calculations. The final  $R_1$  was 0.0770 ( $I > 2\sigma(I)$ ) and  $wR_2$  was 0.2509. GooF 1.055. Largest diff. peak/hole 0.22/-0.25.

A single crystal of **6jh** was obtained by crystallization via evaporation at room temperature from its ethyl acetate solution. The deposition number for **6jh** at the Cambridge Crystallographic Data Centre is CCDC 2306789.

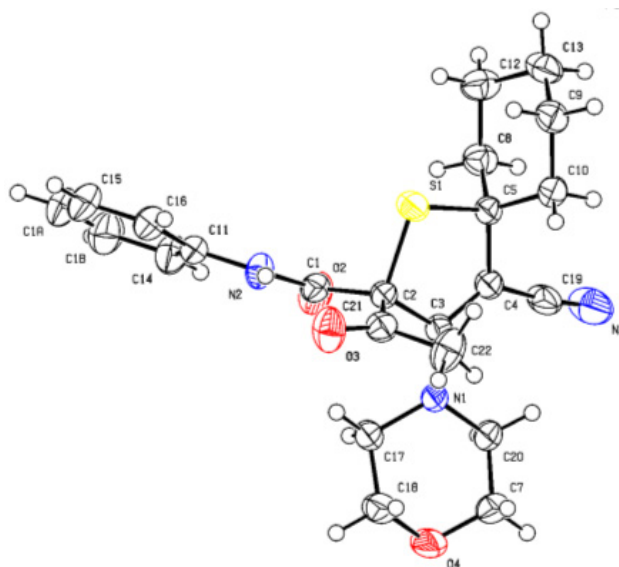

**Figure S13.** X-Ray crystallographic data of **6jh**. Thermal ellipsoids are shown at the 50% level.

**Crystal Data for 6jh.**  $C_{23}H_{27}N_3O_3S$  ( $M = 425.54$  g/mol): monoclinic, space group  $P2_1/c$  (no. 14),  $a = 18.9394(6)$  Å,  $b = 9.8877(3)$  Å,  $c = 11.9483(3)$  Å,  $\alpha = 90^\circ$ ,  $\beta = 107.354(3)^\circ$ ,  $\gamma = 90^\circ$ ,  $V = 2135.67(11)$  Å<sup>3</sup>,  $Z = 4$ ,  $T = 295(2)$  K,  $\mu(\text{MoK}\alpha) = 0.182$  mm<sup>-1</sup>,  $D_{\text{calc}} = 1.324$  g/cm<sup>3</sup>, 9437 reflections

measured ( $7.378^\circ \leq 2\Theta \leq 62^\circ$ ), 4252 unique ( $R_{\text{int}} = 0.0407$ ,  $R_{\text{sigma}} = 0.0545$ ) which were used in all calculations. The final  $R_1$  was 0.0510 ( $I > 2\sigma(I)$ ) and  $wR_2$  was 0.1397. GooF 1.011. Largest diff. peak/hole 0.29/-0.55.

## References

1. O. V. Dolomanov, L. J. Bourhis, R. J. Gildea, J. A. K. Howard and H. Puschmann, OLEX2: A complete structure solution, refinement and analysis program, *J. Appl. Cryst.*, 2009, **42**, 339–341.
2. G. M. Sheldrick, Crystal structure refinement with SHELXL, *Acta Cryst. C*. 2015, **C71**, 3–8.
3. C. Heyde, I. Zug and H. Hartmann, A Simple route to *N,N*-dialkyl derivatives of 2-amino-5-thiophenecarboxylates, *Eur. J. Org. Chem.*, 2000, **2000**, 3273–3278.
4. M. F. Kosterina, Y. Y. Morzherin, A. V. Tkachev, T. V. Rybalova, Yu. V. Gatilov and V. A. Bakulev, Reactions of *N,N*-(dialkyl)arylthioacetamides with dialkyl acetylenedicarboxylates, *Russ. Chem. Bull.*, 2002, **51**, 653–658.
5. V. O. Filimonov, V. T. Abaev, T. V. Beryozkina, K. A. Galata, P. A. Slepukhin, M. A. Kostenko and V. S. Berseneva, Tandem Knoevenagel condensation and intramolecular cycloaddition reactions of 2-azidobenzaldehydes with 2-cyanoacetamides in the synthesis of 4-thiocarbamoyltetrazolo-[1,5-*a*]quinolines, *Chem. Heterocycl. Compd.*, 2016, **52**, 721–726.
6. E. F. Dankova, V. A. Bakulev, M. Yu. Kolobov, V. I. Shishkina, Ya. B. Yasman and A. T. Lebedev, Synthesis and properties of 5-amino-1,2,3-thiadiazole-4-carbothioamides, *Chem. Heterocycl. Compd.*, 1988, **9**, 1269–1273.
7. F. Suzenet, D. Sirbu, G. Guillaumet and P. Bonnet, Preparation of new polyazo heterocyclic compounds and their uses as fluorescent chromophores, FR3039153, 2017.
8. L. A. T. Cleghorn, P. C. Ray, J. Odingo, A. Kumar, H. Wescott, A. Korkegian, T. Masquelin, A. Lopez Moure, C. Wilson, S. Davis, M. Huggett, P. Turner, A. Smith, O. Epemolu, F. Zuccotto, J. Riley, P. Scullion, Y. Shishikura, L. Ferguson, J. Rullas, L. Guijarro, K. D. Read, S. R. Green, P. Hipskind, T. Parish, and P. G. Wyatt, Identification of morpholino thiophenes as novel mycobacterium tuberculosis inhibitors, Targeting QcrB, *J. Med. Chem.*, 2018, **15**, 6592–6608.
9. K. L. Lugovik, A. K. Eltyshev, E. Benassi and N. P. Belskaya, Synthesis of 5-acyl-2-amino-3-cyanothiophenes: chemistry and fluorescent properties, *Chem. Asian J.*, 2017, **12**, 2410–2425.
10. N. P. Belskaia, T. G. Deryabina, A. V. Koksharov, M. I. Kodess, W. Dehaen, A. T. Lebedev and V. A. Bakulev, A novel approach to fused 1,2,4-triazines by intramolecular cyclization of 1,2-diaza-1,3-butadienes bearing allyl(propargyl)sulfanyl and cyclic tert-amino groups, *Tetrahedron Lett.*, 2007, **48**, 9128–9131.
11. J. Raushel and V. V. Fokin, Efficient Synthesis of 1-Sulfonyl-1,2,3-triazoles, *Org. Lett.* 2010, **12**, 4952–4955.

12. V. G. Ilkin, T. V. Beryozkina, D. Willocx, P. S. Silaichev, S. P. Veetil, W. Dehaen and V. A. Bakulev, Rhodium-catalyzed transannulation of 4,5-fused 1-sulfonyl-1,2,3-triazoles with nitriles. The selective formation of 1-sulfonyl-4,5-fused imidazoles versus secondary C-H bond migration, *J. Org. Chem.* 2022, **87**, 12274–12286.
13. S. Rajasekar and P. Anbarasan, A general proline-catalyzed synthesis of 4,5-disubstituted *N*-sulfonyl-1,2,3-triazoles from 1,3-dicarbonyl compounds and sulfonyl azide, *Chem. Asian J.*, 2019, **14**, 4563–4567.
14. V. G. Ilkin, V. O. Filimonov, E. A. Seliverstova, M. S. Novikov, T. V. Beryozkina, A. A. Gagarin, N. P. Belskaya, N. J. Muthipeedika, V. A. Bakulev and W. Dehaen, Thioisomünchnones versus acrylamides via copper-catalyzed reaction of thioamides with diazocarbonyl compounds, *J. Org. Chem.*, 2022, **87**, 12196–12213.
15. A. Padwa, A. D. Woolhouse and J. J. Blount, 1,3-Dipolar cycloaddition reactions of diazopyrazolinones with electron-deficient dipolarophiles, *J. Org. Chem.*, 1983, **48**, 1069–1074.
16. M. Pisset, D. Mailhol, Y. Coquerel and J. Rodriguez, Diazo-transfer reactions to 1,3-dicarbonyl compounds with tosyl azide, *Synthesis*, 2011, **2011**, 2549–2552.
17. M. L. Stivanin, A. A. G. Fernandes, A. F. da Silva, C. Y. Okada Jr. and I. D. Jurberg, Blue light-promoted N-H insertion of carbazoles, pyrazoles and 1,2,3-triazoles into aryldiazoacetates, *Adv. Synth. Cat.*, 2019, **5**, 1106–1111.
18. X. Lu, K. Yang, X. Xu, S. Sun, S. Feng, M. A. Bashir, F. Liang, J. Lin and G. Huang, Rh(II)-catalyzed Doyle–Kirmse reaction: access to unprotected 3-allyl/3-allenyl-3-(thio)oxindoles, *Org. Biomol. Chem.*, 2022, **20**, 9228–9233.
19. M. J. Jellen, M. J. Ayodele, A. Cantu, M. D. E. Forbes and M. A. Garcia-Garibay, 2D Arrays of organic qubit candidates embedded into a pillared-paddlewheel metal–organic framework, *J. Am. Chem. Soc.*, 2020, **142**, 18513–18521.
20. V. D. Dyachenko, Amine interchange of cyanothioacetamide with morpholine and synthesis of 3-amino-2-(4-acetylphenylcarbamoyl)-5-morpholinothiophene, *Rus. J. Gen. Chem.*, 2004, **74**, 641–642.
21. G. S. Sontakke, R. K. Shukla and C. M. R. Volla, Deoxygenative C2-heteroarylation of quinoline N-oxides: facile access to  $\alpha$ -triazolylquinolines, *Beilstein J. Org. Chem.*, 2021, **17**, 485–493.



22. Z. Zhou, Y. Zhao, D. Zhou, L. Li, H. Luo, L. Cui and W. Yang, Rapid and efficient synthesis of formamidines in a catalyst-free and solvent-free system, *RSC Advances*, 2021, **11**, 33868–33871.
23. F. Cotton and T. Felthouse, Structural studies of three tetrakis(carboxylato)dirhodium(II) adducts in which carboxylate groups and axial ligands are varied, *Inorg. Chem.*, 1980, **19**, 323–328.
24. H. Tsutsui, T. Abe, S. Nakamura, M. Anada and S. Hashimoto, Practical synthesis of dirhodium(II) tetrakis[*N*-phthaloyl-(*S*)-tert-leucinate], *Chem. Pharm. Bull.* 2005, **53**, 1366–1368.
25. P. Müller, Y. Allenbach and E. Robert, Rhodium(II)-catalyzed olefin cyclopropanation with the phenyliodonium ylide derived from Meldrum's acid, *Tetrahedron Asymm.* 2003, **14**, 779–785.
26. V. Ilkin, V. Berseneva, T. Beryozkina, T. Glukhareva, L. Dianova, W. Dehaen, E. Seliverstova and V. A. Bakulev, Regioselective synthesis of heterocyclic *N*-sulfonyl amidines from heteroaromatic thioamides and sulfonyl azides, *Beilstein J. Org. Chem.* 2020, **16**, 2937–2947.
27. K. O. Marichev, Y. Wang, A. M. Carranco, E. C. Garcia, Z.-X. Yu and M. P. Doyle, Rhodium(II)-catalyzed generation of cycloprop-1-en-1-yl ketones and their rearrangement to 5-aryl-2-siloxyfurans, *Chem. Comm.* 2018, **54**, 9513–9516.
28. G. K. Murphy, F. Z. Abbas and A. V. Poulton,  $\alpha,\alpha$ -Dichlorination of oxindole derivatives using (dichloroiodo)benzene, *Adv. Synth. Cat.*, 2014, **14–15**, 2919–2923.
29. A. G. Griesbeck, J. Neudörfl and A. de Kiff, Photoinduced electron-transfer chemistry of the bielelectrophoric *N*-phthaloyl derivatives of the amino acids tyrosine, histidine and tryptophan, *Beilstein J. Org. Chem.* 2011, **7**, 518–524.

# NMR $^1\text{H}$ , $^{13}\text{C}$ and $^{19}\text{F}$ Spectra

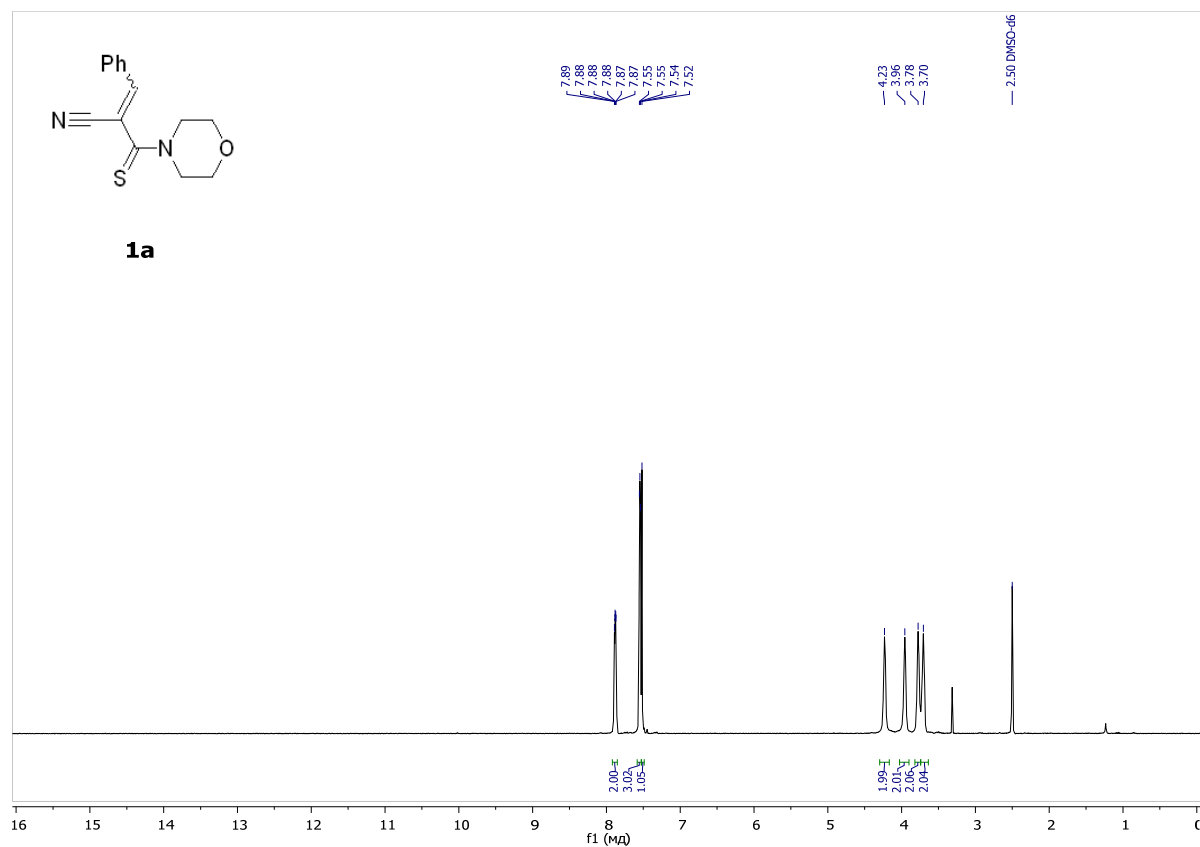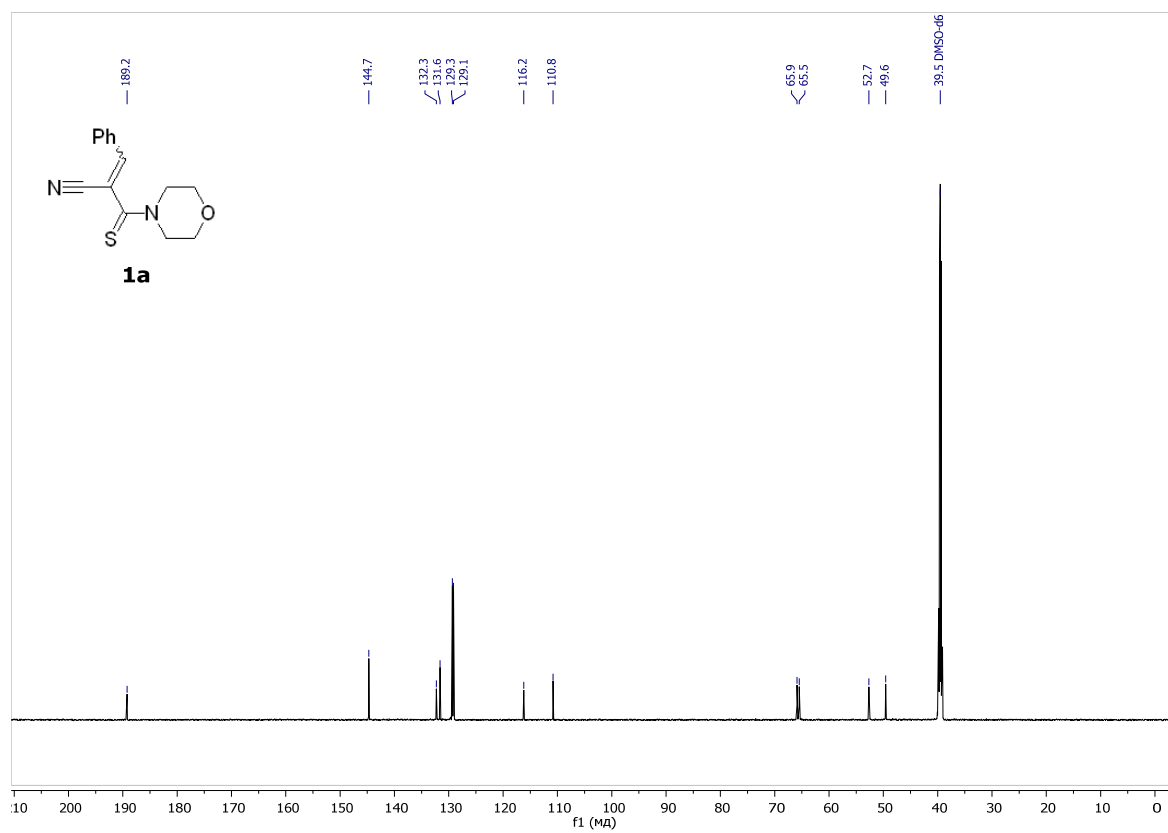

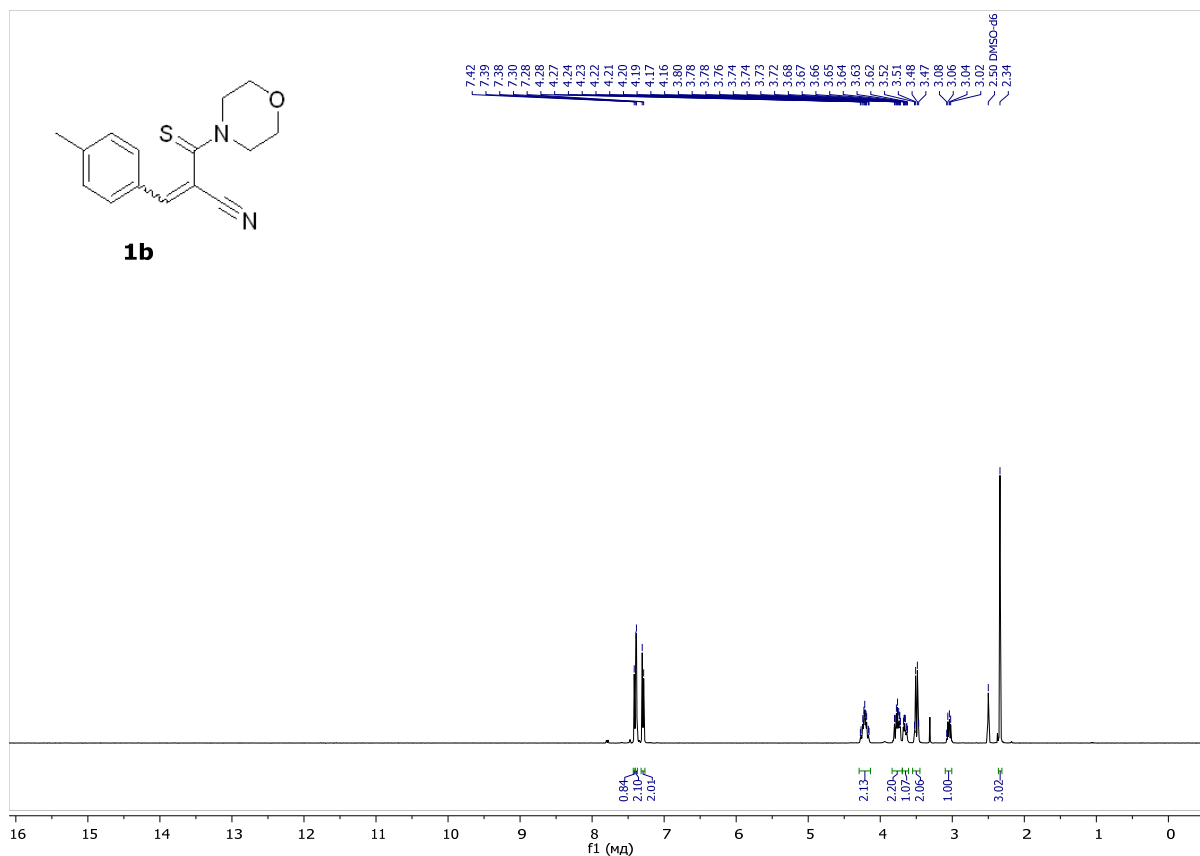

$^1\text{H NMR}$  (400 MHz,  $\text{DMSO-}d_6$ ) of **1b**

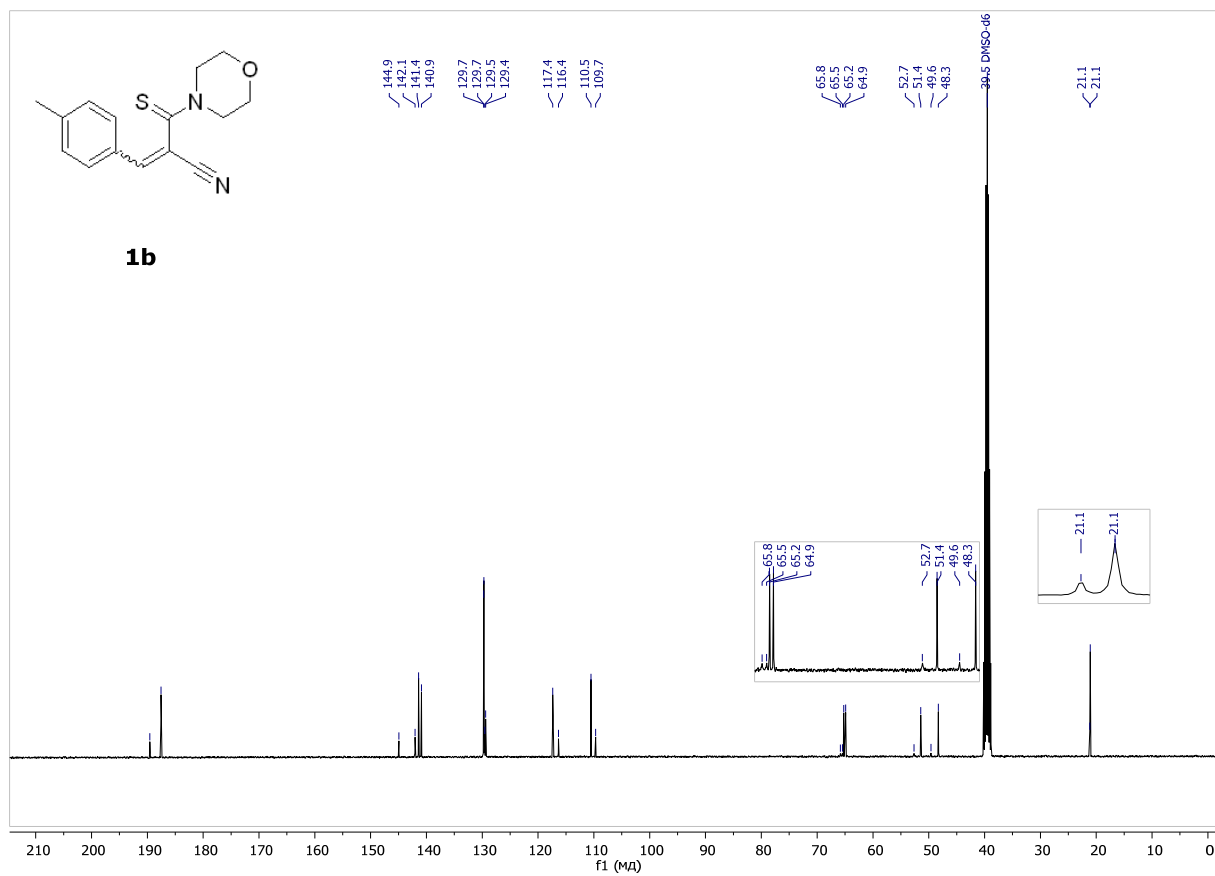

$^{13}\text{C}\{^1\text{H}\}$  NMR (100 MHz,  $\text{DMSO-}d_6$ ) of **1b**

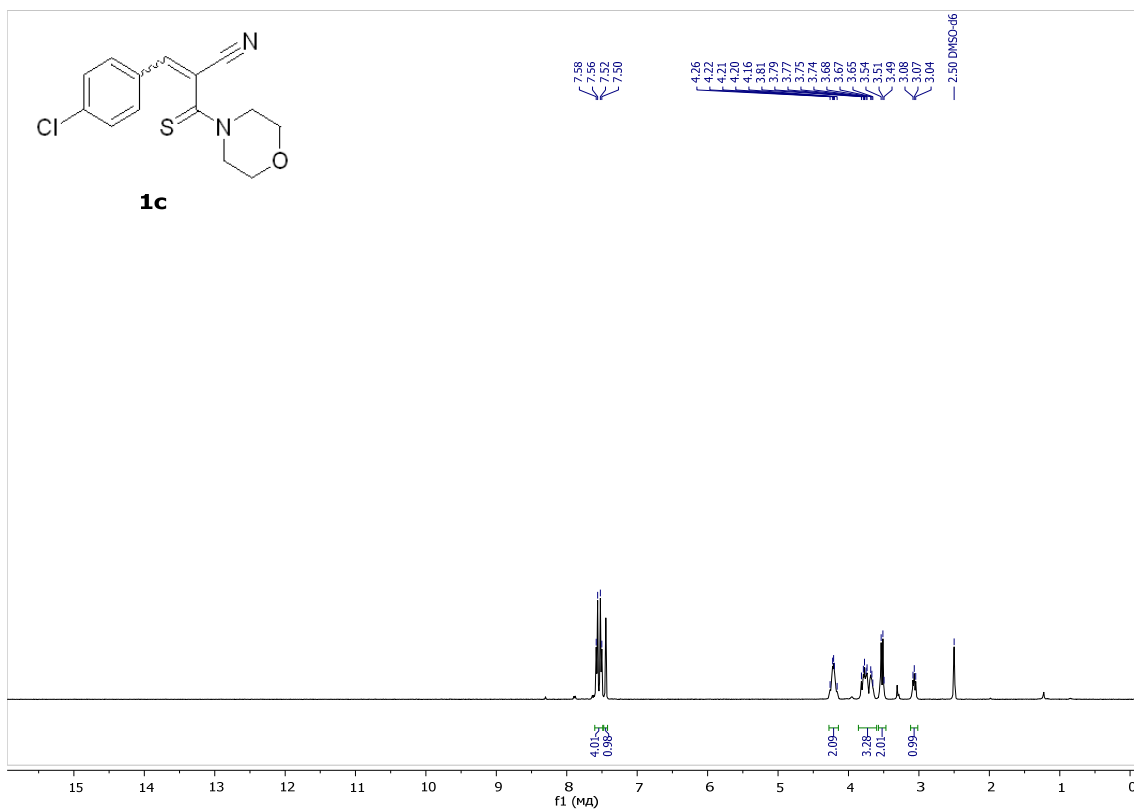

<sup>1</sup>H NMR (400 MHz, DMSO-*d*<sub>6</sub>) of **1c**

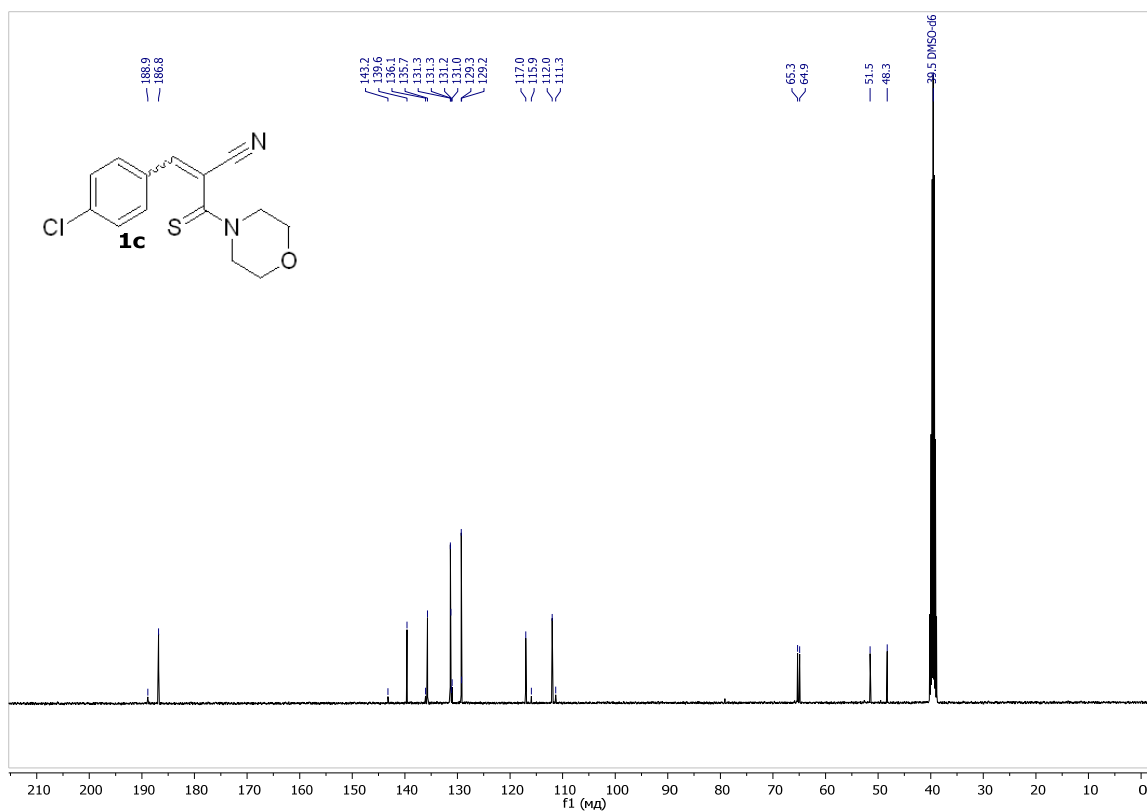

<sup>13</sup>C {<sup>1</sup>H} NMR (100 MHz, DMSO-*d*<sub>6</sub>) of **1c**

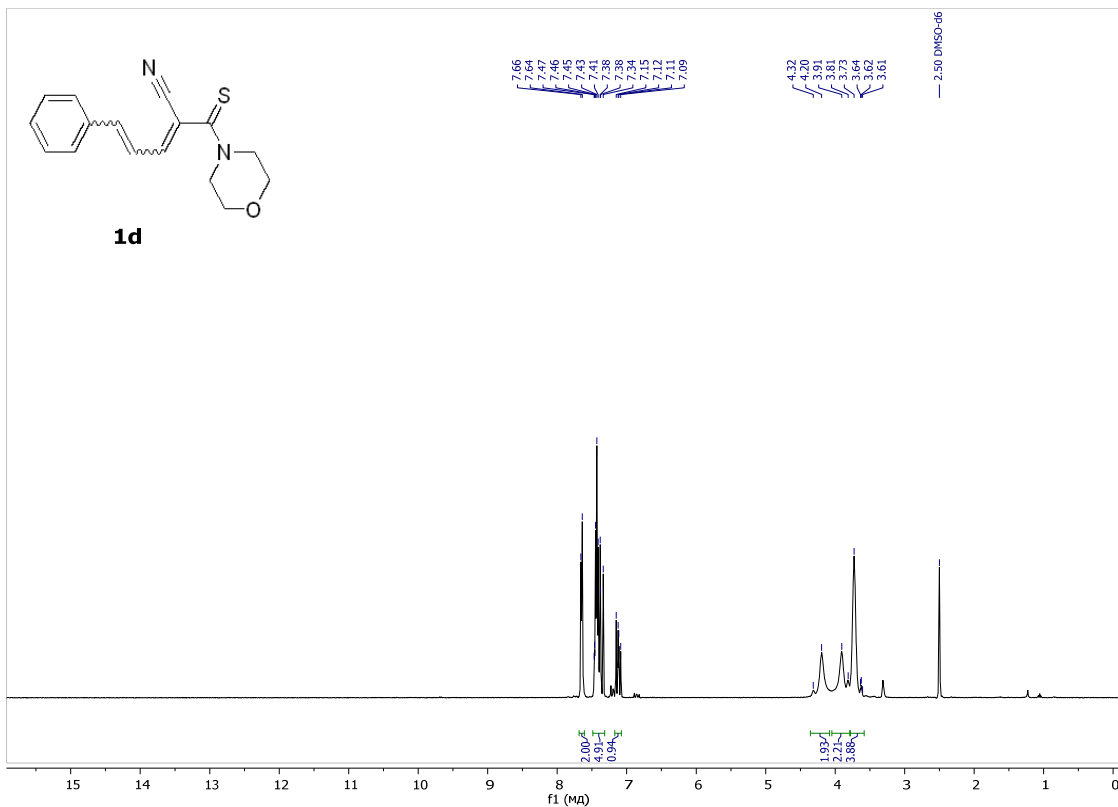

<sup>1</sup>H NMR (400 MHz, DMSO-*d*<sub>6</sub>) of **1d**

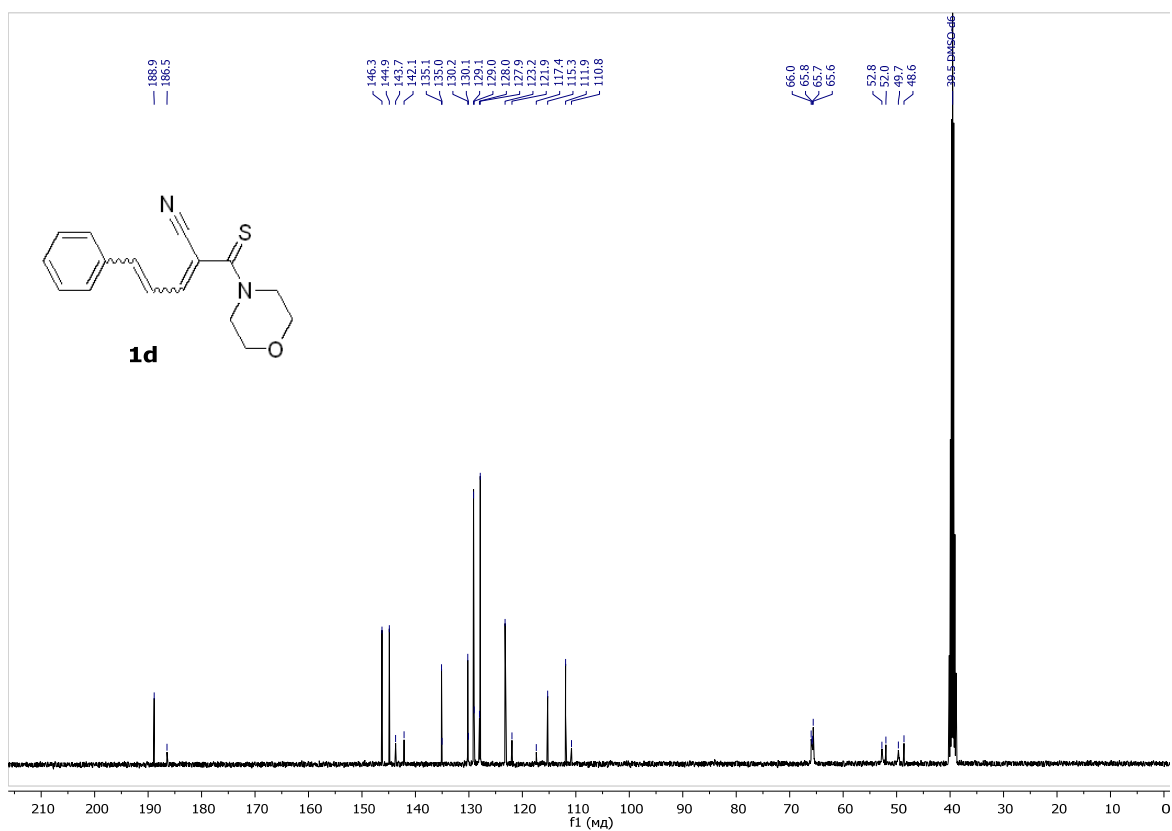

<sup>13</sup>C {<sup>1</sup>H} NMR (100 MHz, DMSO-*d*<sub>6</sub>) of **1d**

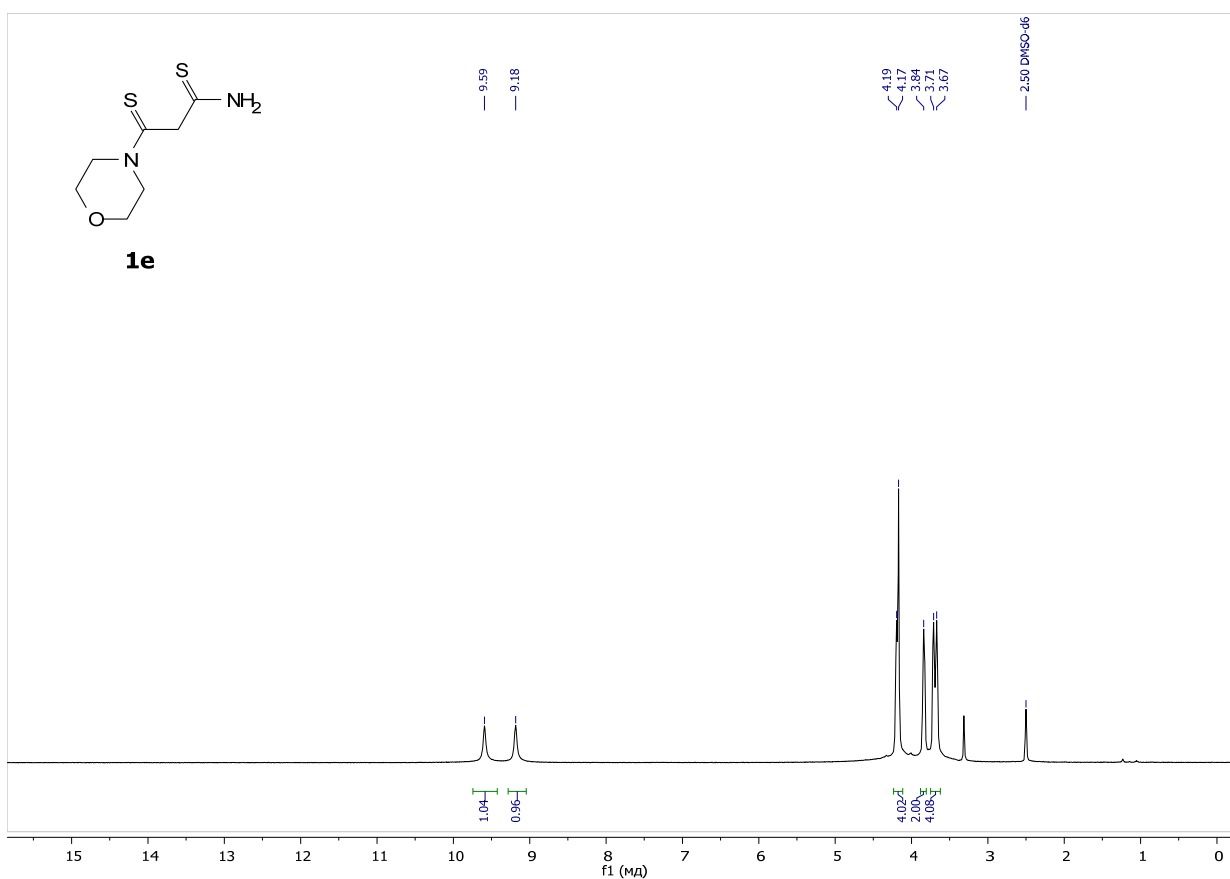

$^1\text{H}$  NMR (400 MHz, DMSO- $d_6$ ) of **1e**

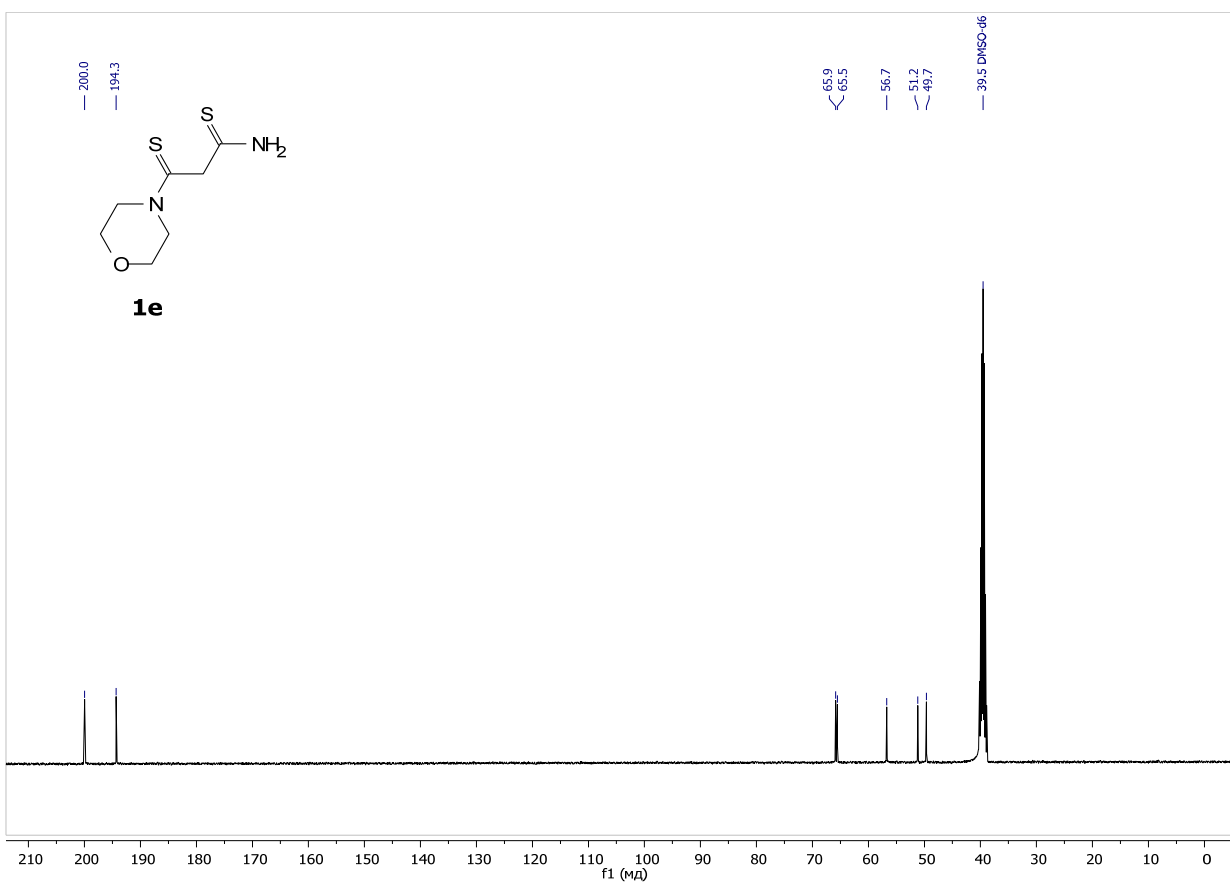

$^{13}\text{C}\{^1\text{H}\}$  NMR (100 MHz, DMSO- $d_6$ ) of **1e**

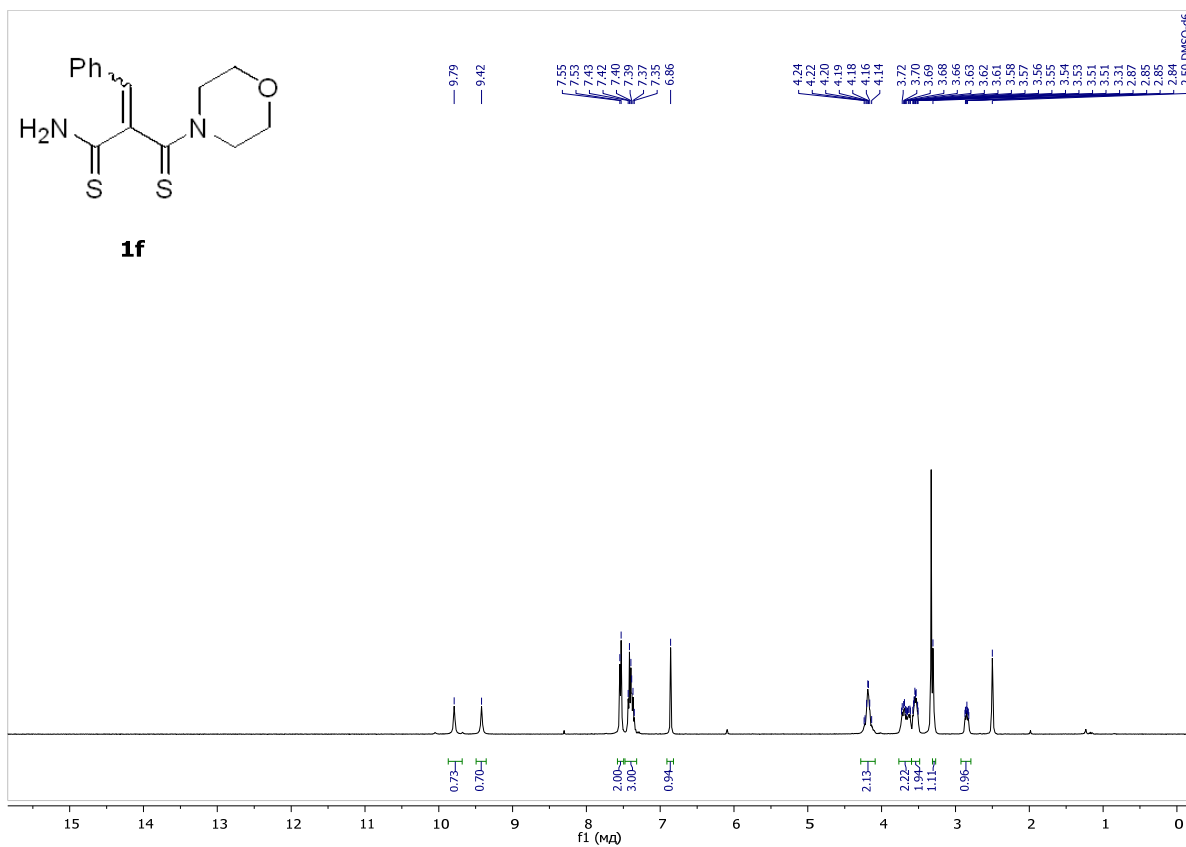

<sup>1</sup>H NMR (400 MHz, DMSO-*d*<sub>6</sub>) of **1f**

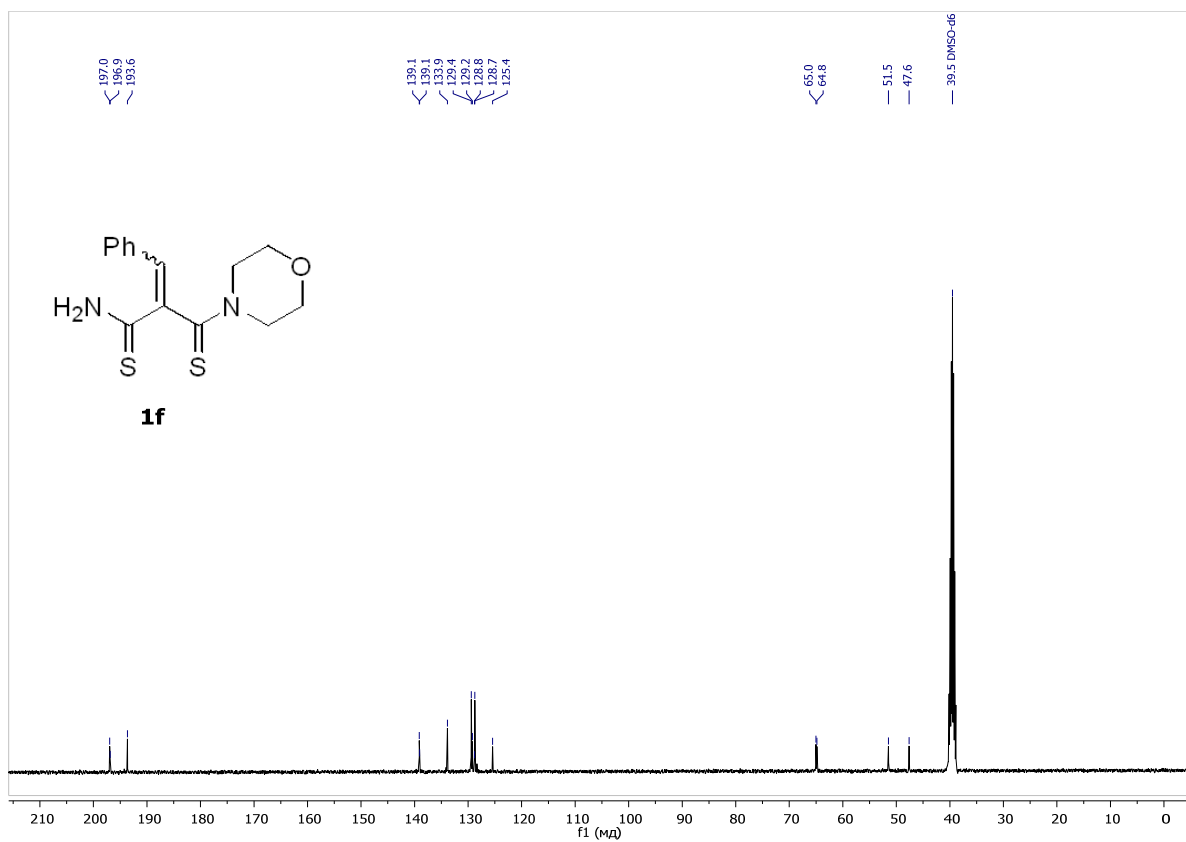

<sup>13</sup>C {<sup>1</sup>H} NMR (100 MHz, DMSO-*d*<sub>6</sub>) of **1f**

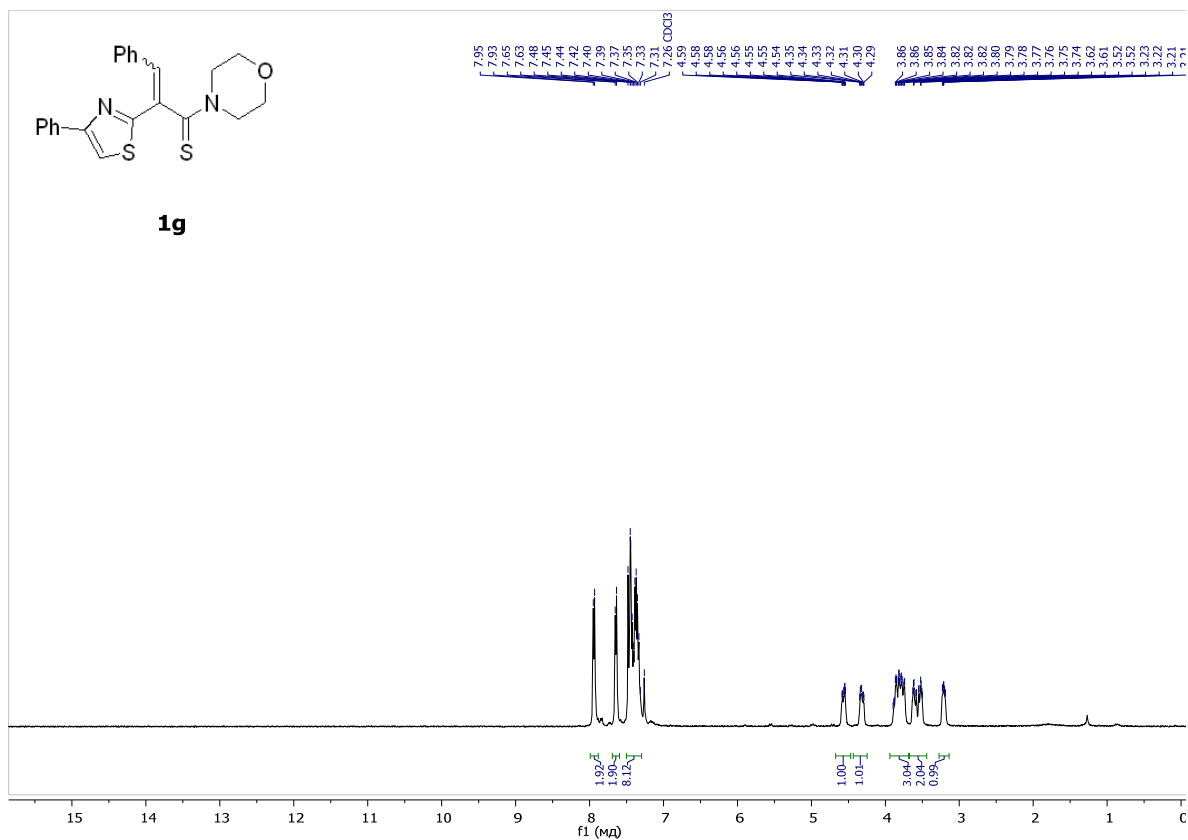

$^1\text{H NMR}$  (400 MHz,  $\text{CDCl}_3-d$ ) of **1g**

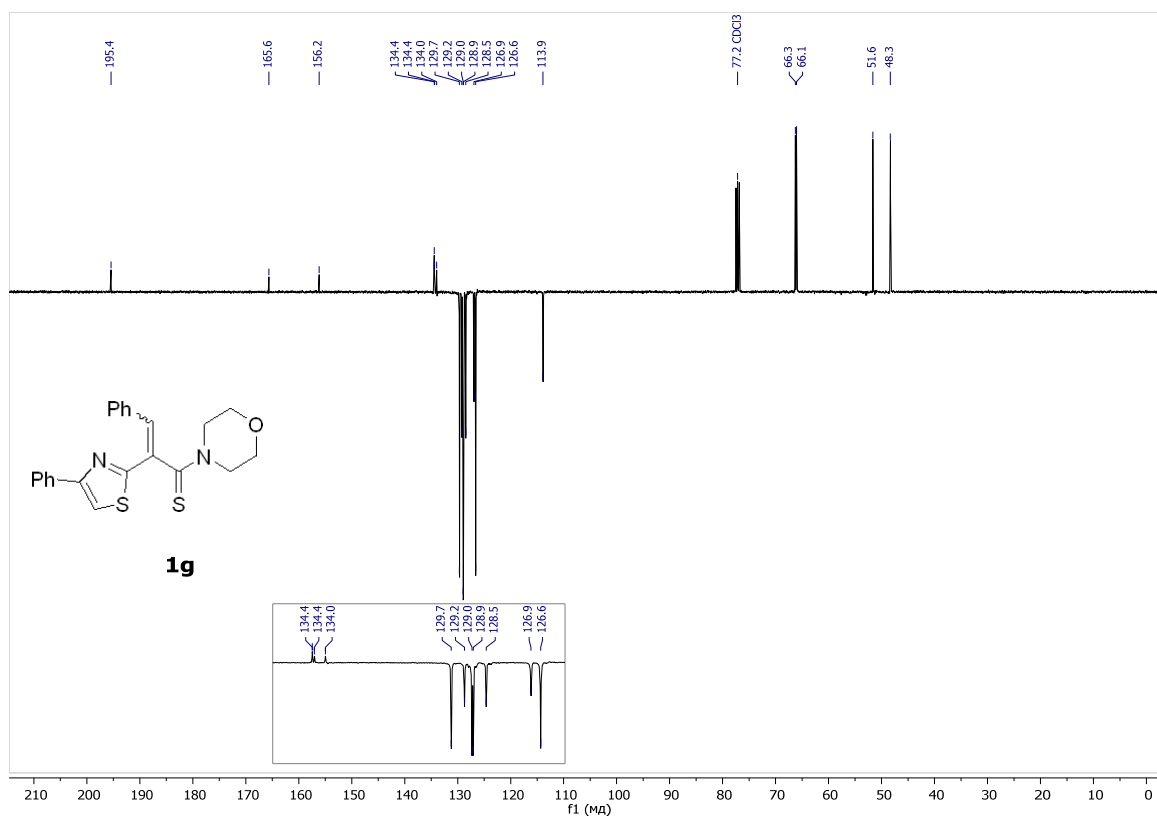

$^{13}\text{C}\{^1\text{H}\}$  NMR (100 MHz,  $\text{CDCl}_3-d$ ) of **1g**



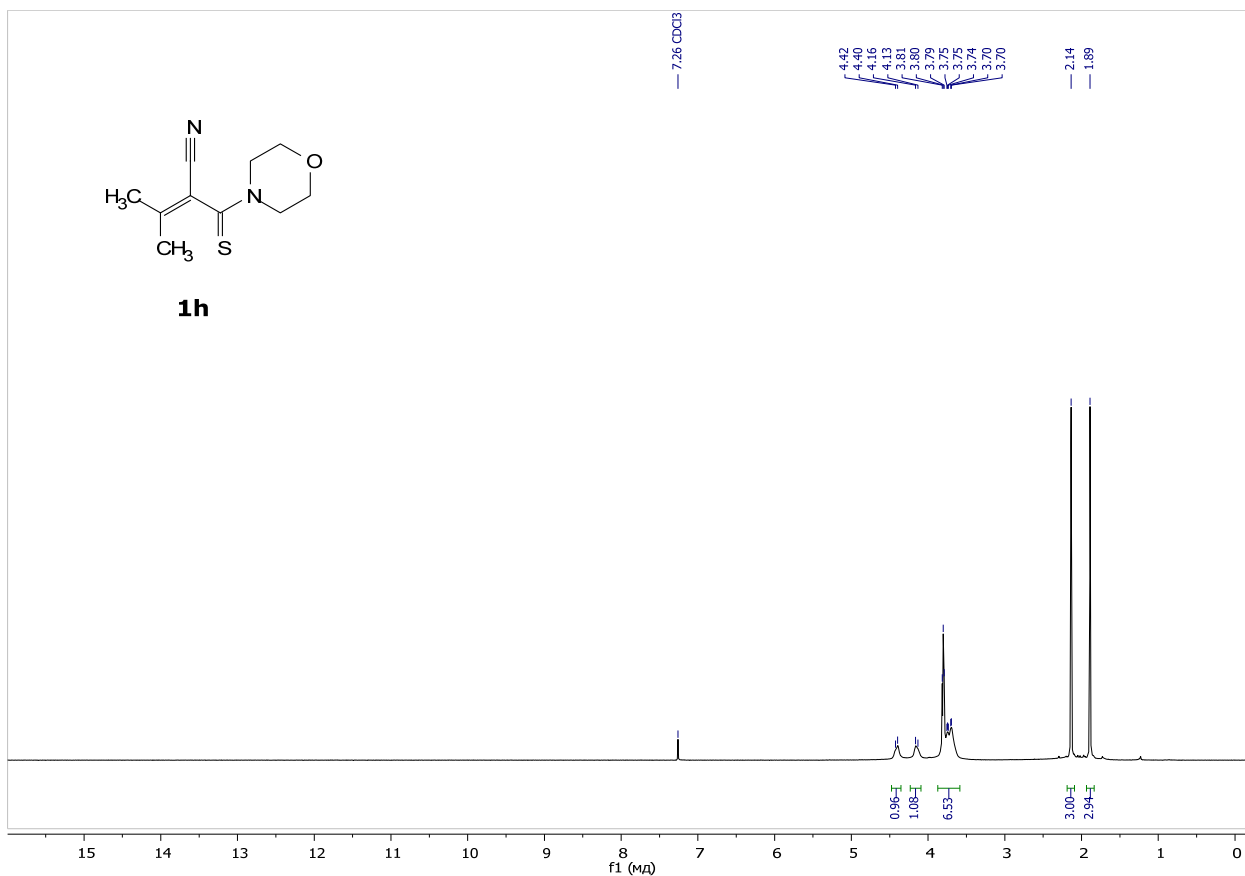

<sup>1</sup>H NMR (400 MHz, CDCl<sub>3</sub>-*d*) of **1h**

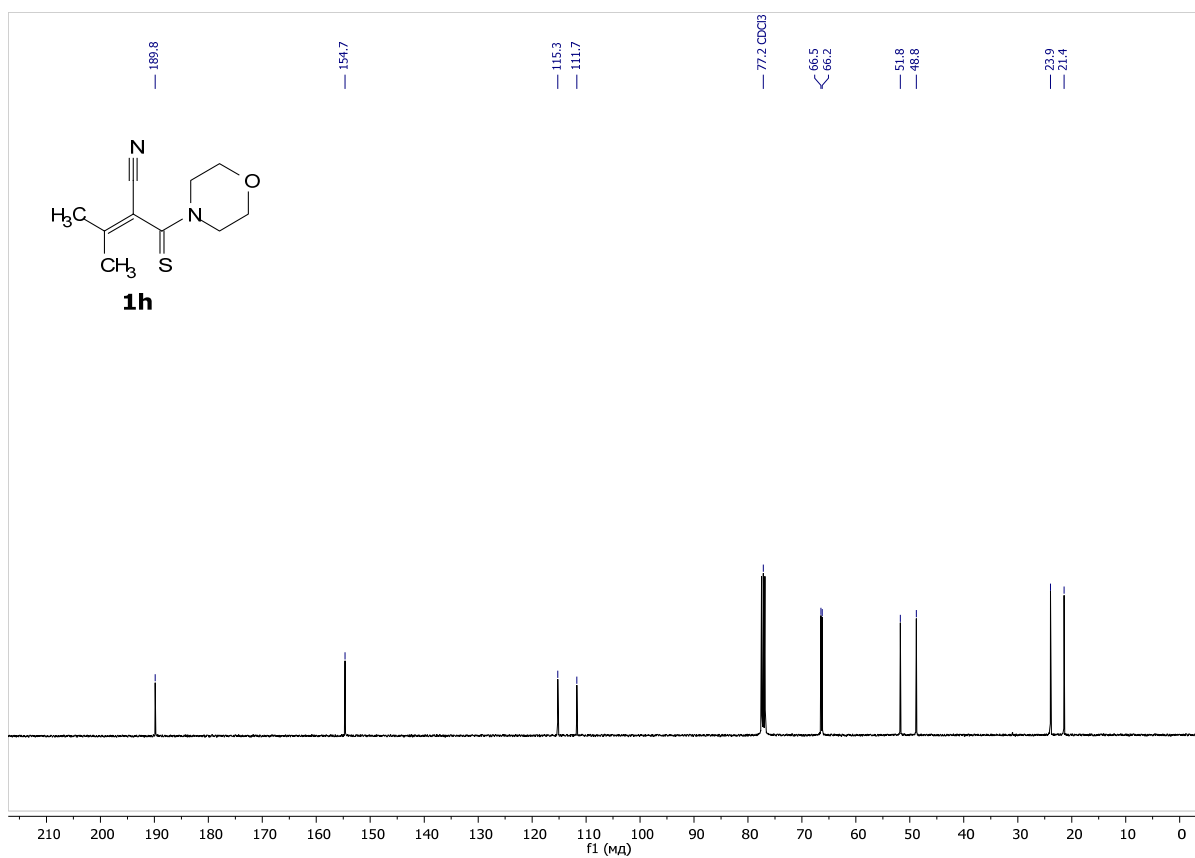

<sup>13</sup>C {<sup>1</sup>H} NMR (100 MHz, CDCl<sub>3</sub>-*d*) of **1h**

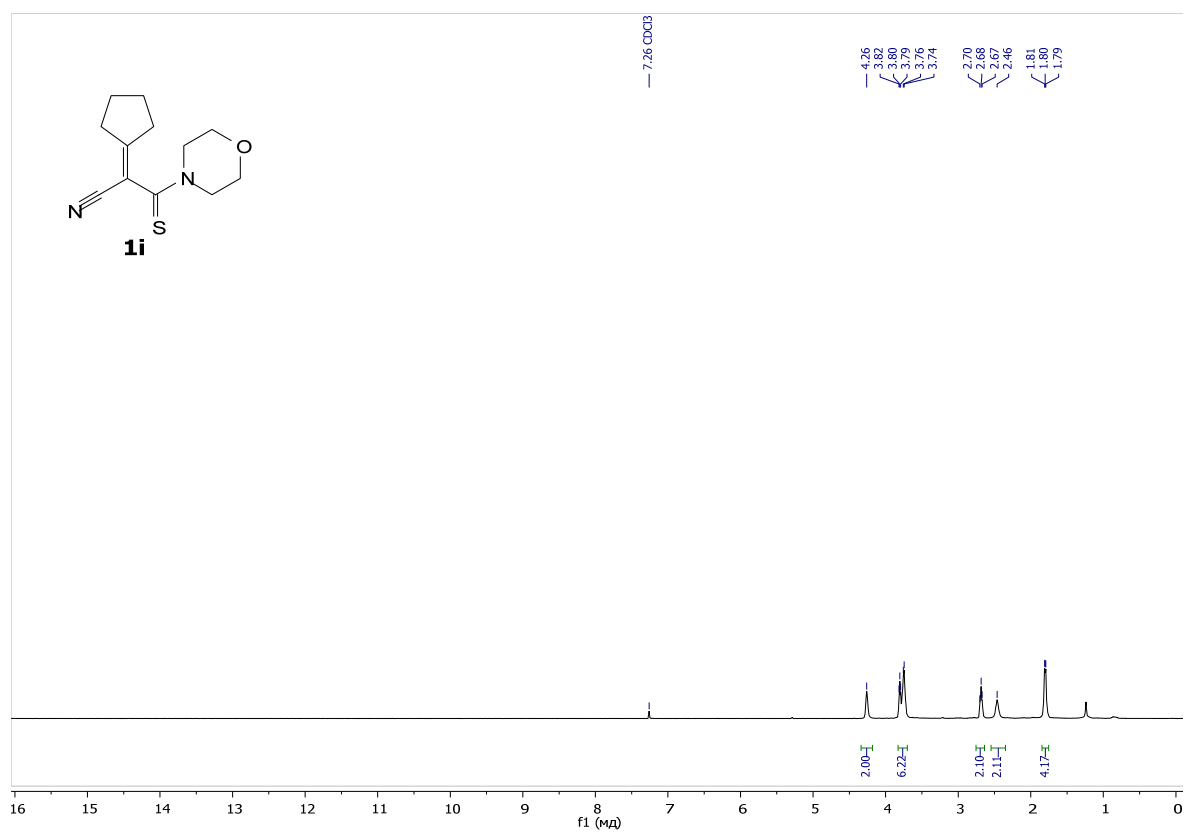

$^1\text{H NMR}$  (400 MHz,  $\text{CDCl}_3-d$ ) of **1i**

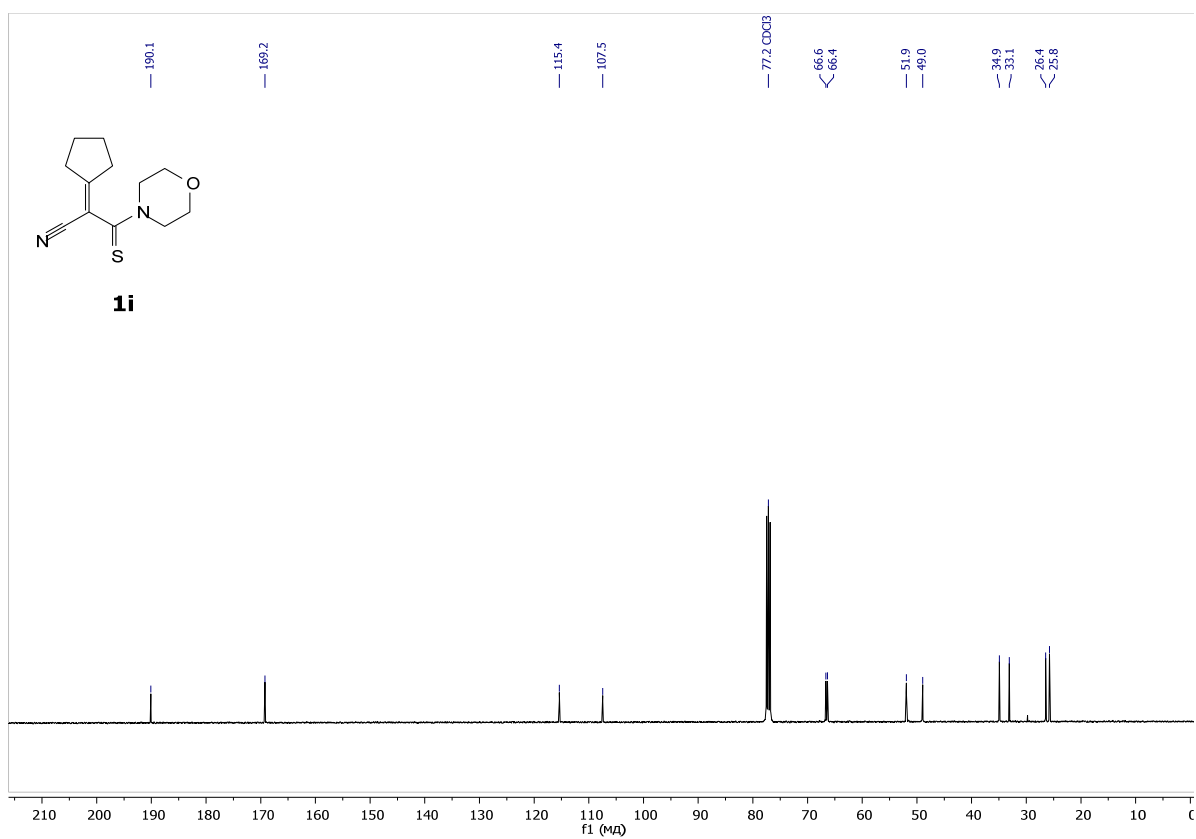

$^{13}\text{C}\{^1\text{H}\}$  NMR (100 MHz,  $\text{CDCl}_3-d$ ) of **1i**

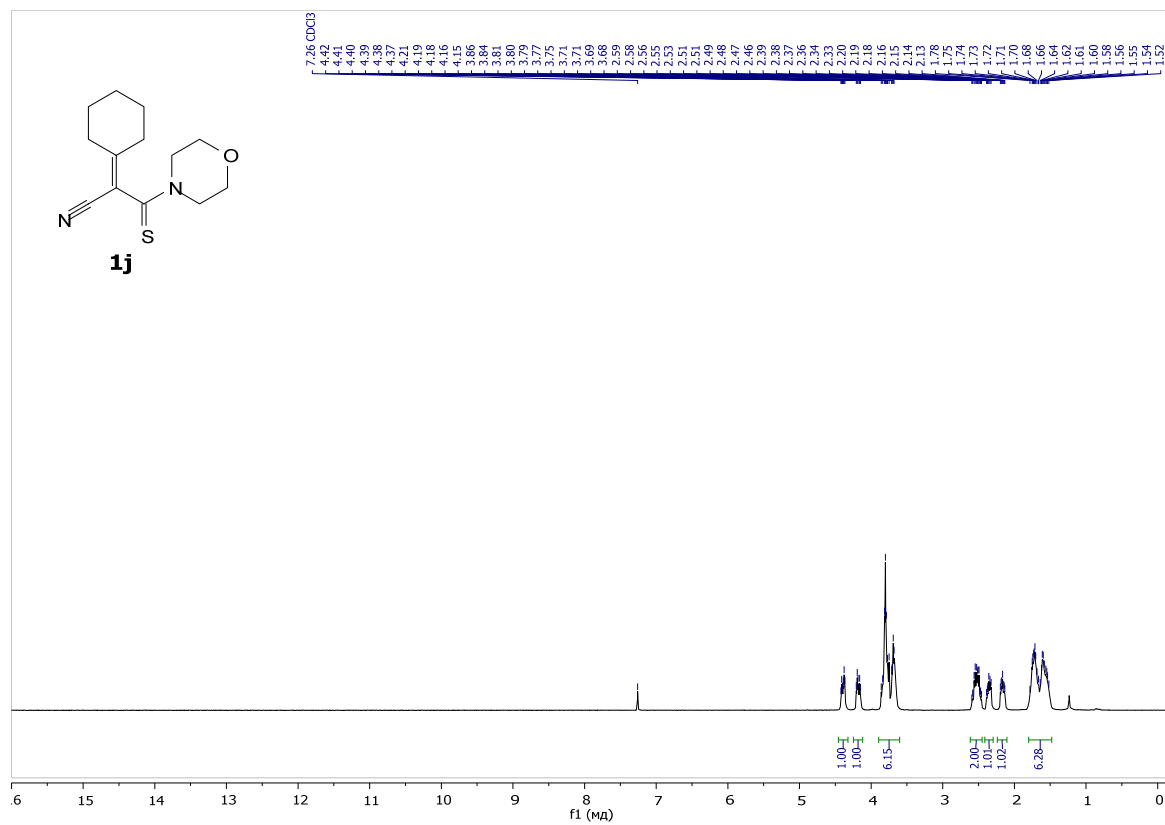

<sup>1</sup>H NMR (400 MHz, CDCl<sub>3</sub>-d) of **1j**

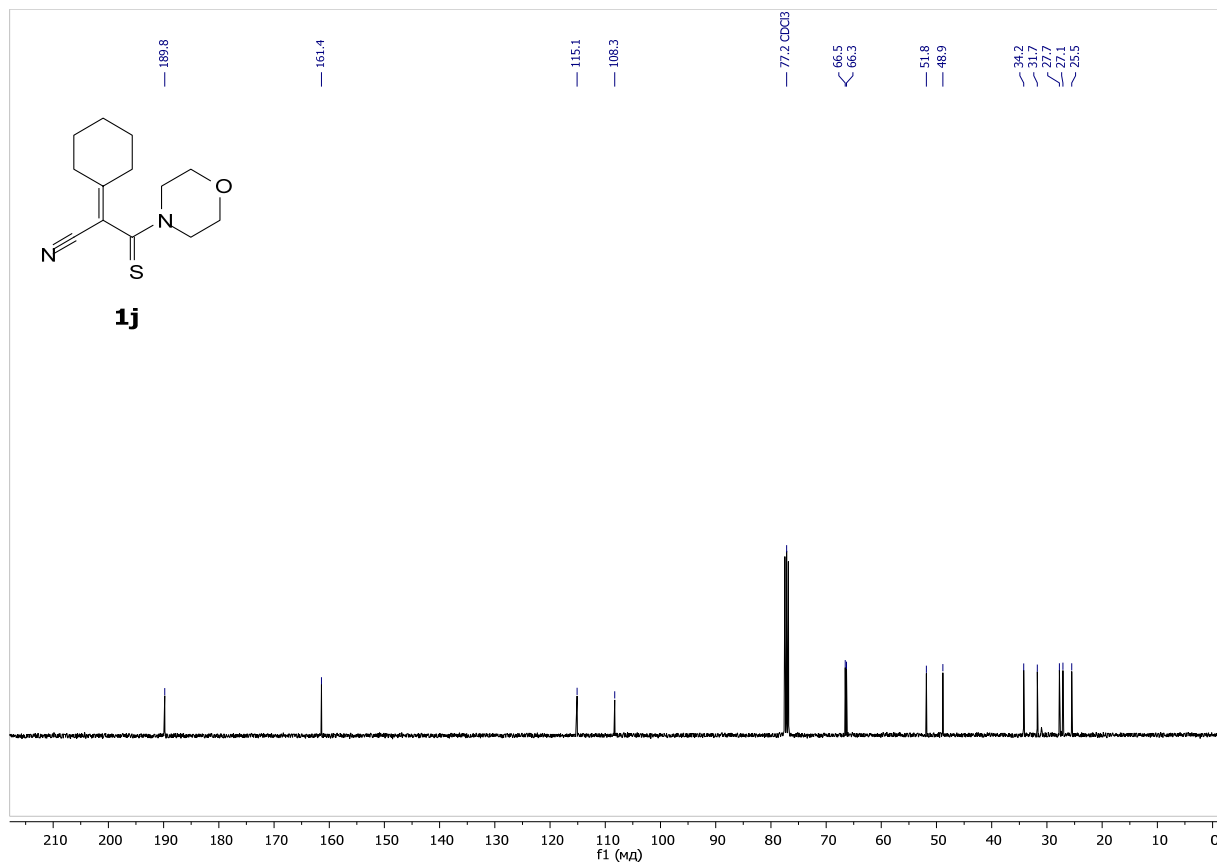

<sup>13</sup>C{<sup>1</sup>H} NMR (100 MHz, CDCl<sub>3</sub>-d) of **1j**

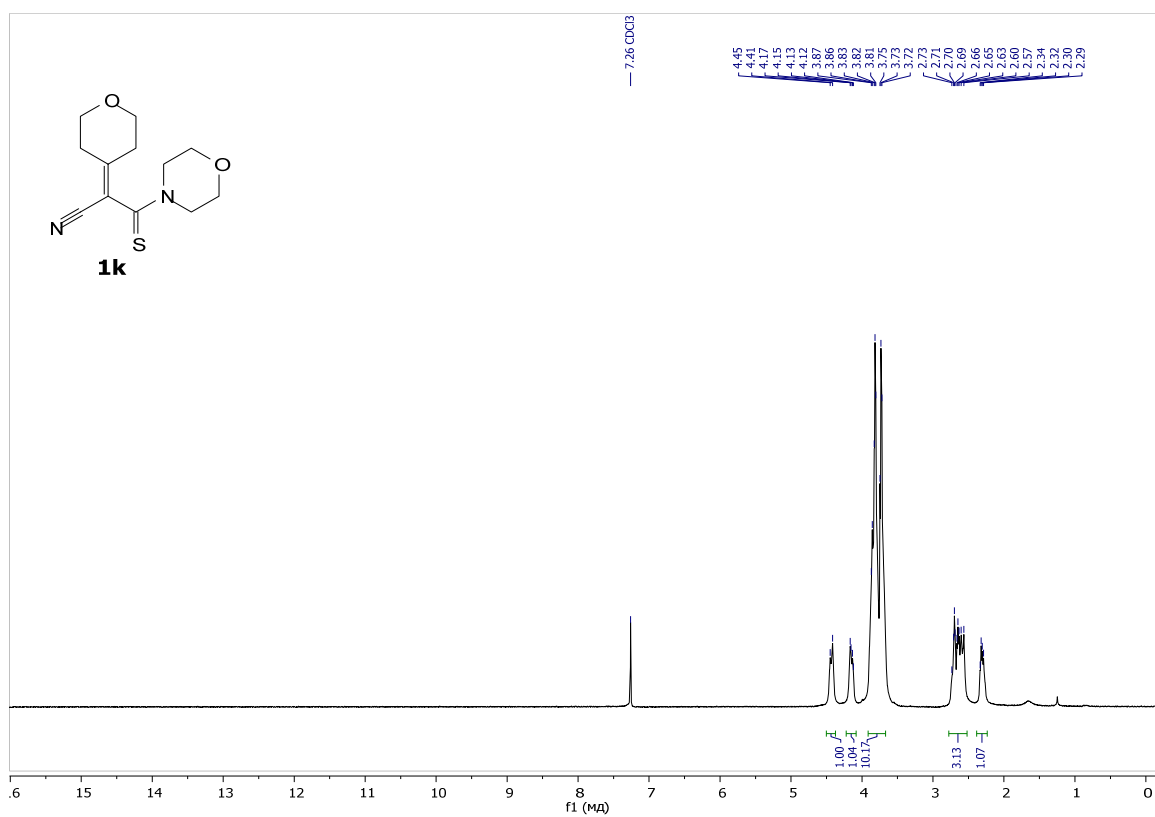

<sup>1</sup>H NMR (400 MHz, CDCl<sub>3</sub>-d) of **1k**

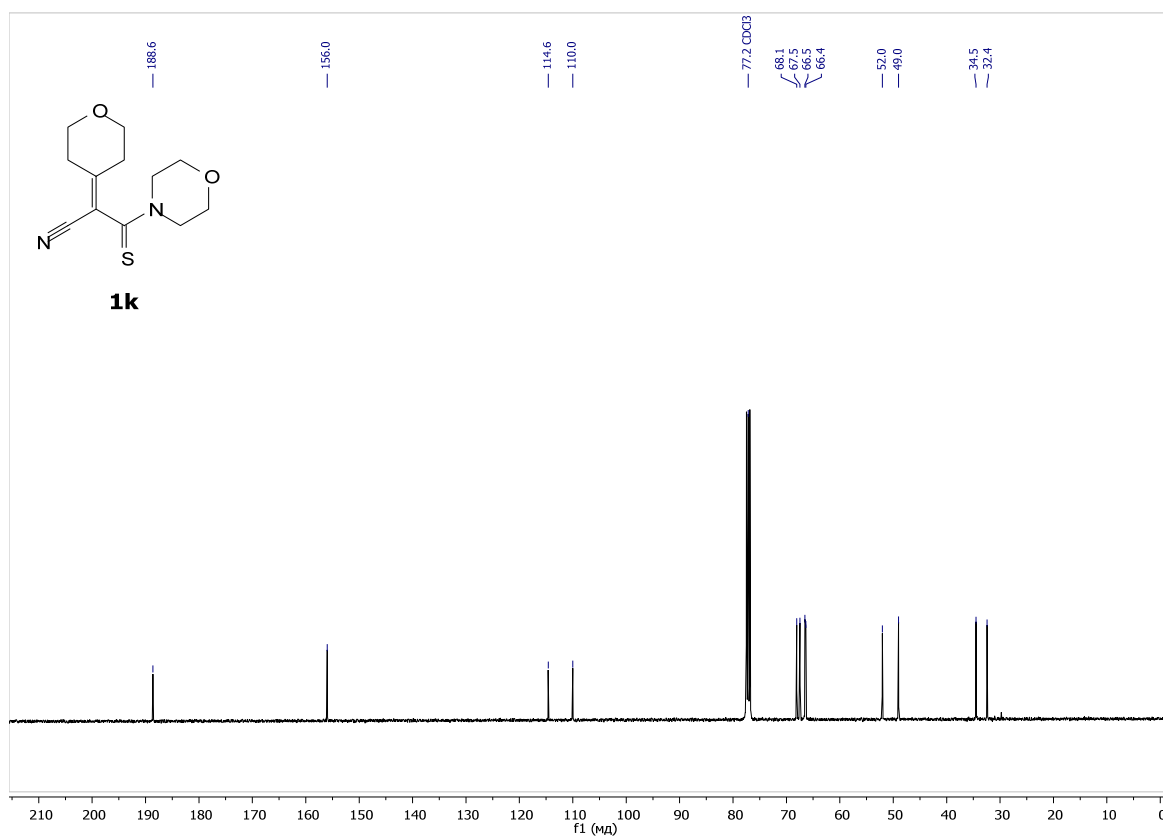

<sup>13</sup>C {<sup>1</sup>H} NMR (100 MHz, CDCl<sub>3</sub>-d) of **1k**

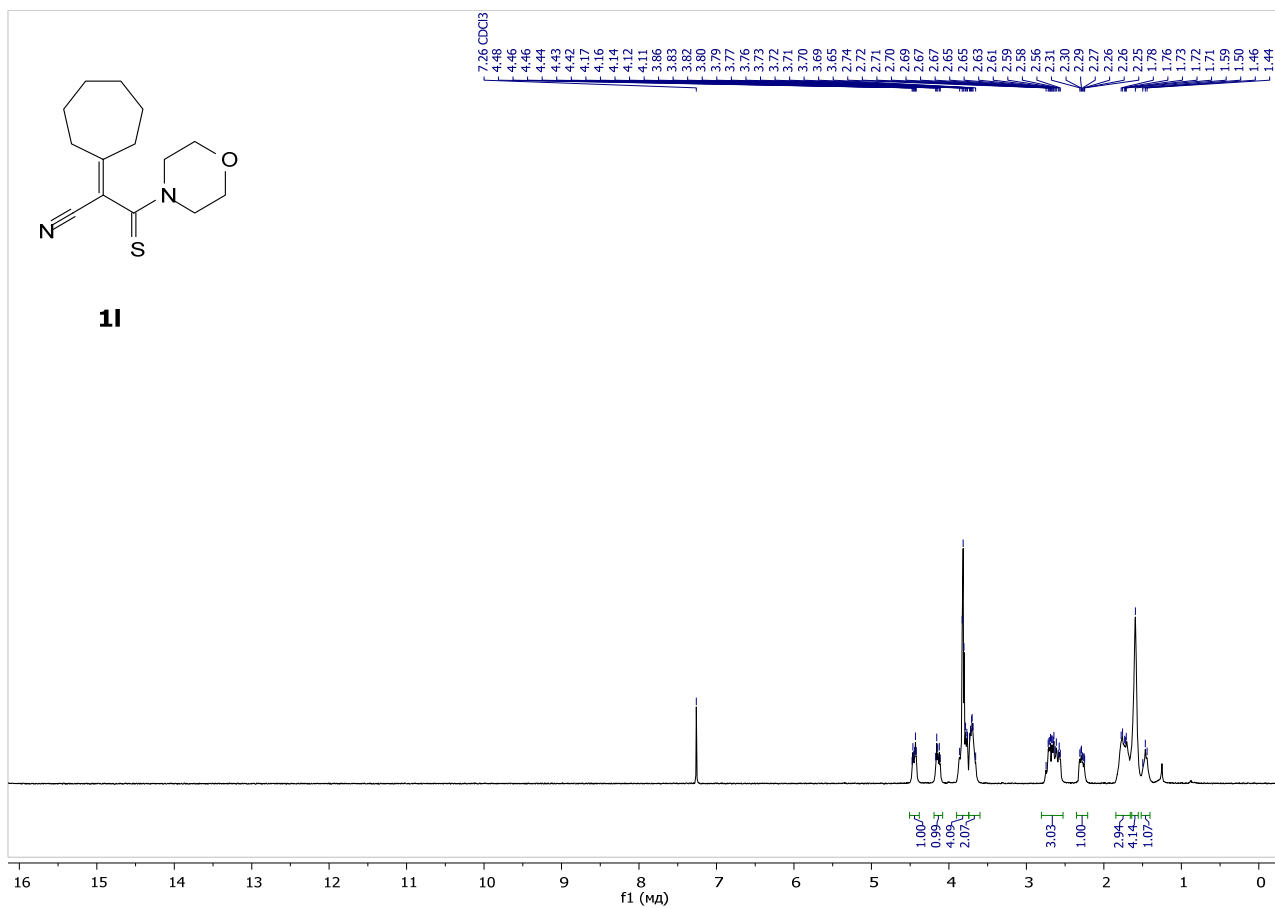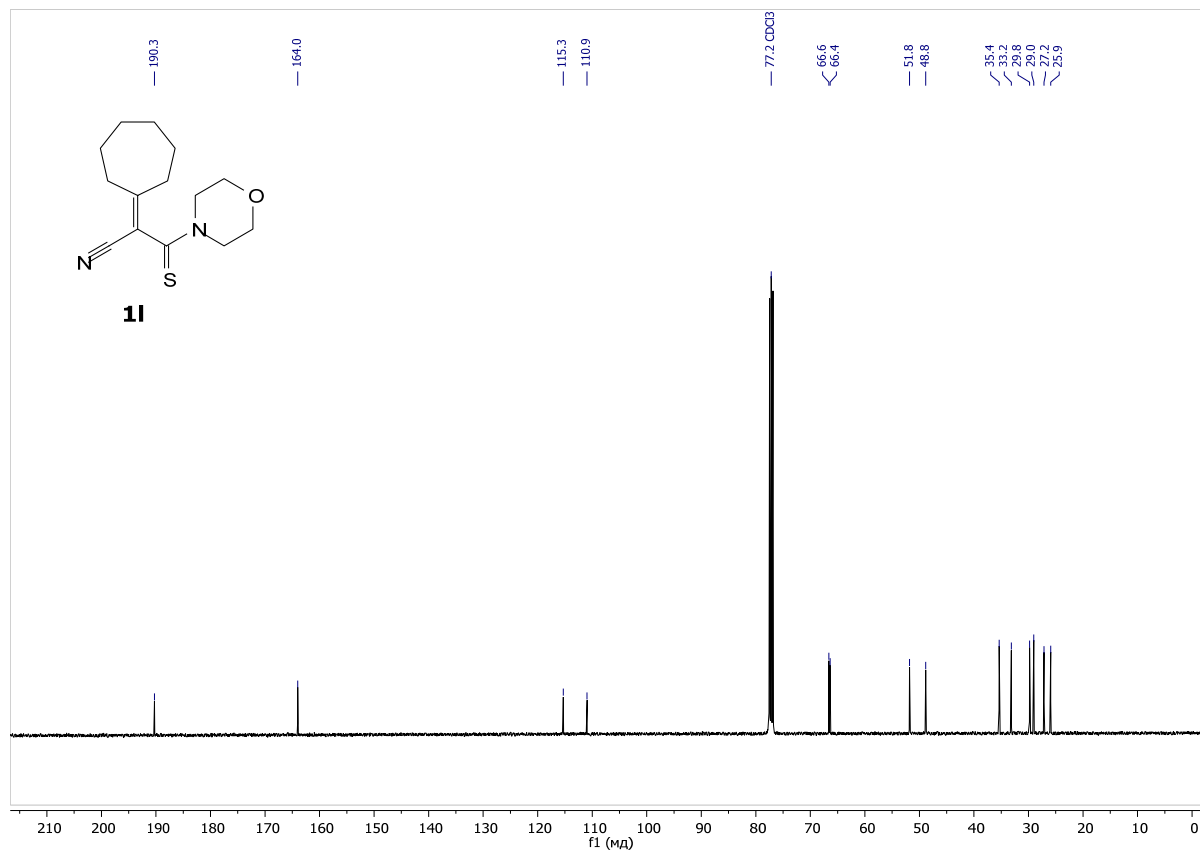

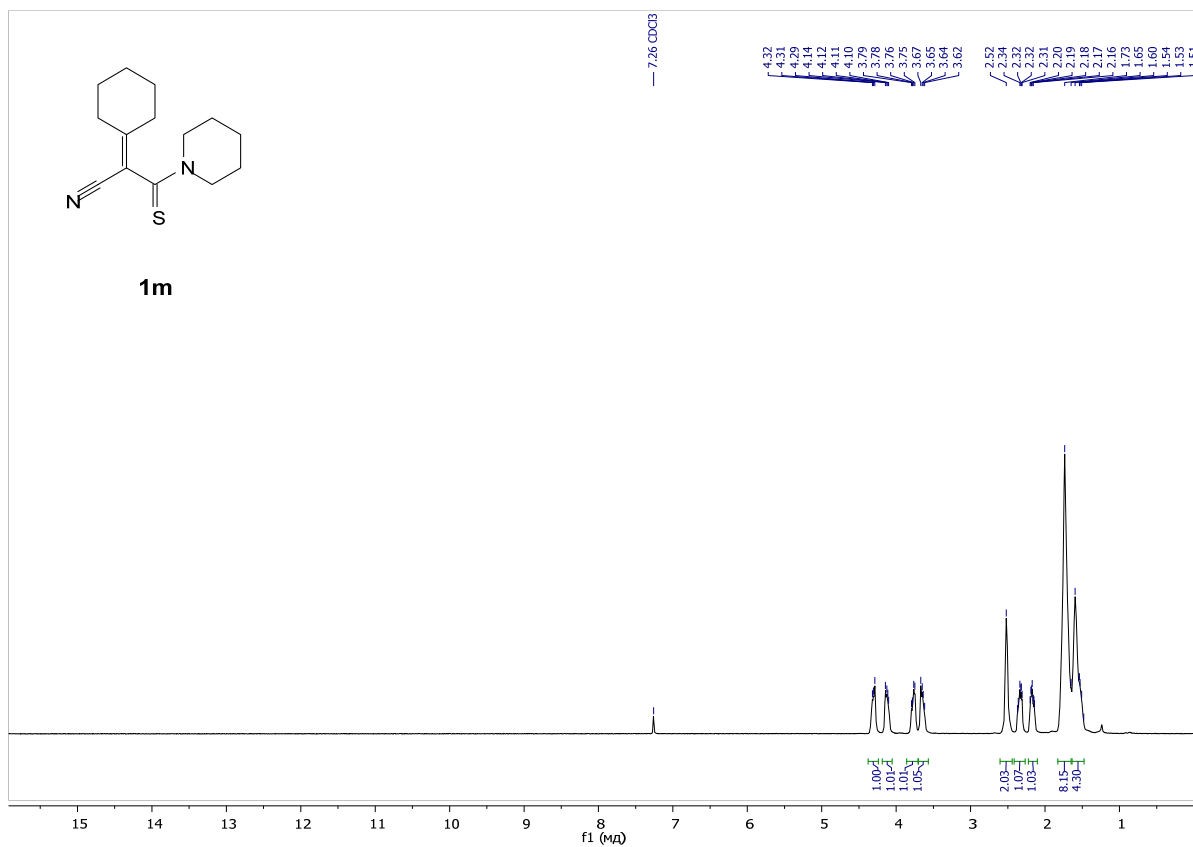

$^1\text{H}$  NMR (400 MHz,  $\text{CDCl}_3-d$ ) of **1m**

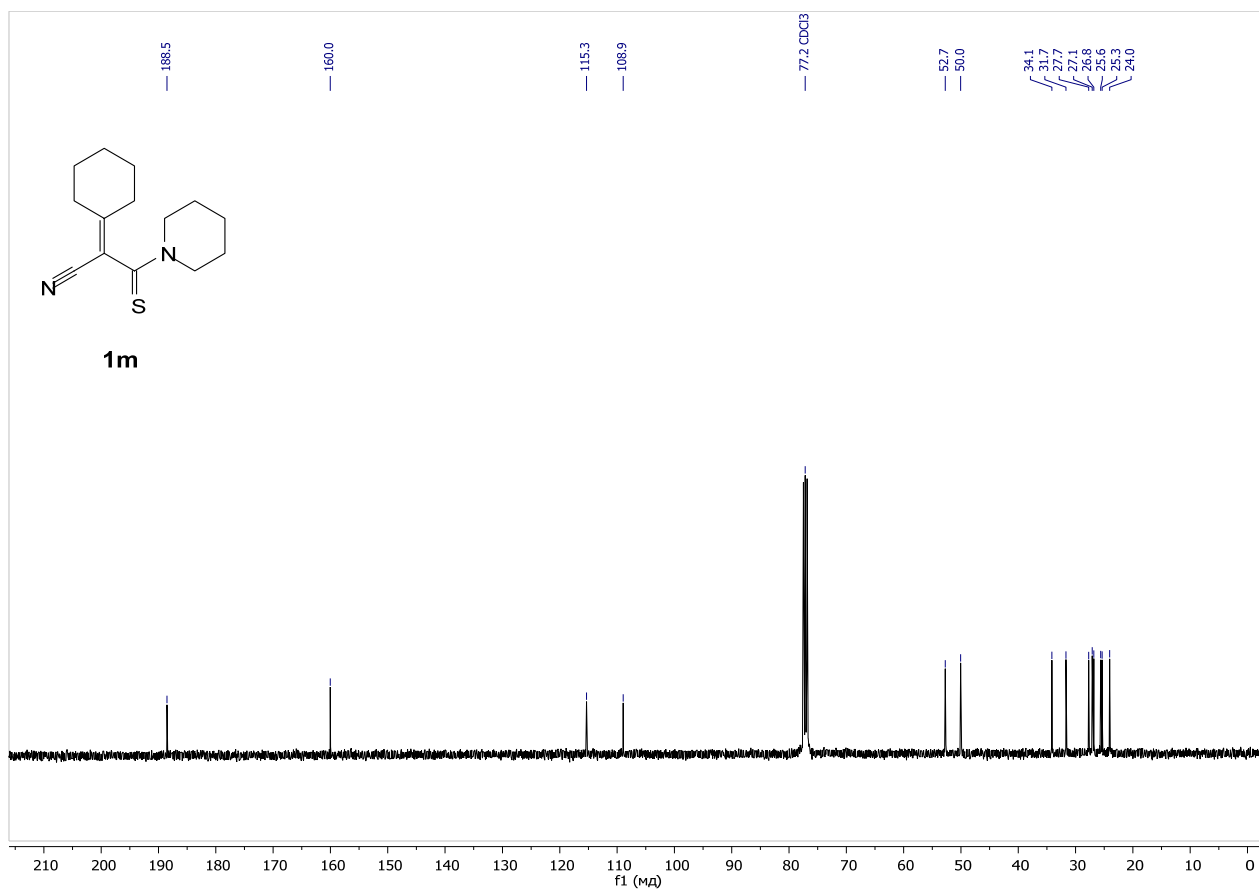

$^{13}\text{C}$  NMR (100 MHz,  $\text{CDCl}_3-d$ ) of **1m**

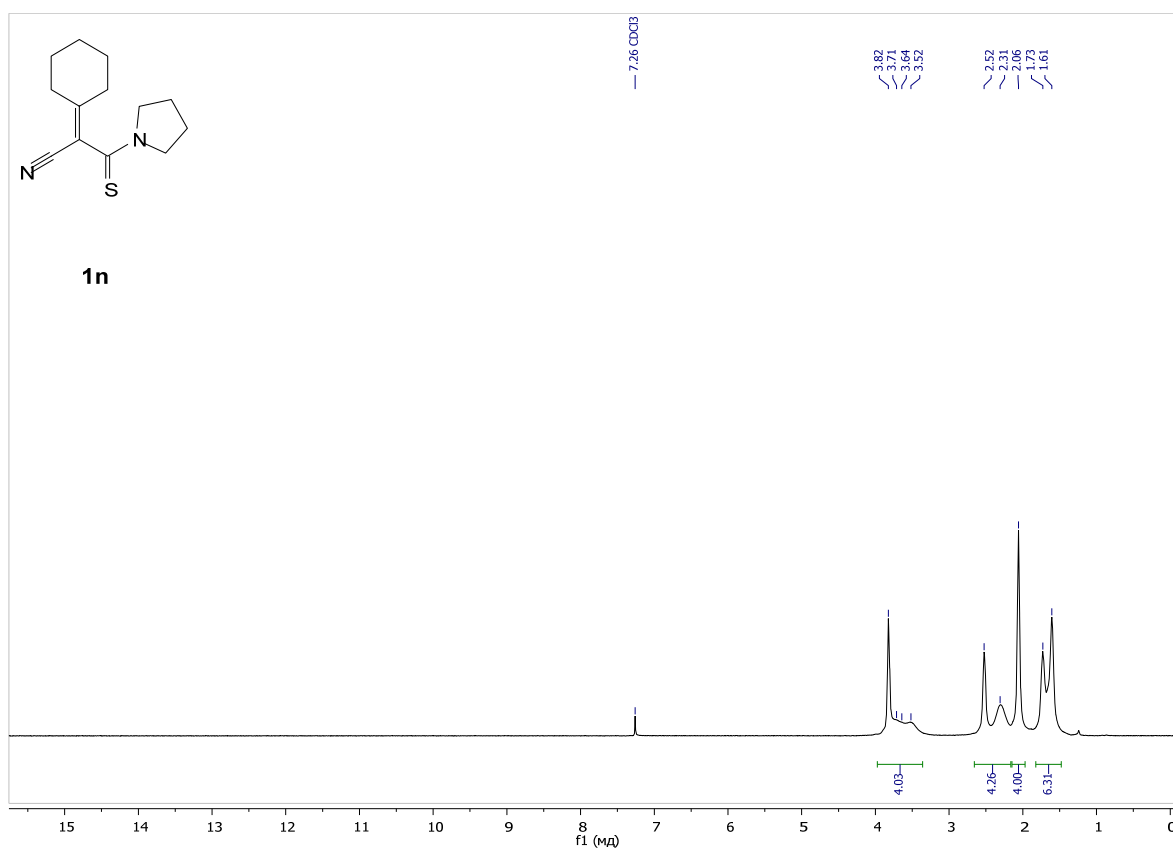

$^1\text{H}$  NMR (400 MHz,  $\text{CDCl}_3-d$ ) of **1n**

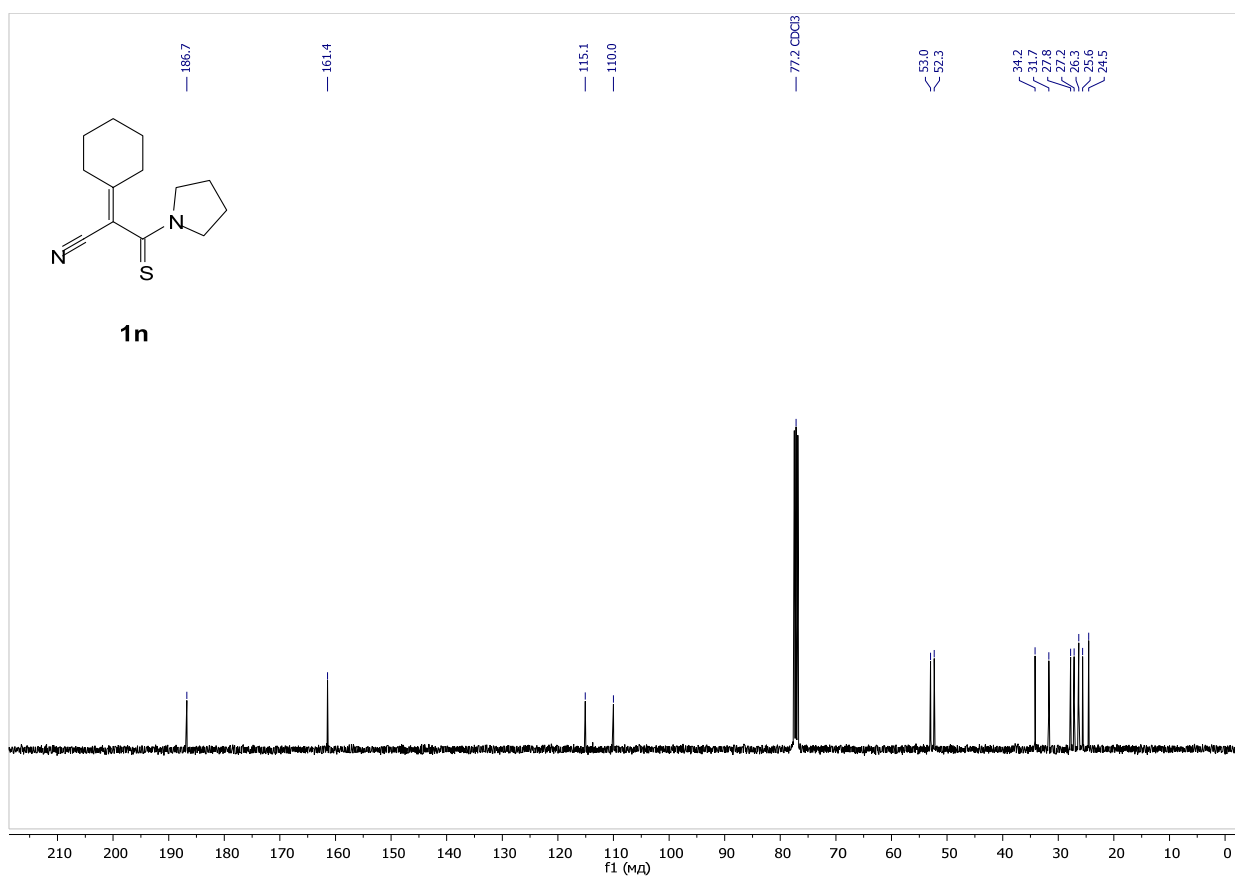

$^{13}\text{C}\{^1\text{H}\}$  NMR (100 MHz,  $\text{CDCl}_3-d$ ) of **1n**

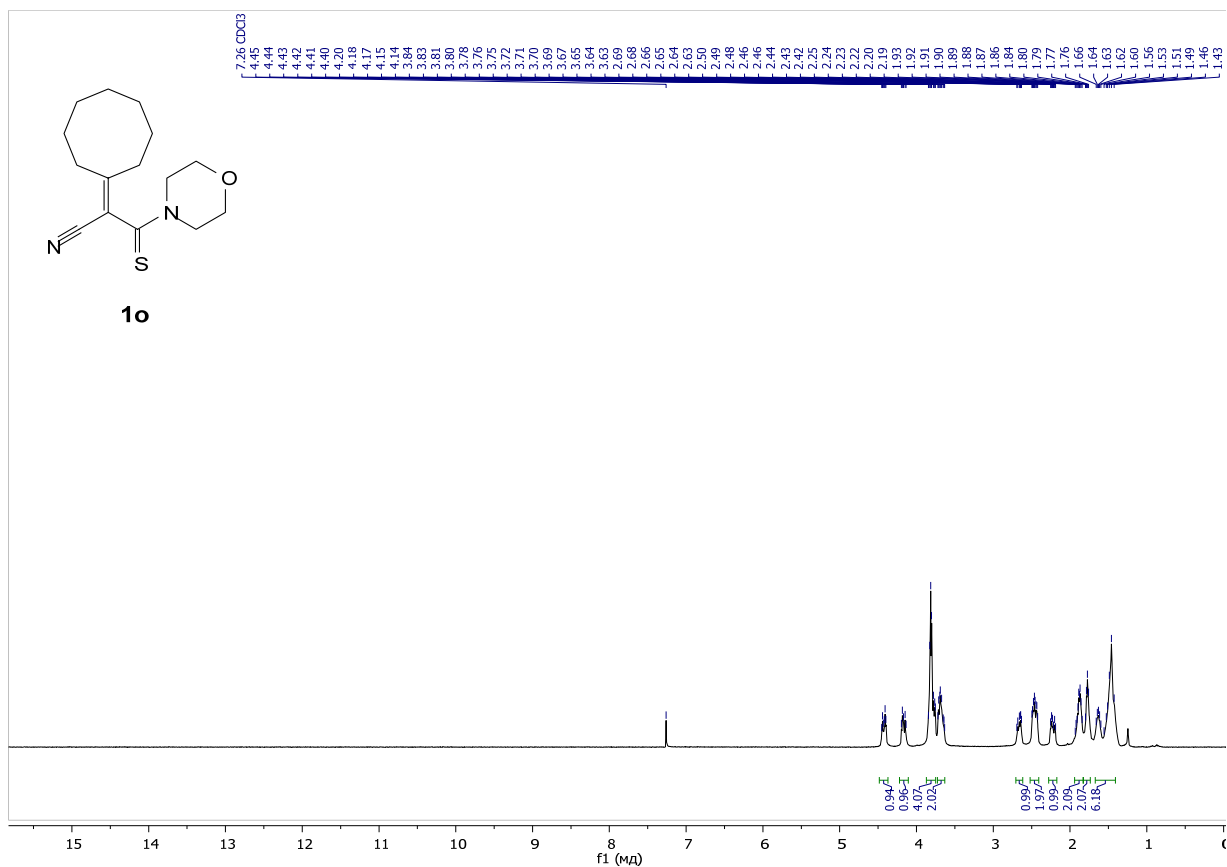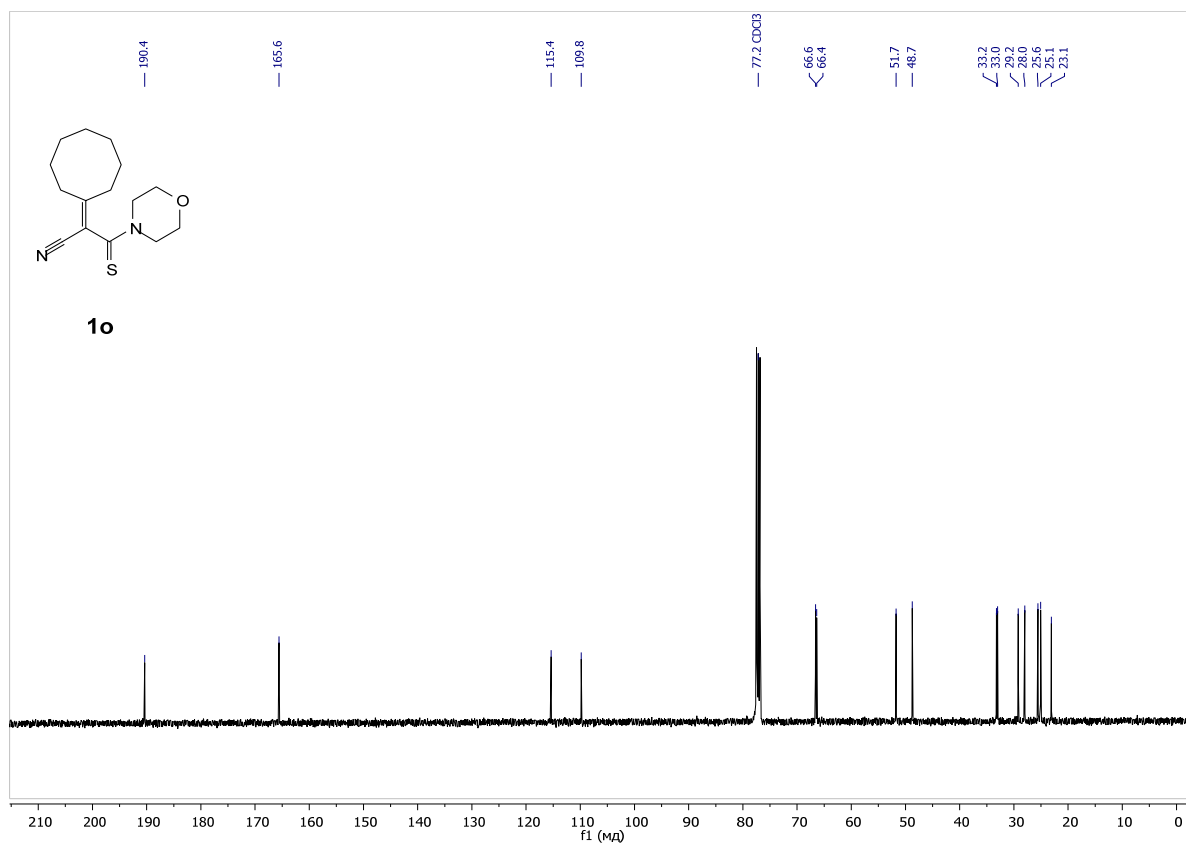



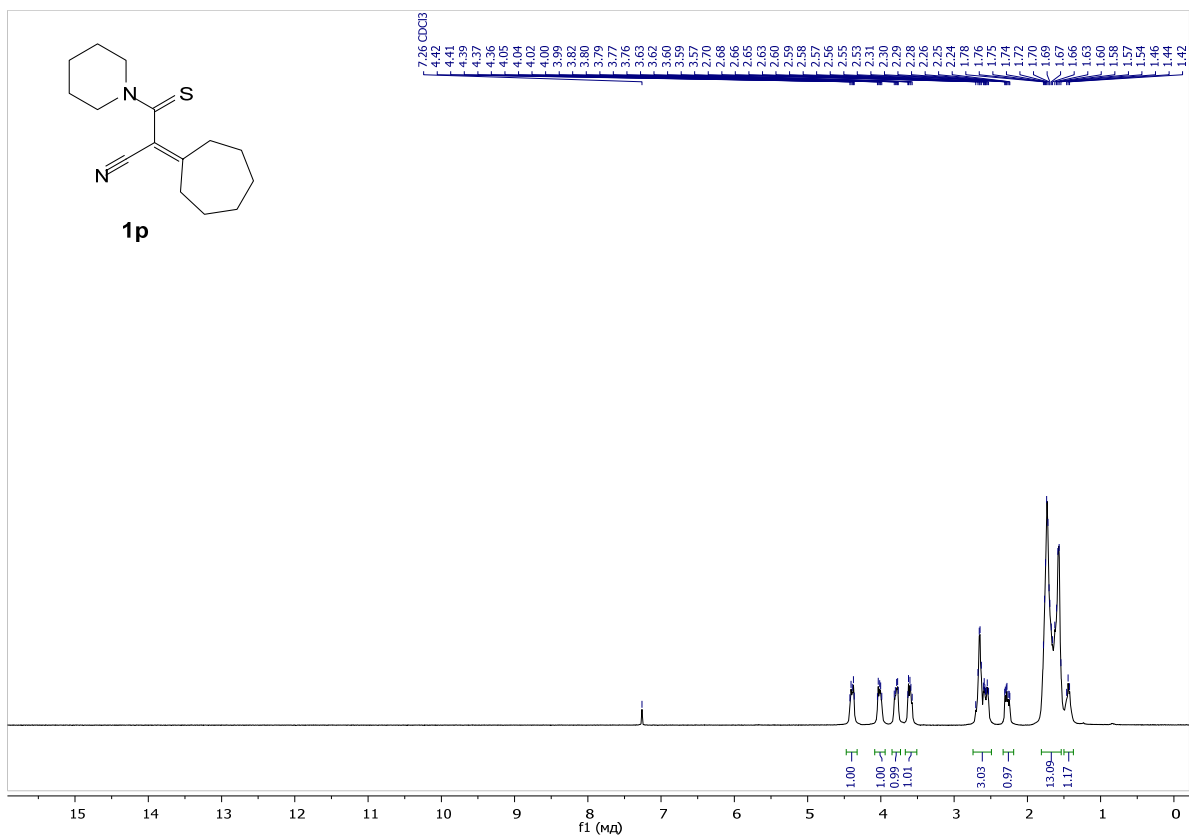

<sup>1</sup>H NMR (400 MHz, CDCl<sub>3</sub>-d) of **1p**

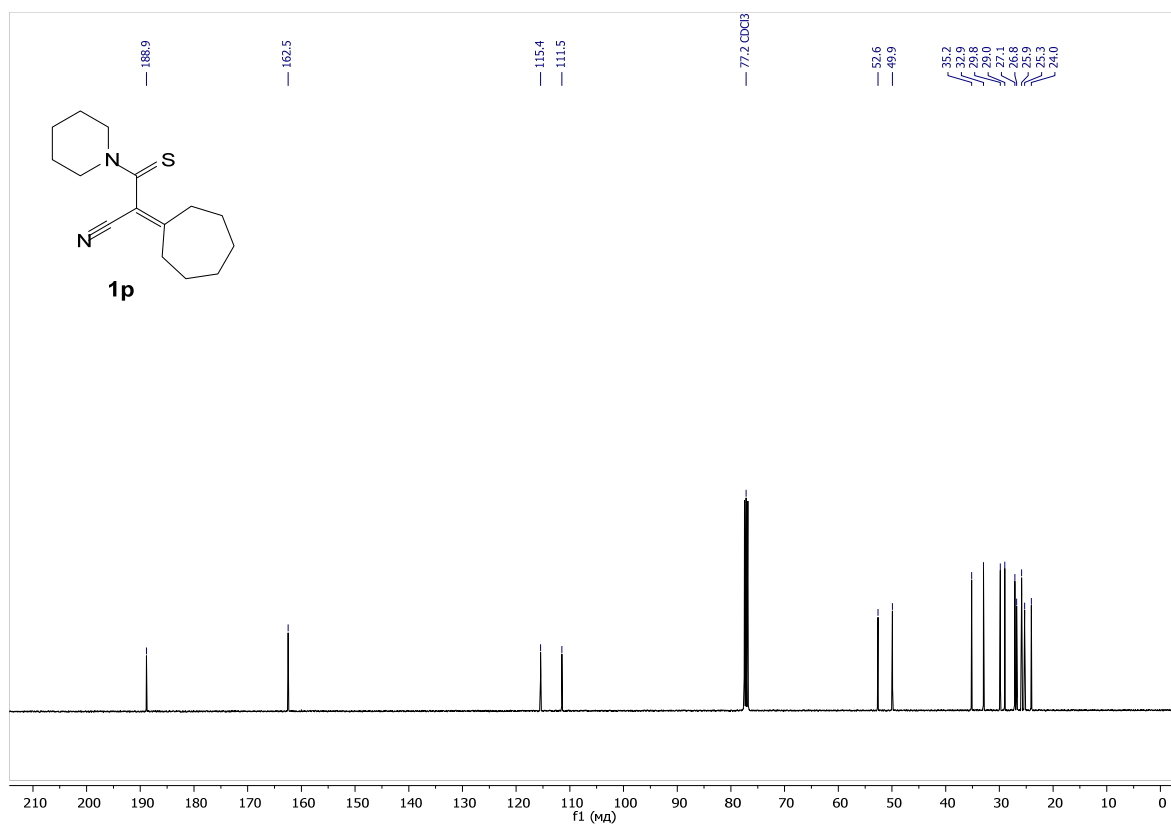

<sup>13</sup>C {<sup>1</sup>H} NMR (100 MHz, CDCl<sub>3</sub>-d) of **1p**

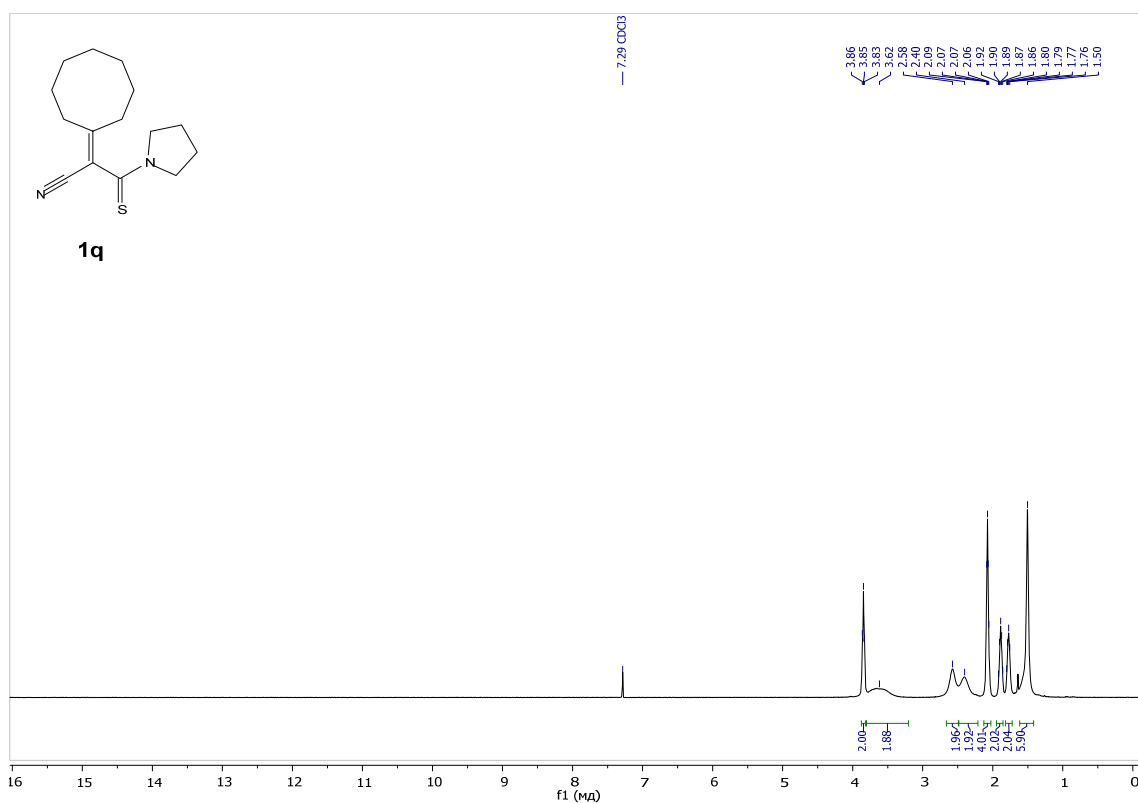

<sup>1</sup>H NMR (400 MHz, CDCl<sub>3</sub>-d) of **1q**

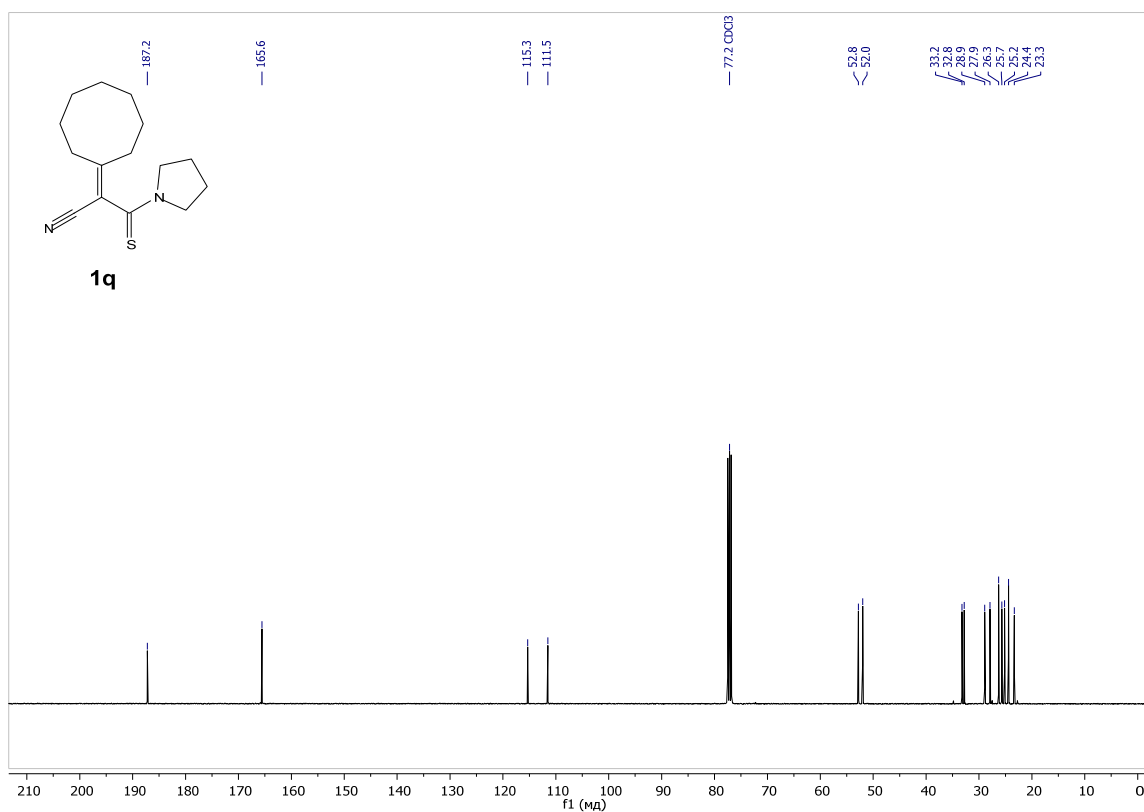

<sup>13</sup>C {<sup>1</sup>H} NMR (100 MHz, CDCl<sub>3</sub>-d) of **1q**

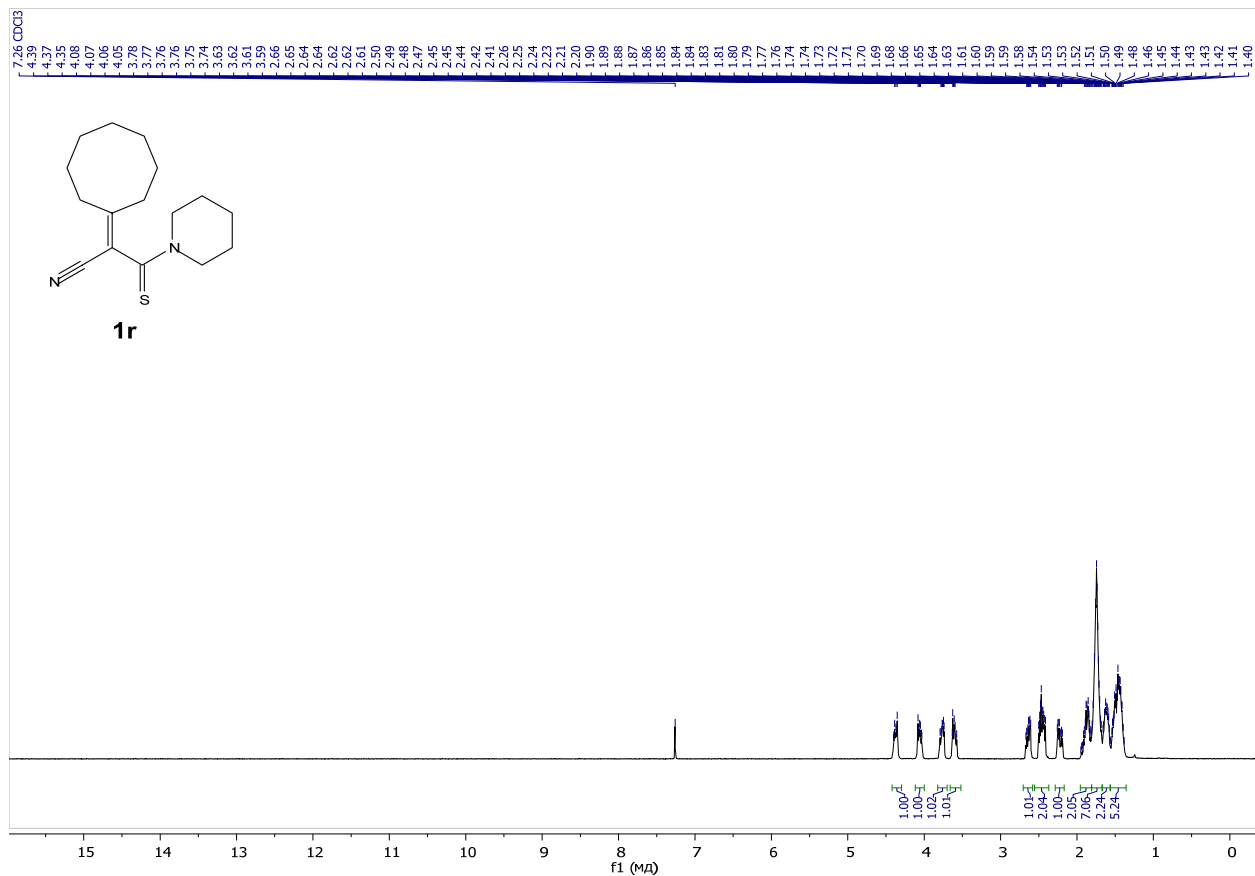

<sup>1</sup>H NMR (400 MHz, CDCl<sub>3</sub>-d) of **1r**

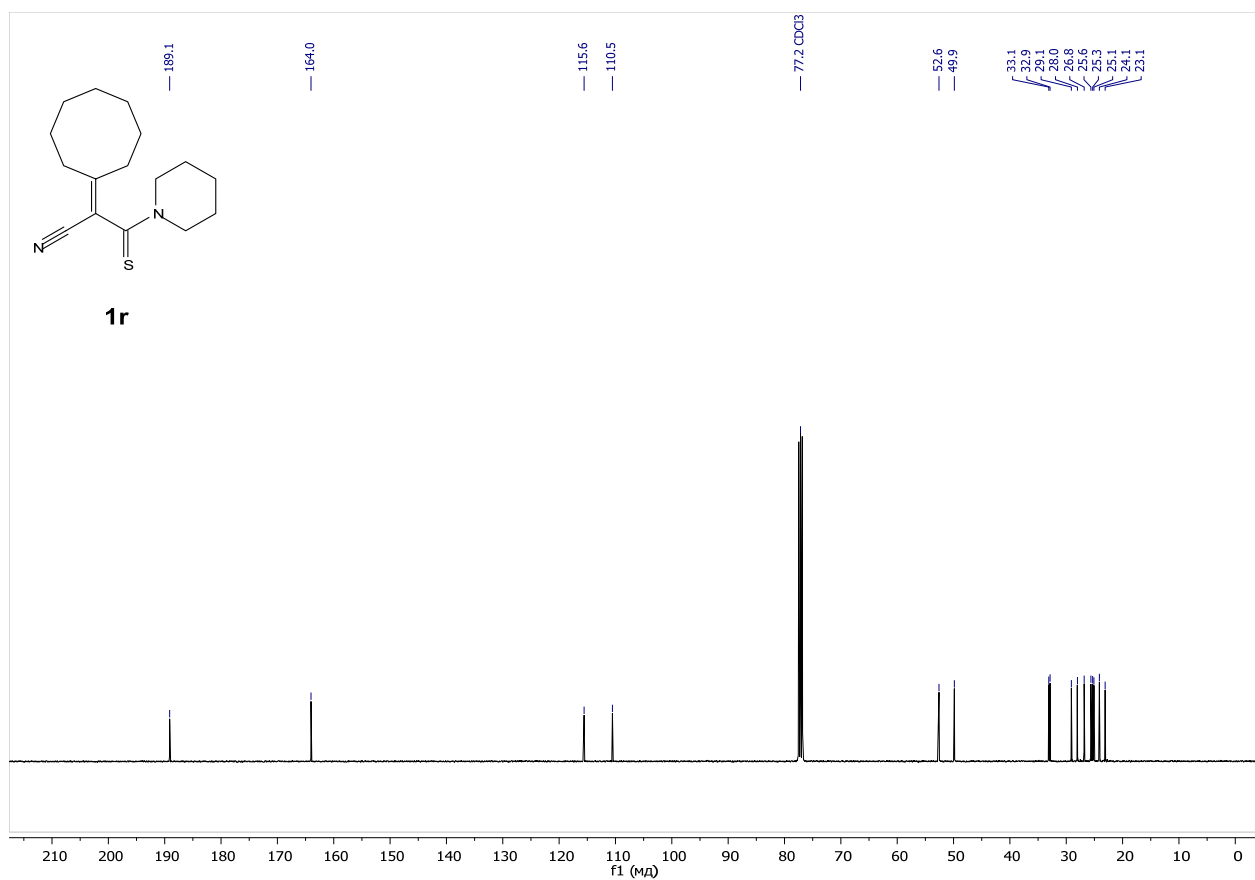

<sup>13</sup>C{<sup>1</sup>H} NMR (100 MHz, CDCl<sub>3</sub>-d) of **1r**

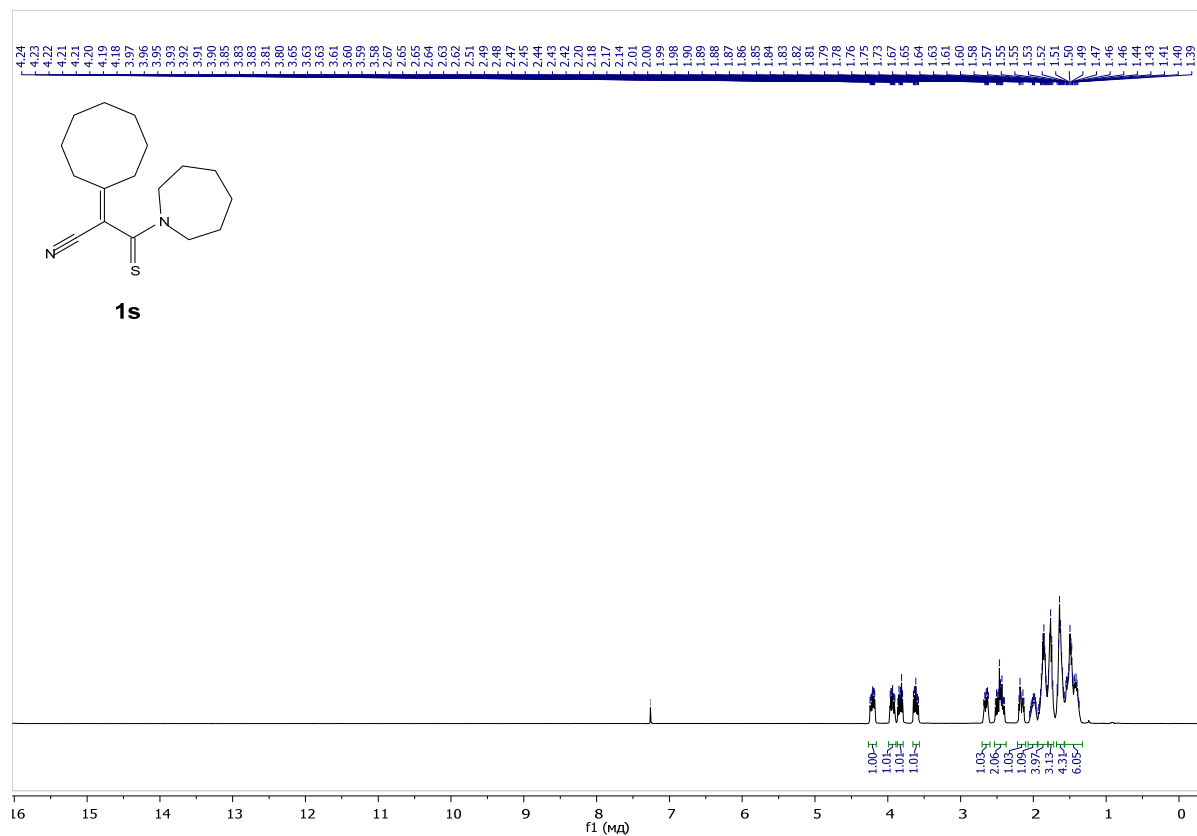

<sup>1</sup>H NMR (400 MHz, CDCl<sub>3</sub>-d) of **1s**

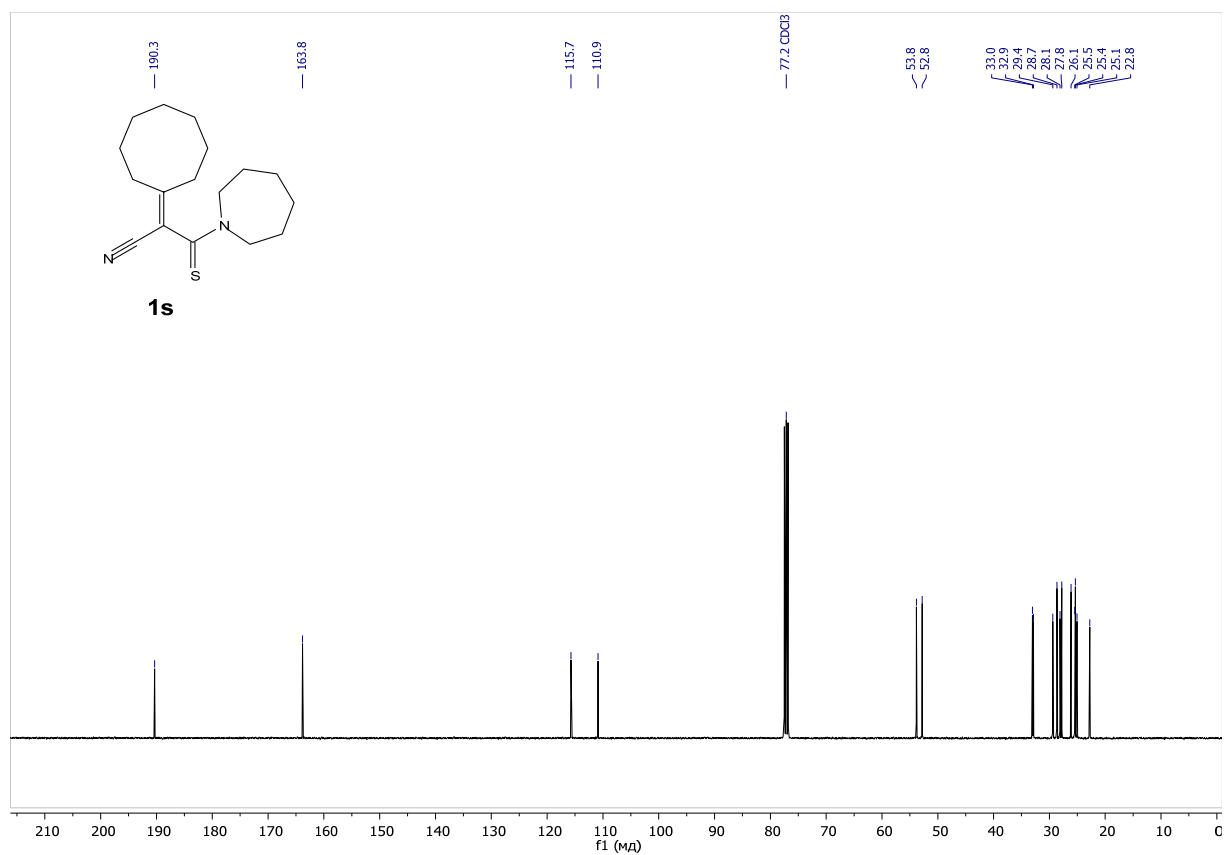

<sup>13</sup>C{<sup>1</sup>H} NMR (100 MHz, CDCl<sub>3</sub>-d) of **1s**

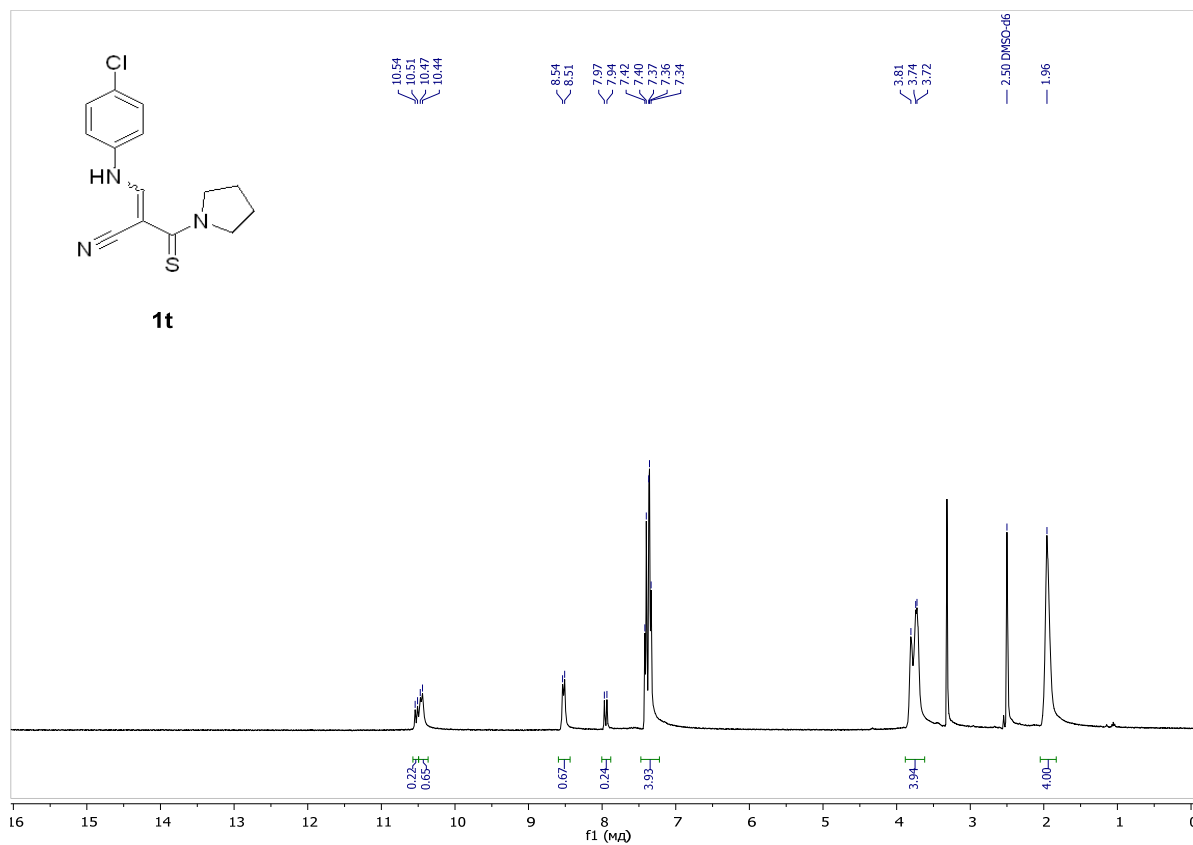

<sup>1</sup>H NMR (400 MHz, DMSO-*d*<sub>6</sub>) of **1t**

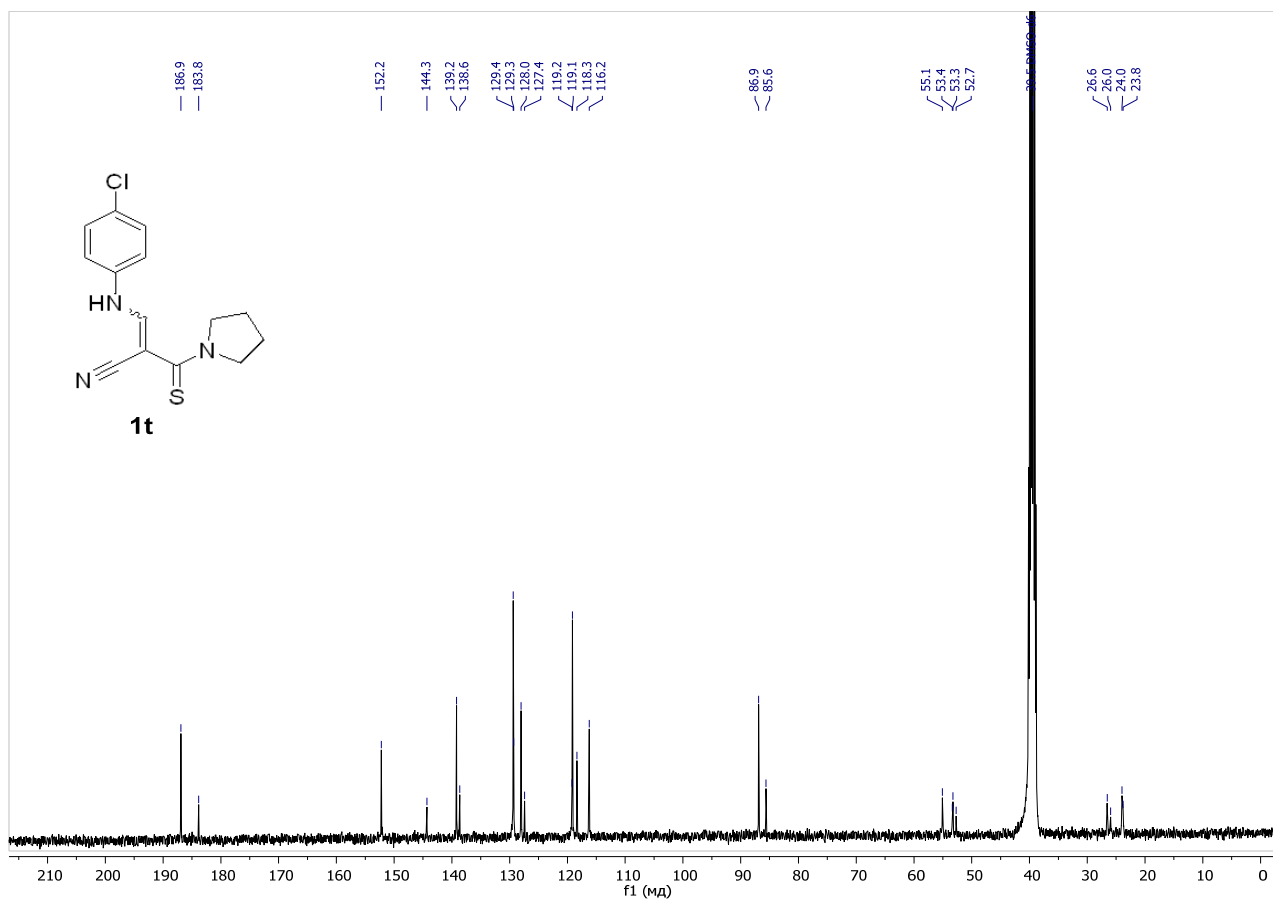

<sup>13</sup>C{<sup>1</sup>H} NMR (100 MHz, DMSO-*d*<sub>6</sub>) of **1t**

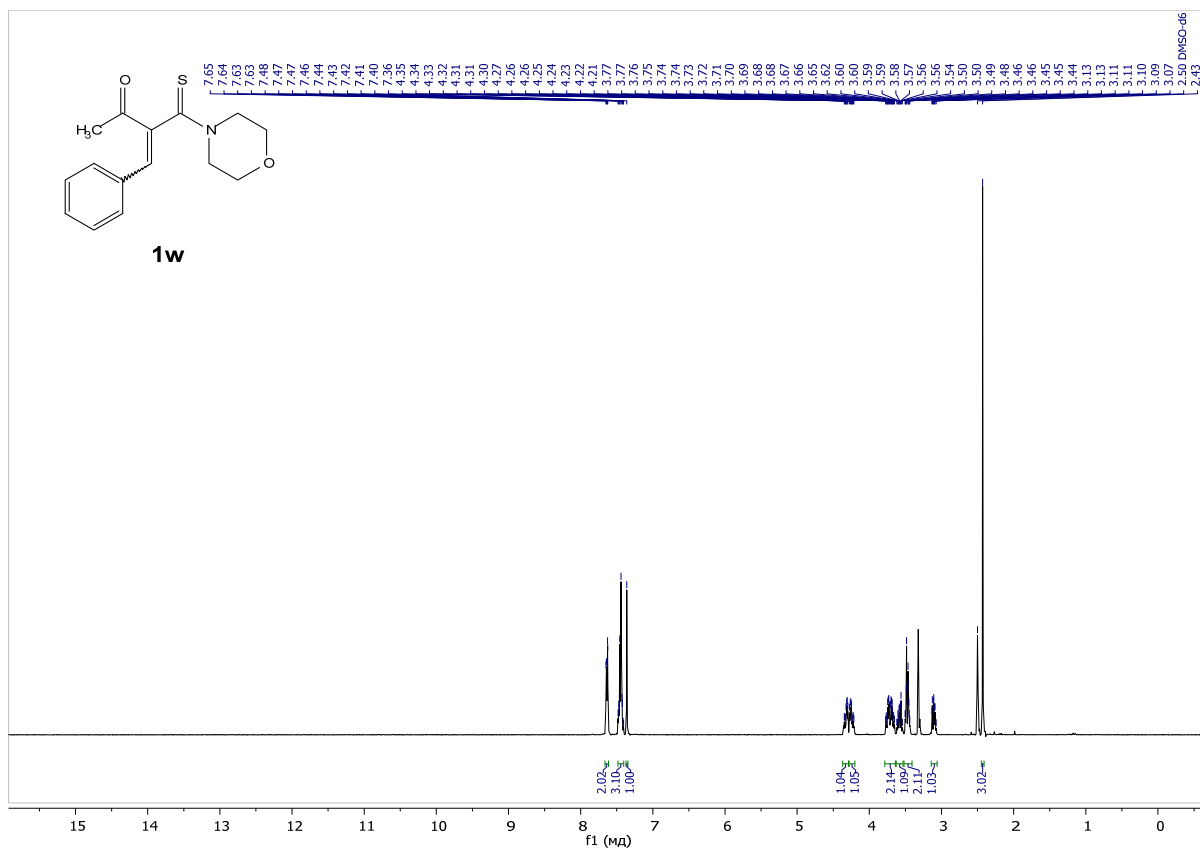

<sup>1</sup>H NMR (400 MHz, DMSO-*d*<sub>6</sub>) of **1w**

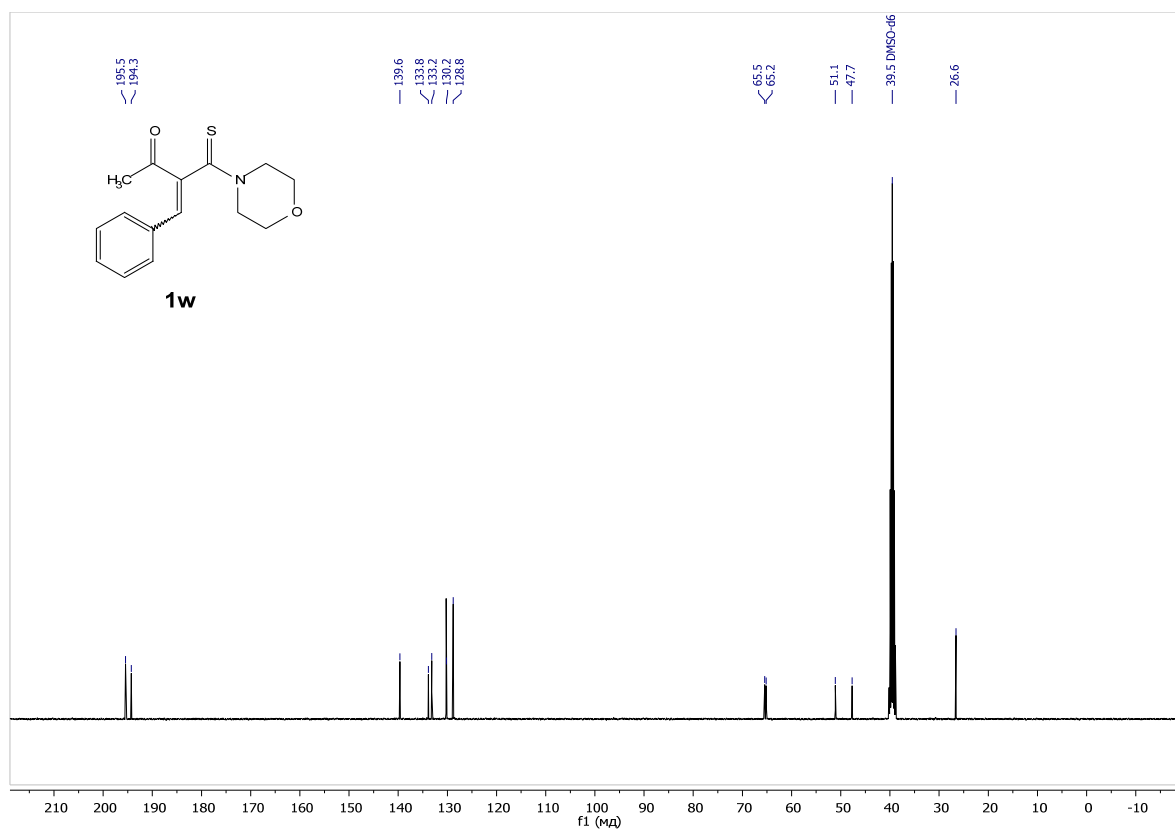

<sup>13</sup>C {<sup>1</sup>H} NMR (100 MHz, DMSO-*d*<sub>6</sub>) of **1w**

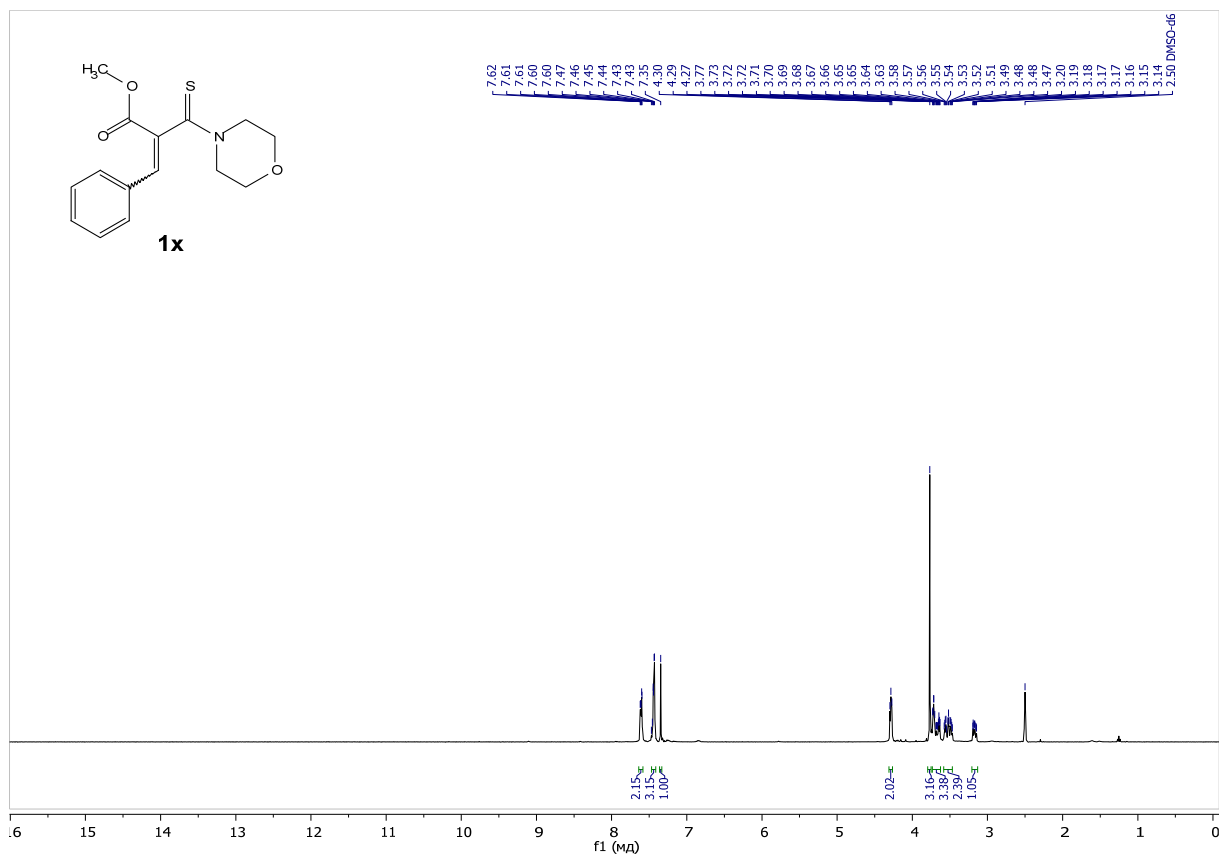

<sup>1</sup>H NMR (400 MHz, DMSO-*d*<sub>6</sub>) of **1x**

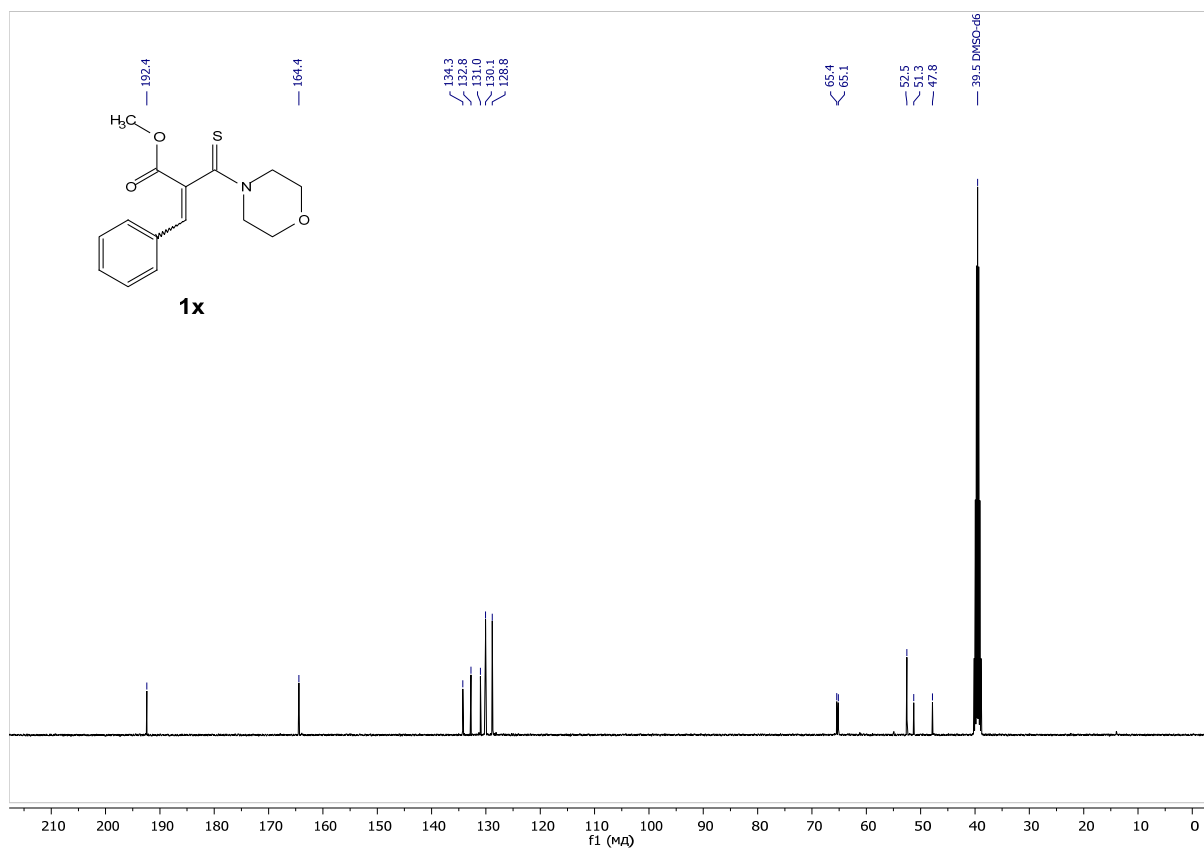

<sup>13</sup>C{<sup>1</sup>H} NMR (100 MHz, DMSO-*d*<sub>6</sub>) of **1x**

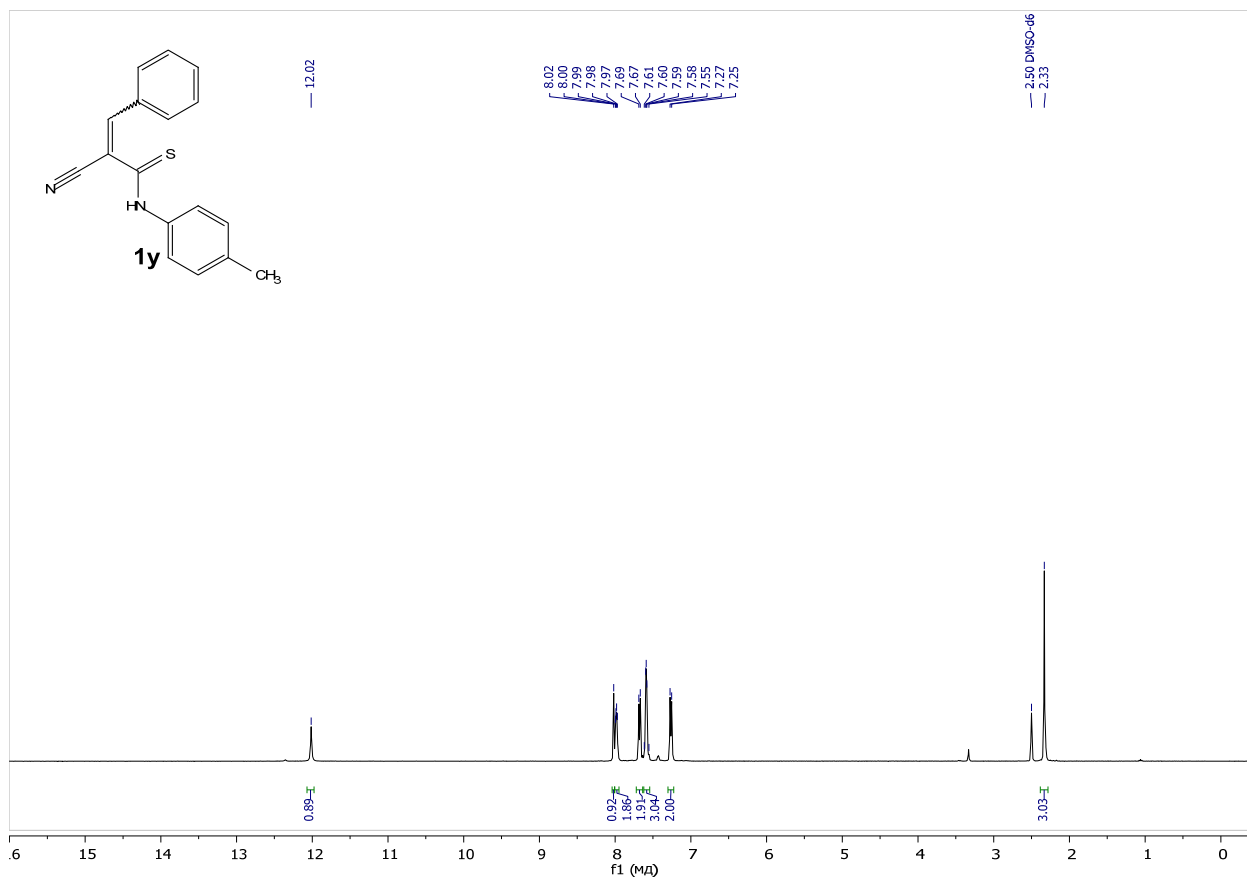

$^1\text{H}$  NMR (400 MHz,  $\text{DMSO-}d_6$ ) of **1y**

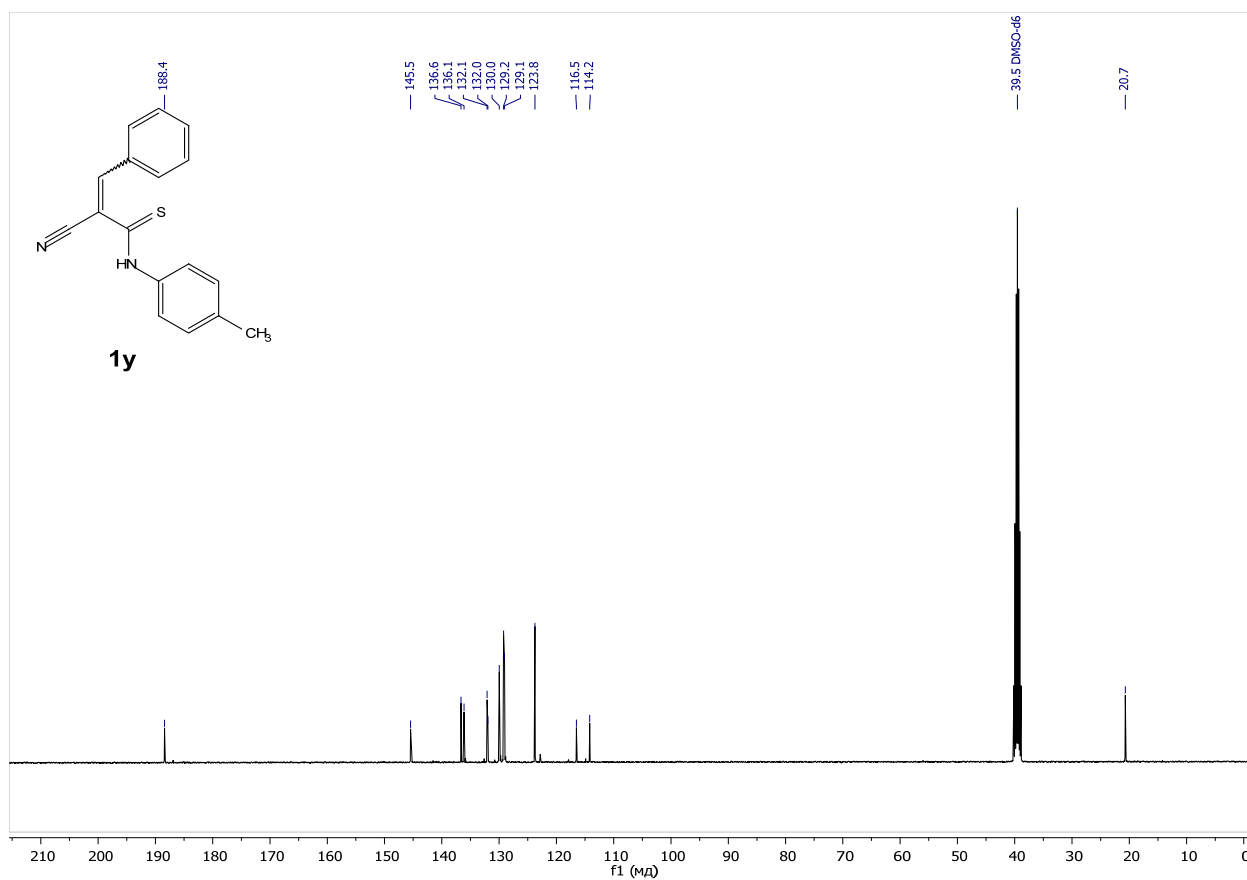

$^{13}\text{C}$  { $^1\text{H}$ } NMR (100 MHz,  $\text{DMSO-}d_6$ ) of **1y**



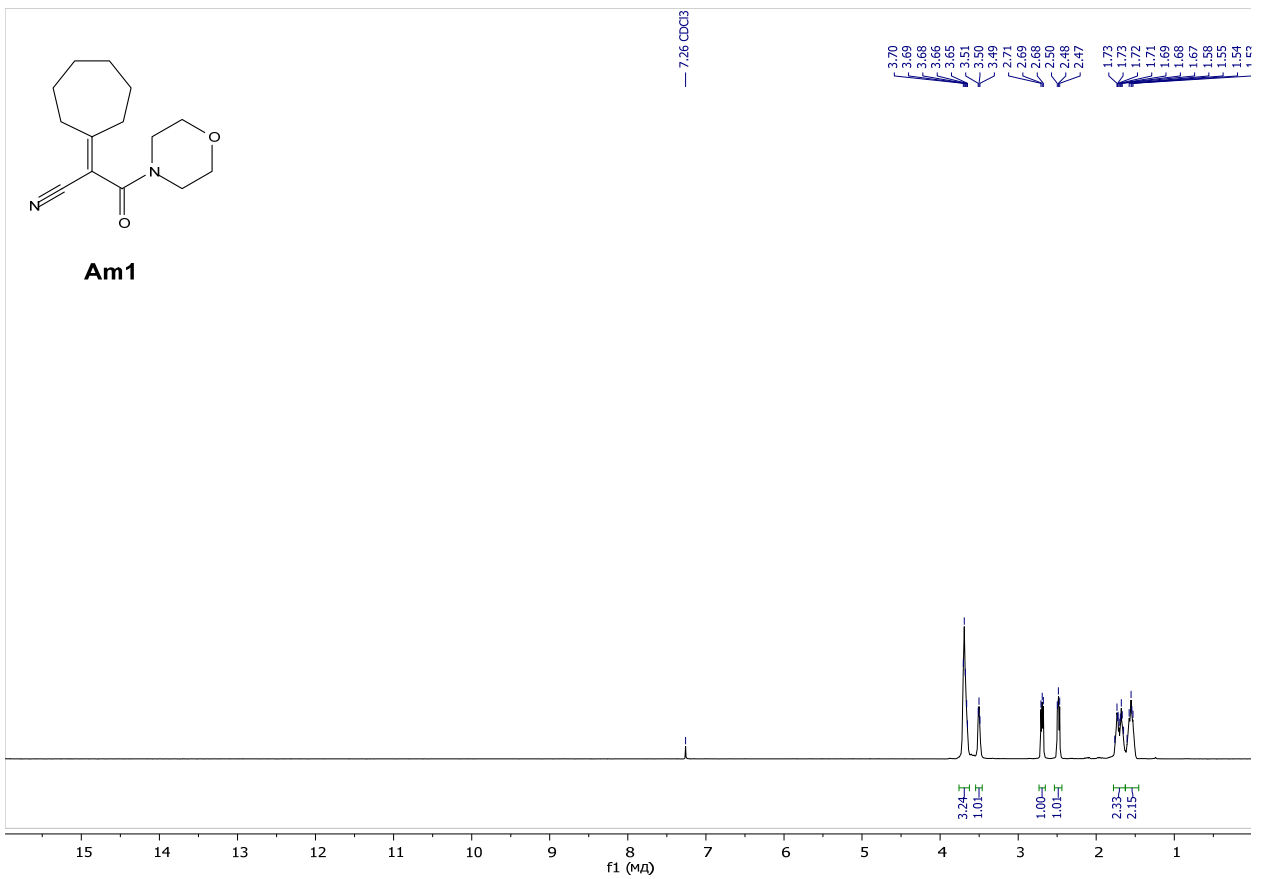

<sup>1</sup>H NMR (400 MHz, CDCl<sub>3</sub>-d) of **Am1**

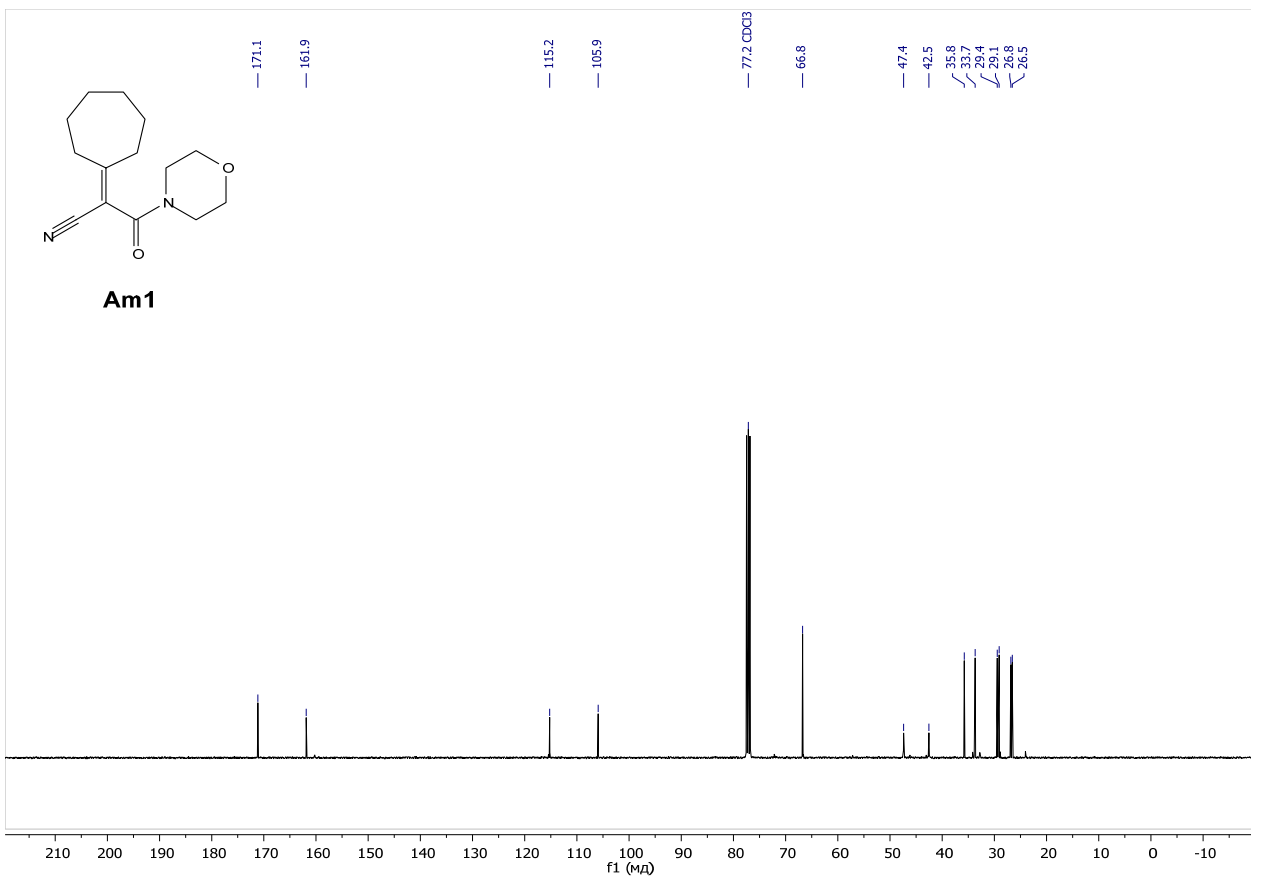

<sup>13</sup>C {<sup>1</sup>H} NMR (100 MHz, CDCl<sub>3</sub>-d) of **Am1**

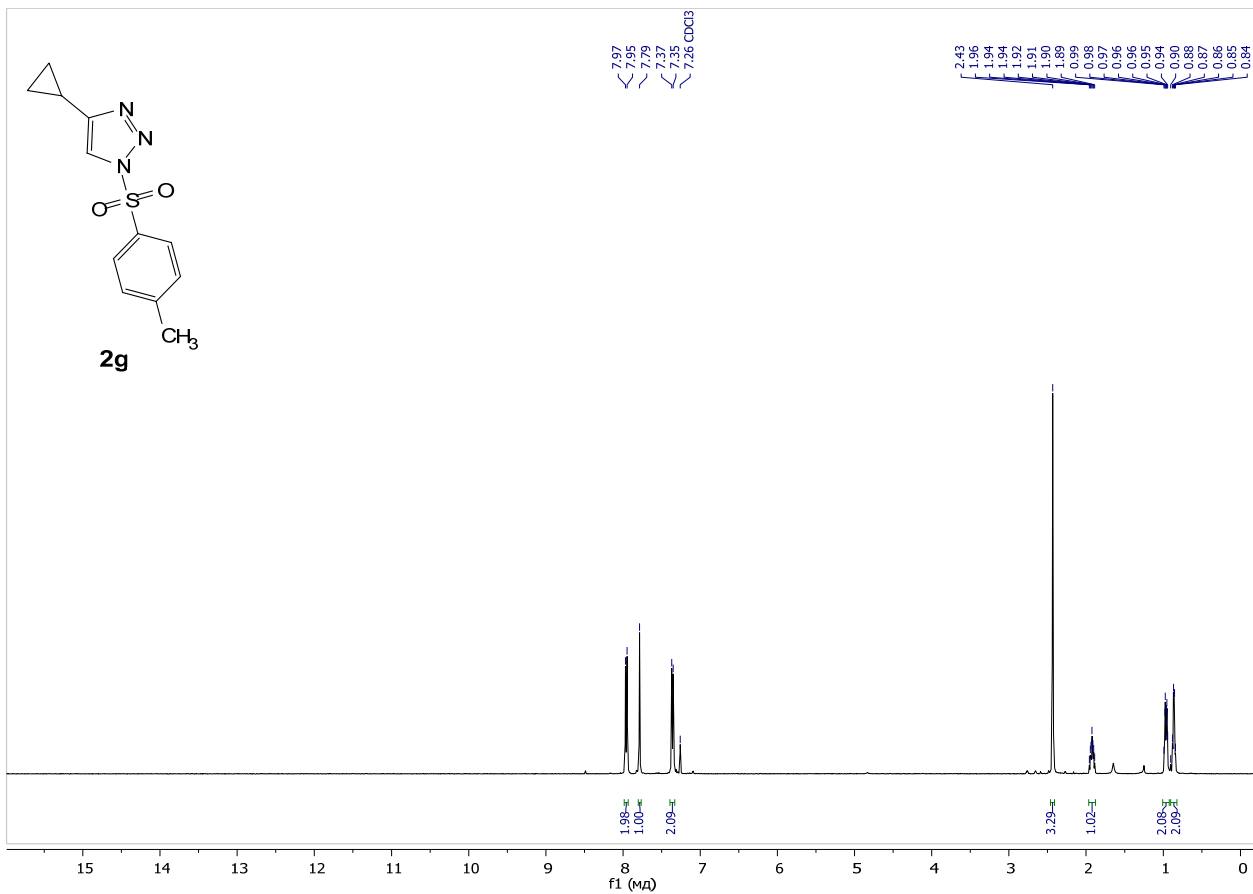

<sup>1</sup>H NMR (400 MHz, CDCl<sub>3</sub>-d) of **2g**

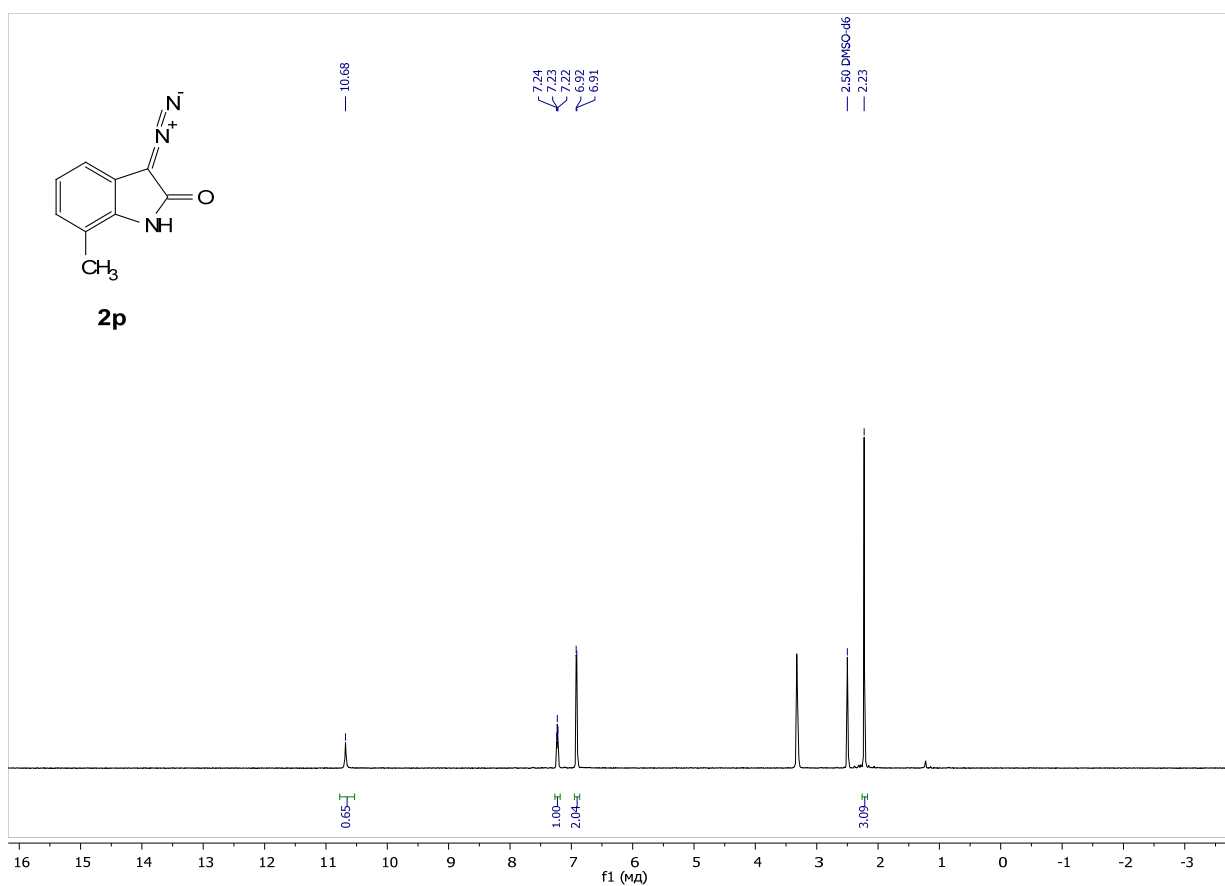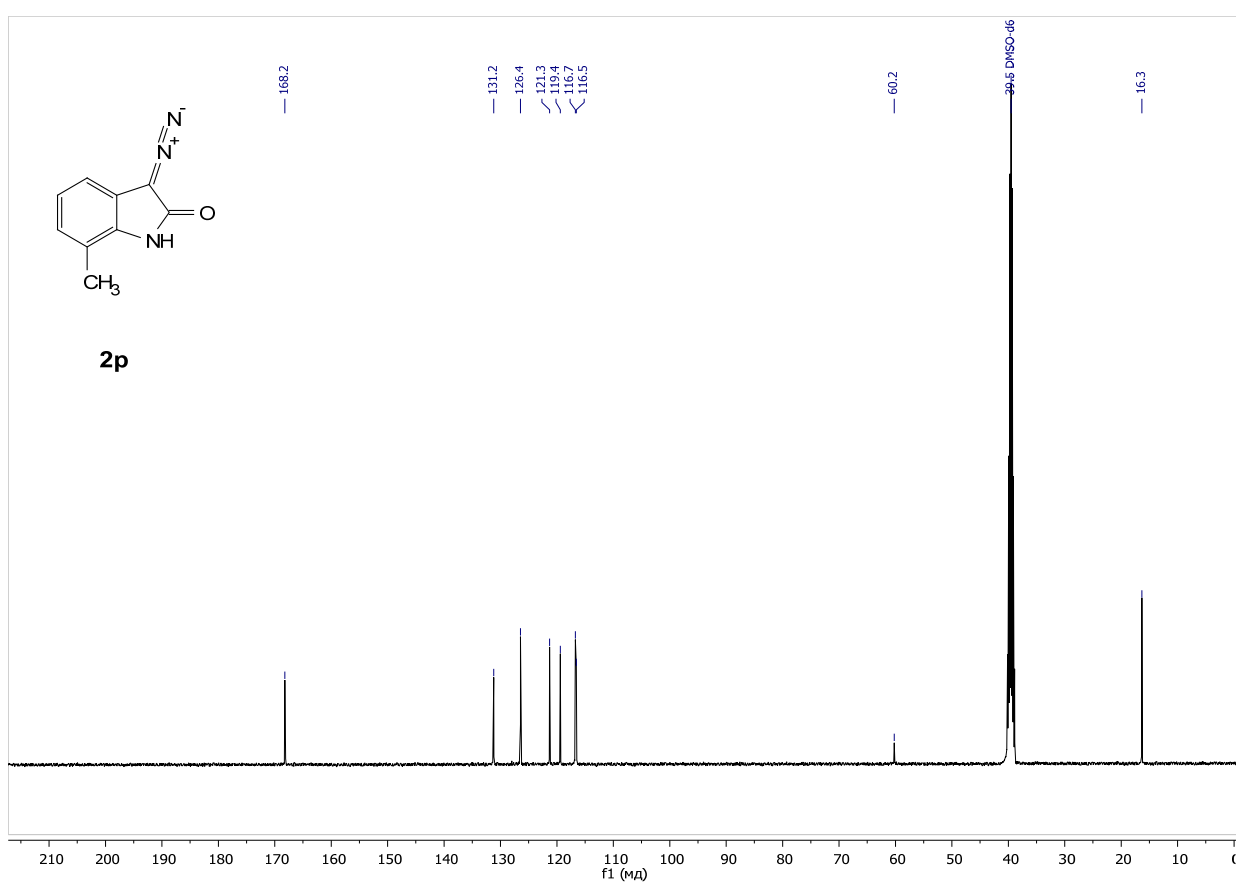

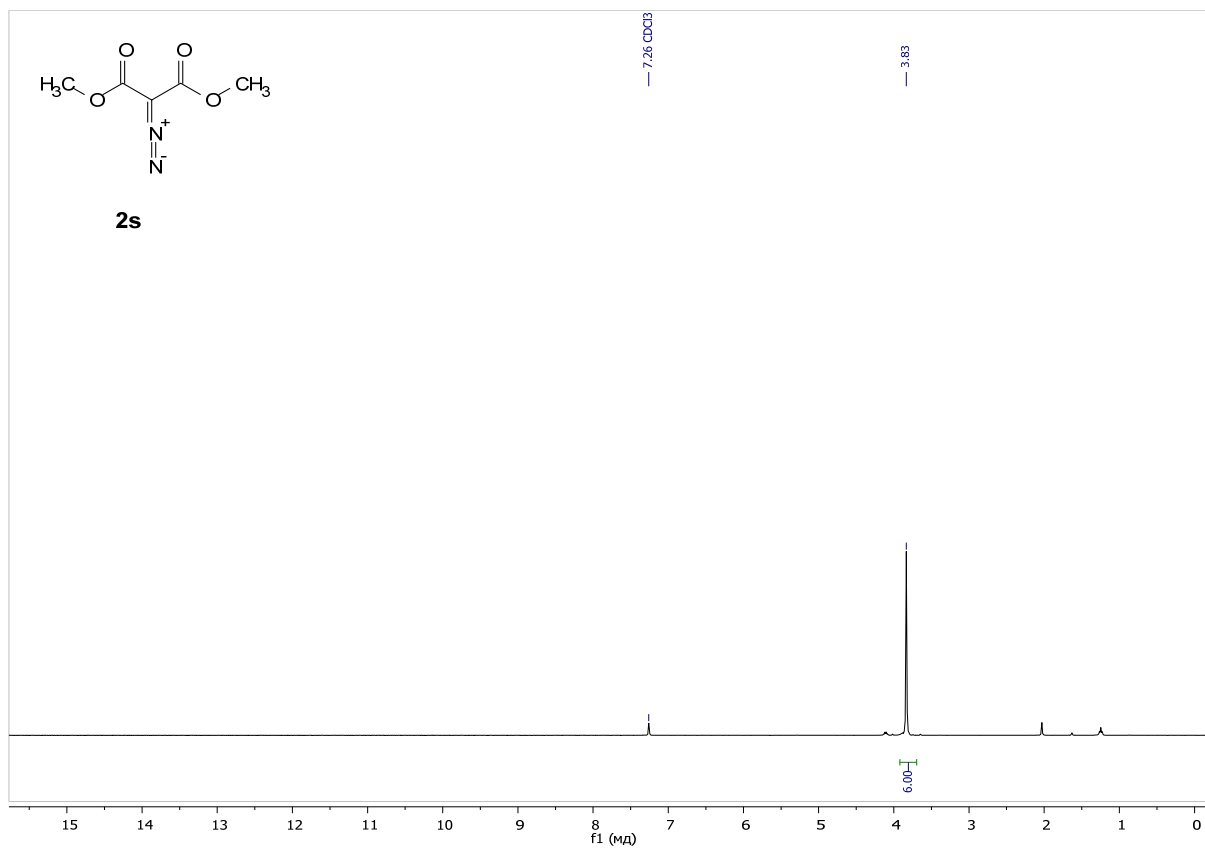

<sup>1</sup>H NMR (400 MHz, CDCl<sub>3</sub>-d) of **2s**

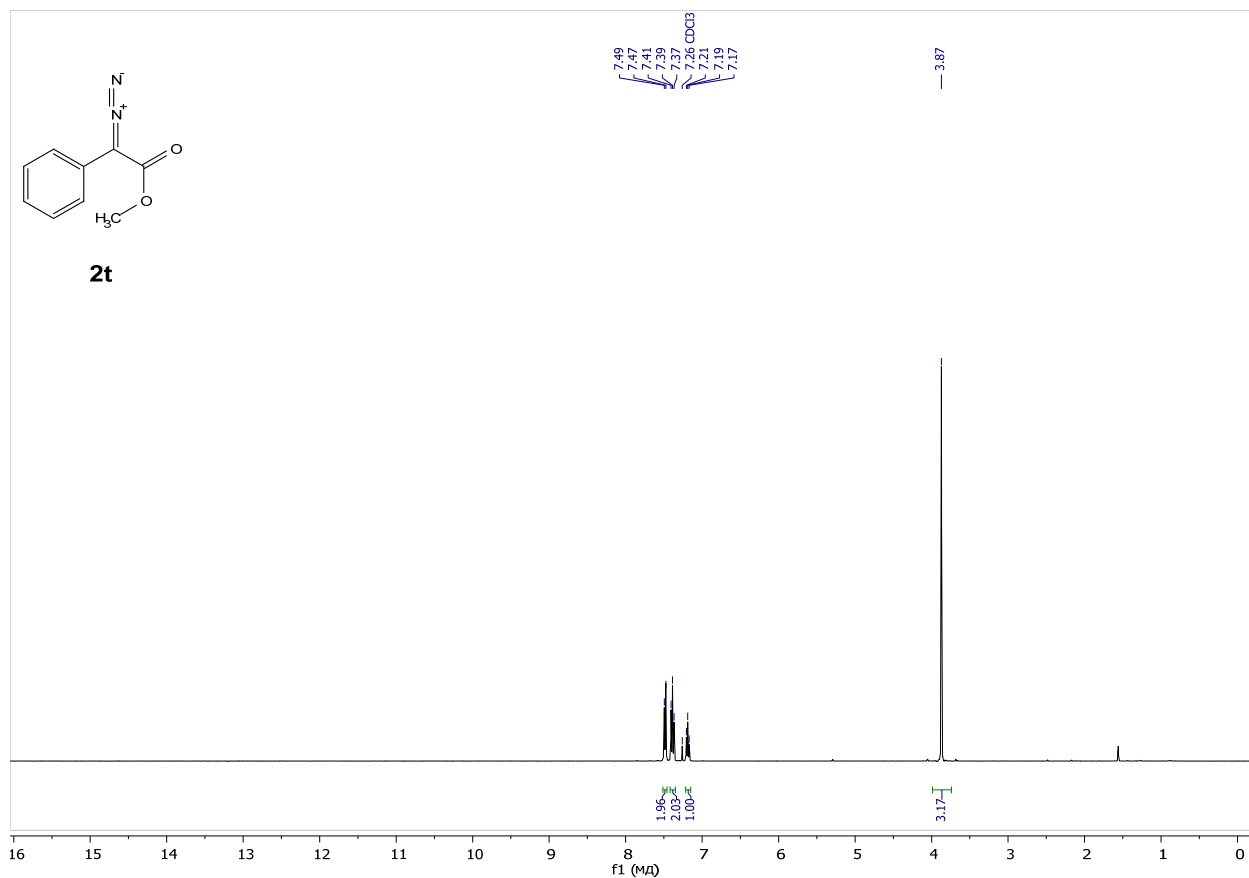

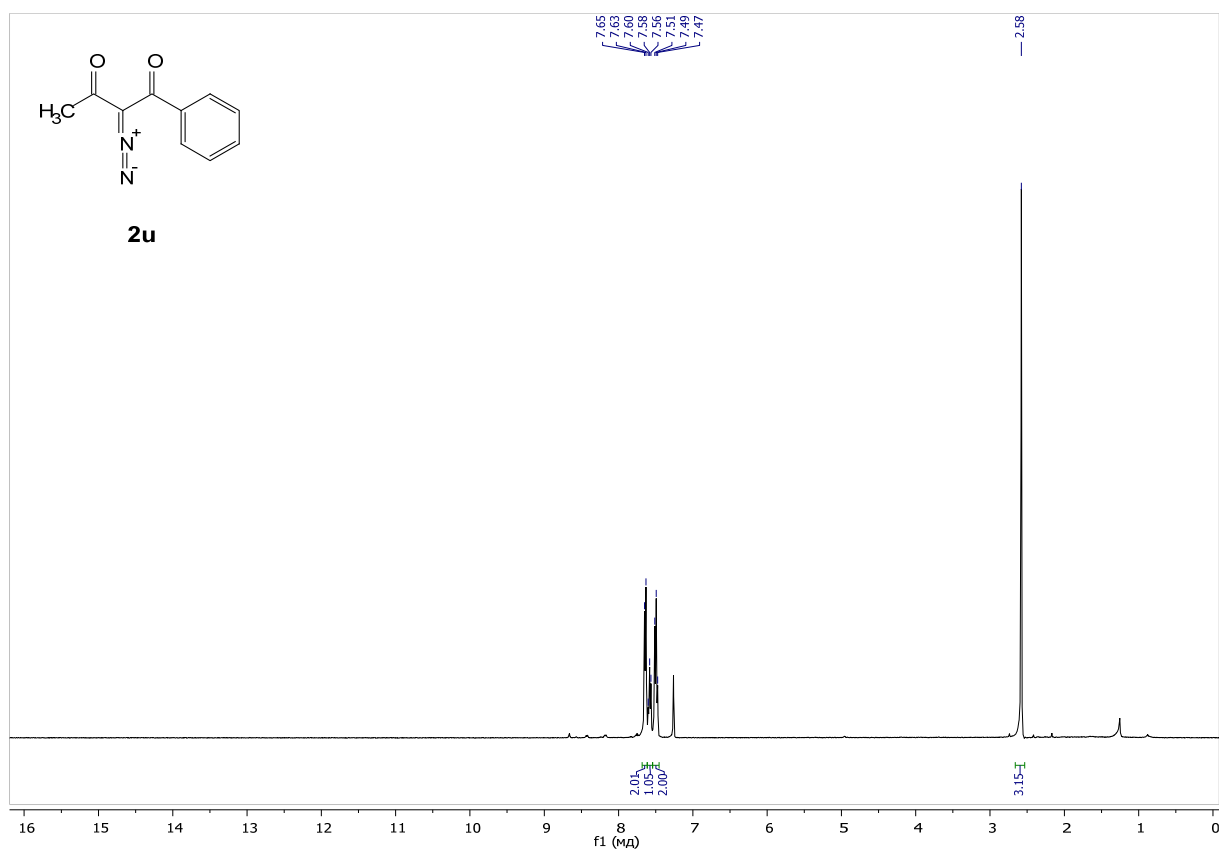

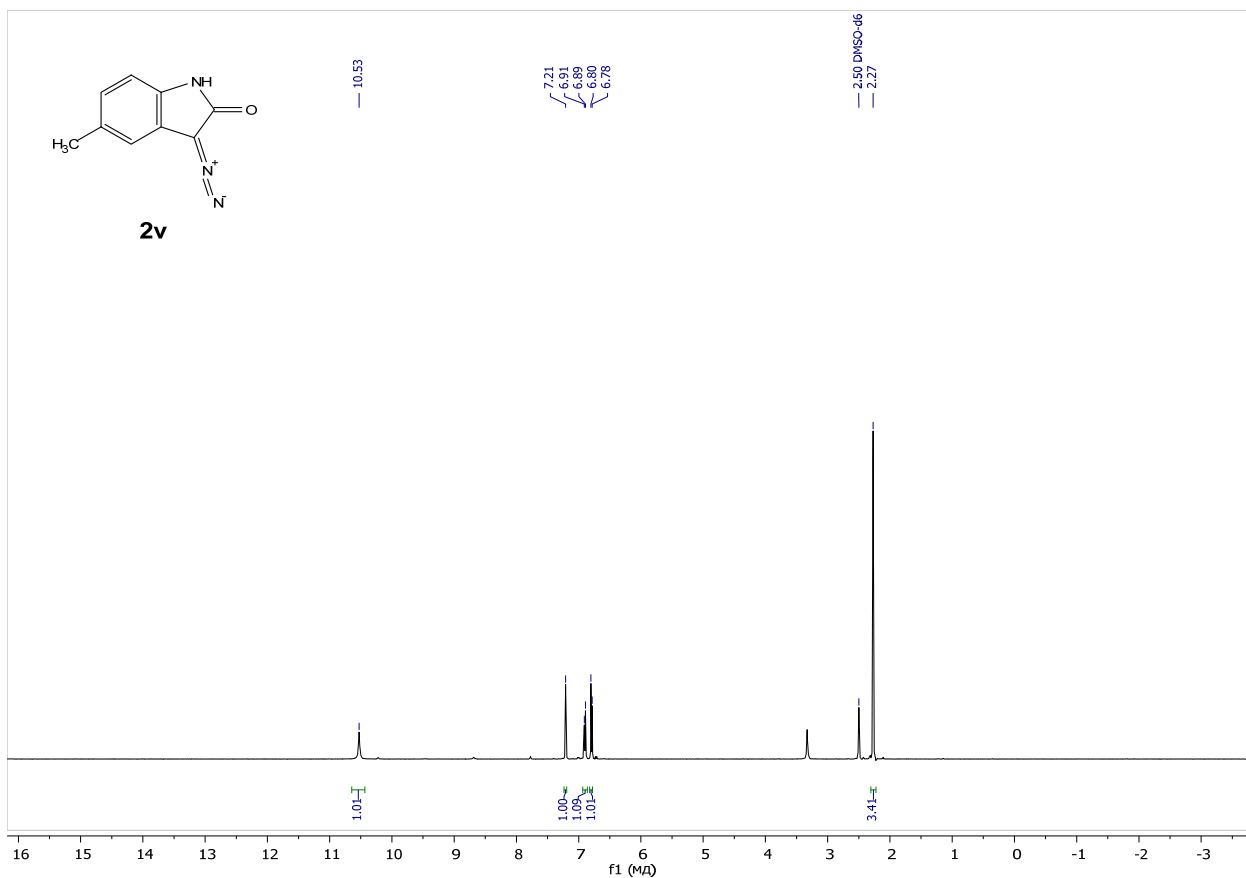

$^1\text{H}$  NMR (400 MHz,  $\text{DMSO-}d_6$ ) of **2v**

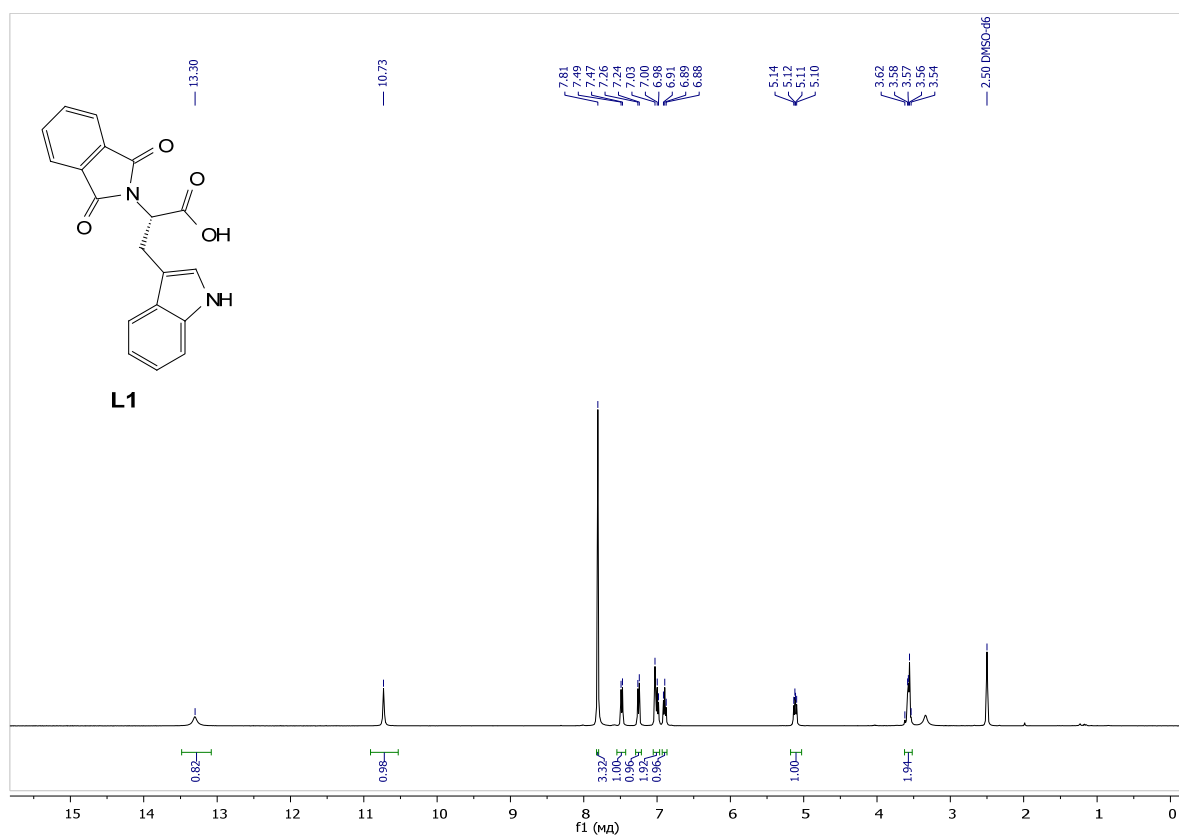



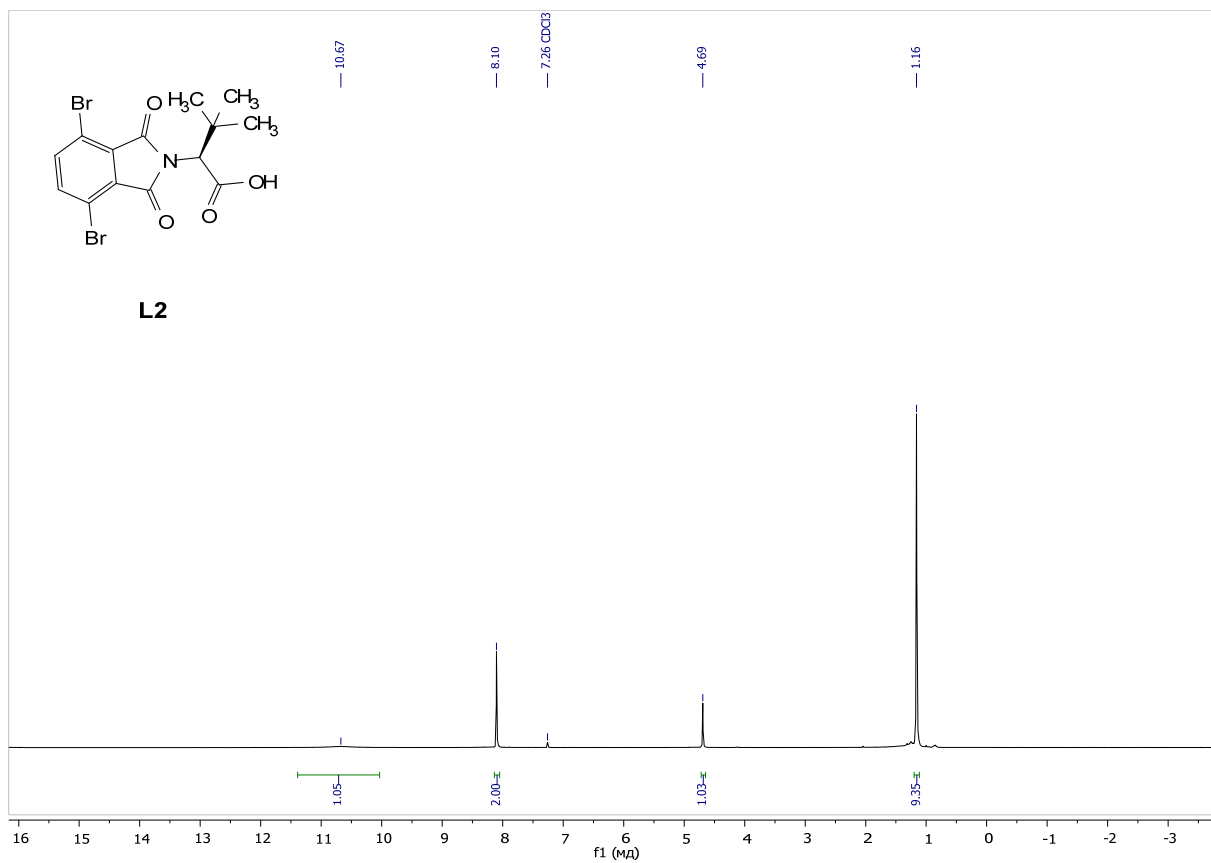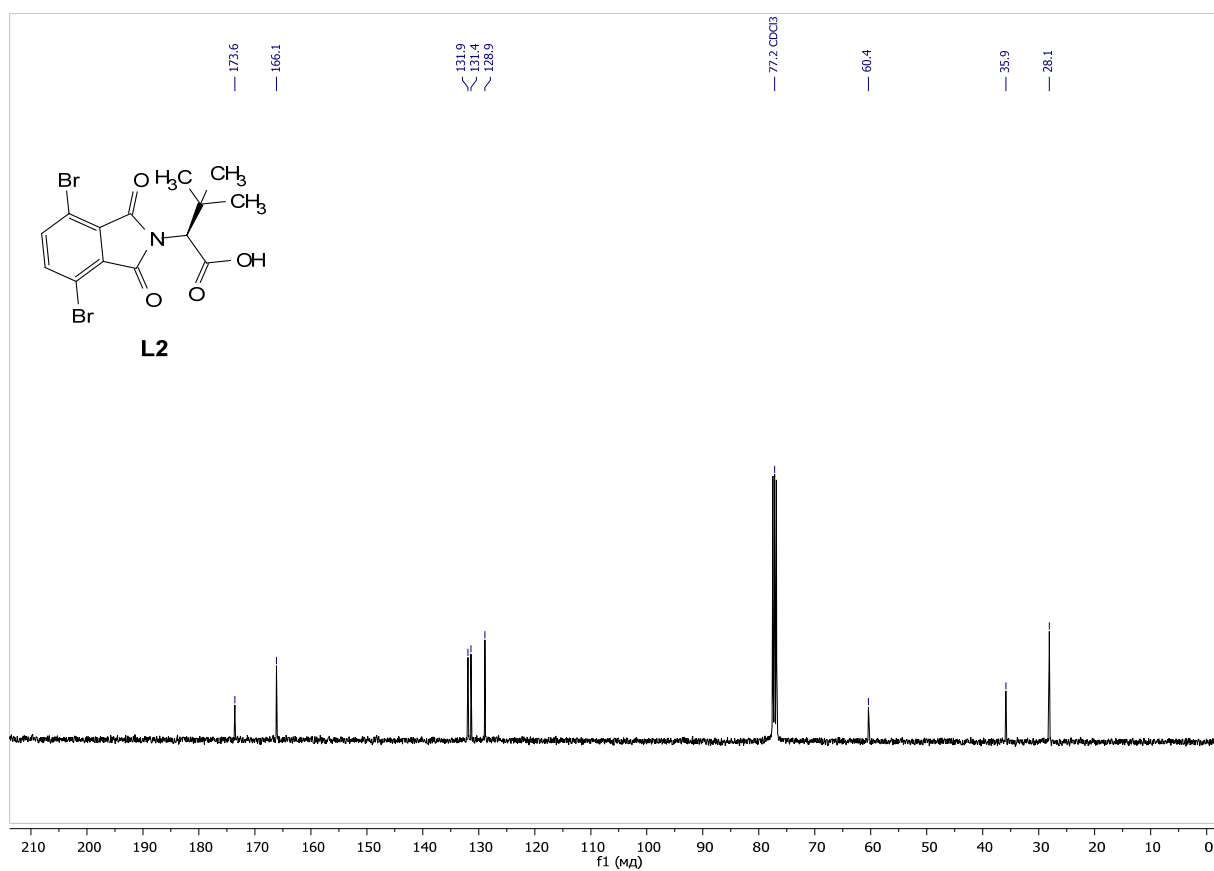

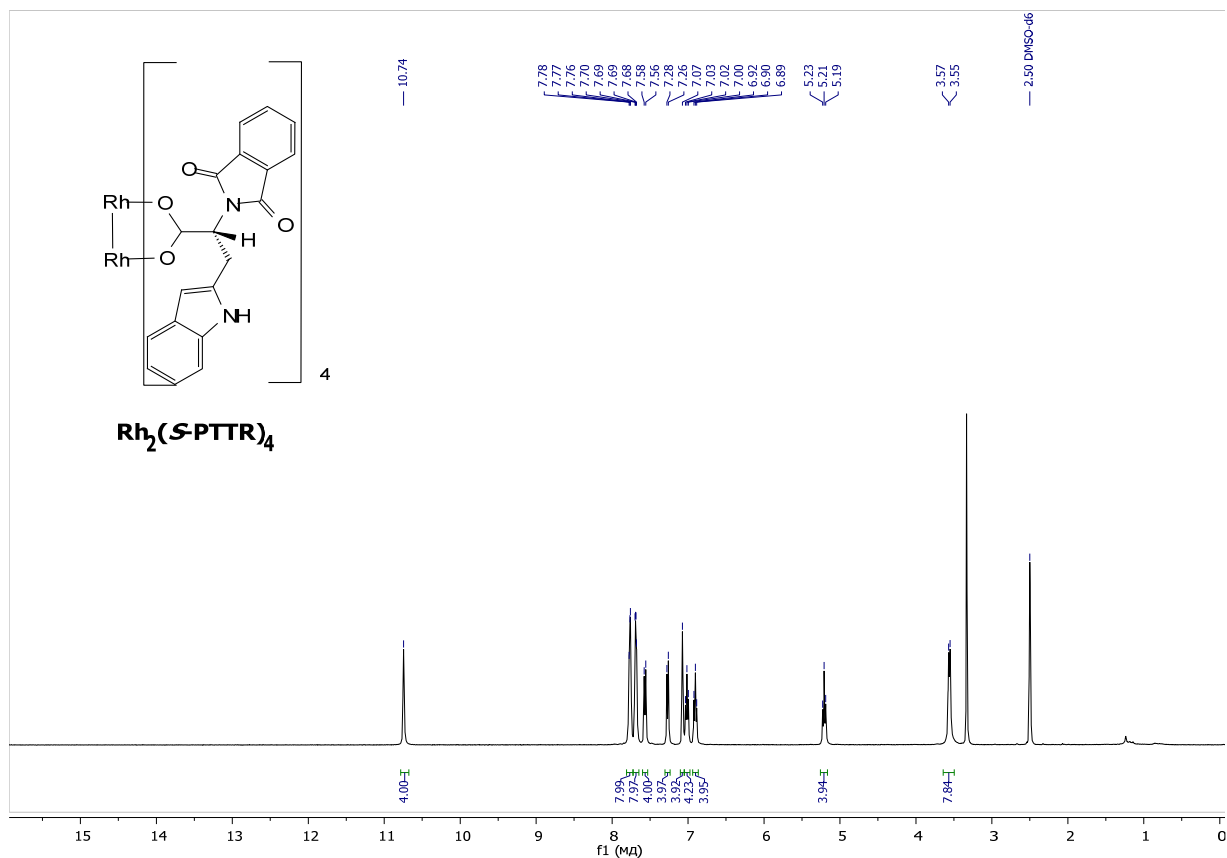

<sup>1</sup>H NMR (400 MHz, DMSO-*d*<sub>6</sub>) of Rh<sub>2</sub>(S-PTTR)<sub>4</sub>

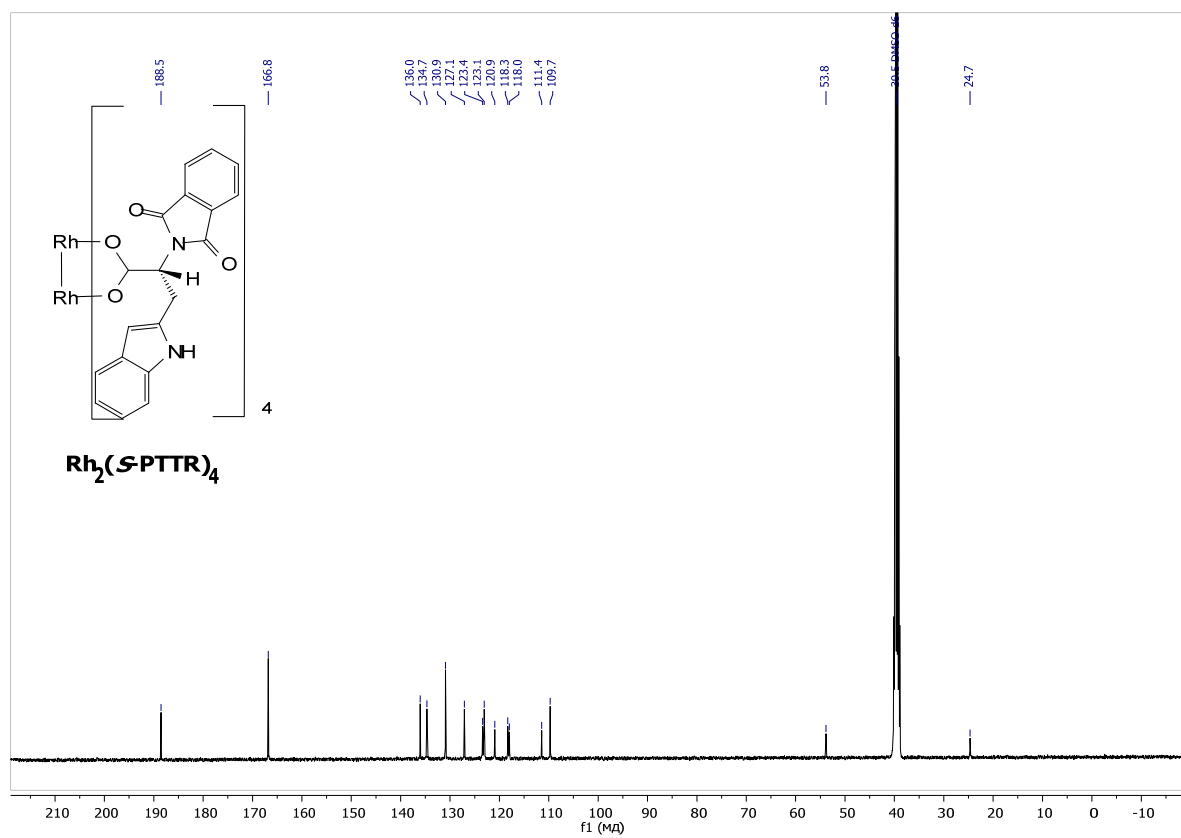

<sup>13</sup>C {<sup>1</sup>H} NMR (100 MHz, DMSO-*d*<sub>6</sub>) of Rh<sub>2</sub>(S-PTTR)<sub>4</sub>

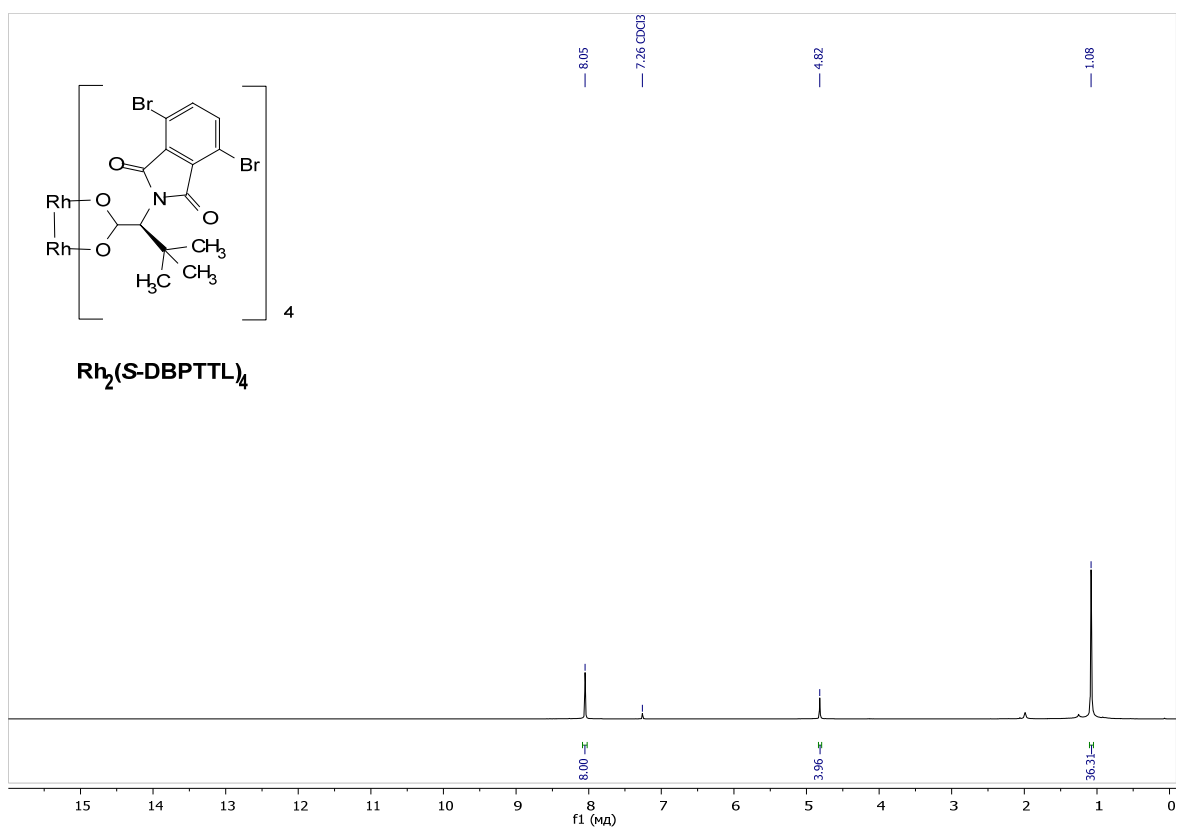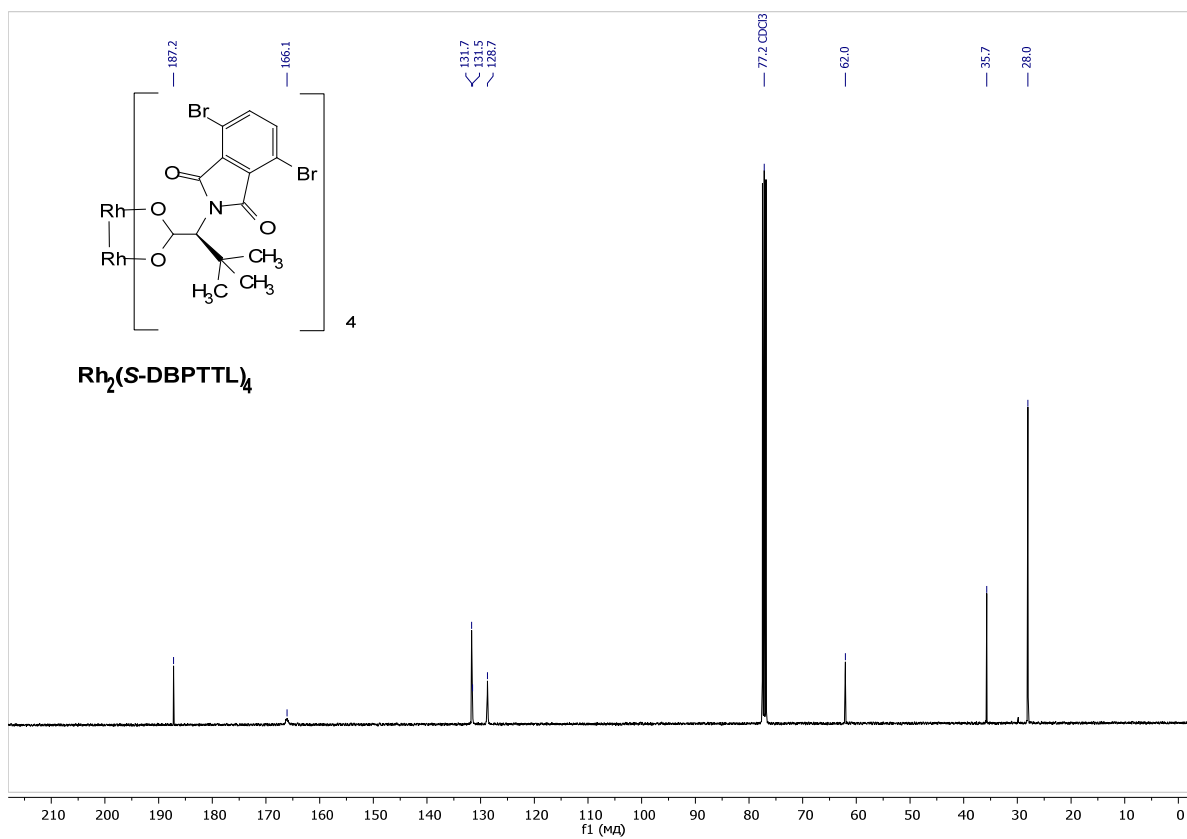

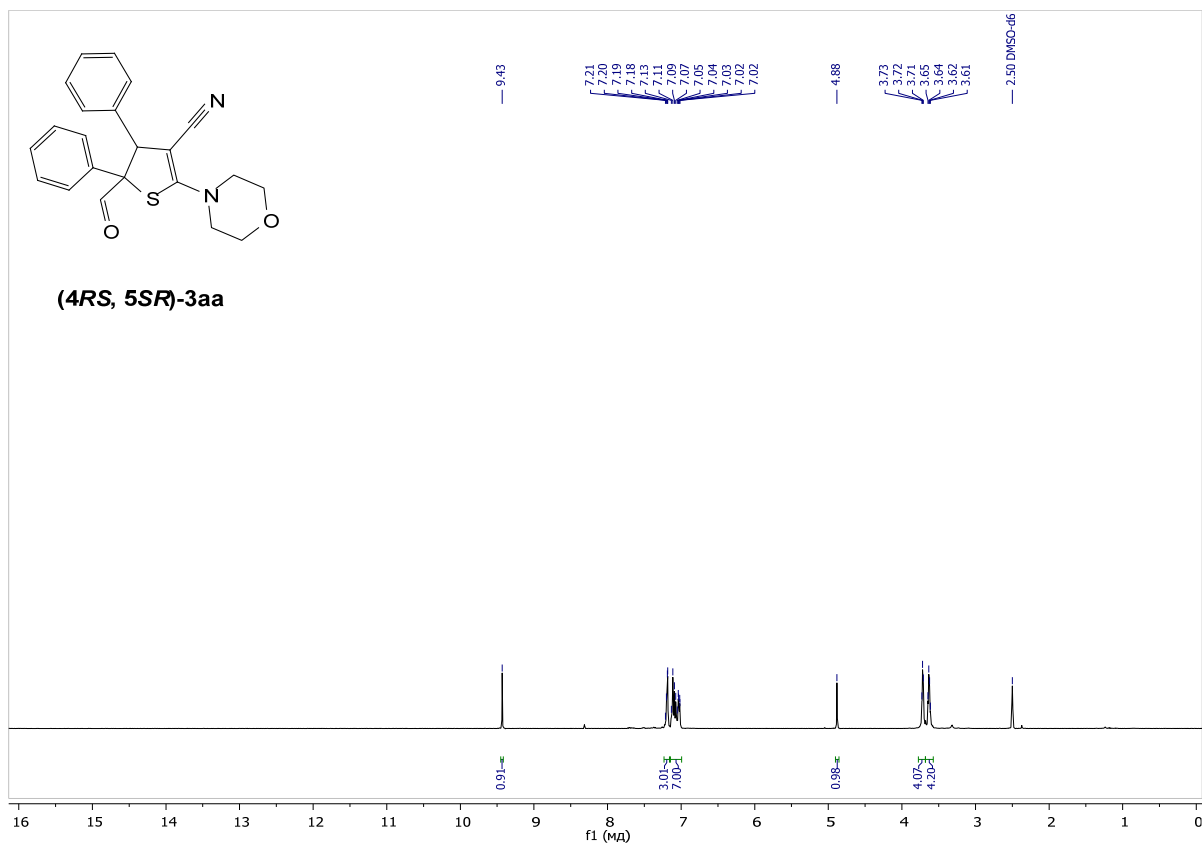

$^1\text{H}$  NMR (400 MHz, DMSO- $d_6$ ) of (4RS,5SR)-3aa

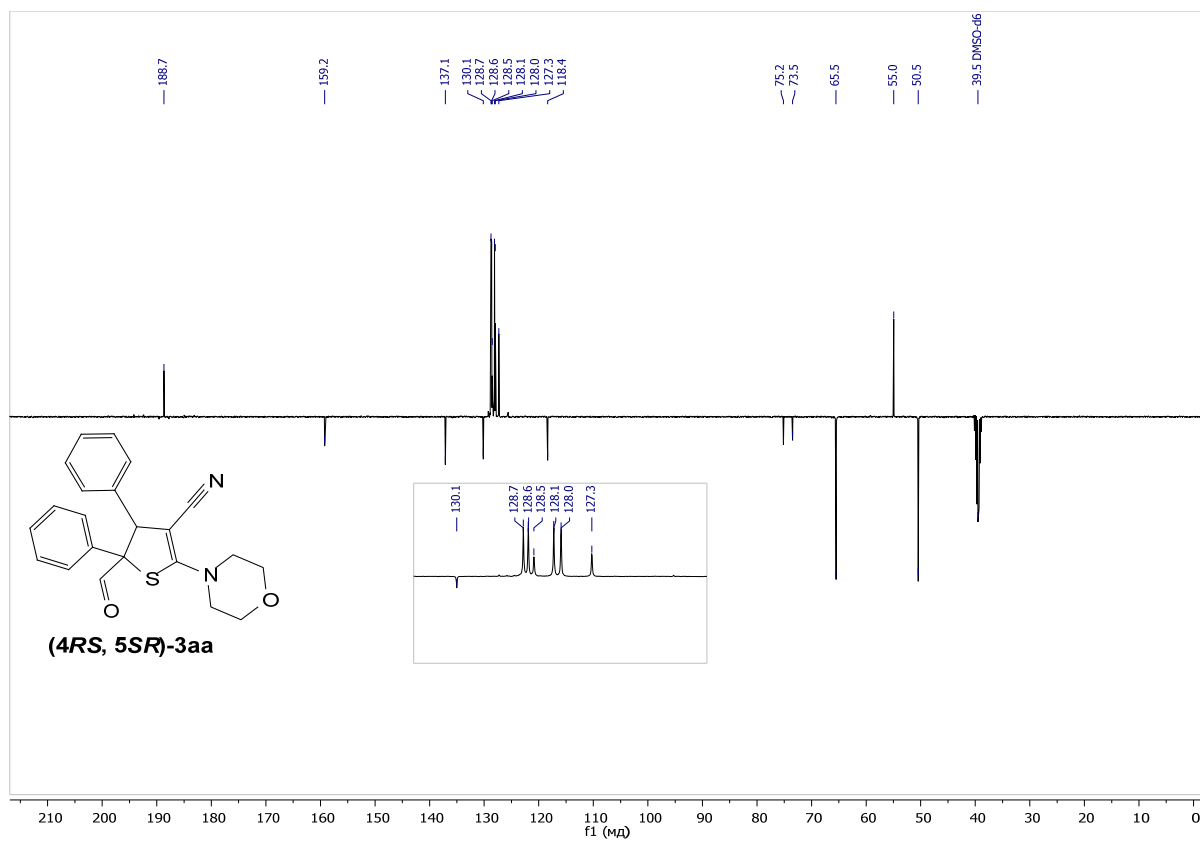

$^{13}\text{C}\{^1\text{H}\}$  NMR (100 MHz, DMSO- $d_6$ ) of (4RS,5SR)-3aa

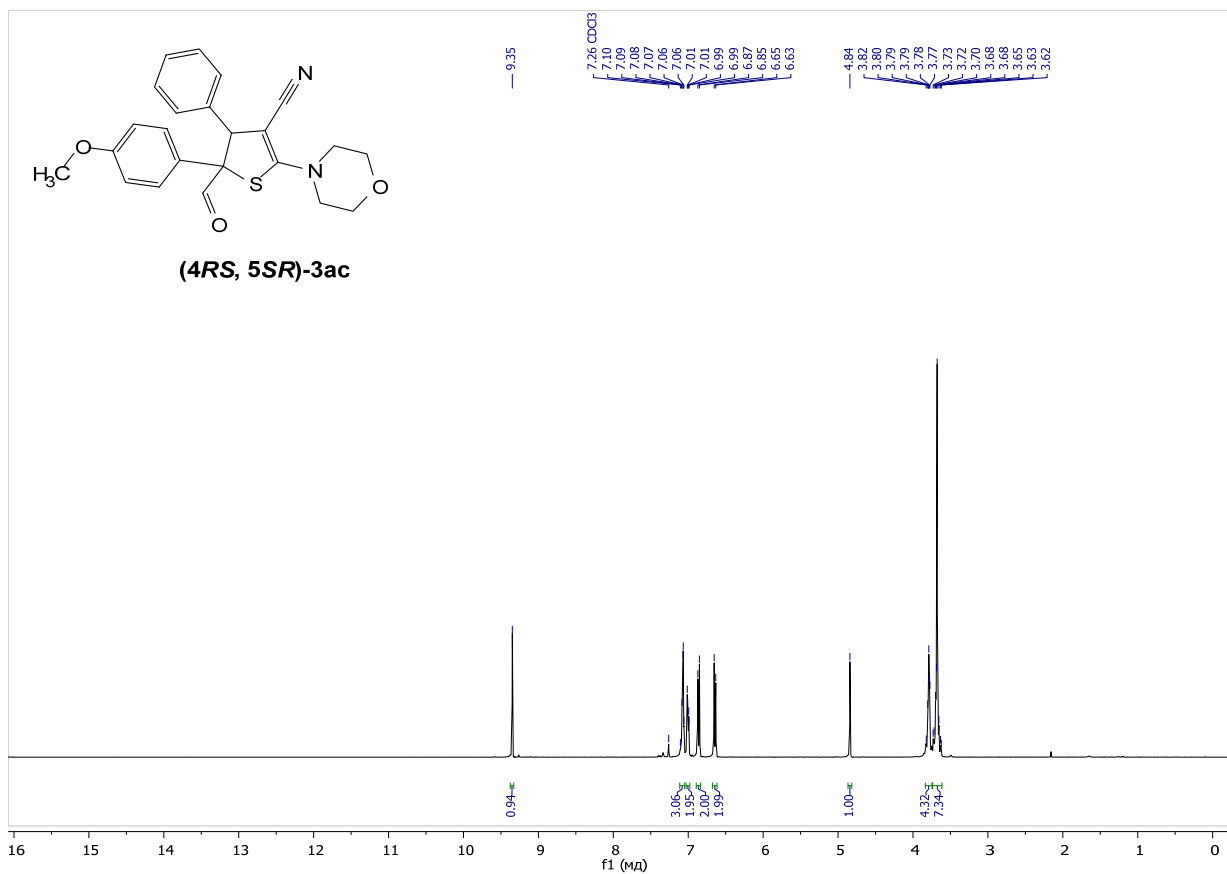

<sup>1</sup>H NMR (400 MHz, CDCl<sub>3</sub>-d) of (4RS,5SR)-3ac

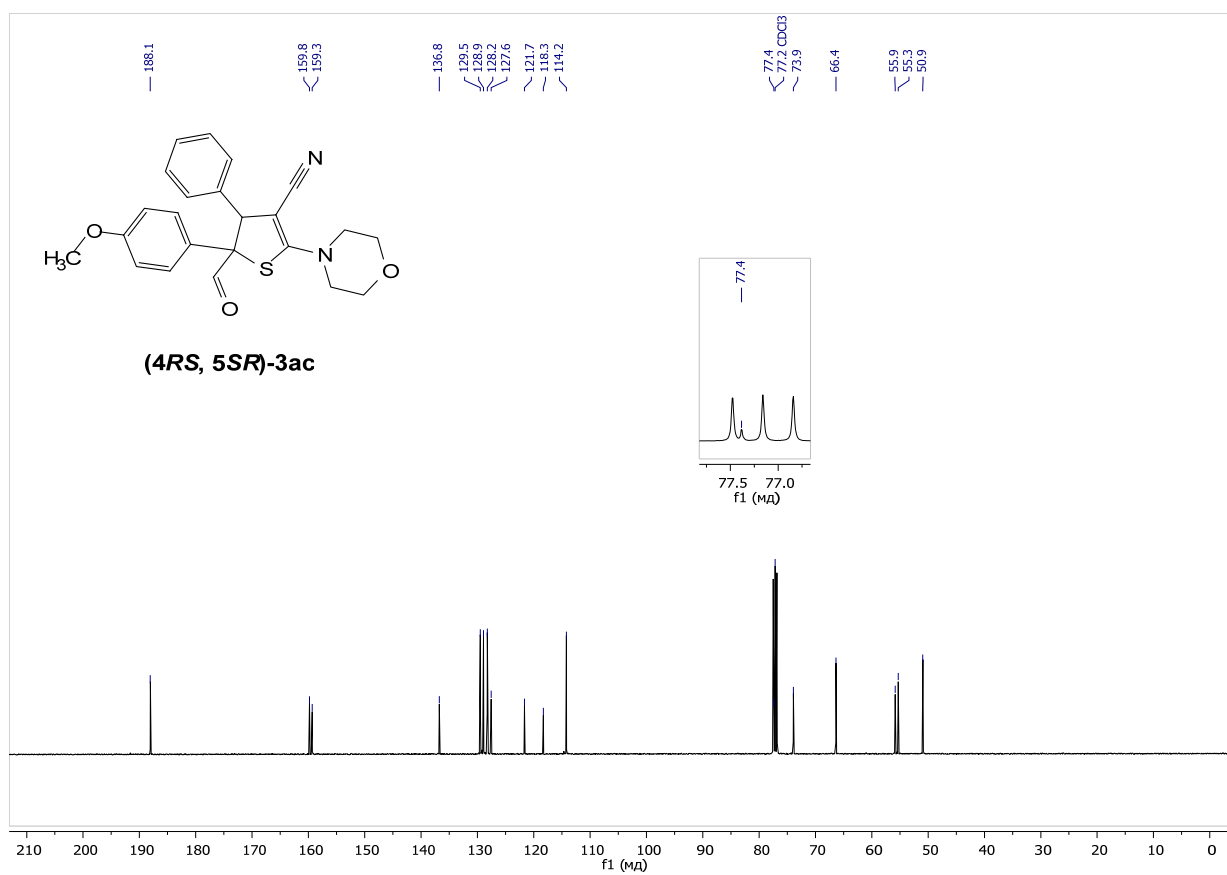

<sup>13</sup>C {<sup>1</sup>H} NMR (100 MHz, CDCl<sub>3</sub>-d) of (4RS,5SR)-3ac

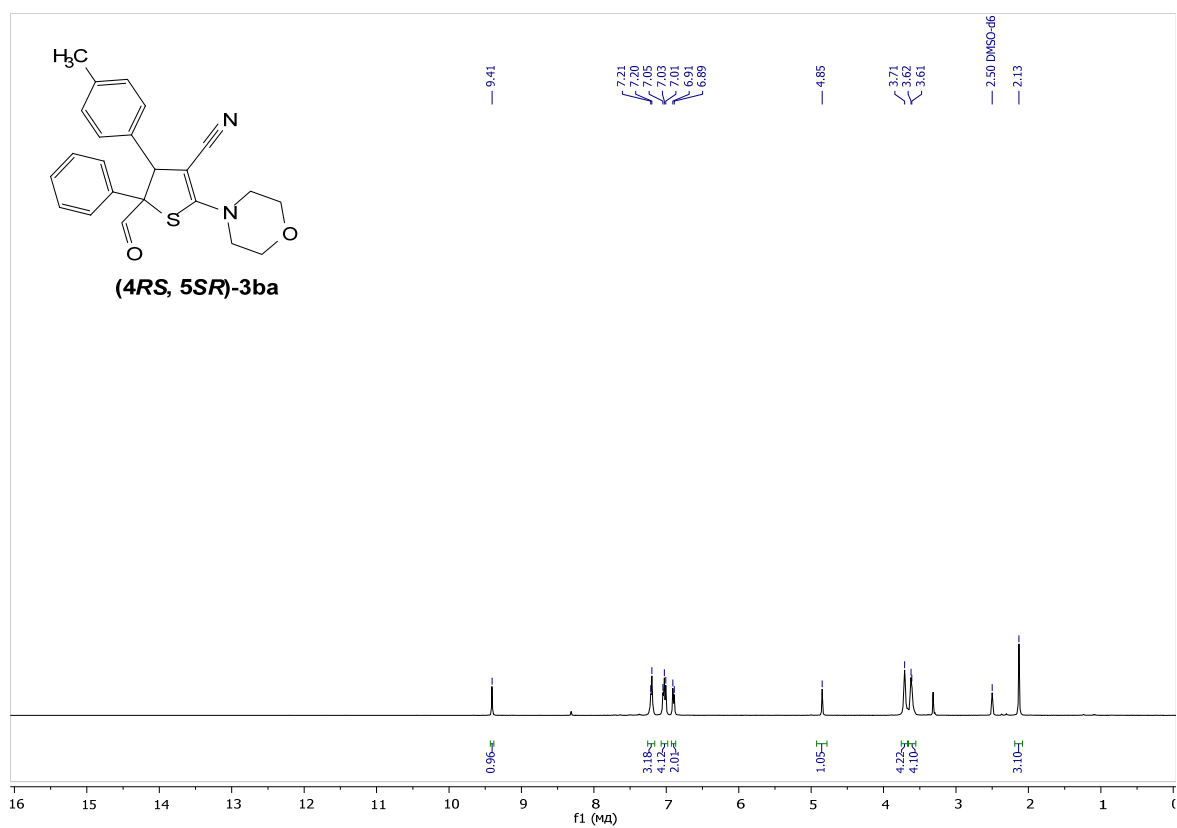

$^1\text{H}$  NMR (400 MHz, DMSO- $d_6$ ) of **(4RS, 5SR)-3ba**

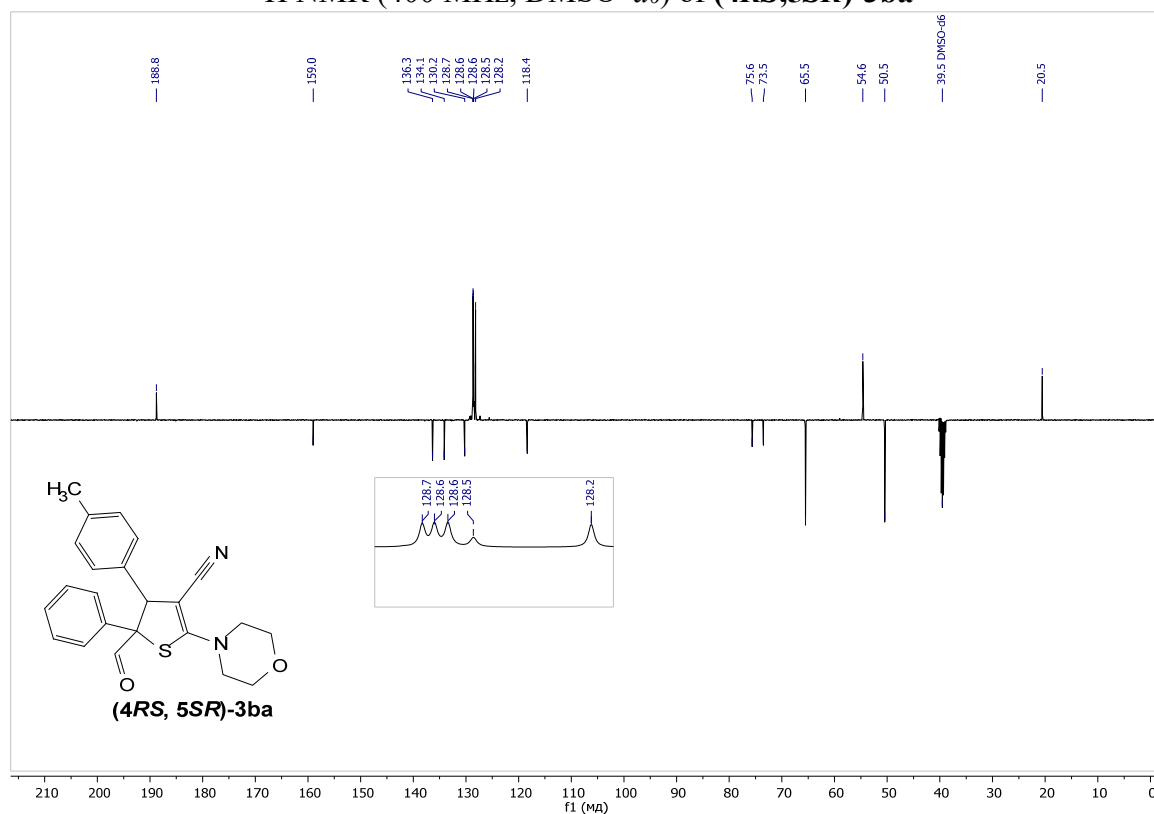

$^{13}\text{C}$  NMR (100 MHz, DMSO- $d_6$ ) of **(4RS, 5SR)-3ba**

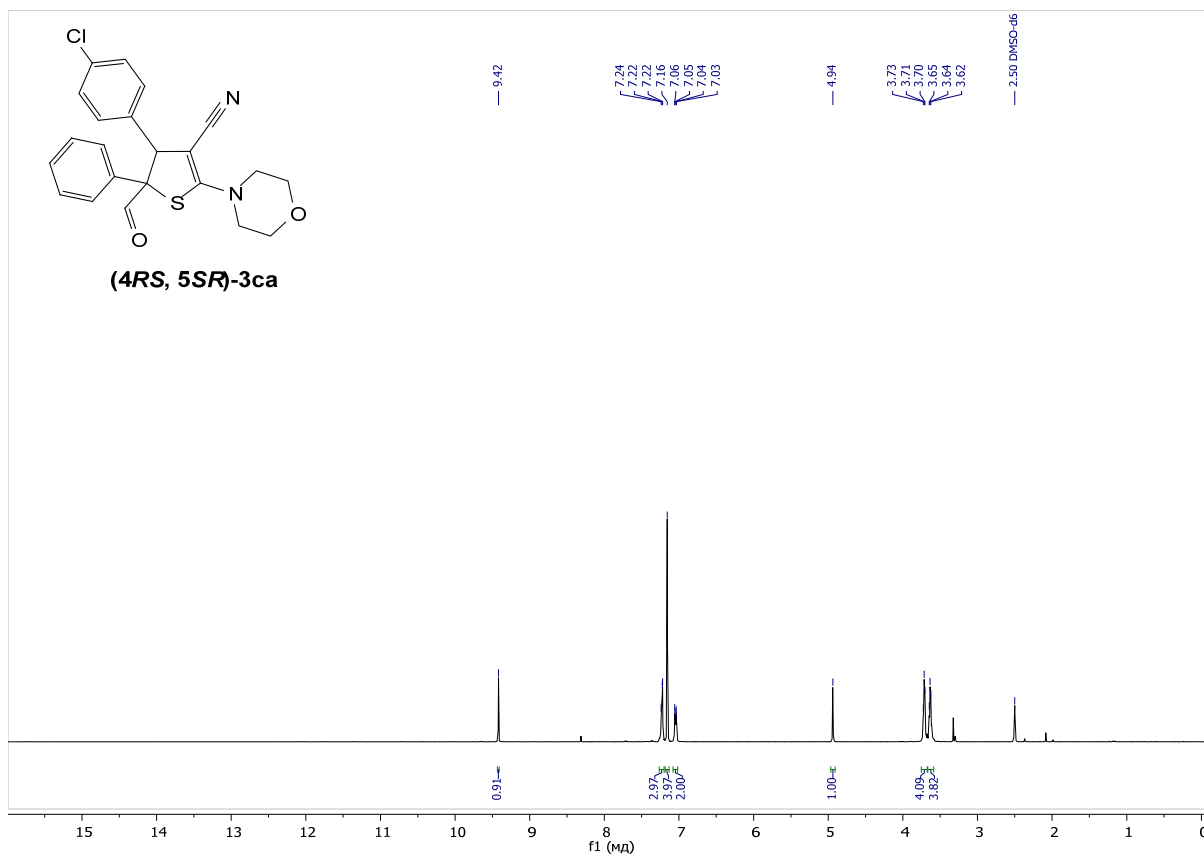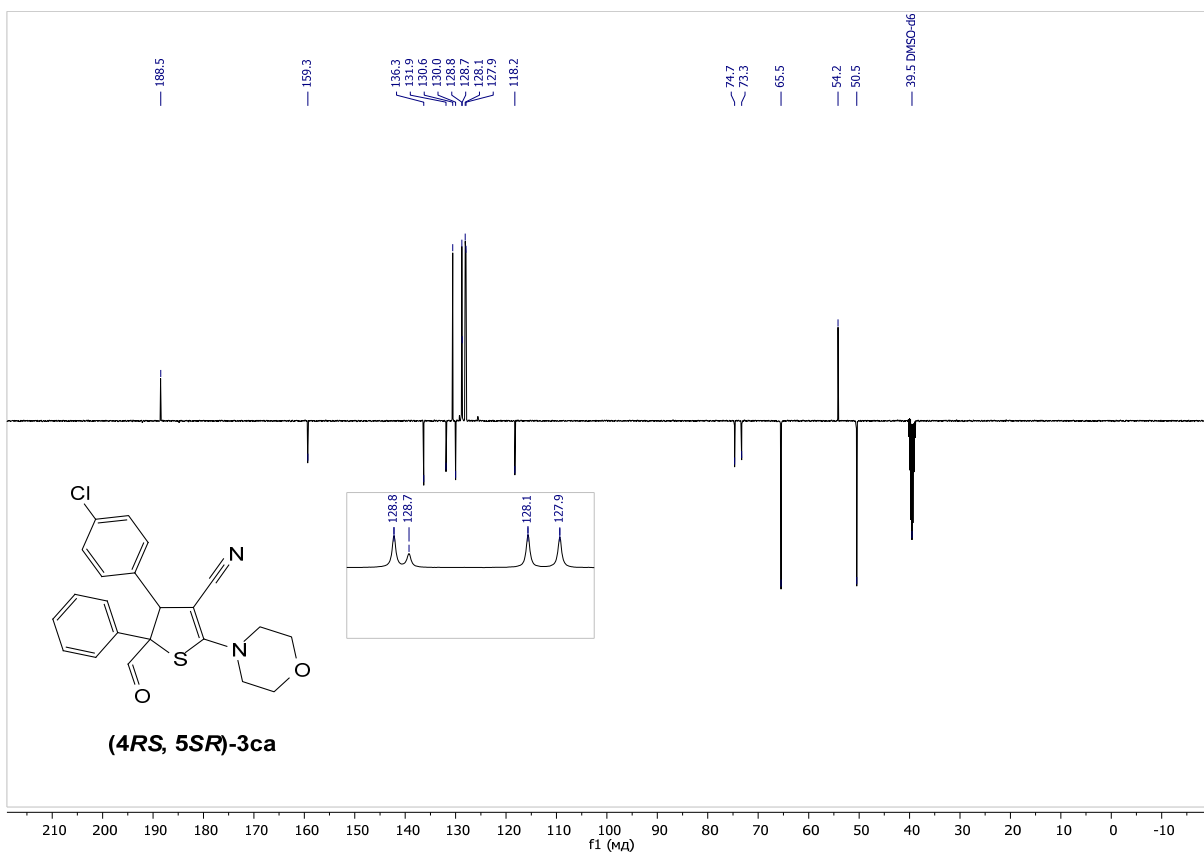

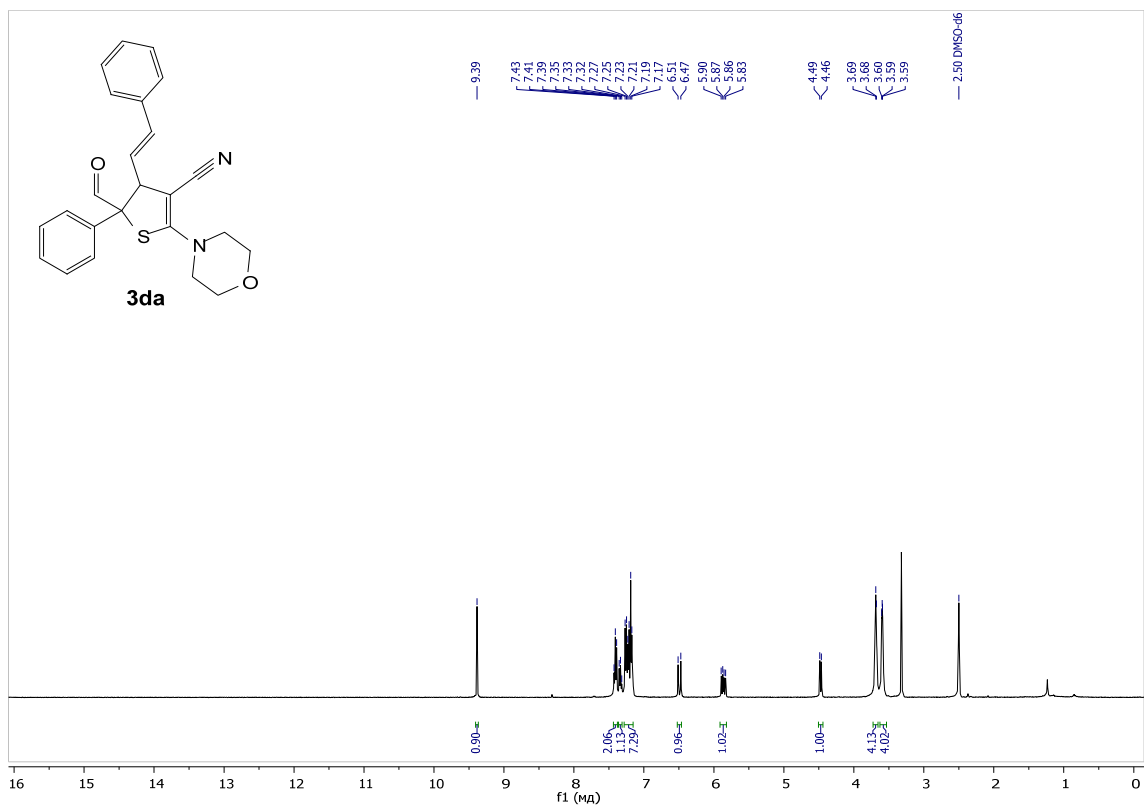

$^1\text{H}$  NMR (400 MHz,  $\text{DMSO}-d_6$ ) of **3da**

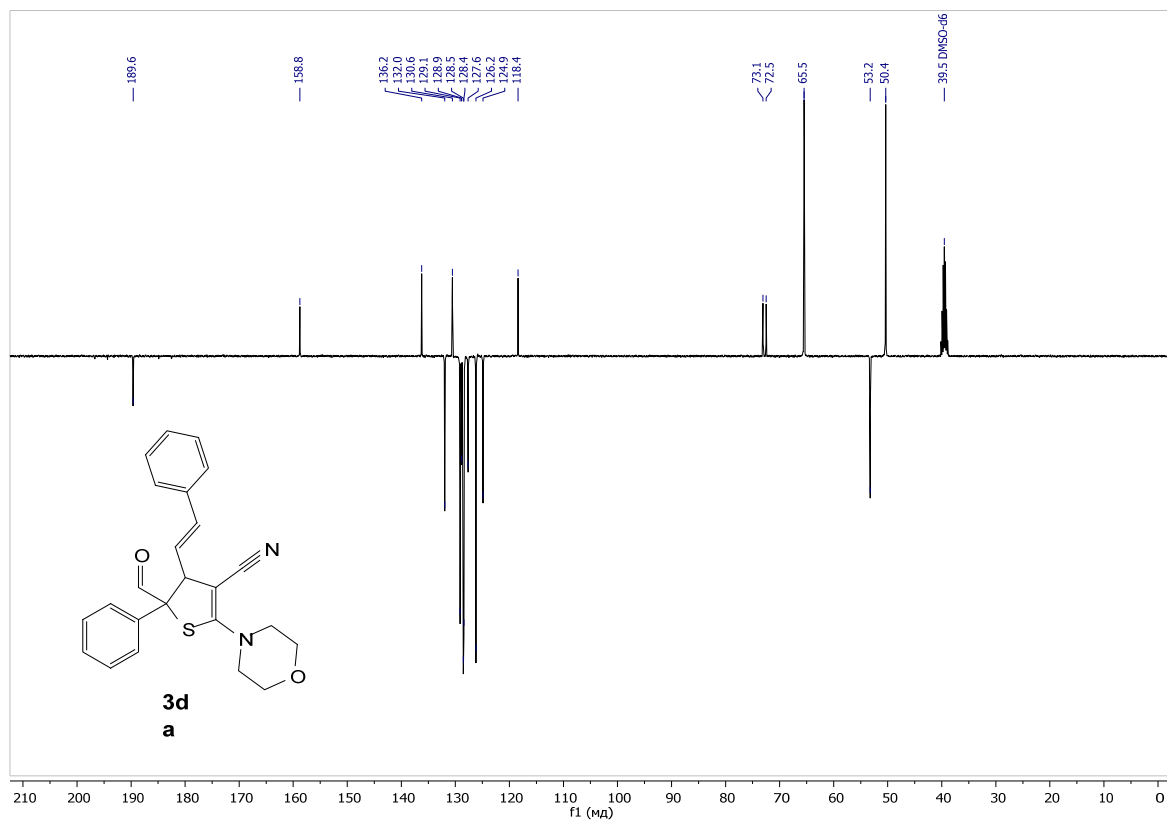

$^{13}\text{C}$  { $^1\text{H}$ } NMR (100 MHz,  $\text{DMSO}-d_6$ ) of **3da**



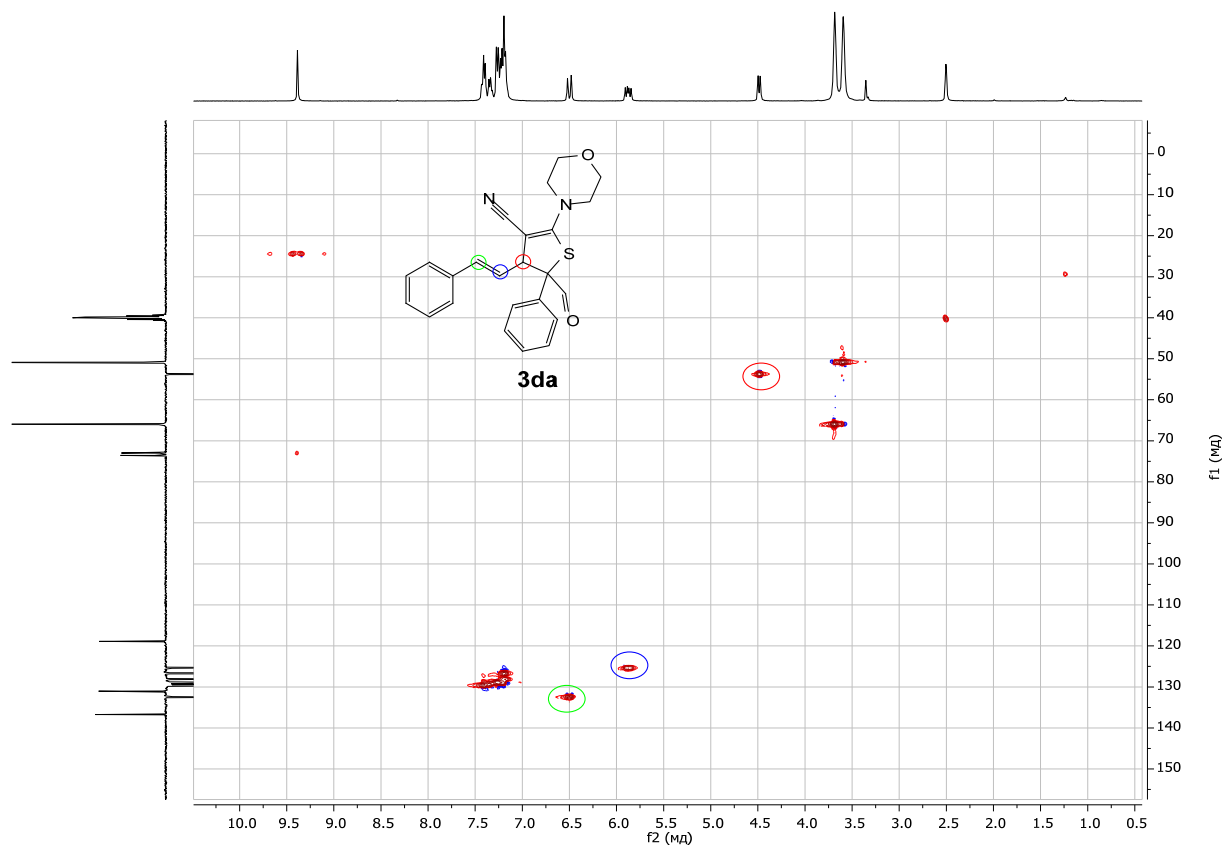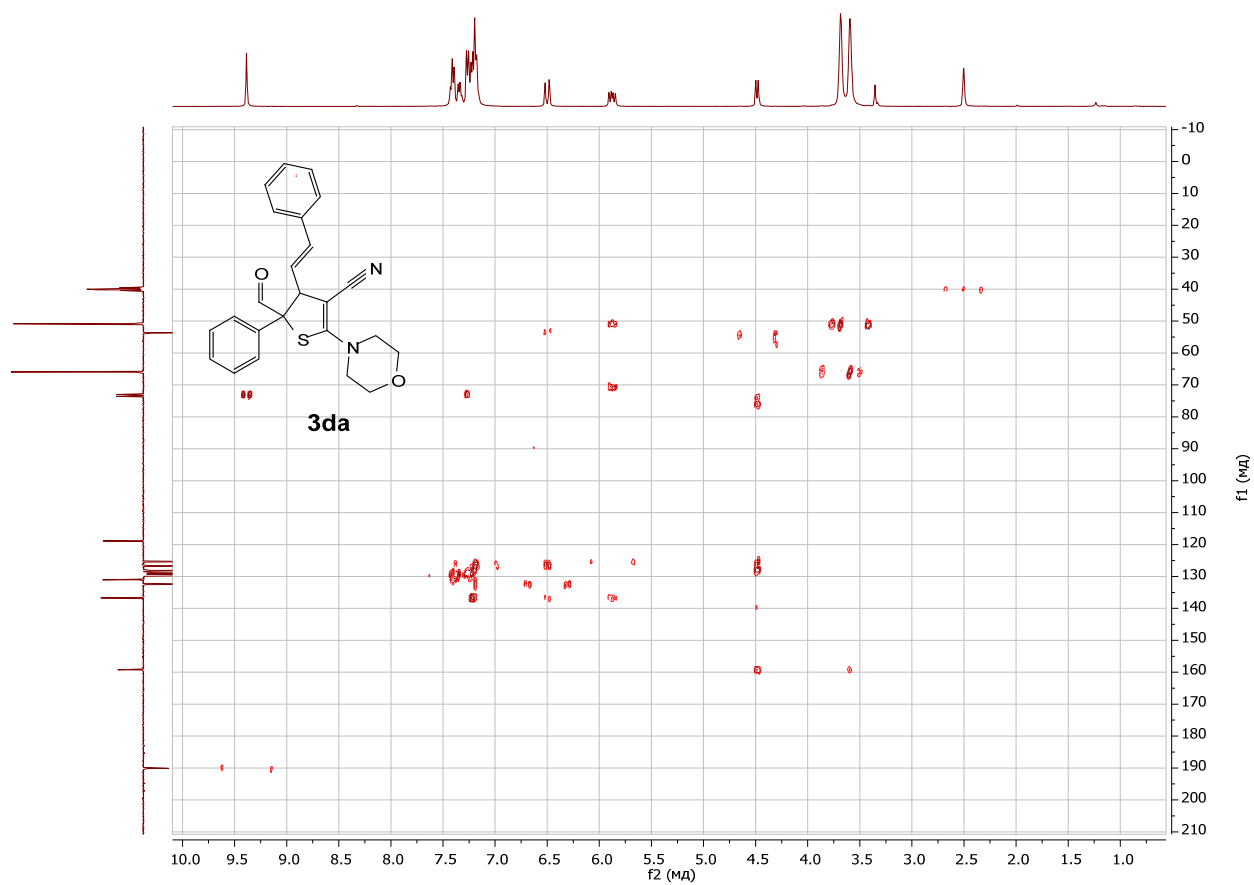

HSQC and HMBC spectra of **3da**

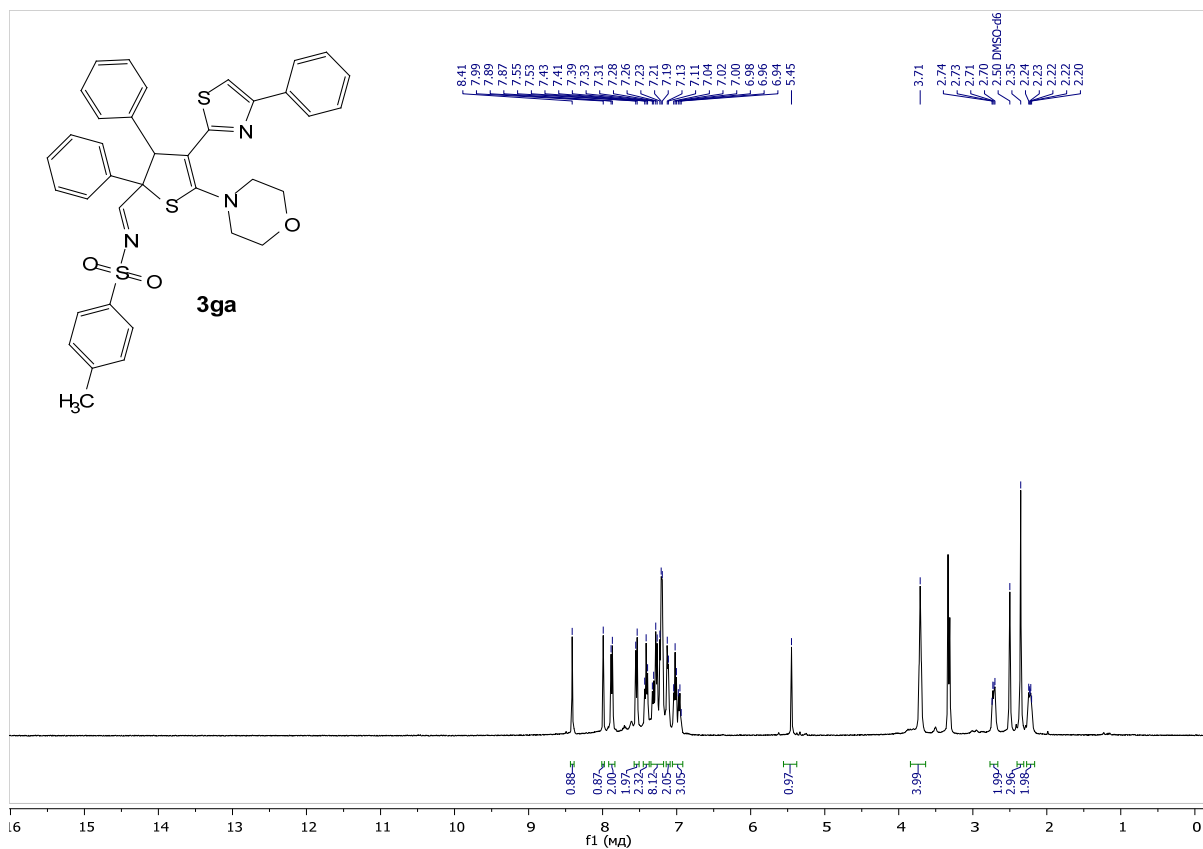

<sup>1</sup>H NMR (400 MHz, DMSO-*d*<sub>6</sub>) of **3ga**

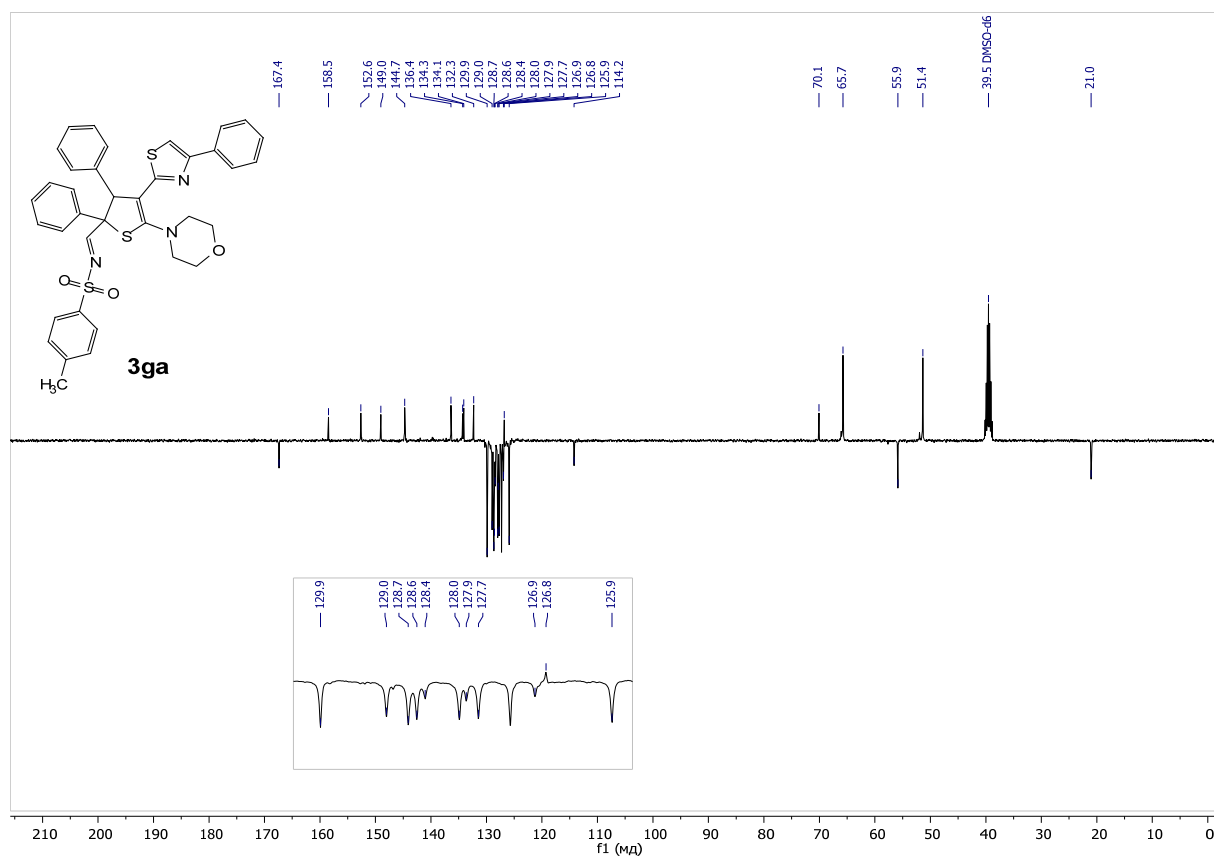

<sup>13</sup>C {<sup>1</sup>H} NMR (100 MHz, DMSO-*d*<sub>6</sub>) of **3ga**

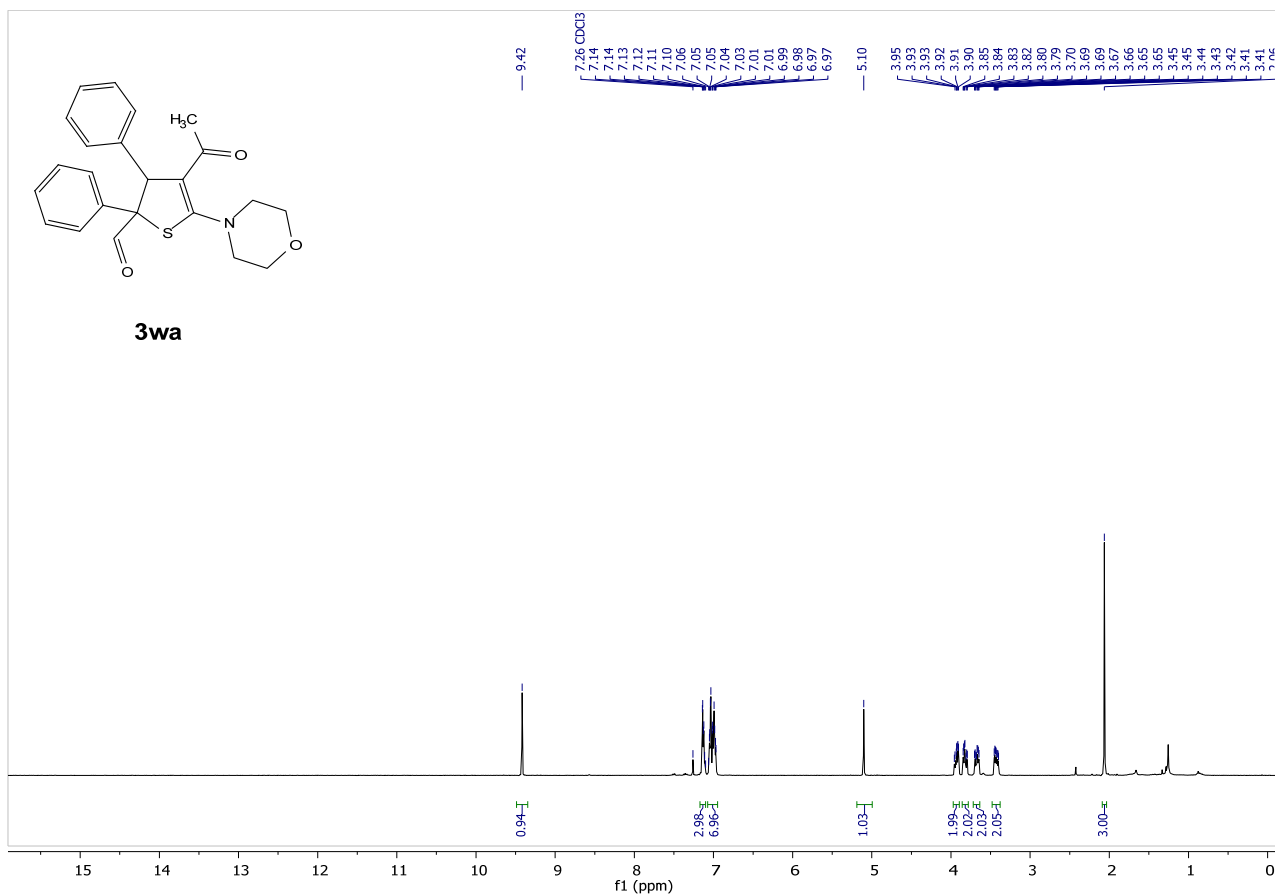

<sup>1</sup>H NMR (400 MHz, CDCl<sub>3</sub>-d) of **3wa**

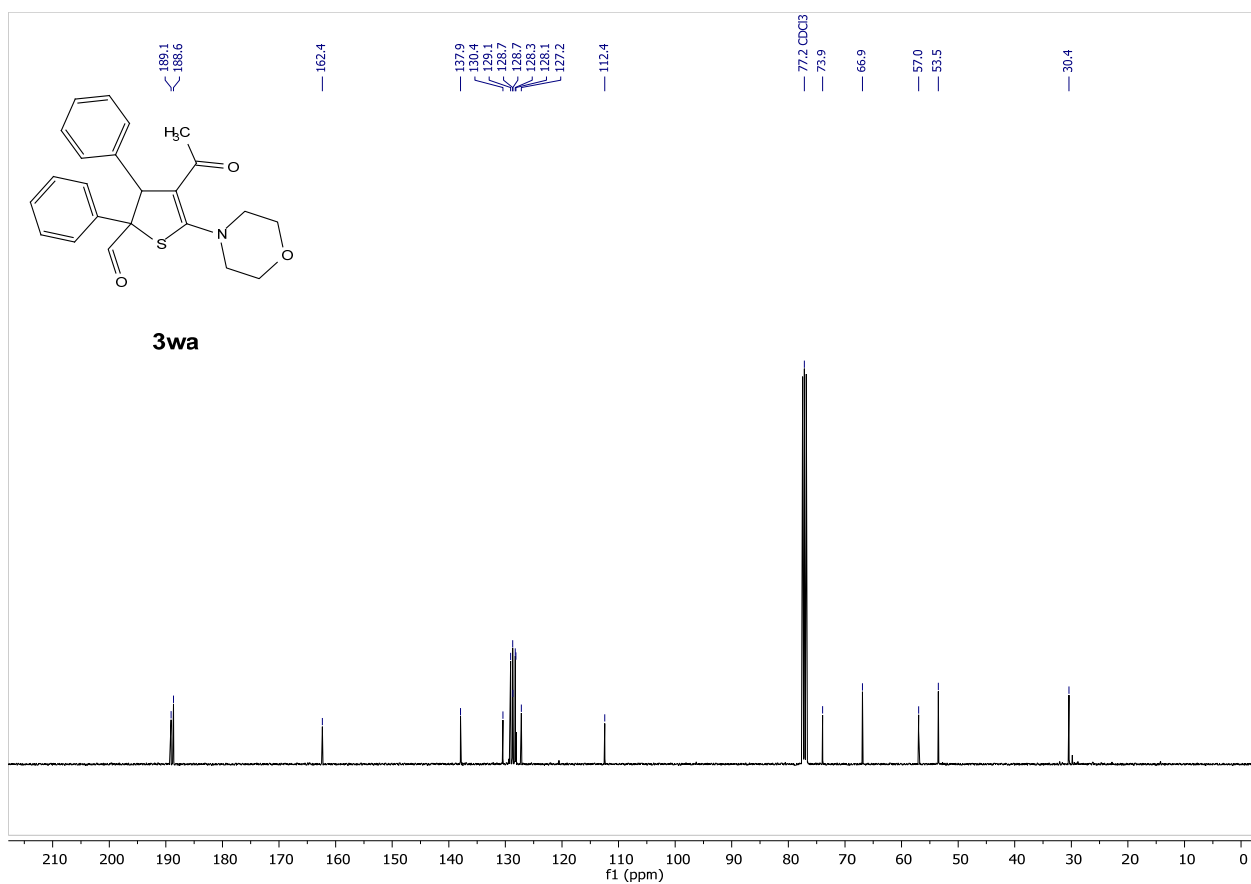

<sup>13</sup>C {<sup>1</sup>H} NMR (100 MHz, CDCl<sub>3</sub>-d) of **3wa**

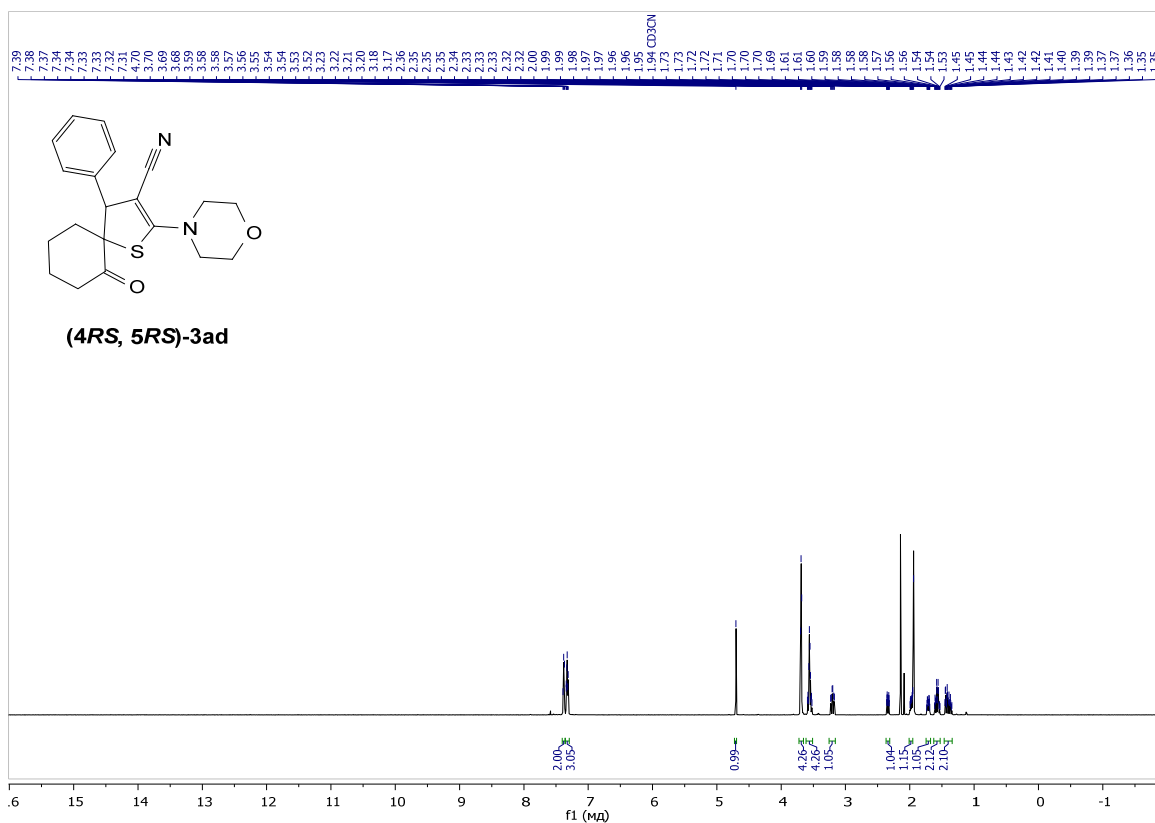

<sup>1</sup>H NMR (600 MHz, CD<sub>3</sub>CN-*d*<sub>3</sub>) of (4RS,5RS)-3ad

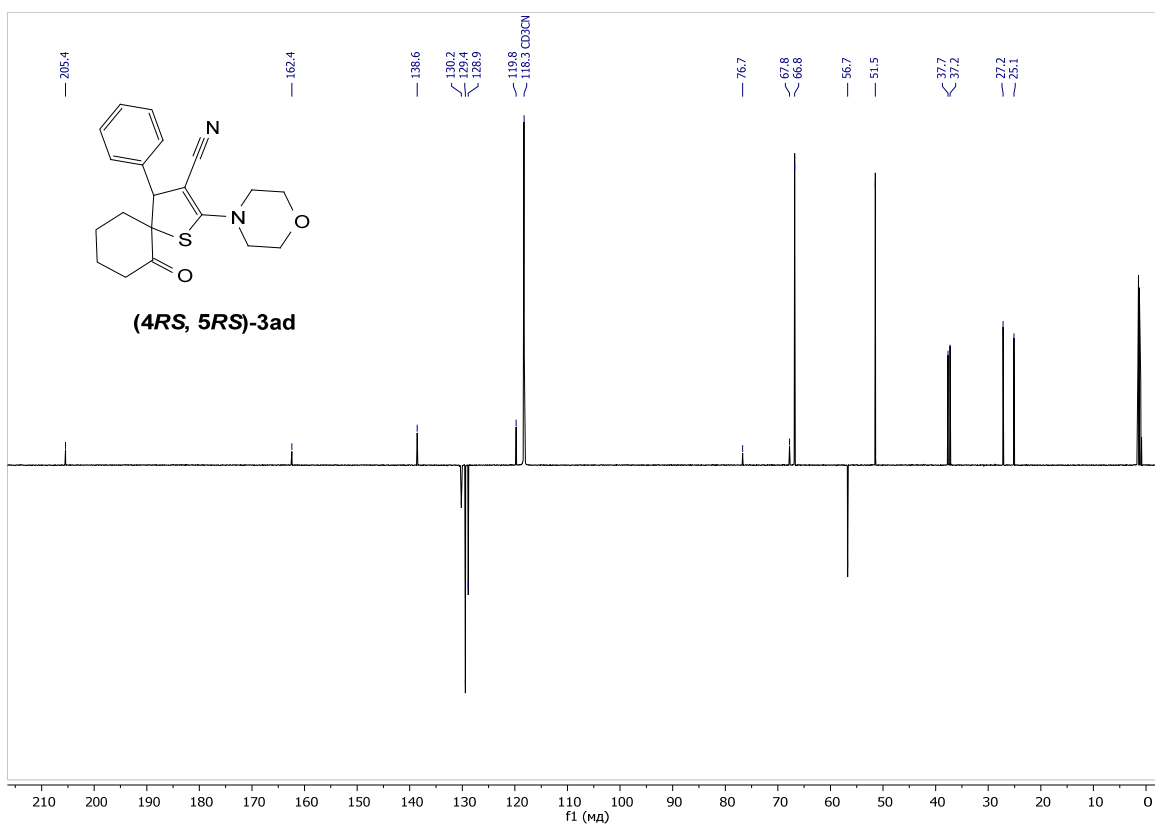

<sup>13</sup>C {<sup>1</sup>H} NMR (150 MHz, CD<sub>3</sub>CN-*d*<sub>3</sub>) of (4RS,5RS)-3ad

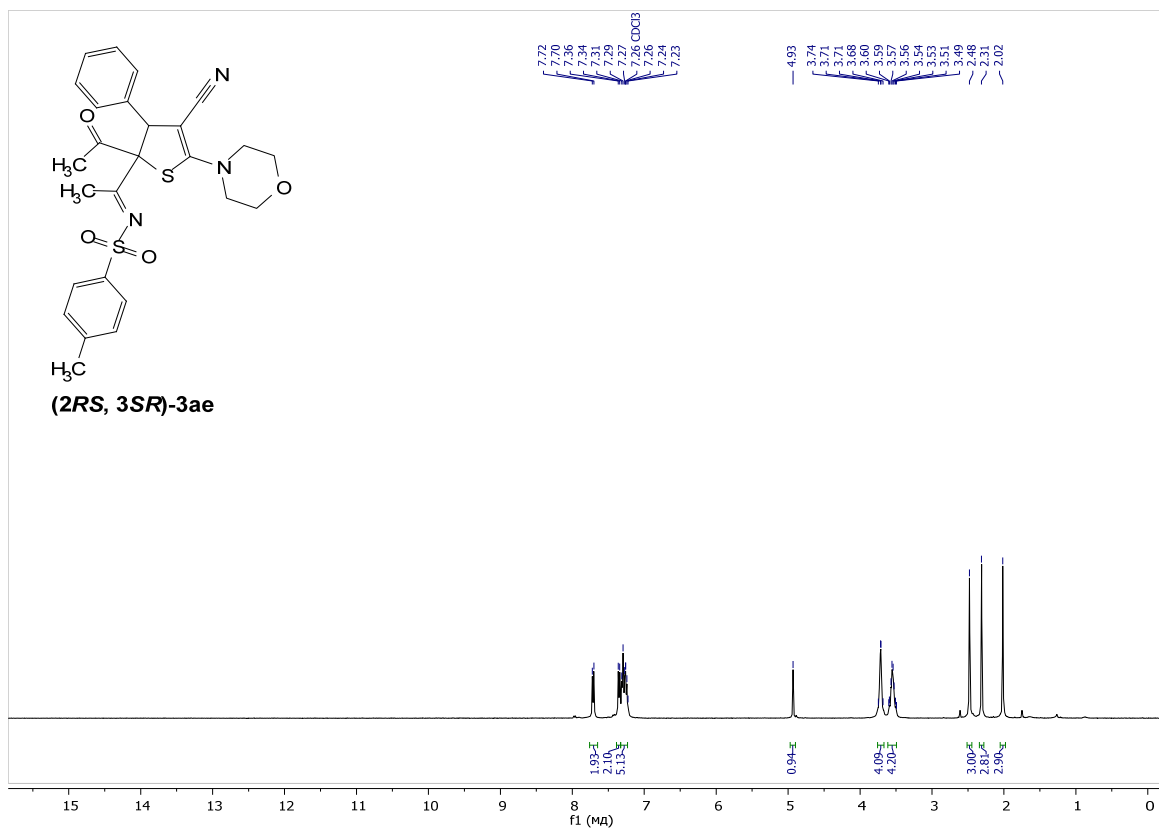

<sup>1</sup>H NMR (400 MHz, CDCl<sub>3</sub>-d) of (2RS,3SR)-3ae

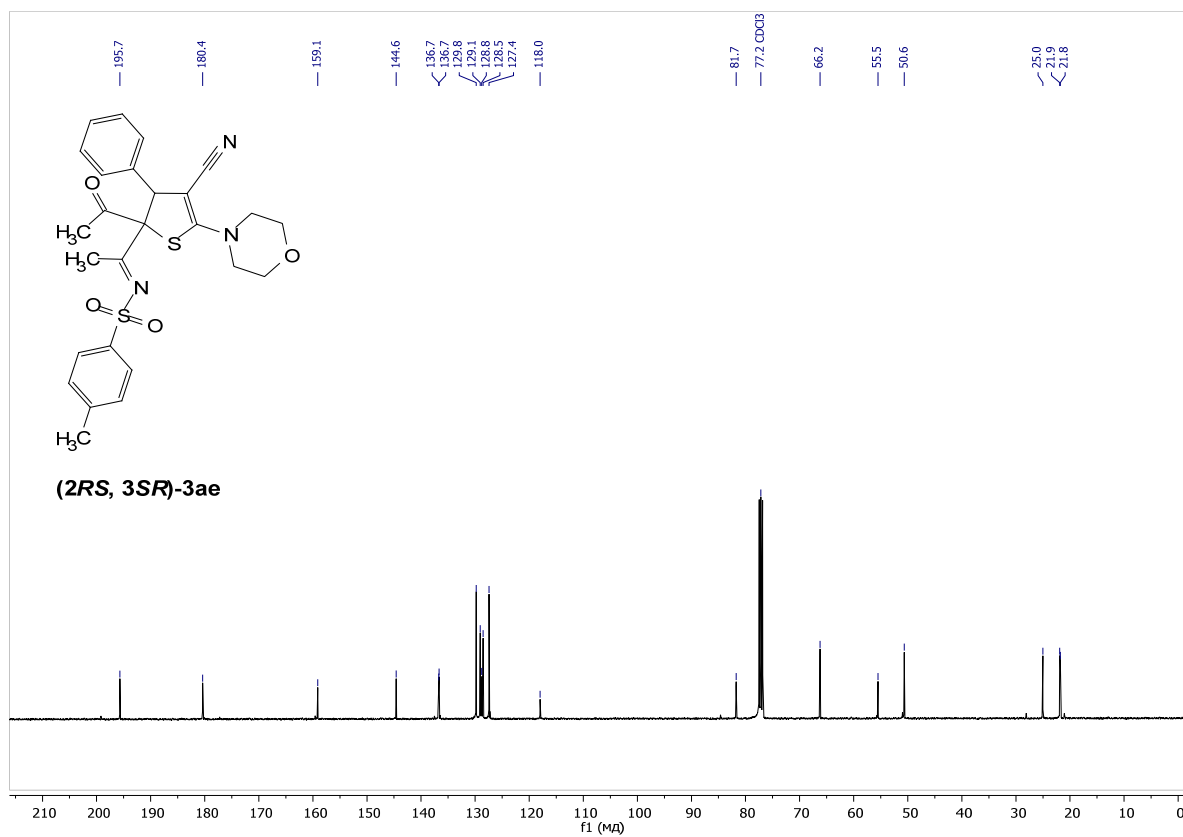

<sup>13</sup>C {<sup>1</sup>H} NMR (100 MHz, CDCl<sub>3</sub>-d) of (2RS,3SR)-3ae

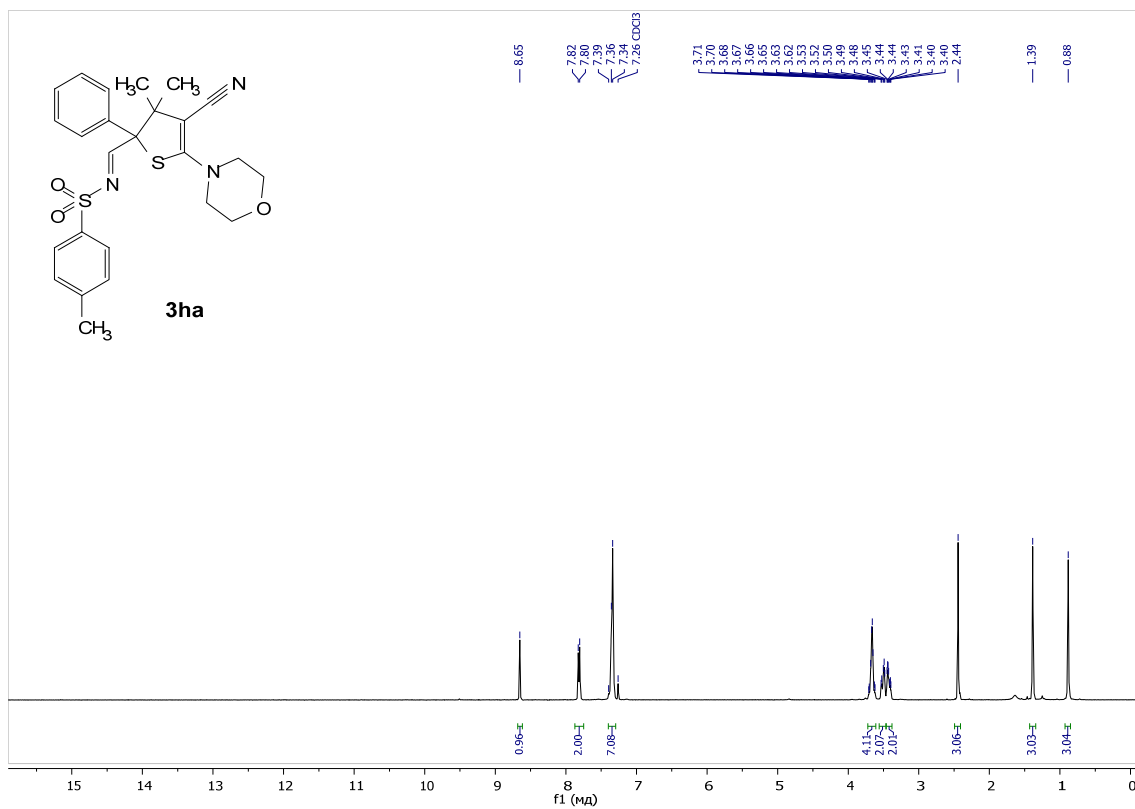

<sup>1</sup>H NMR (400 MHz, CDCl<sub>3</sub>-d) of **3ha**

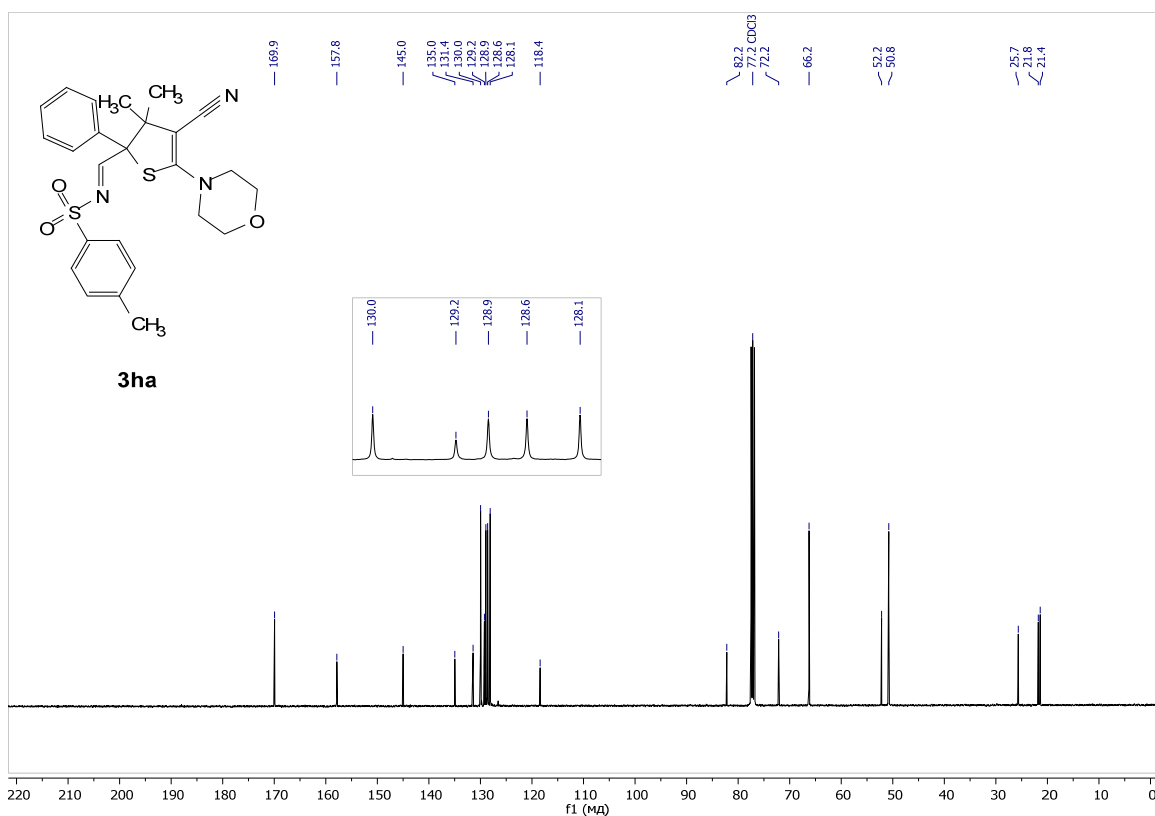

<sup>13</sup>C {<sup>1</sup>H} NMR (100 MHz, CDCl<sub>3</sub>-d) of **3ha**

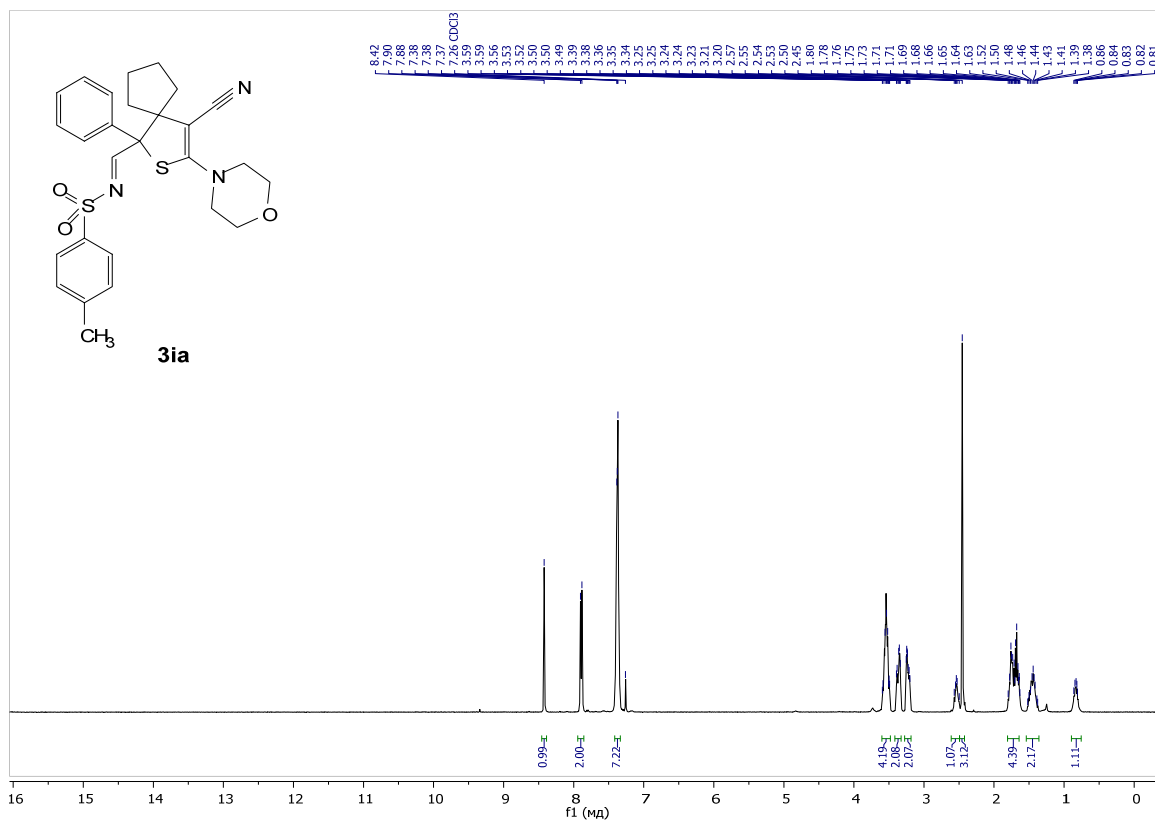

<sup>1</sup>H NMR (400 MHz, CDCl<sub>3</sub>-d) of **3ia**

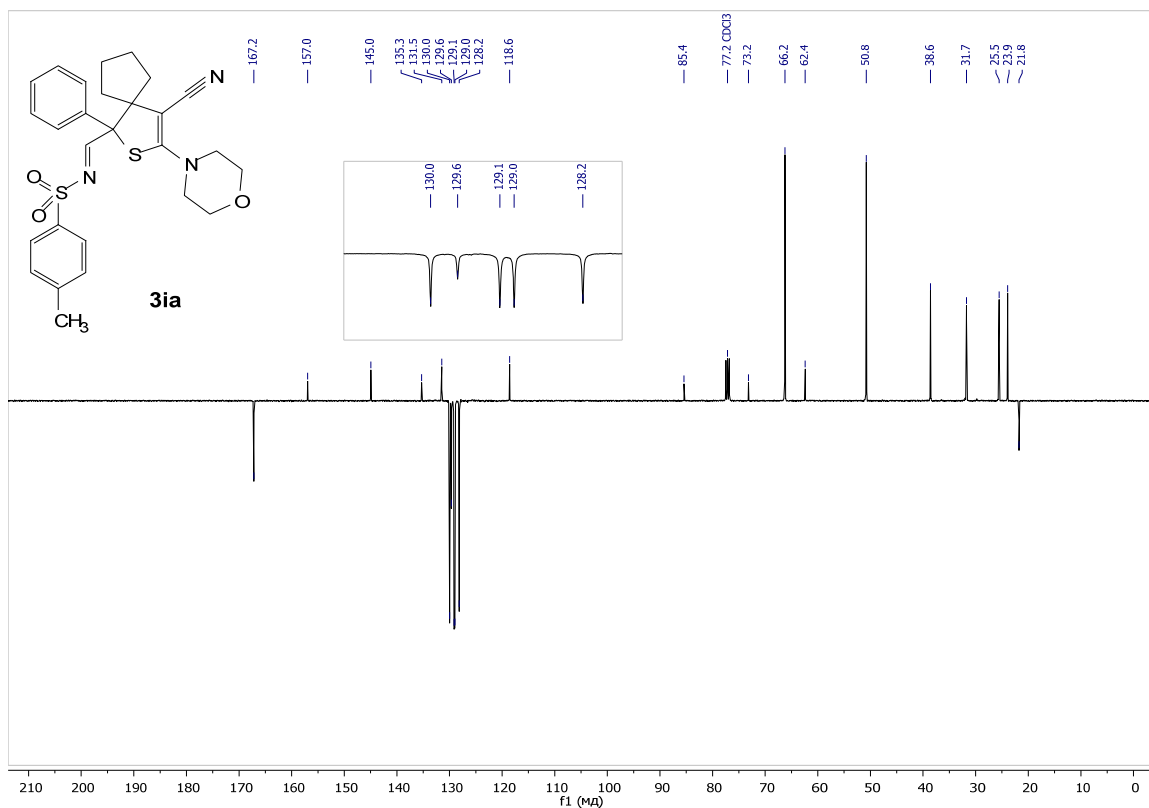

<sup>13</sup>C {<sup>1</sup>H} NMR (100 MHz, CDCl<sub>3</sub>-d) of **3ia**

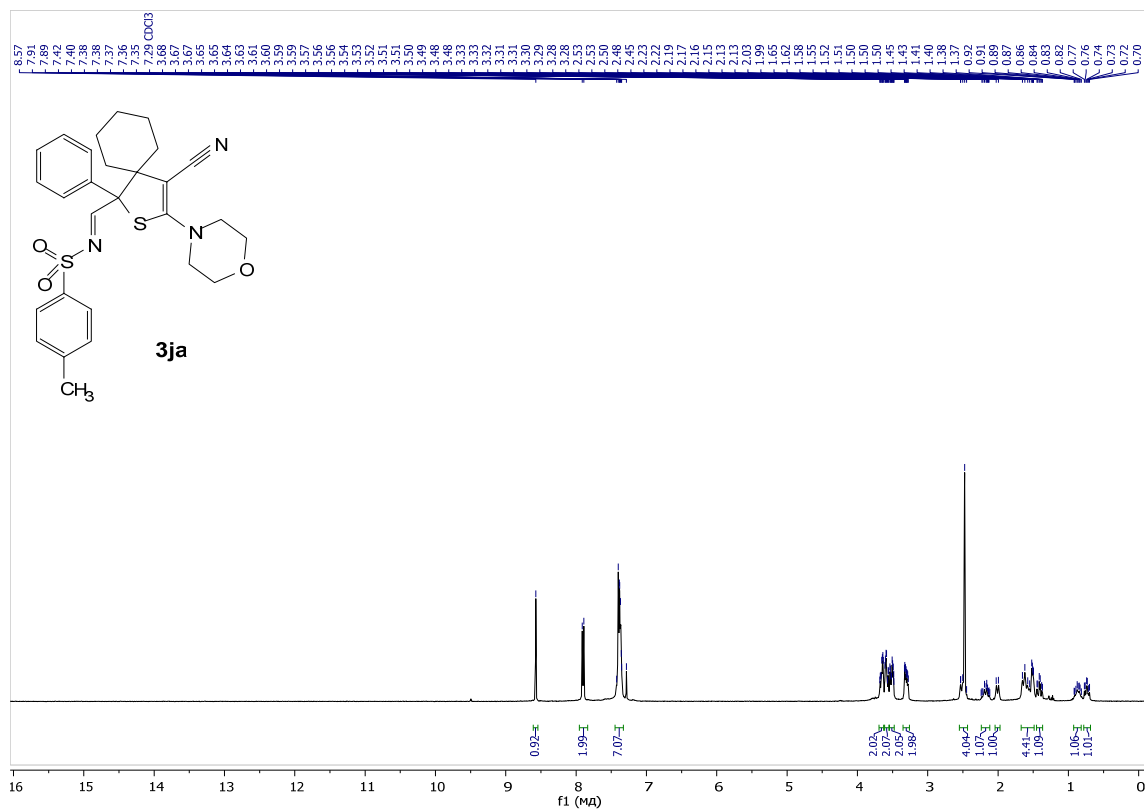

<sup>1</sup>H NMR (400 MHz, CDCl<sub>3</sub>-d) of **3ja**

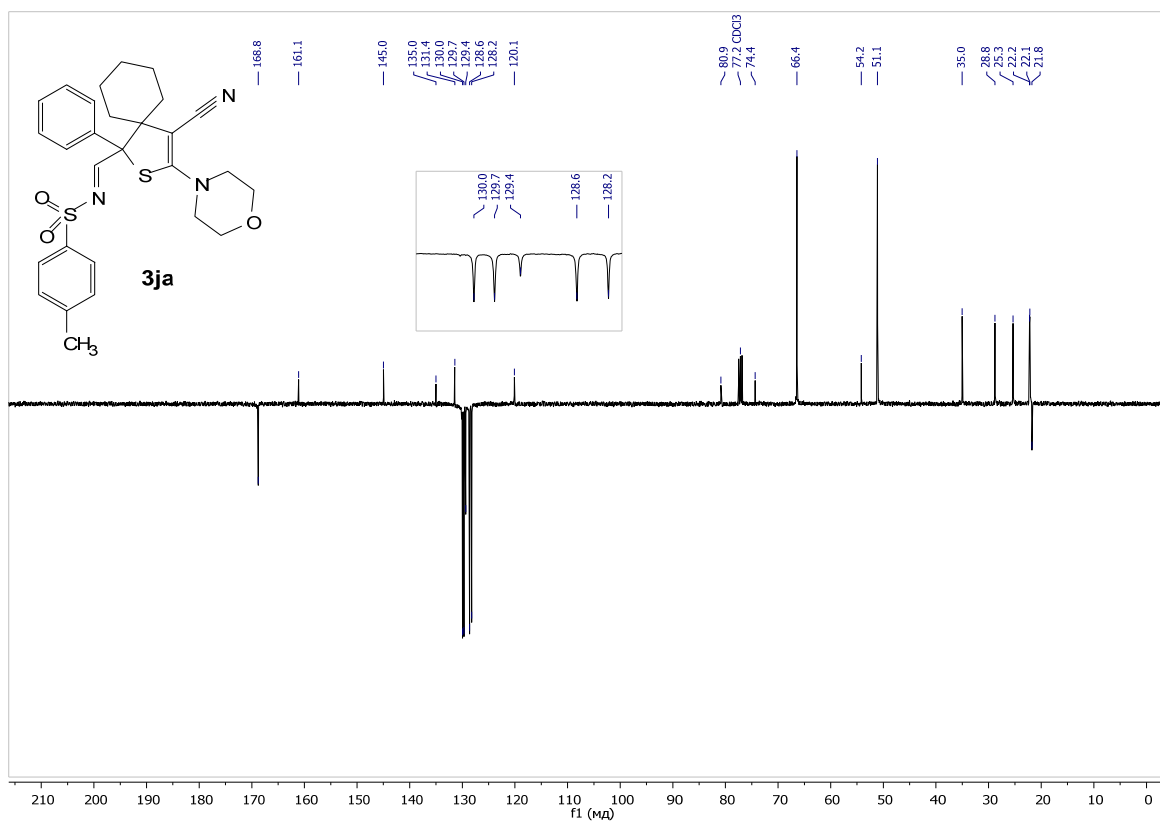

<sup>13</sup>C {<sup>1</sup>H} NMR (100 MHz, CDCl<sub>3</sub>-d) of **3ja**



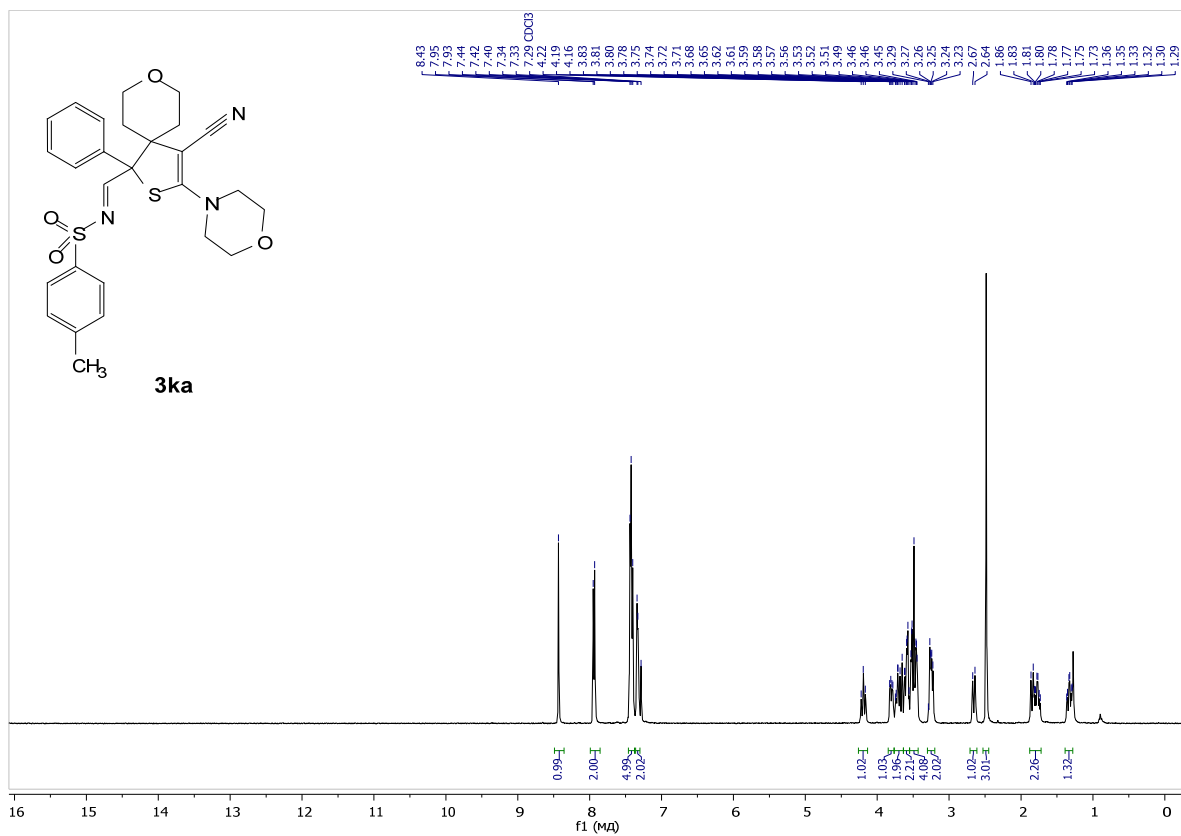

<sup>1</sup>H NMR (400 MHz, CDCl<sub>3</sub>-d) of **3ka**

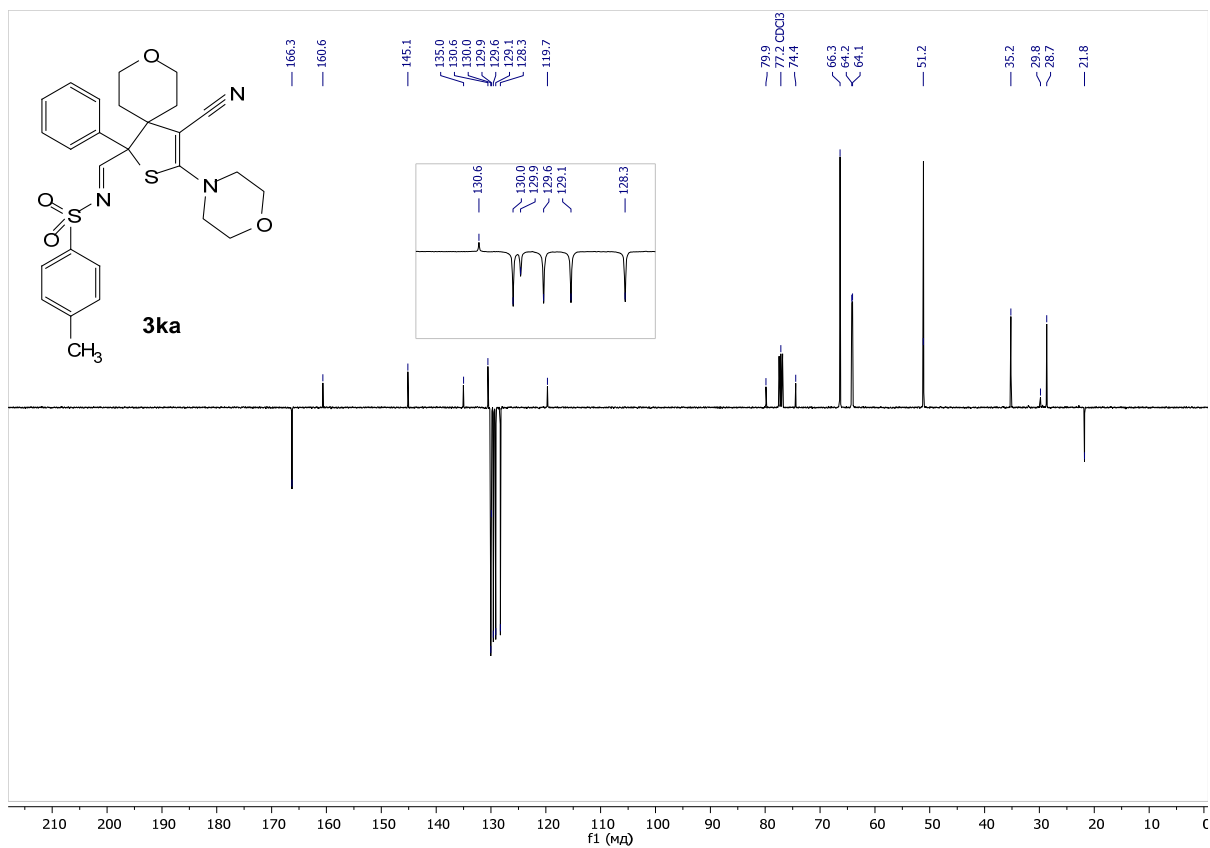

<sup>13</sup>C {<sup>1</sup>H} NMR (100 MHz, CDCl<sub>3</sub>-d) of **3ka**

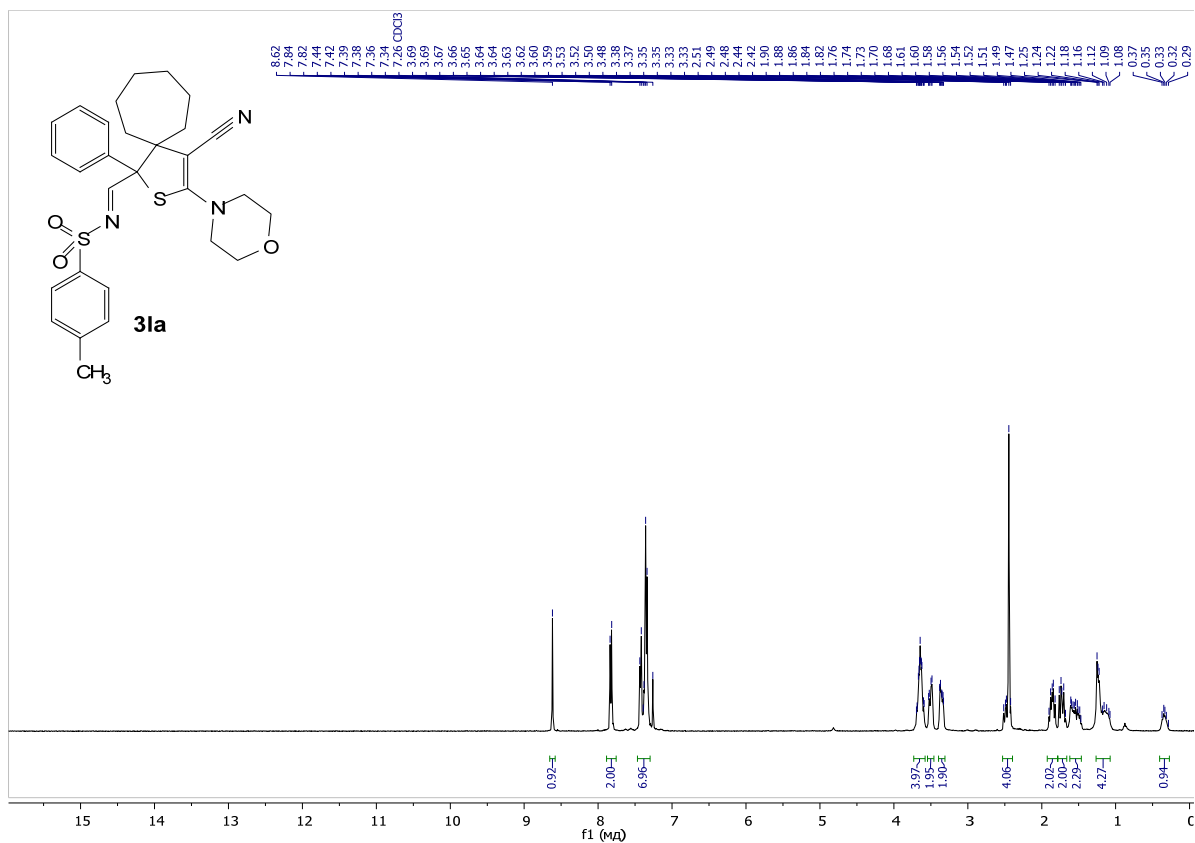

<sup>1</sup>H NMR (400 MHz, CDCl<sub>3</sub>-d) of 3la

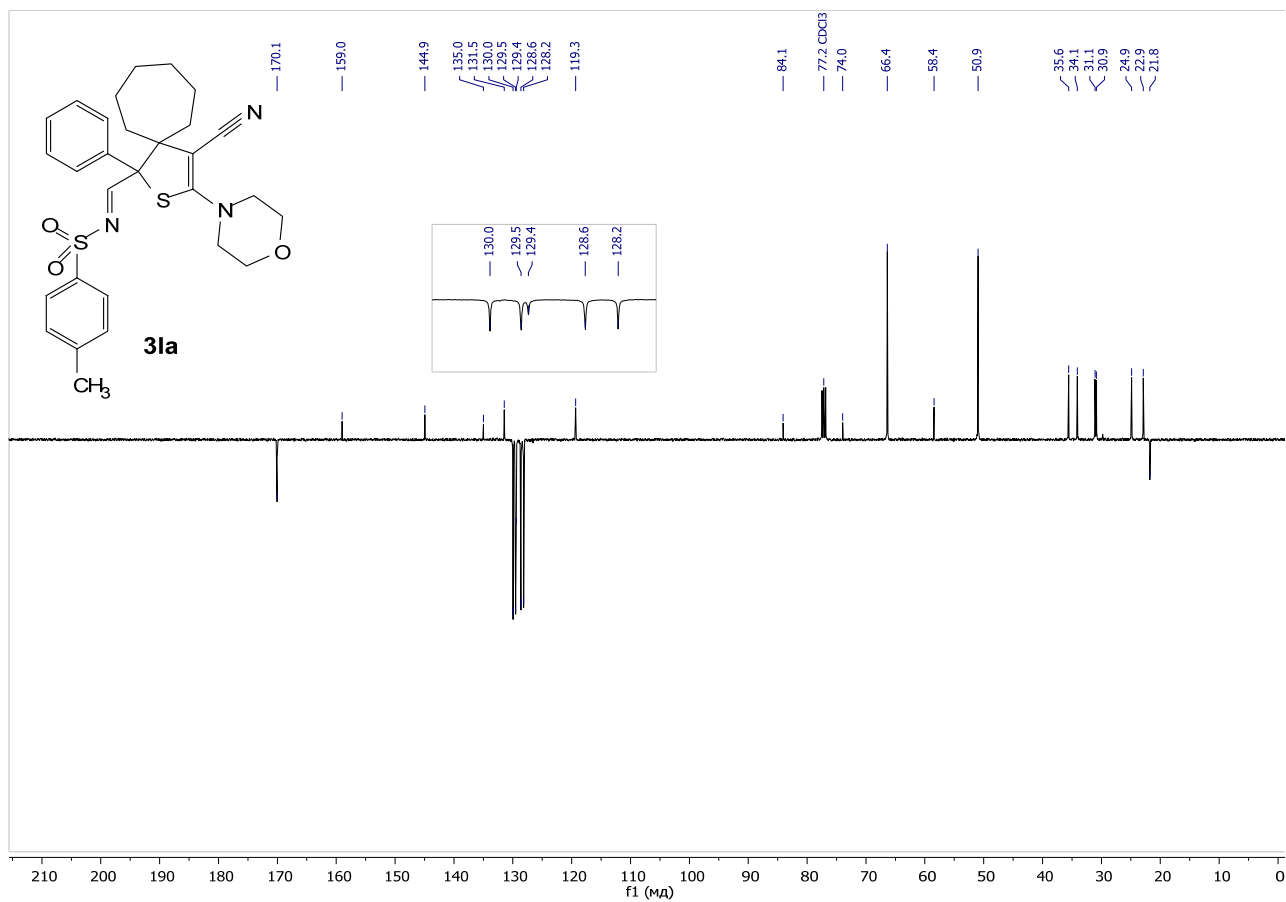

<sup>13</sup>C {<sup>1</sup>H} NMR (100 MHz, CDCl<sub>3</sub>-d) of 3la

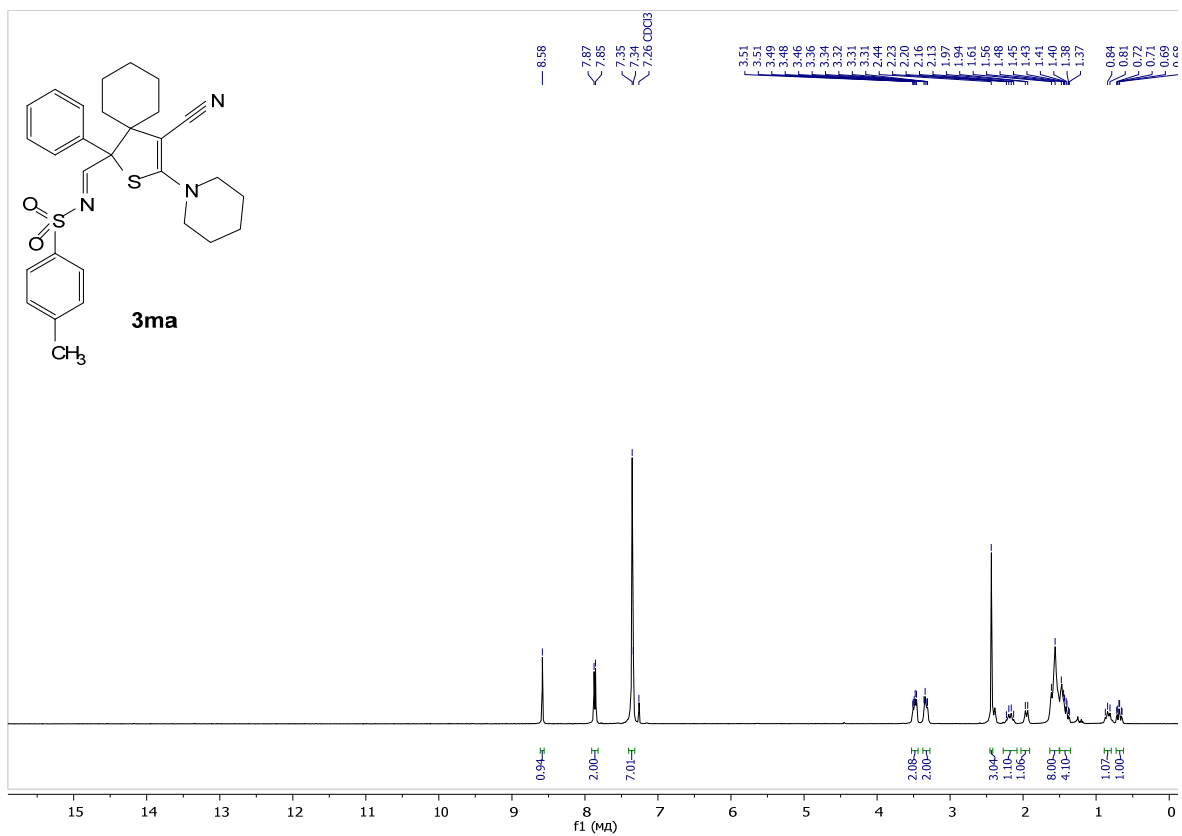

$^1\text{H}$  NMR (400 MHz,  $\text{CDCl}_3-d$ ) of **3ma**

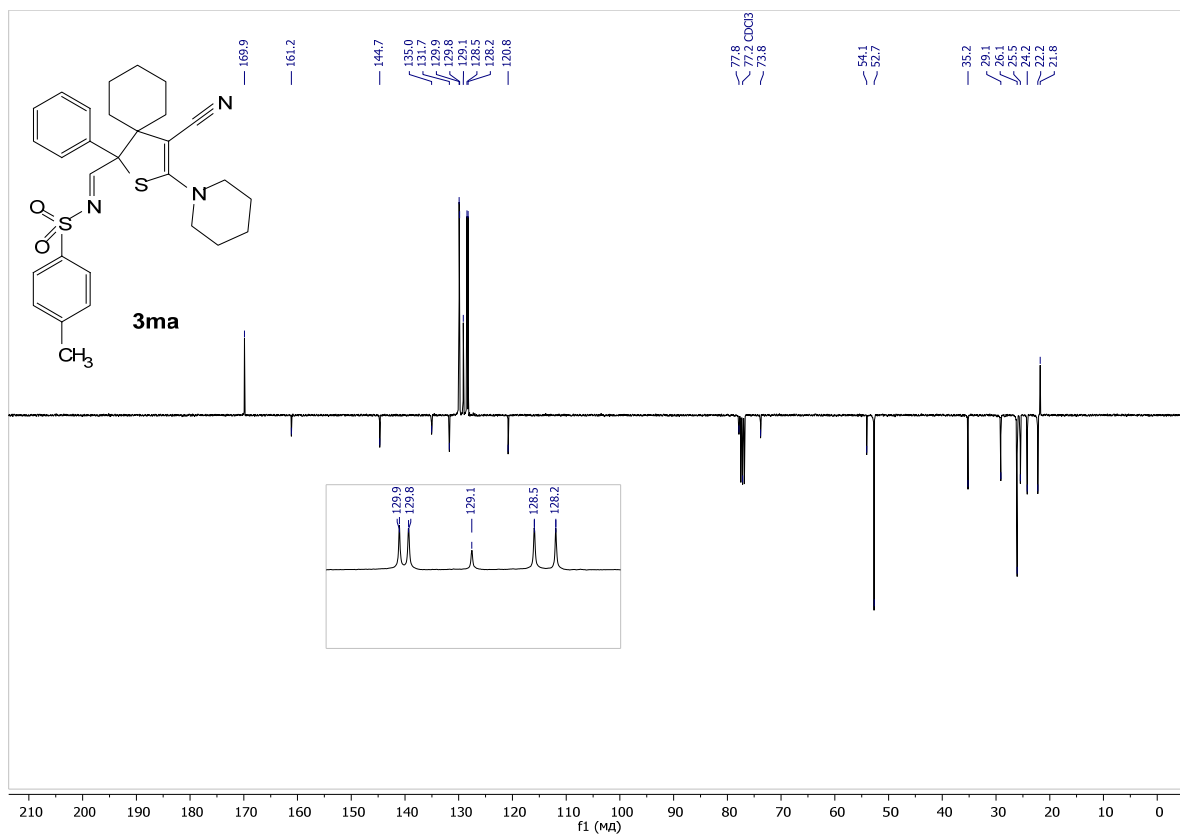

$^{13}\text{C}$  { $^1\text{H}$ } NMR (100 MHz,  $\text{CDCl}_3-d$ ) of **3ma**

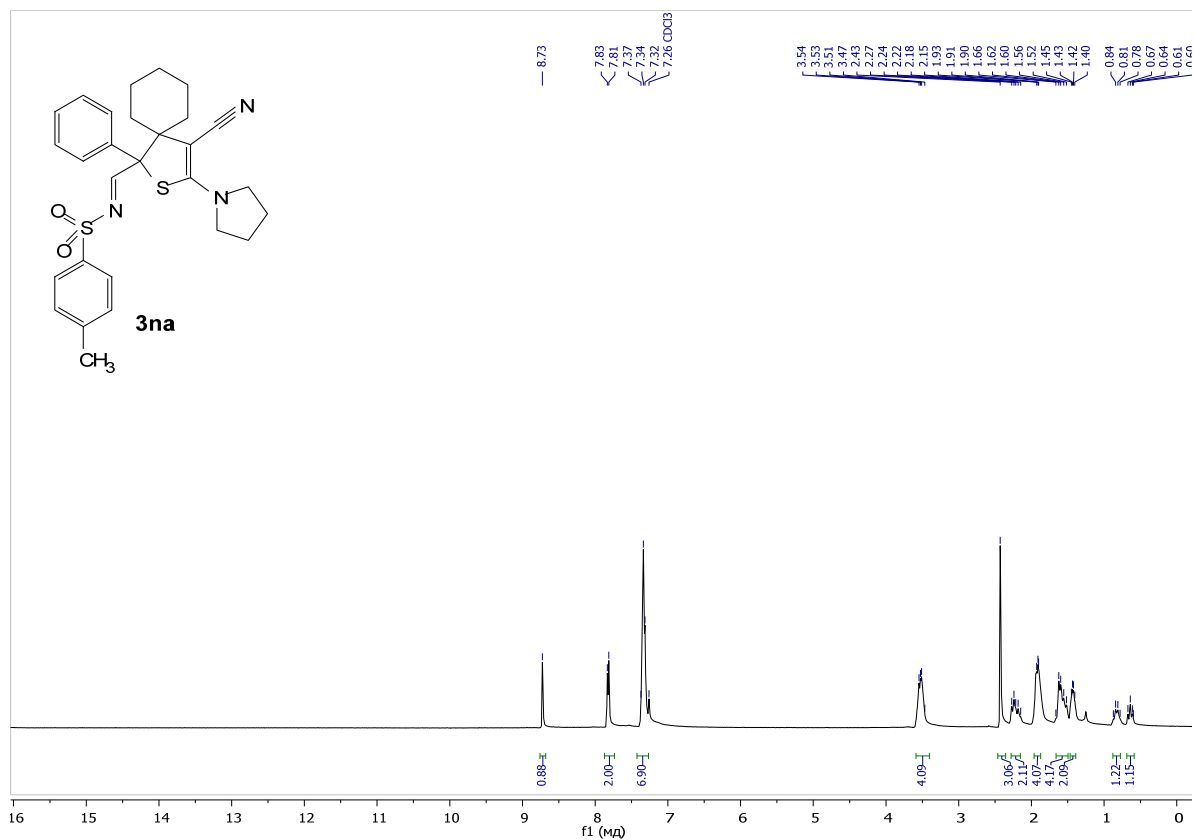

**<sup>1</sup>H NMR (400 MHz, CDCl<sub>3</sub>-d) of 3na**

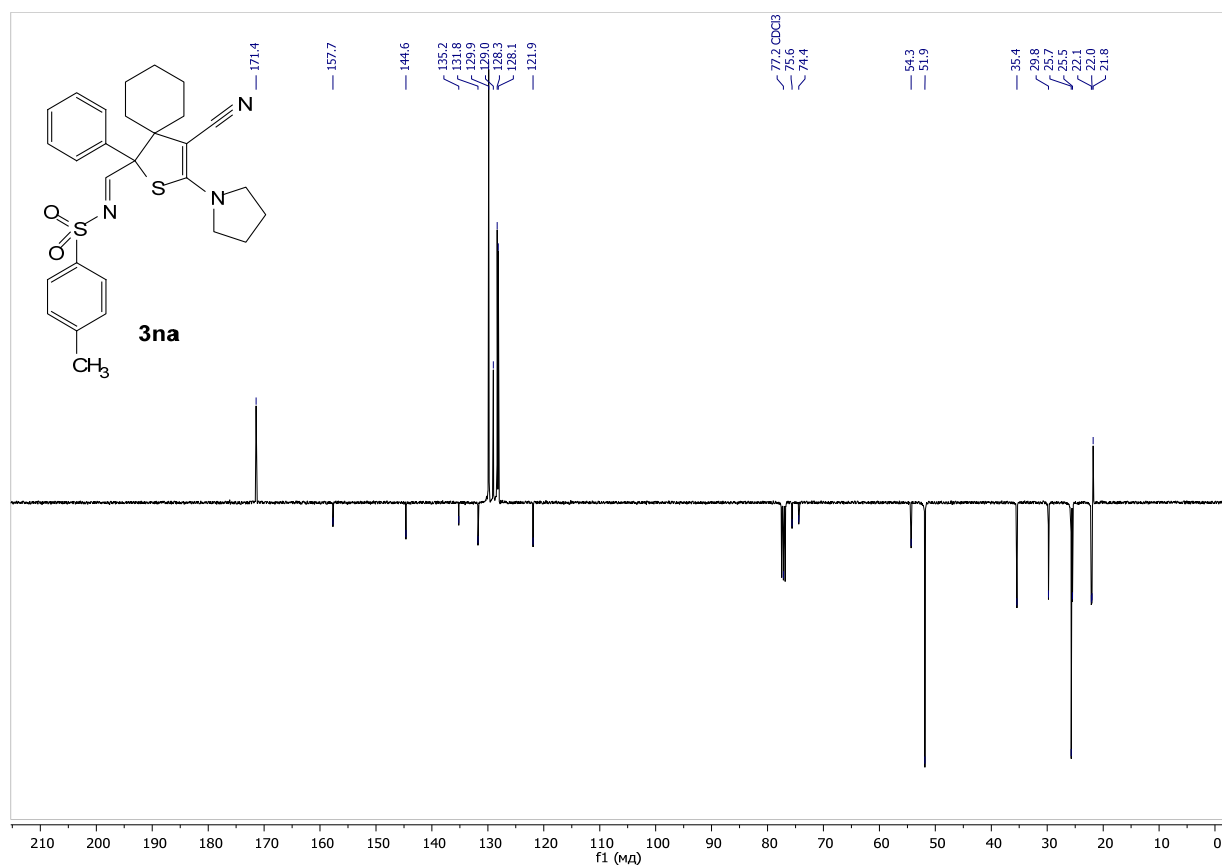

**<sup>13</sup>C {<sup>1</sup>H} NMR (100 MHz, CDCl<sub>3</sub>-d) of 3na**

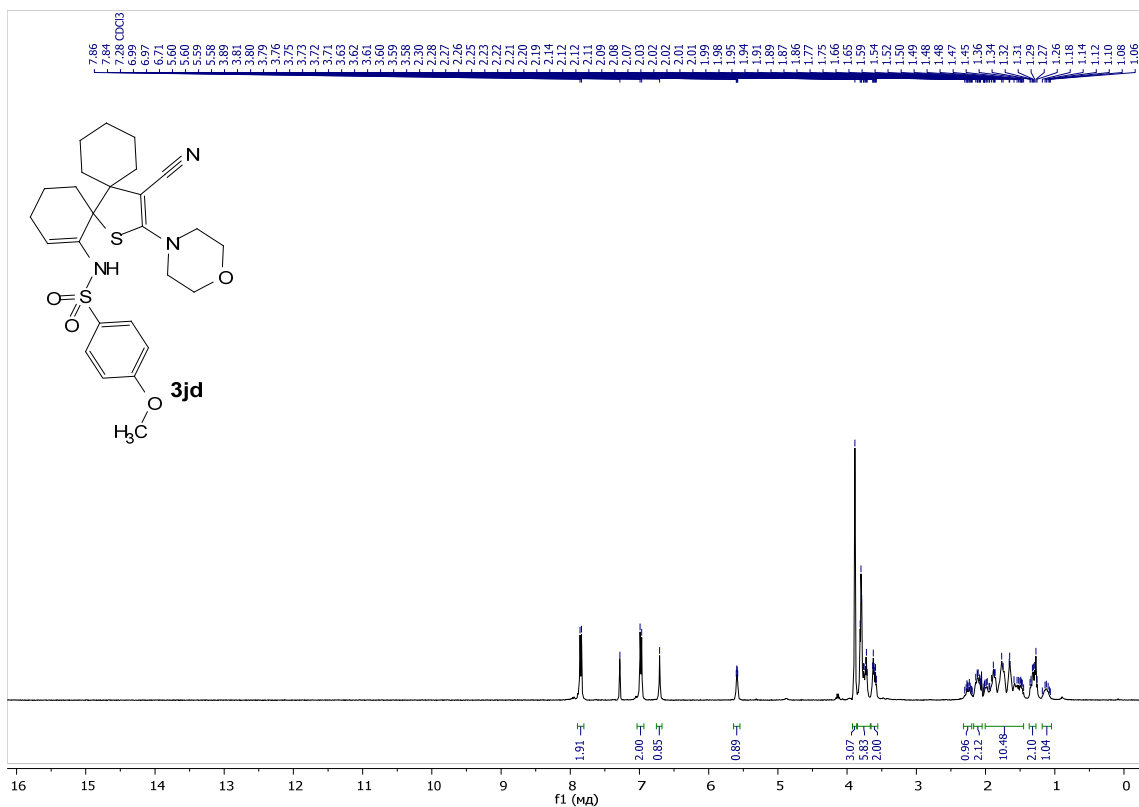

<sup>1</sup>H NMR (400 MHz, CDCl<sub>3</sub>-d) of **3jd**

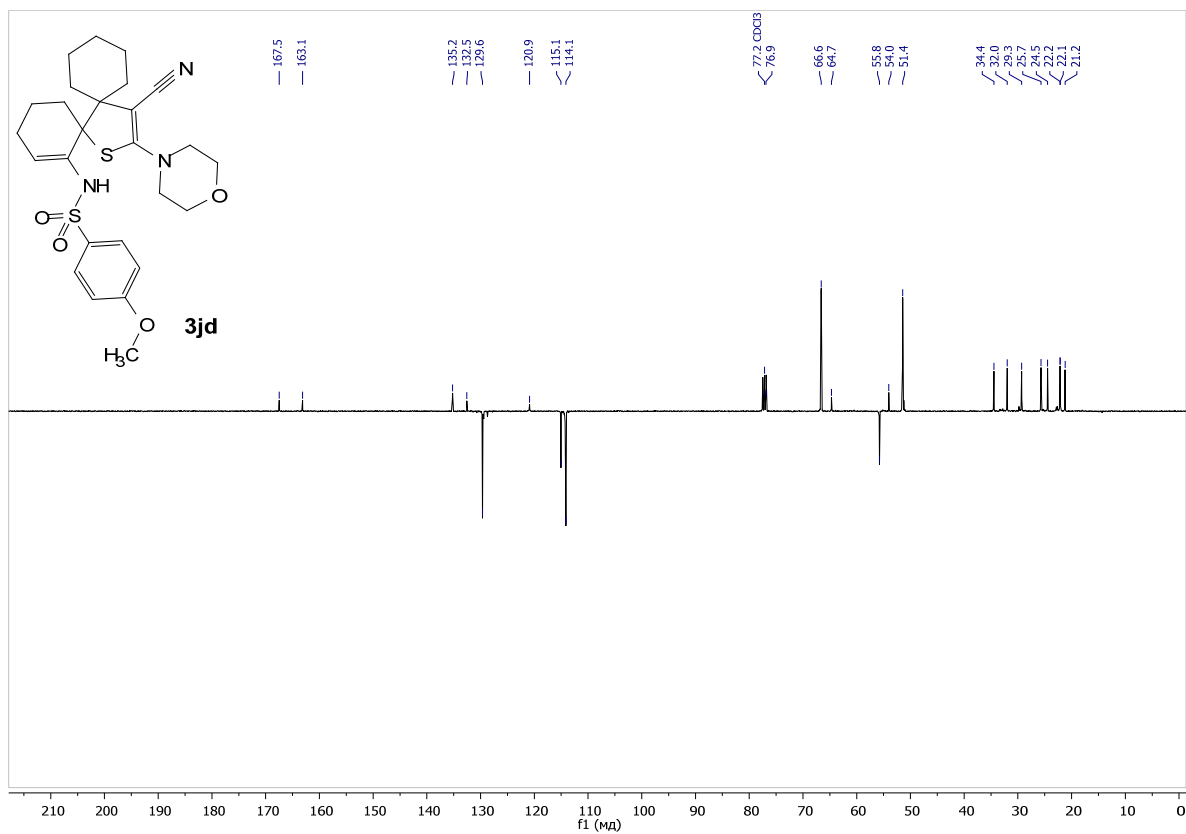

<sup>13</sup>C {<sup>1</sup>H} NMR (100 MHz, CDCl<sub>3</sub>-d) of **3jd**

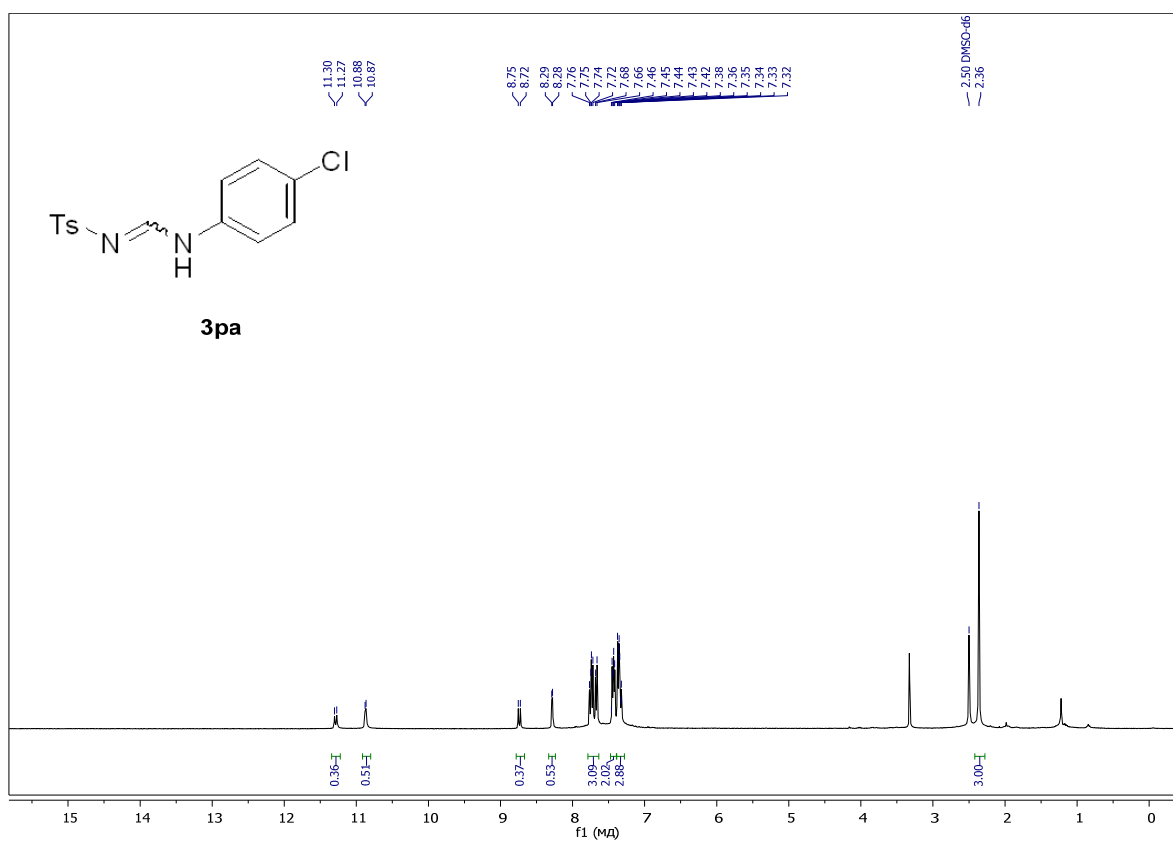

$^1\text{H NMR}$  (400 MHz,  $\text{DMSO-}d_6$ ) of **3ta**

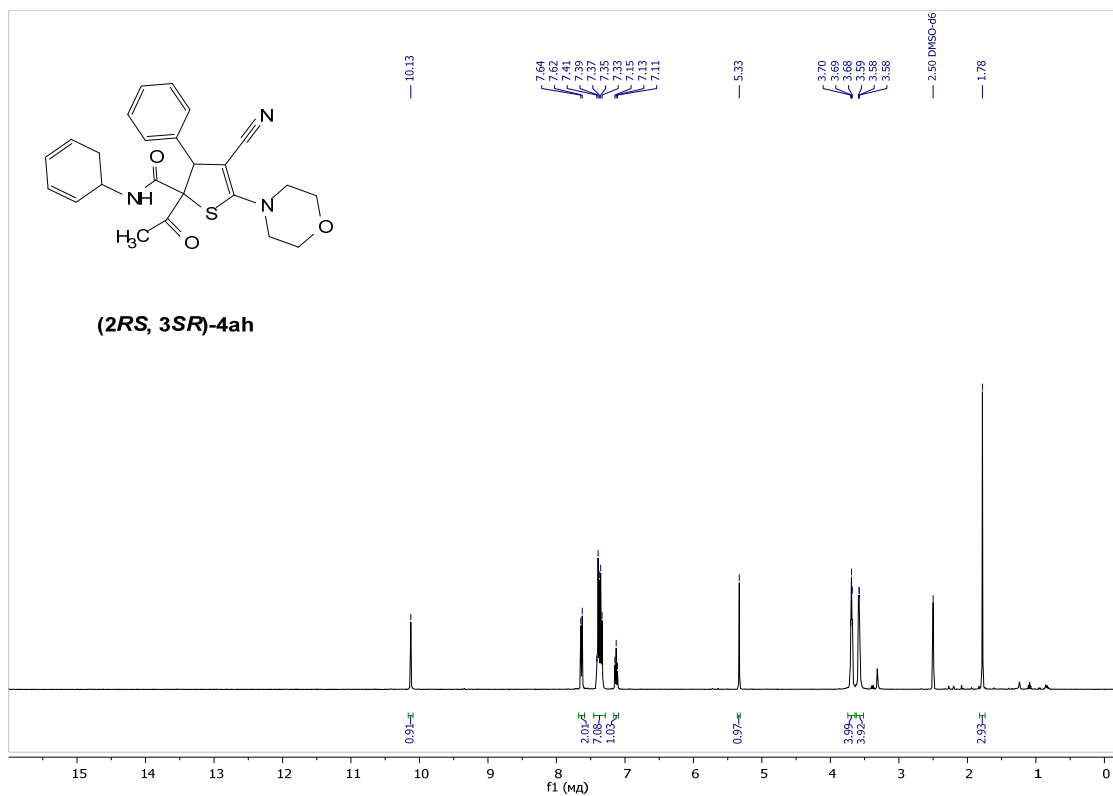

$^1\text{H}$  NMR (400 MHz,  $\text{DMSO}-d_6$ ) of **(2RS,3SR)-4ah**

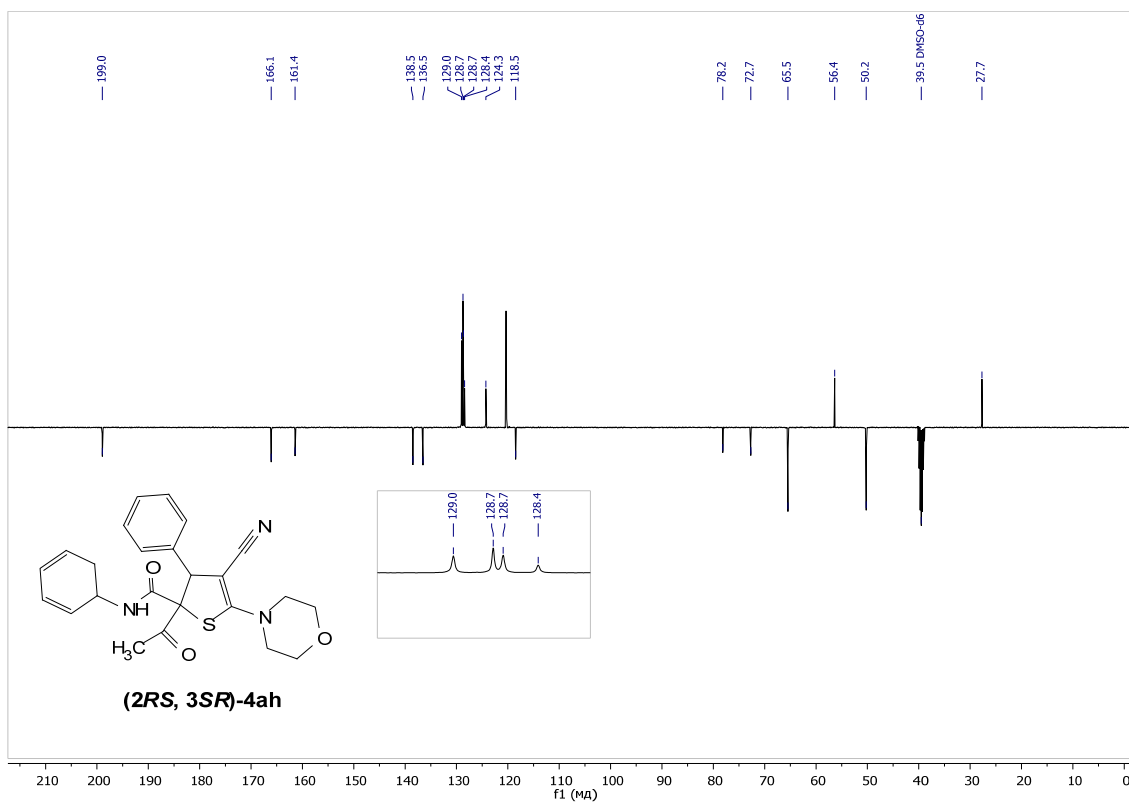

$^{13}\text{C}$  { $^1\text{H}$ } NMR (100 MHz,  $\text{DMSO}-d_6$ ) of **(2RS,3SR)-4ah**

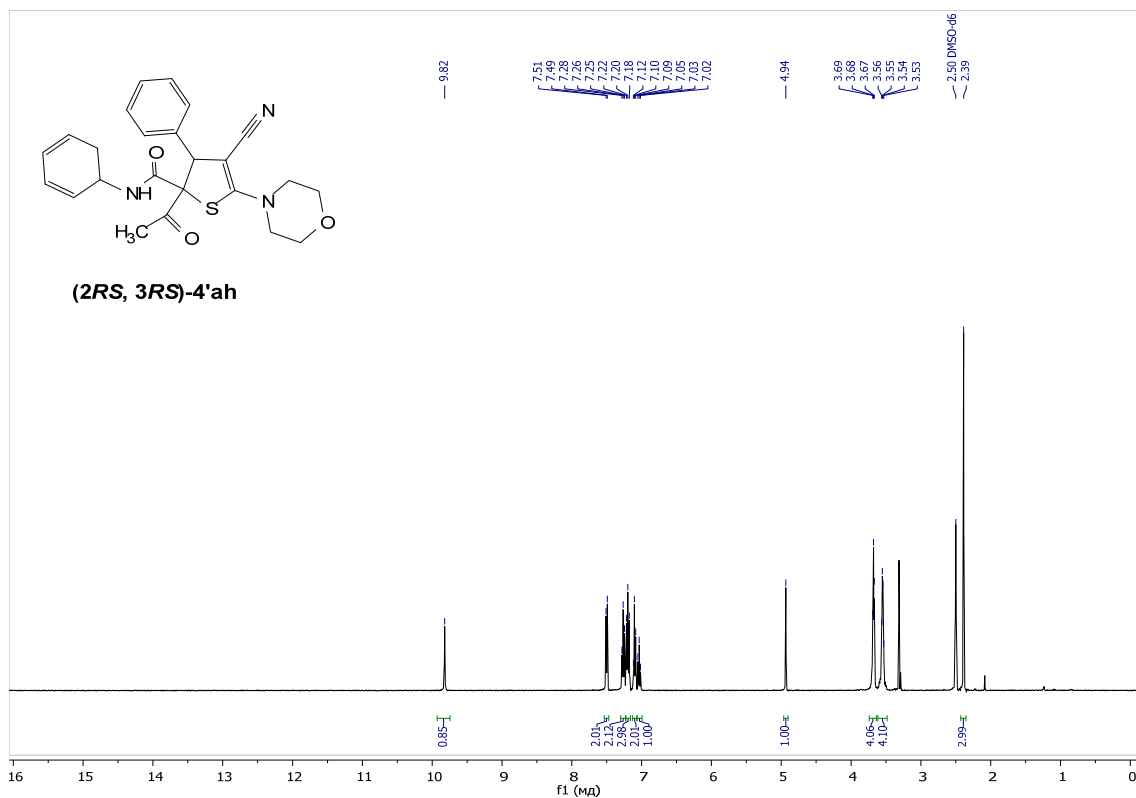

<sup>1</sup>H NMR (400 MHz, DMSO-*d*<sub>6</sub>) of **(2RS,3RS)-4'ah**

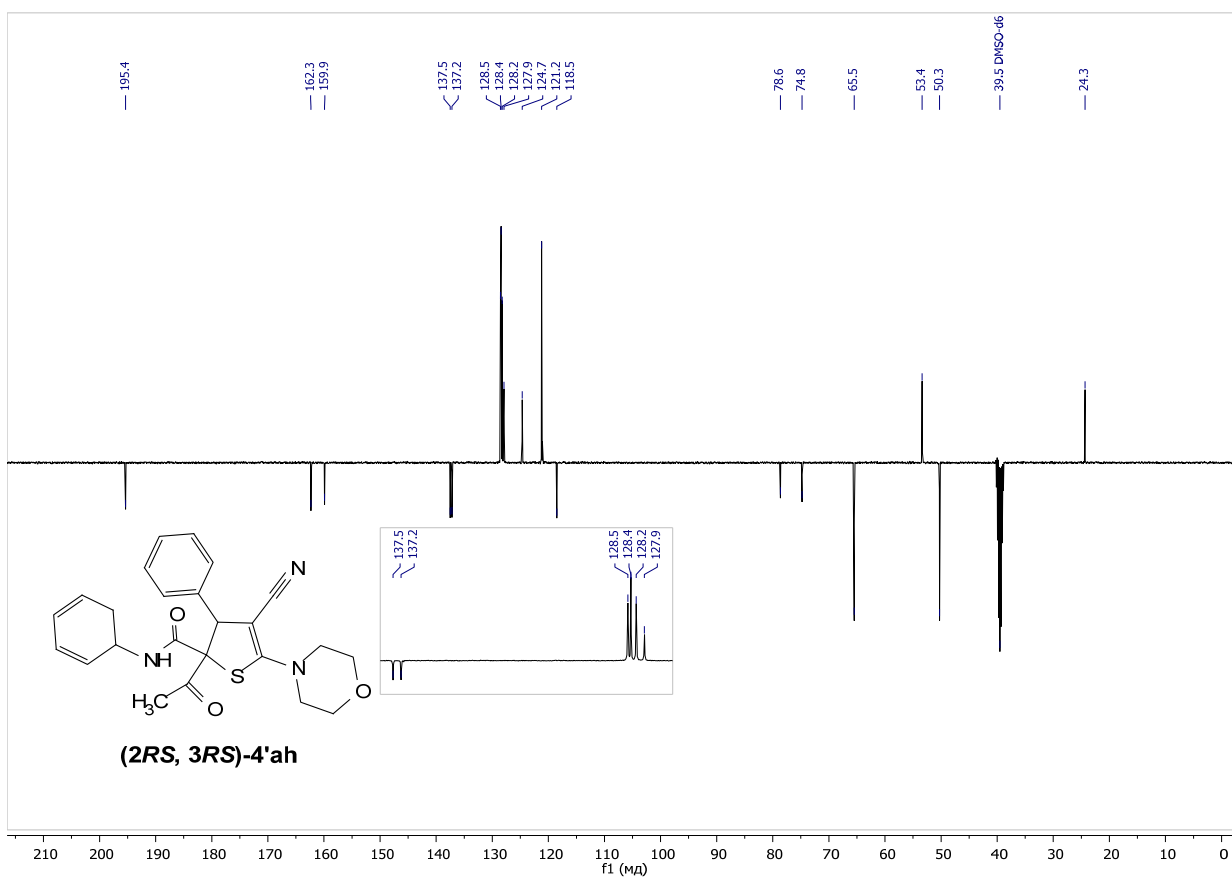

<sup>13</sup>C {<sup>1</sup>H} NMR (100 MHz, DMSO-*d*<sub>6</sub>) of **(2RS,3RS)-4'ah**



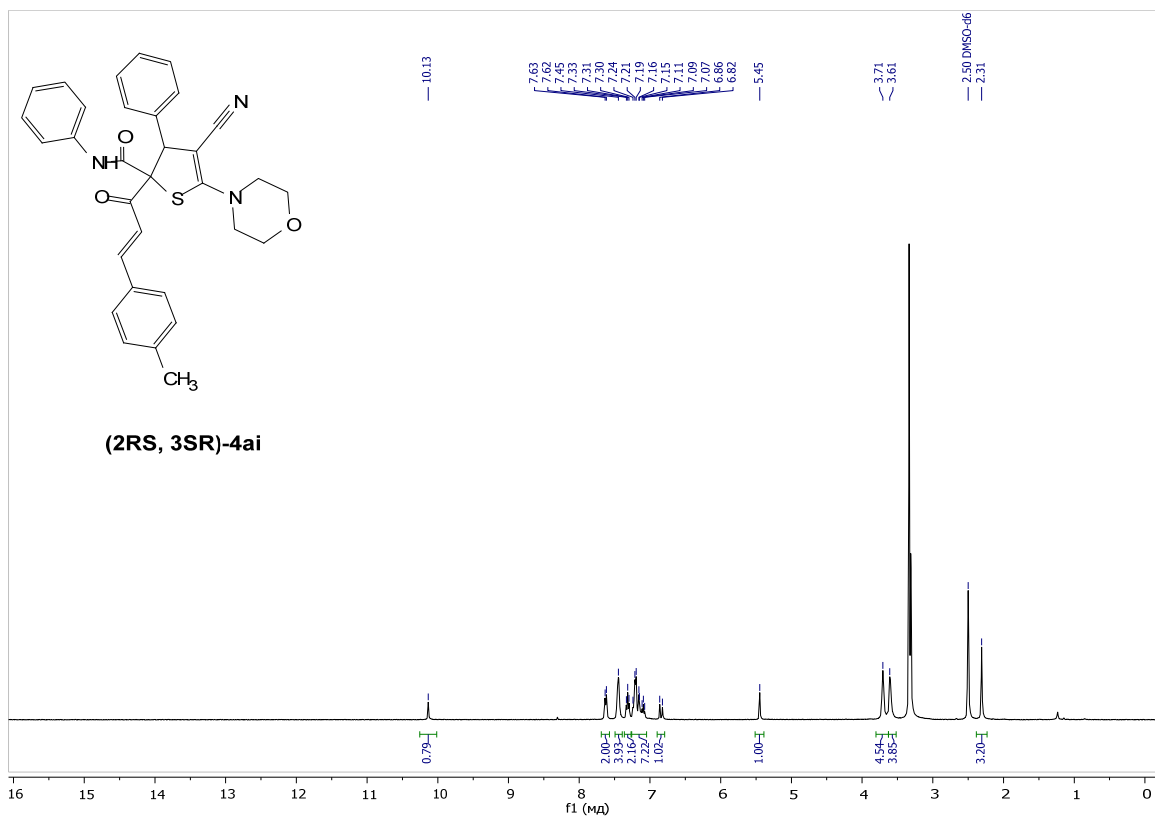

<sup>1</sup>H NMR (400 MHz, DMSO-*d*<sub>6</sub>) of **(2RS,3SR)-4ai**

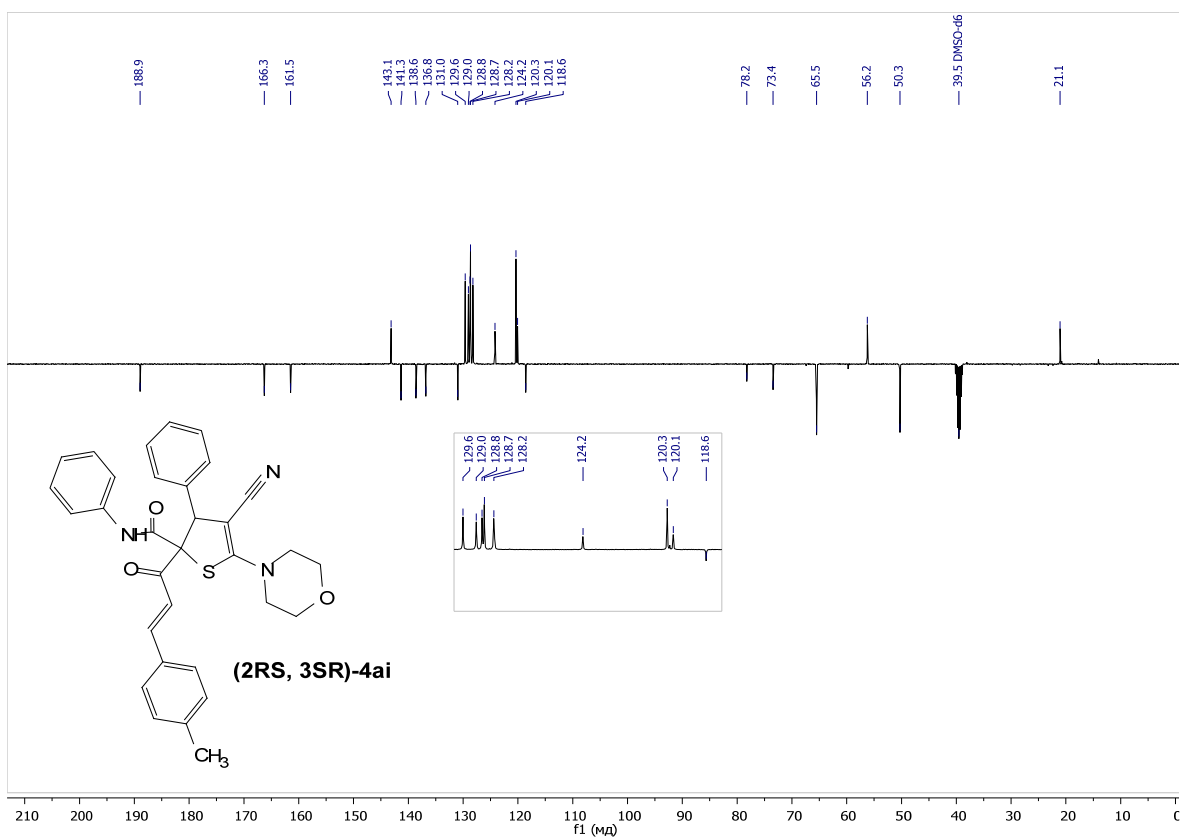

<sup>13</sup>C{<sup>1</sup>H} NMR (100 MHz, DMSO-*d*<sub>6</sub>) of **(2RS,3SR)-4ai**

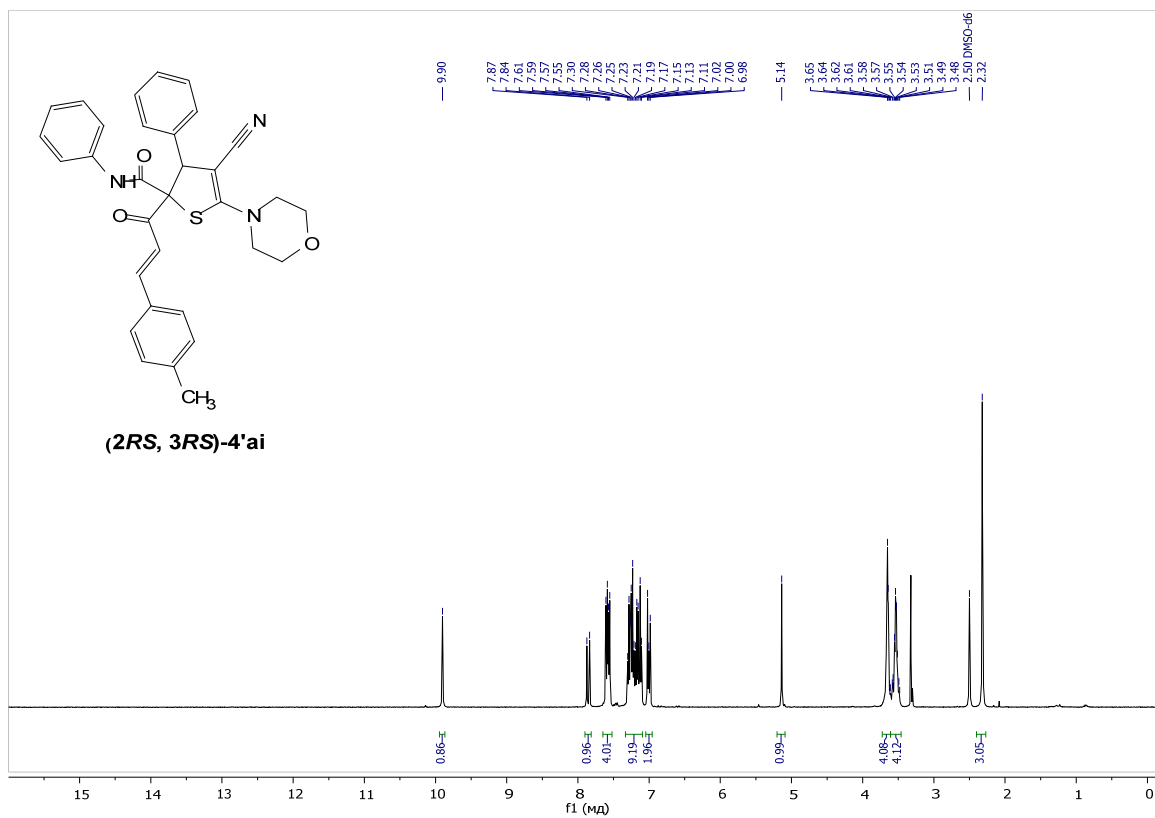

<sup>1</sup>H NMR (400 MHz, DMSO-*d*<sub>6</sub>) of (2RS,3RS)-4'ai

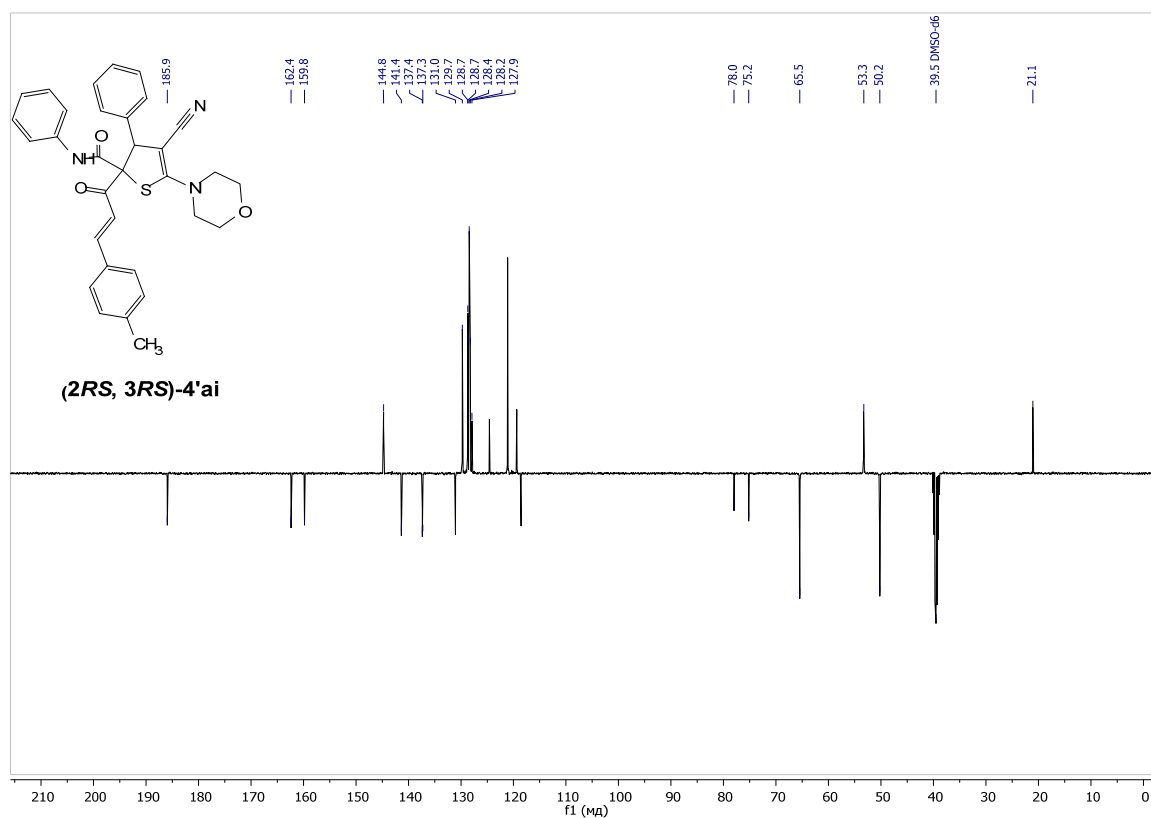

<sup>13</sup>C {<sup>1</sup>H} NMR (100 MHz, DMSO-*d*<sub>6</sub>) of (2RS,3RS)-4'ai

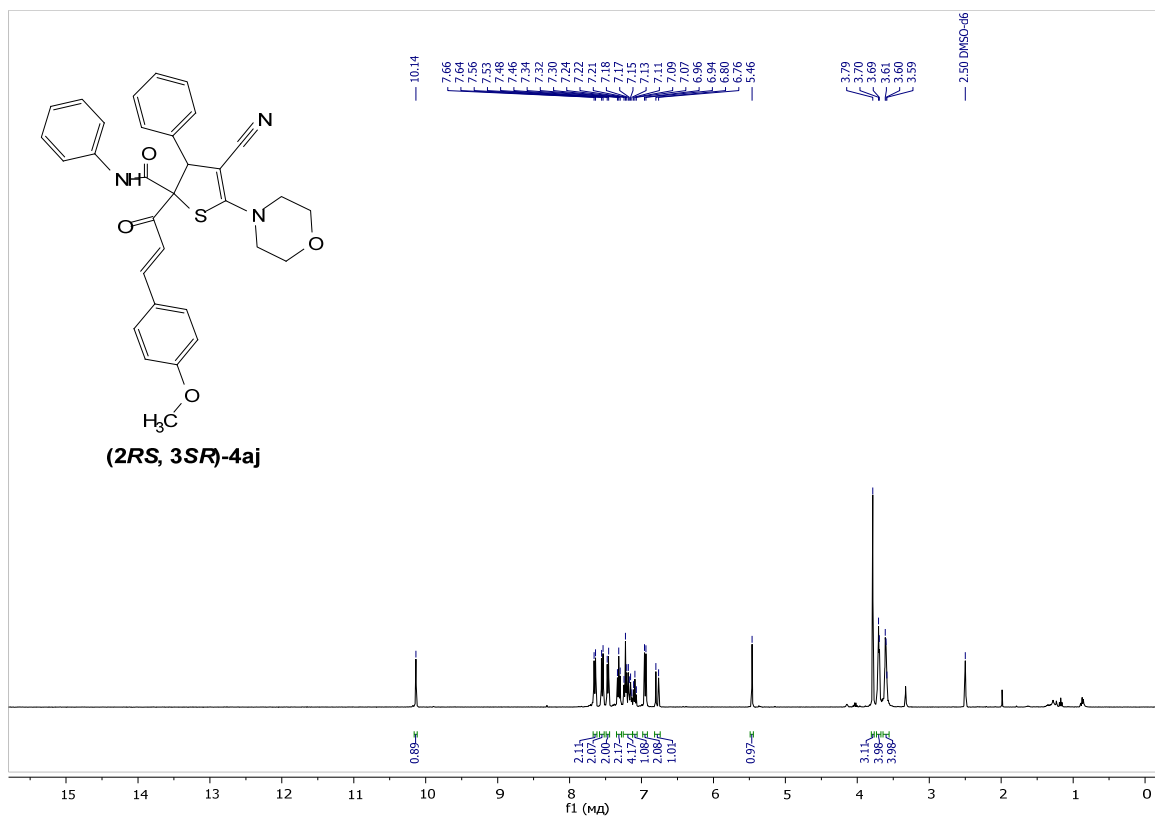

<sup>1</sup>H NMR (400 MHz, DMSO-*d*<sub>6</sub>) of **(2RS,3SR)-4aj**

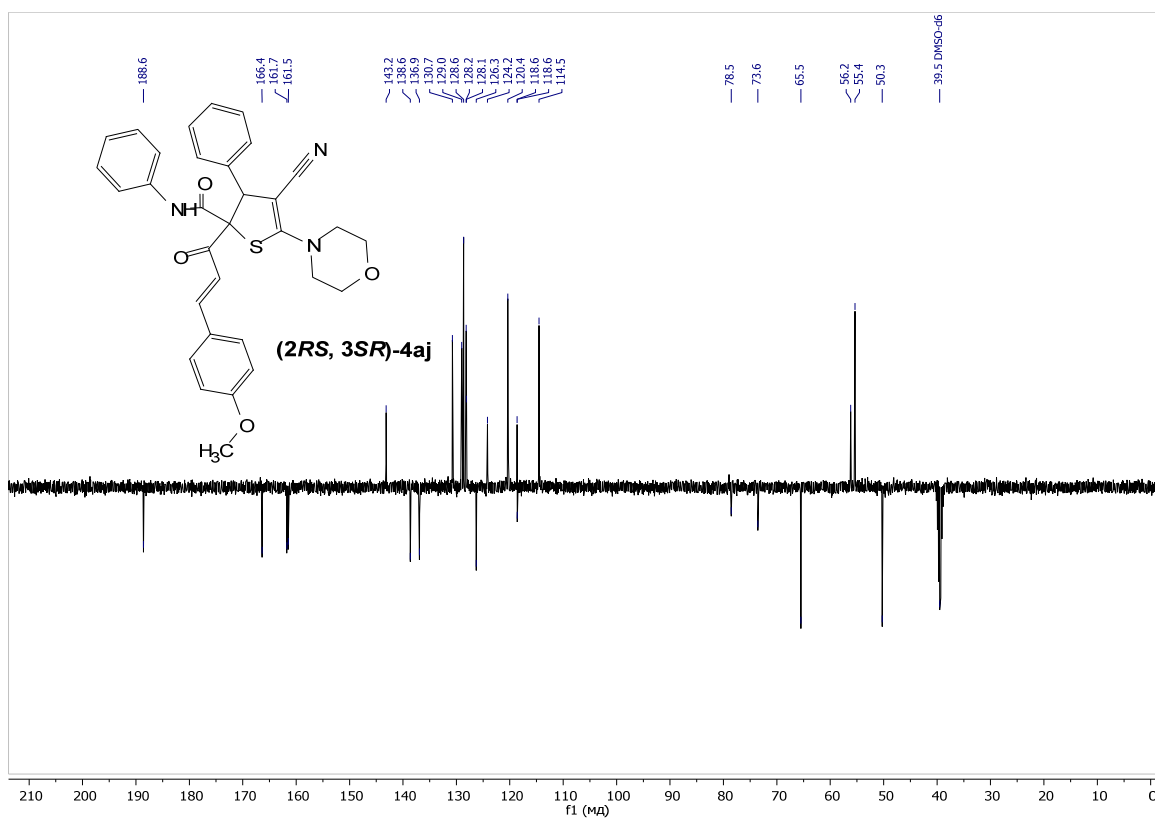

<sup>13</sup>C {<sup>1</sup>H} NMR (100 MHz, DMSO-*d*<sub>6</sub>) of **(2RS,3SR)-4aj**

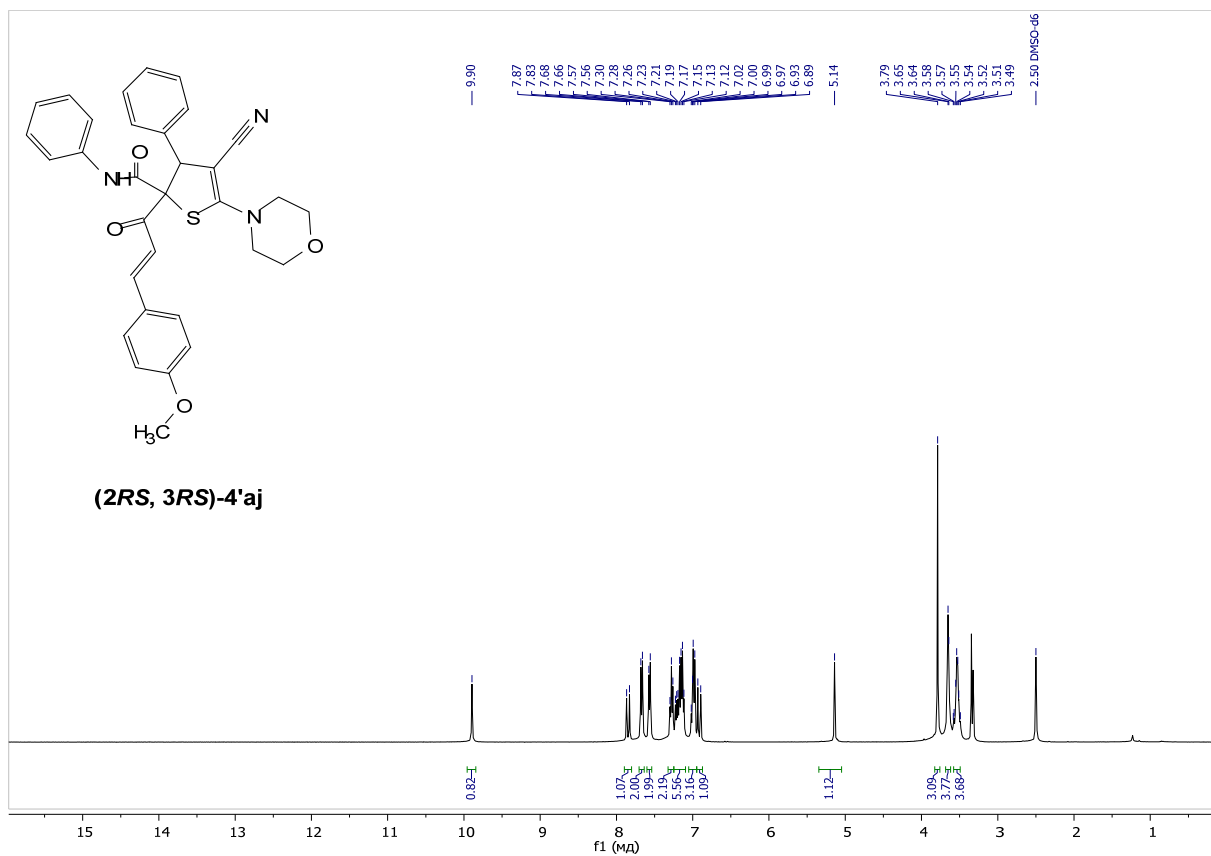

<sup>1</sup>H NMR (400 MHz, DMSO-*d*<sub>6</sub>) of (2RS,3RS)-4'aj

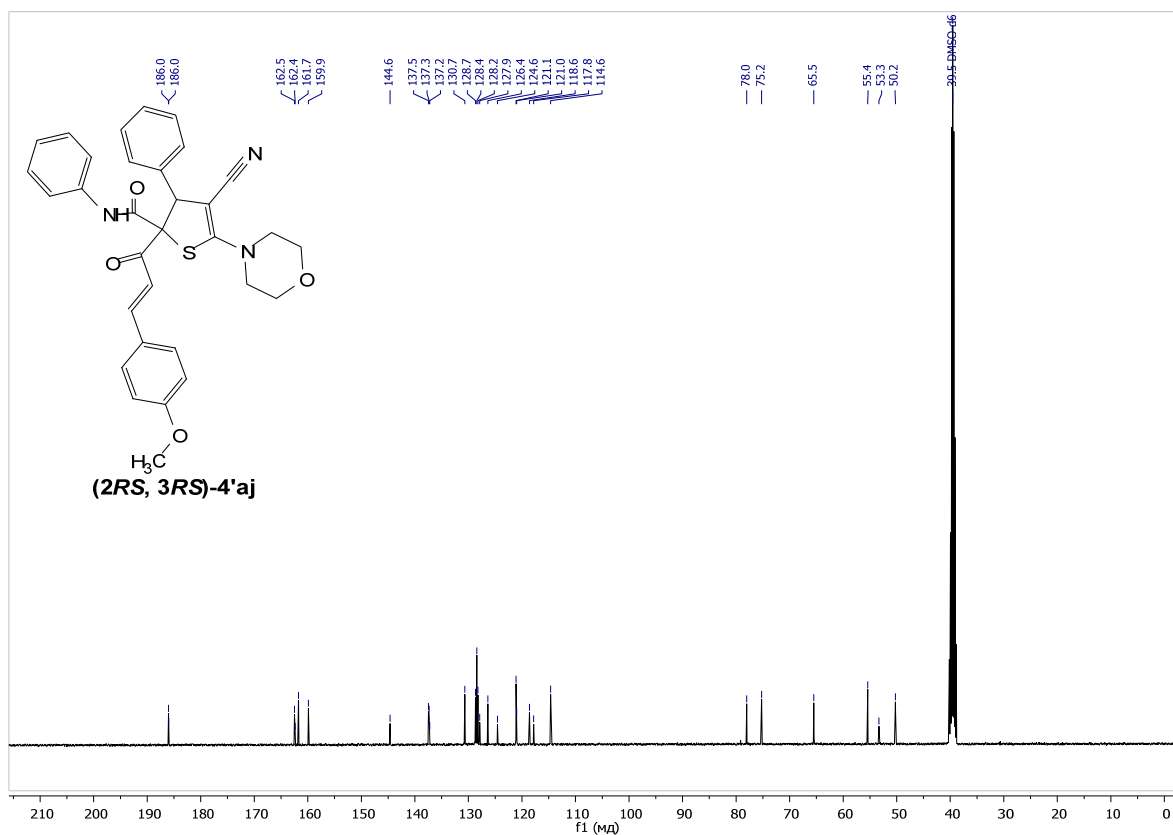

<sup>13</sup>C {<sup>1</sup>H} NMR (100 MHz, DMSO-*d*<sub>6</sub>) of (2RS,3RS)-4'aj

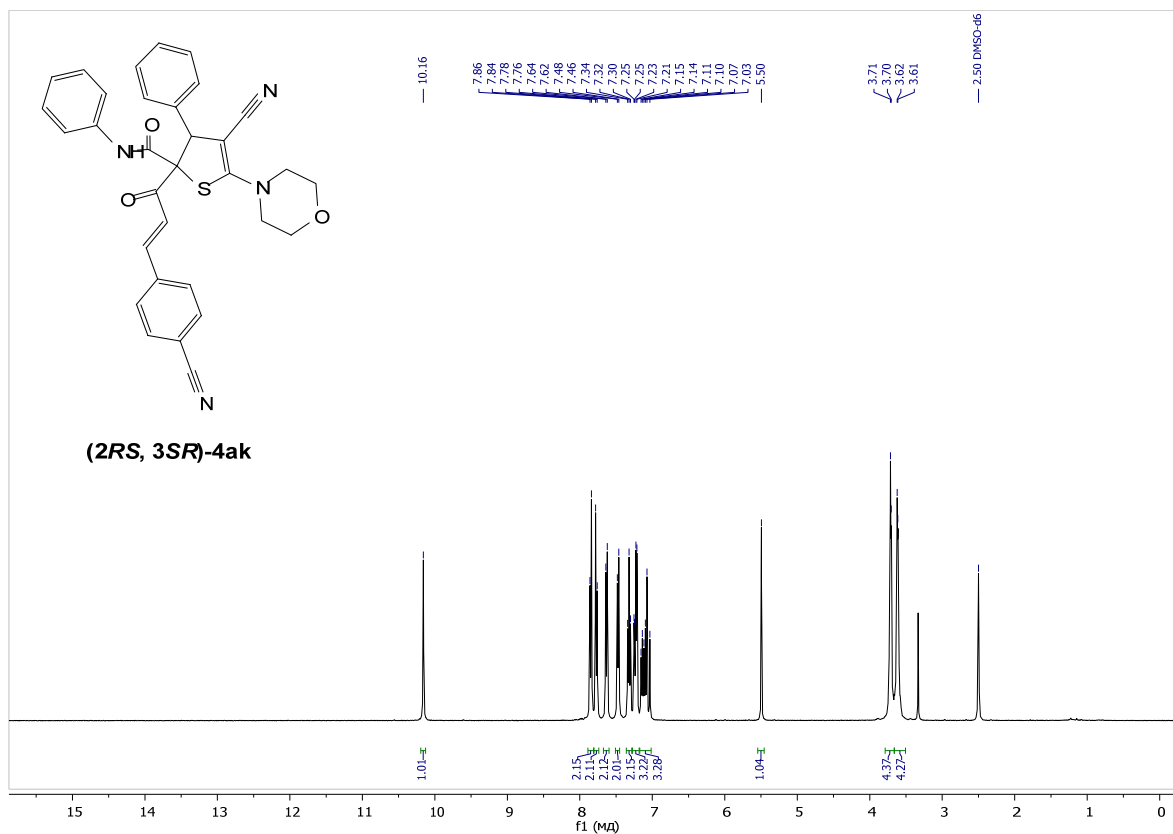

$^1\text{H}$  NMR (400 MHz, DMSO- $d_6$ ) of **(2RS,3SR)-4ak**

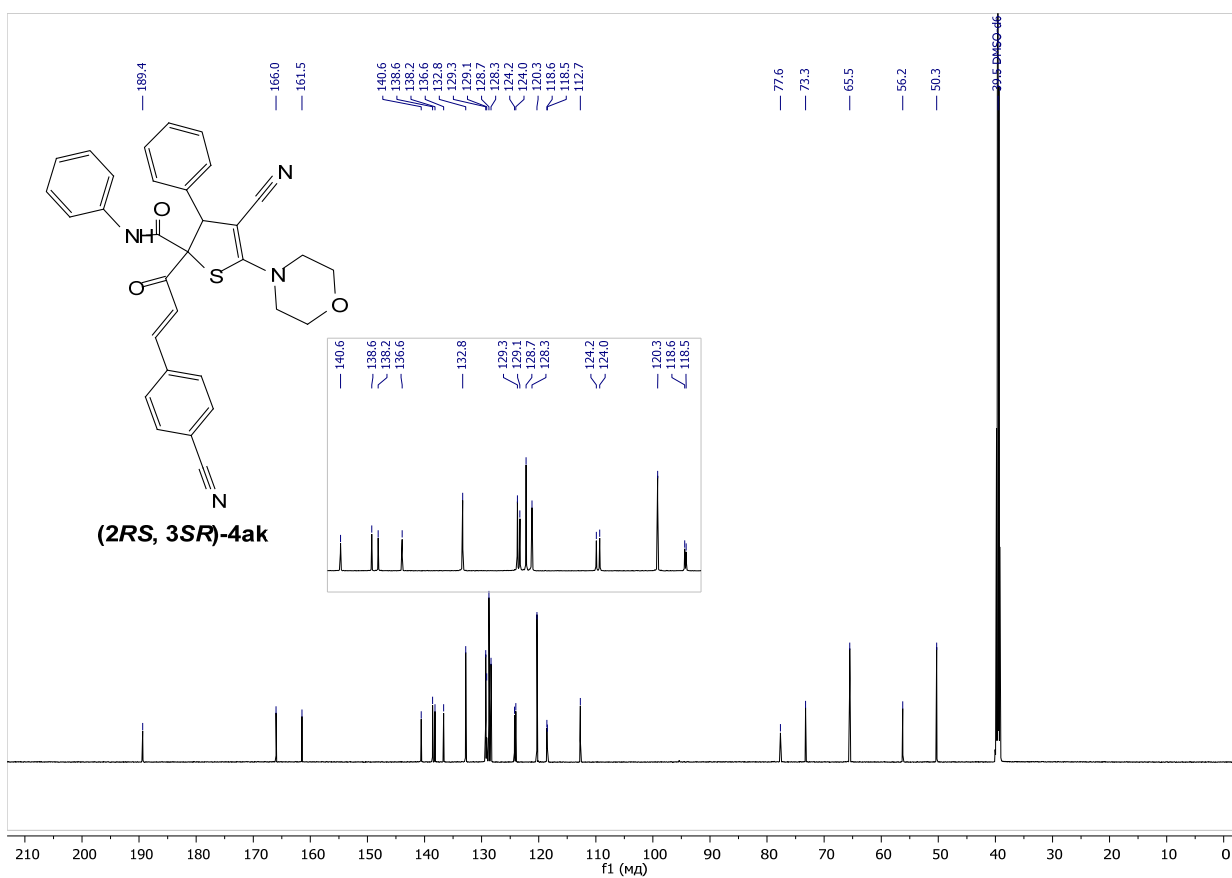

$^{13}\text{C}$  { $^1\text{H}$ } NMR (150 MHz, DMSO- $d_6$ ) of **(2RS,3SR)-4ak**

1082  
Ilkin G11dz2

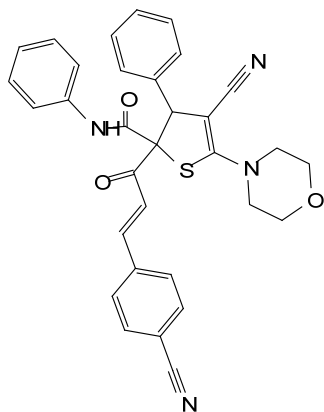

(2*RS*, 3*RS*)-4'*ak*

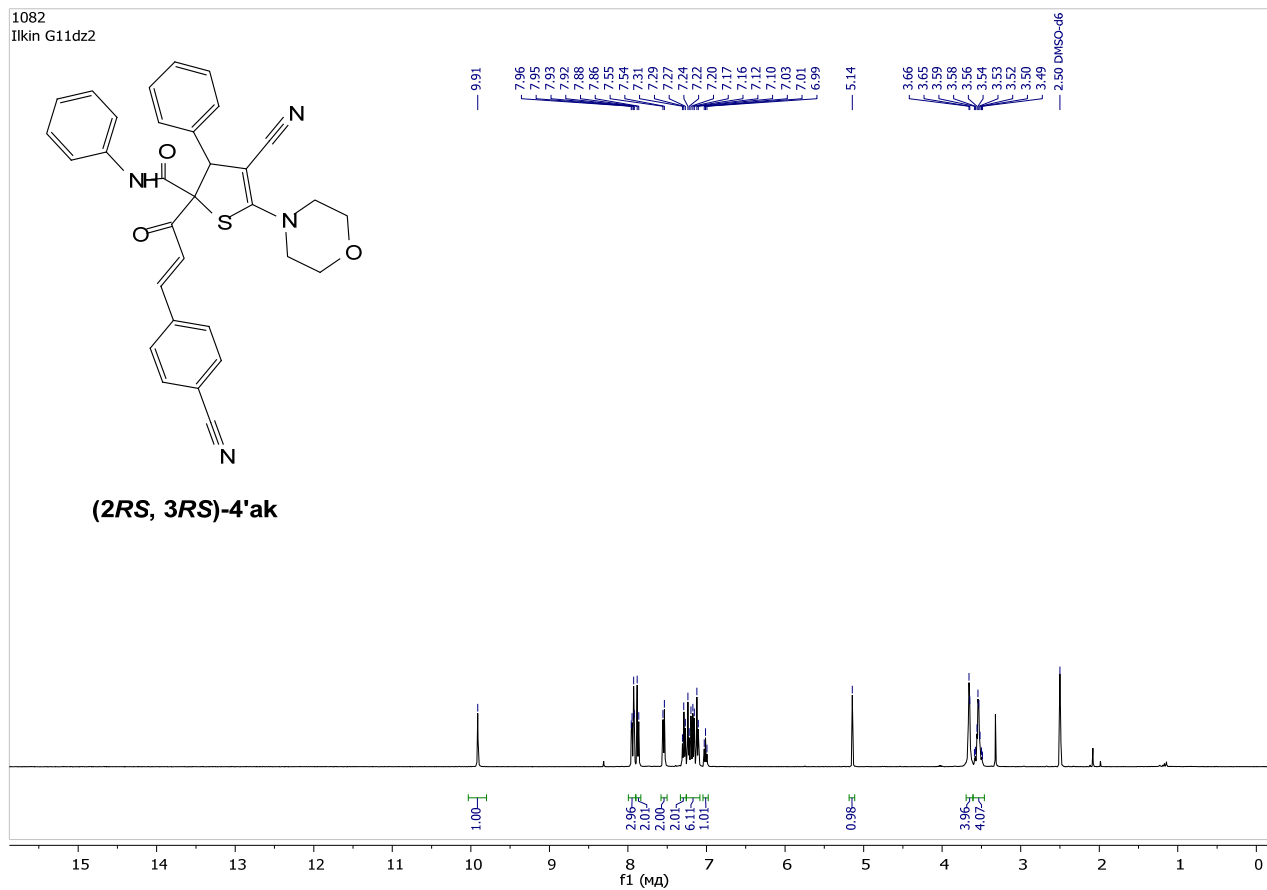

<sup>1</sup>H NMR (400 MHz, DMSO-*d*<sub>6</sub>) of (2*RS*,3*RS*)-4'*ak*

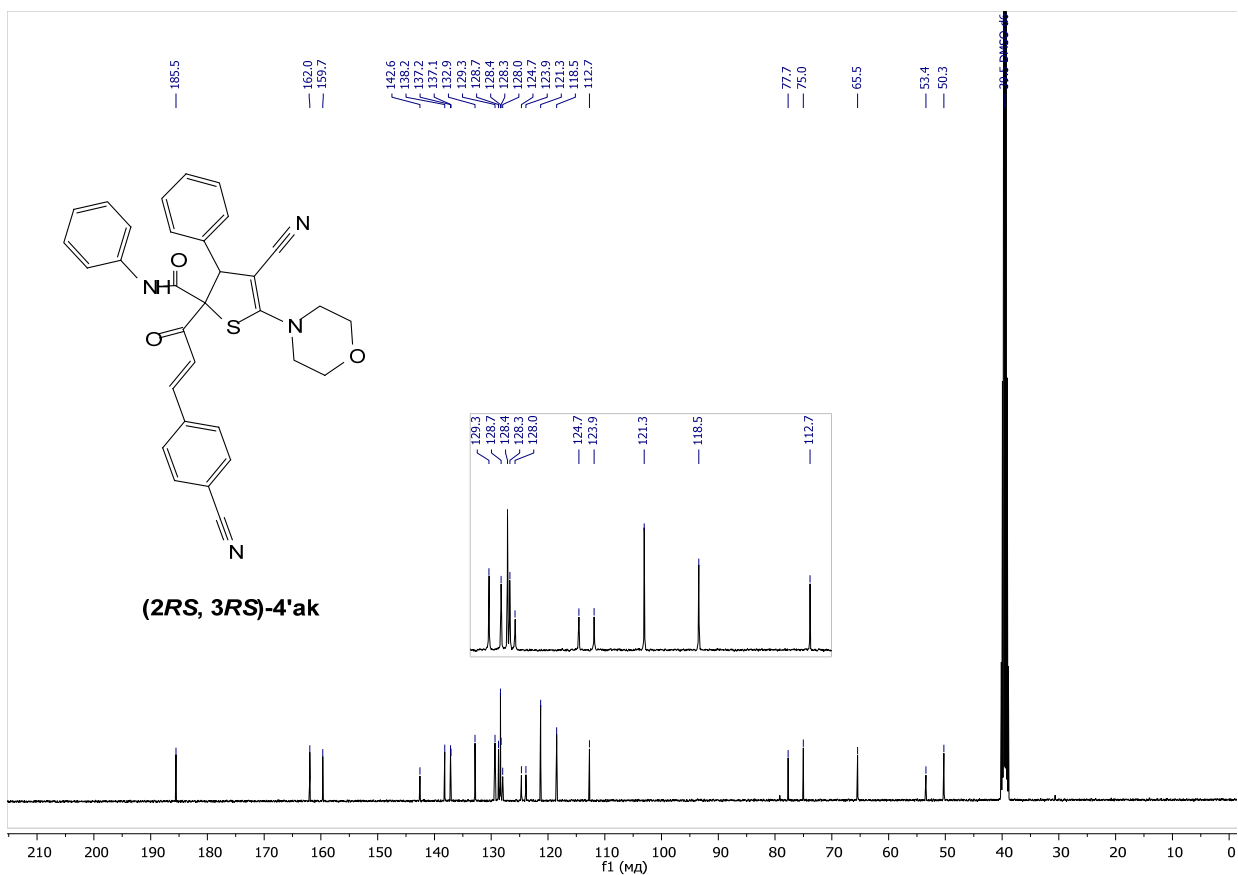

<sup>13</sup>C {<sup>1</sup>H} NMR (100 MHz, DMSO-*d*<sub>6</sub>) of (2*RS*,3*RS*)-4'*ak*

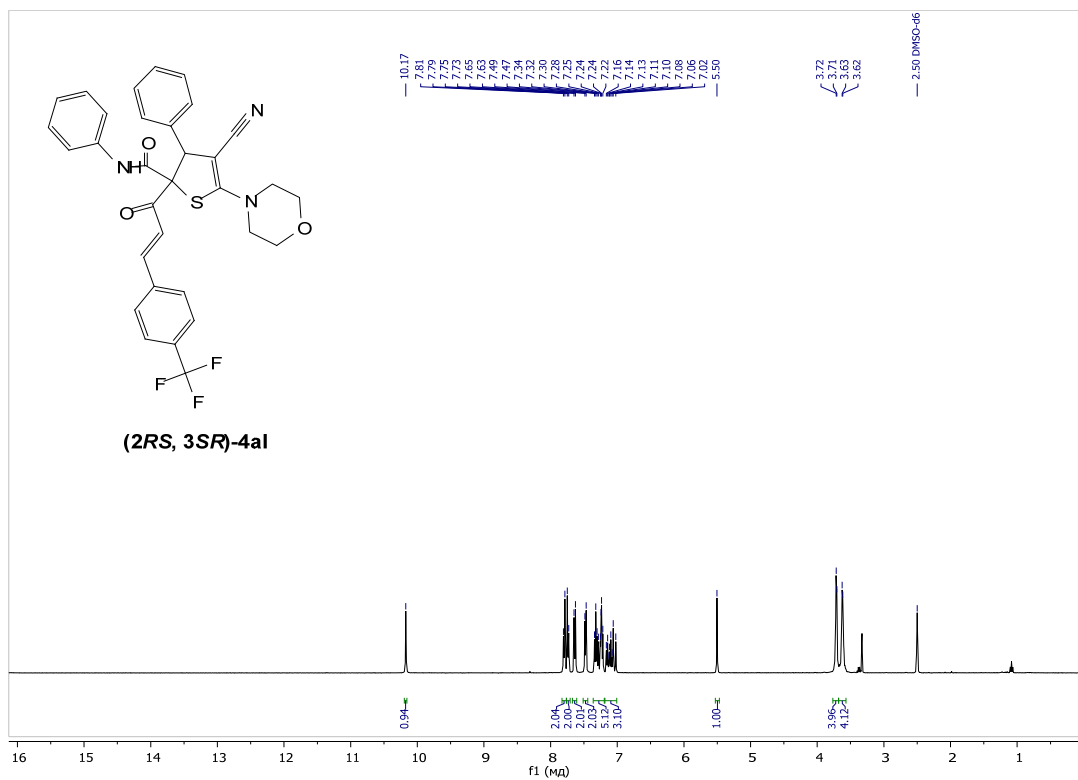

<sup>1</sup>H NMR (400 MHz, DMSO-*d*<sub>6</sub>) of **(2RS,3SR)-4al**

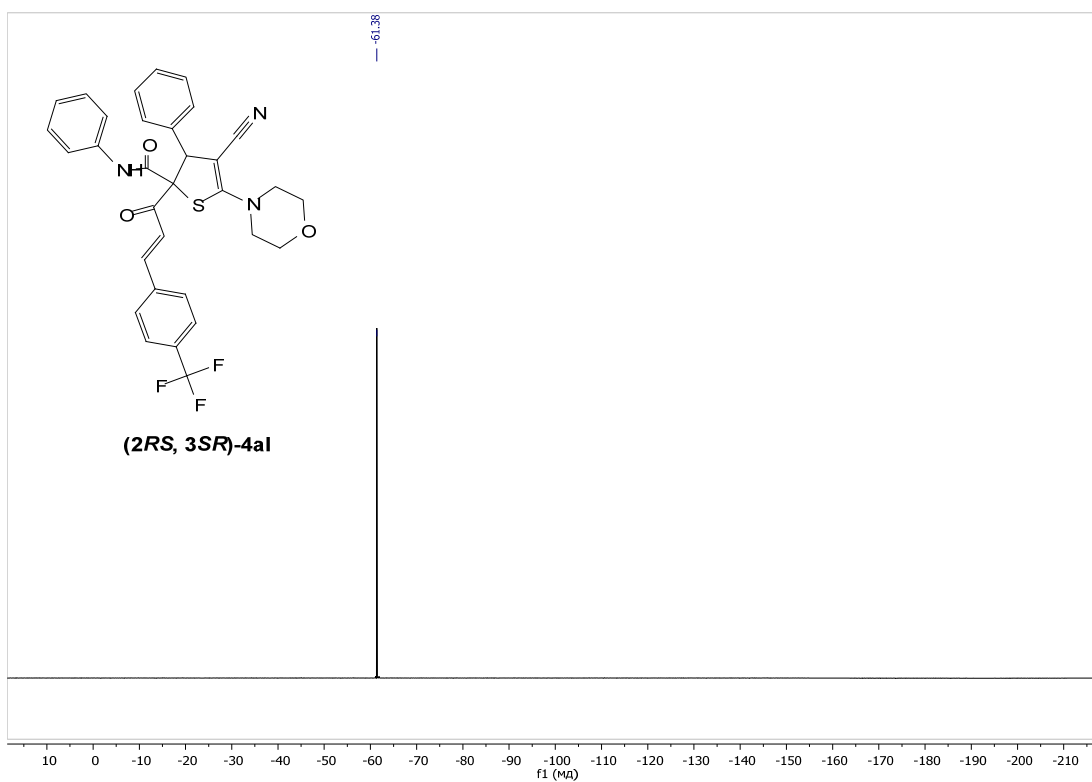

<sup>19</sup>F NMR (376 MHz, DMSO-*d*<sub>6</sub>) of **(2RS,3SR)-4al**

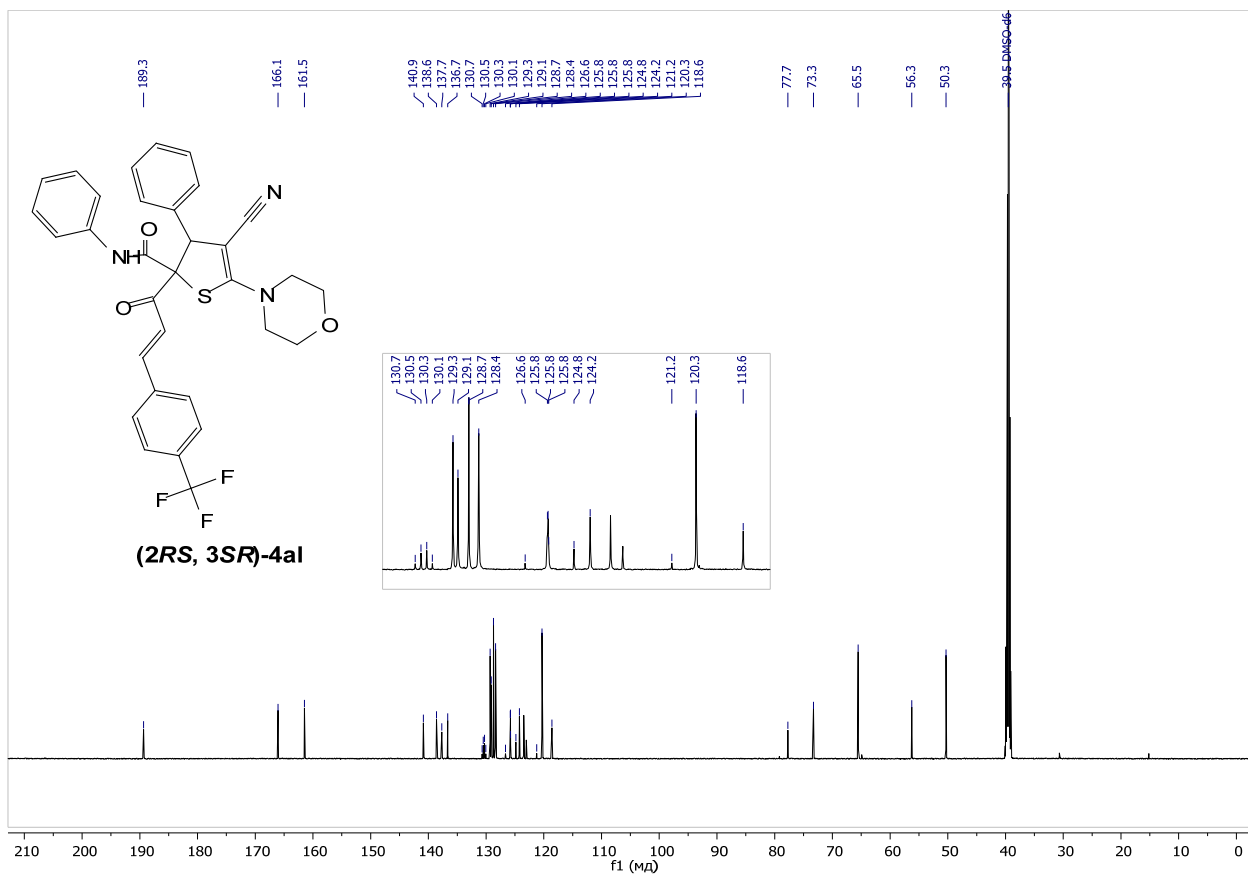

<sup>13</sup>C{<sup>1</sup>H} NMR (150 MHz, DMSO-*d*<sub>6</sub>) of (2*RS*,3*SR*)-4al



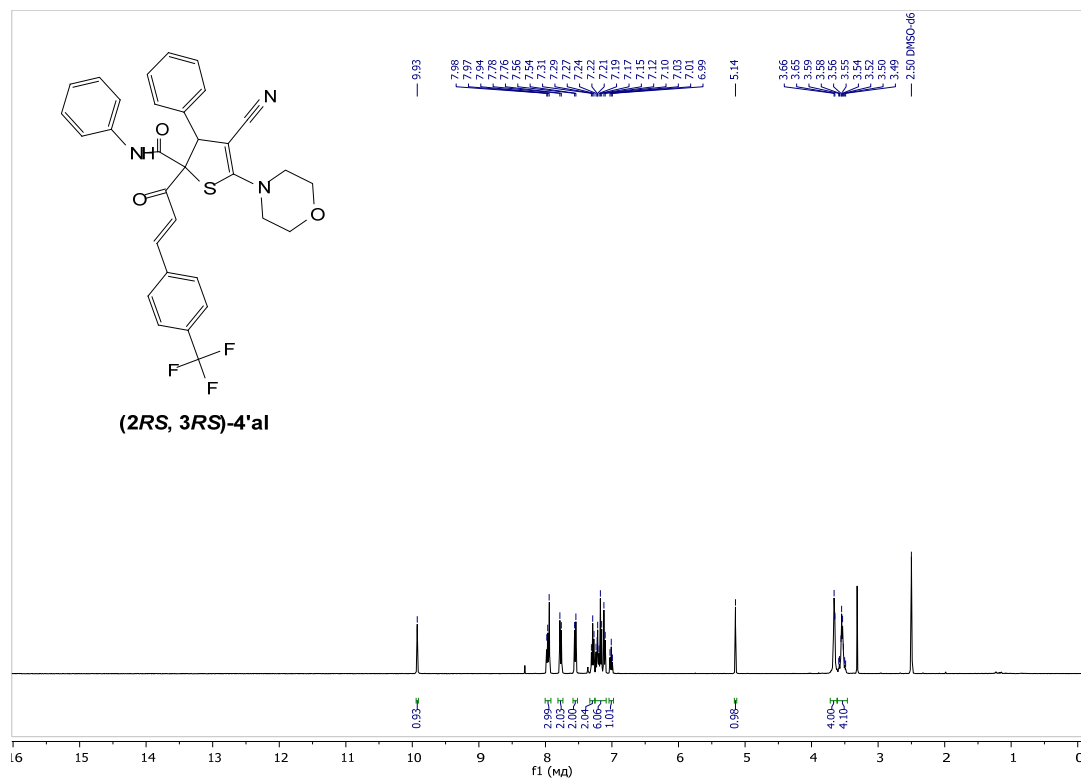

<sup>1</sup>H NMR (400 MHz, DMSO-*d*<sub>6</sub>) of (2RS,3RS)-4'al

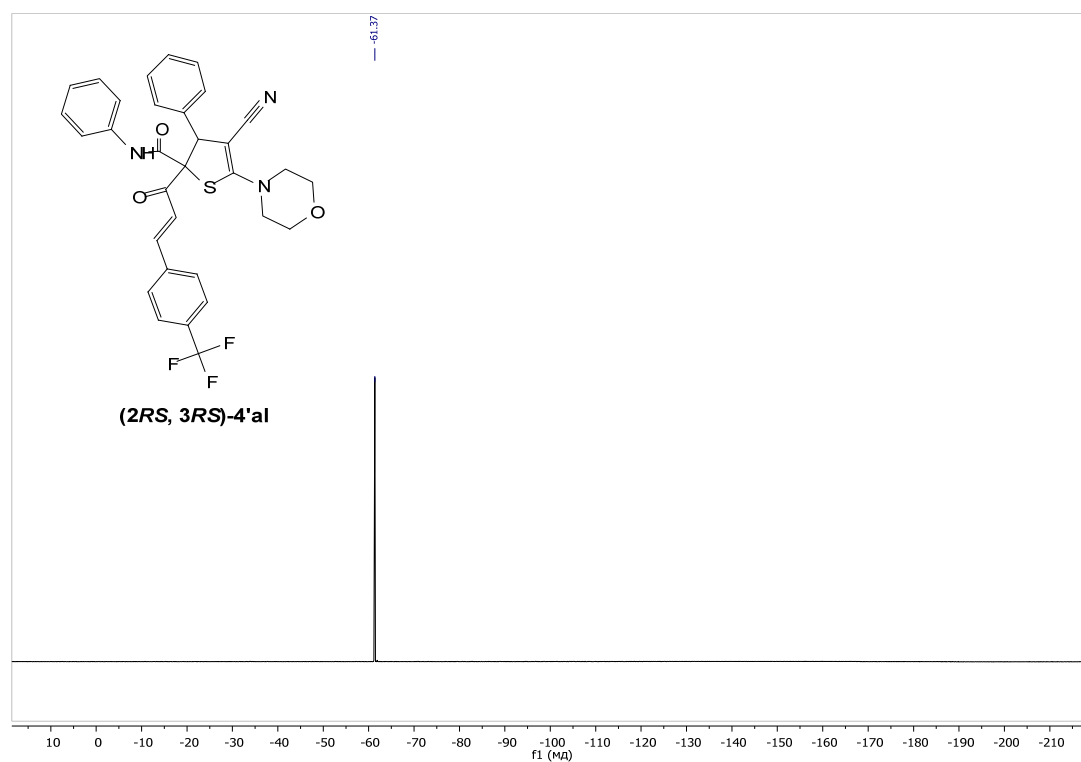

<sup>19</sup>F NMR (376 MHz, DMSO-*d*<sub>6</sub>) of (2RS,3RS)-4'al

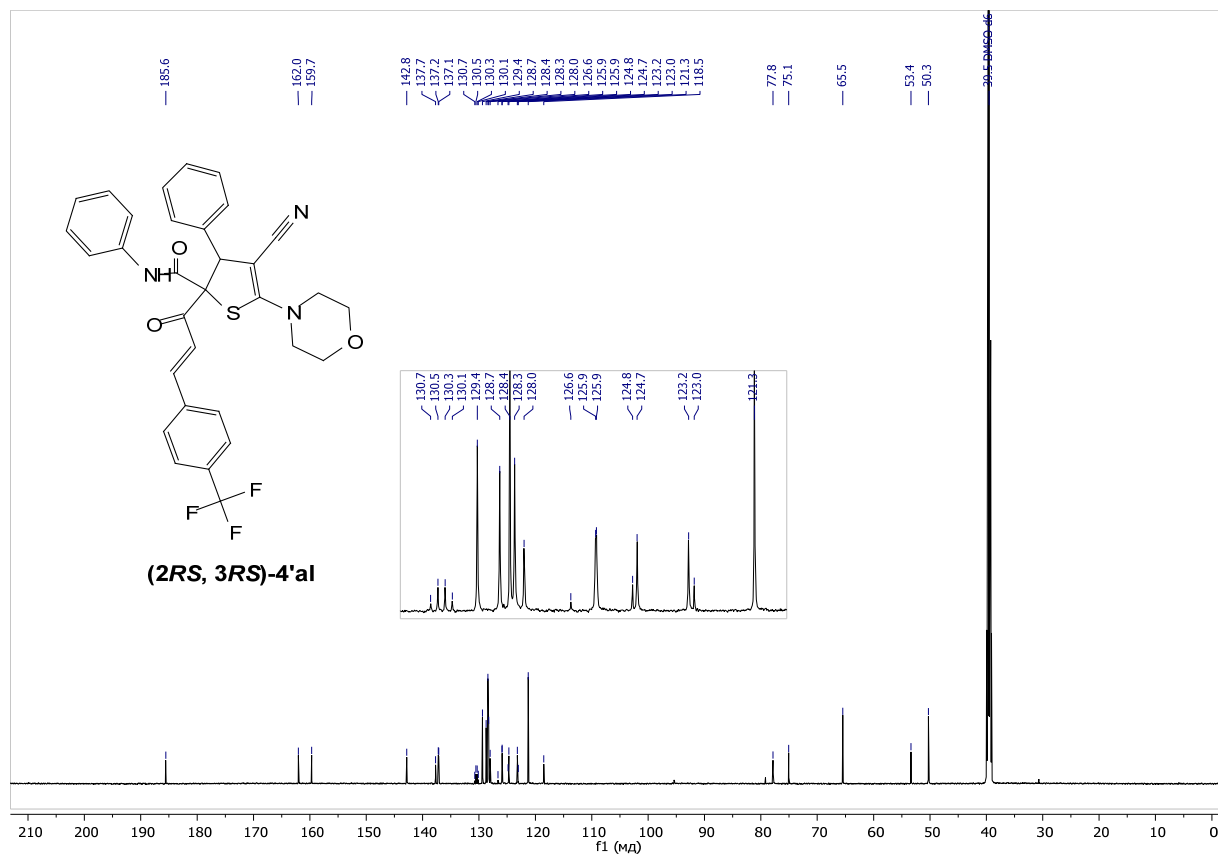

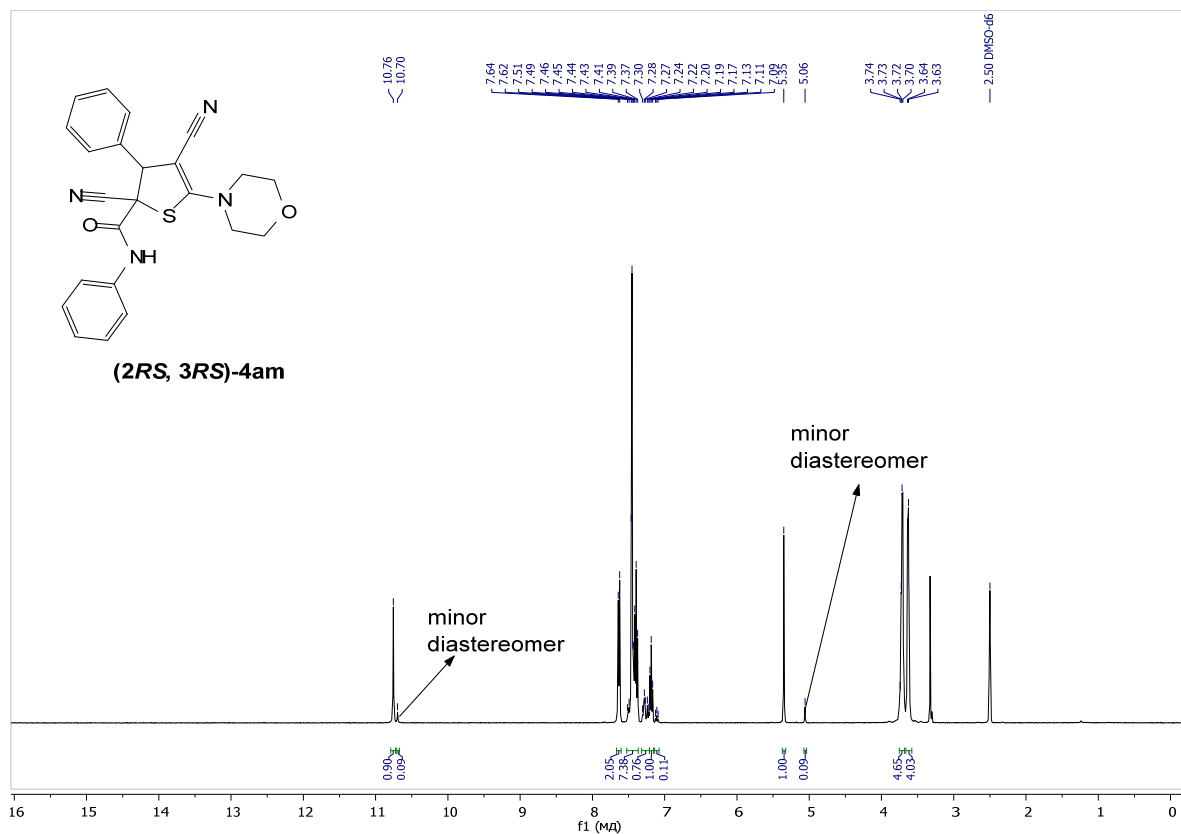

<sup>1</sup>H NMR (400 MHz, DMSO-*d*<sub>6</sub>) of **(2RS,3RS)-4am**

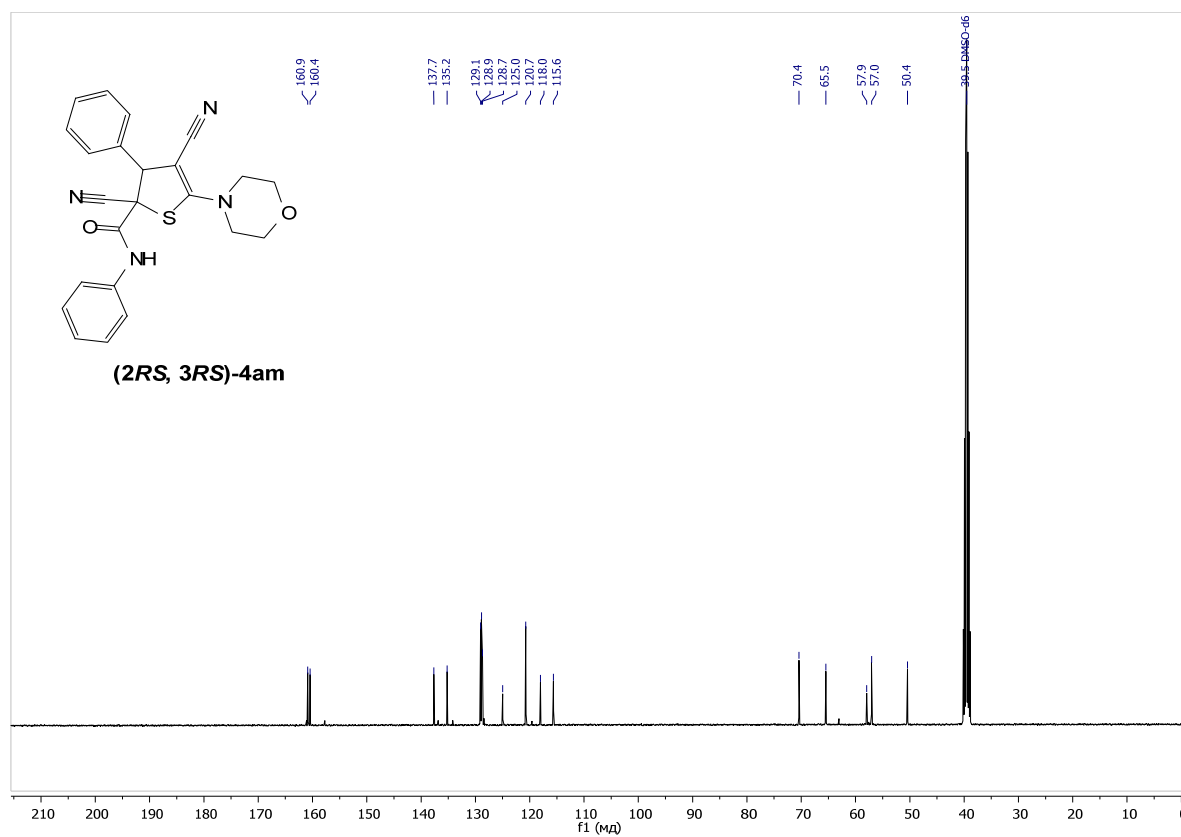

<sup>13</sup>C {<sup>1</sup>H} NMR (100 MHz, DMSO-*d*<sub>6</sub>) of **(2RS,3RS)-4am**

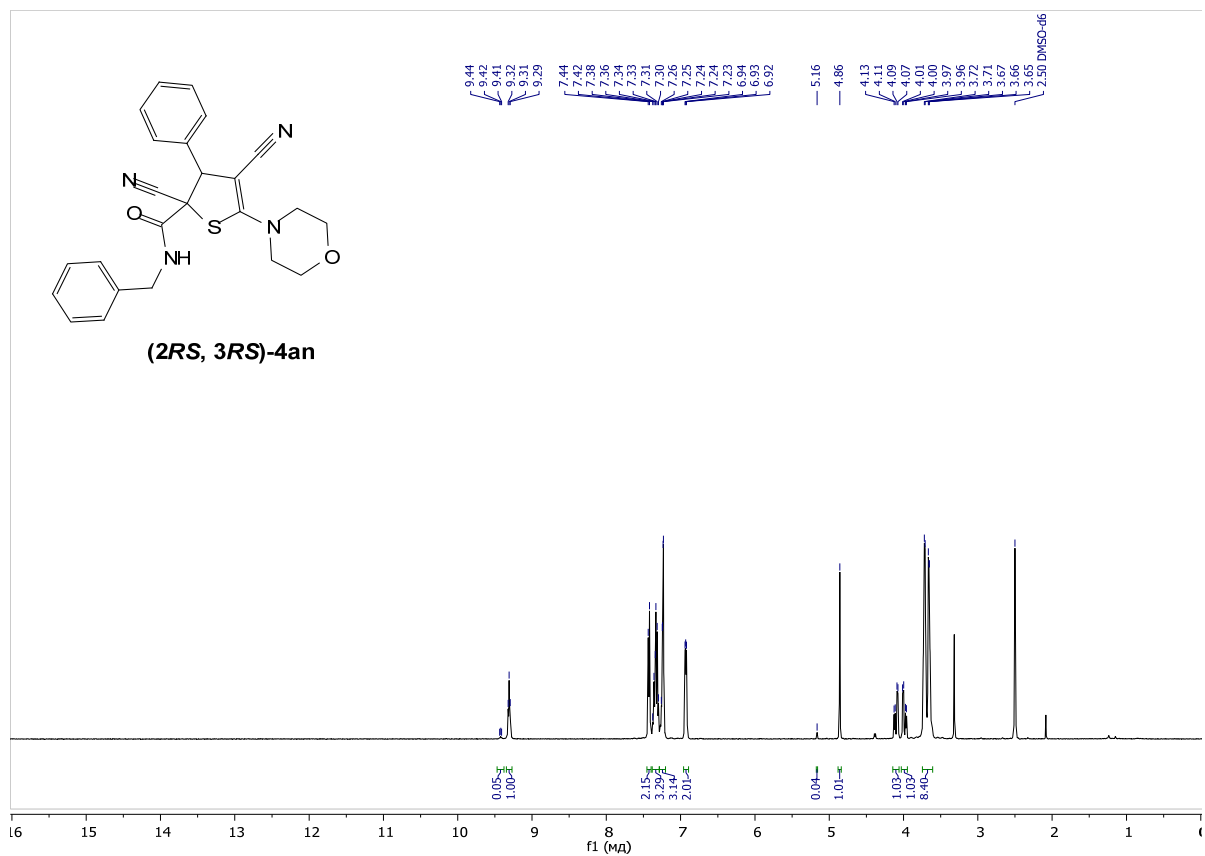

<sup>1</sup>H NMR (400 MHz, DMSO-*d*<sub>6</sub>) of (2RS,3RS)-4an

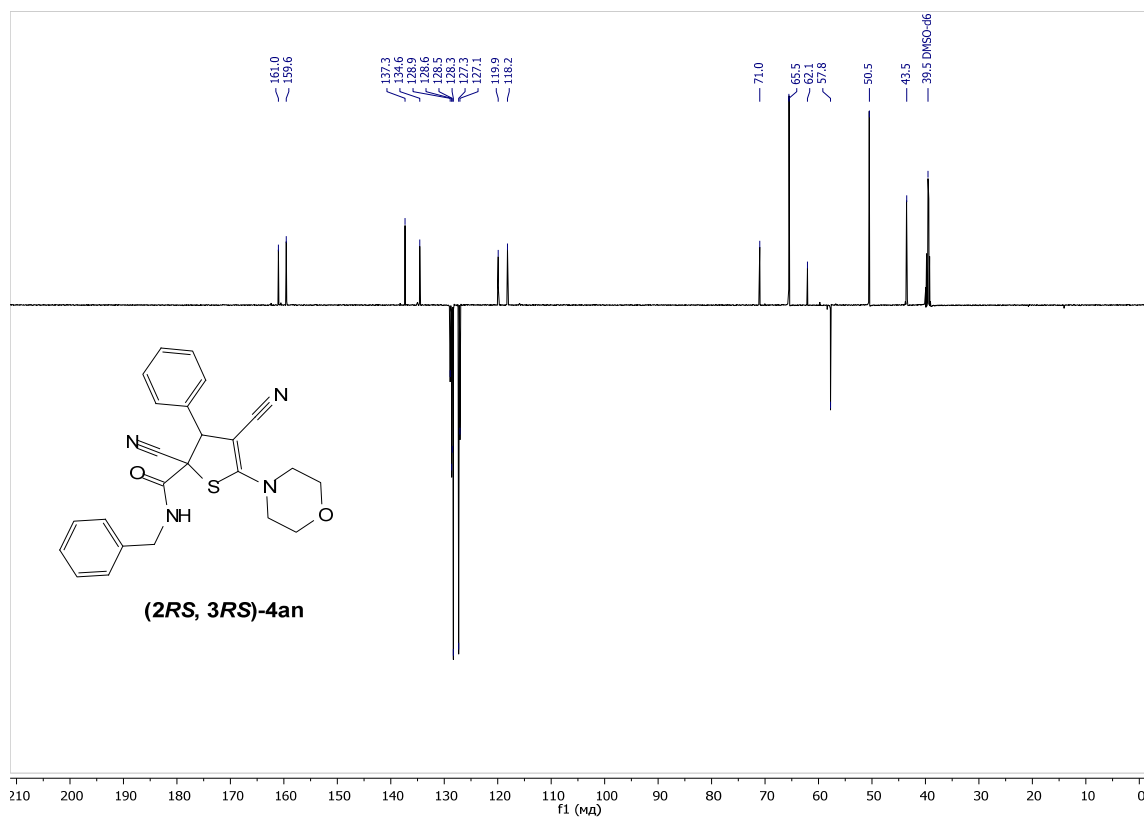

<sup>13</sup>C{<sup>1</sup>H} NMR (150 MHz, DMSO-*d*<sub>6</sub>) of (2RS,3RS)-4an

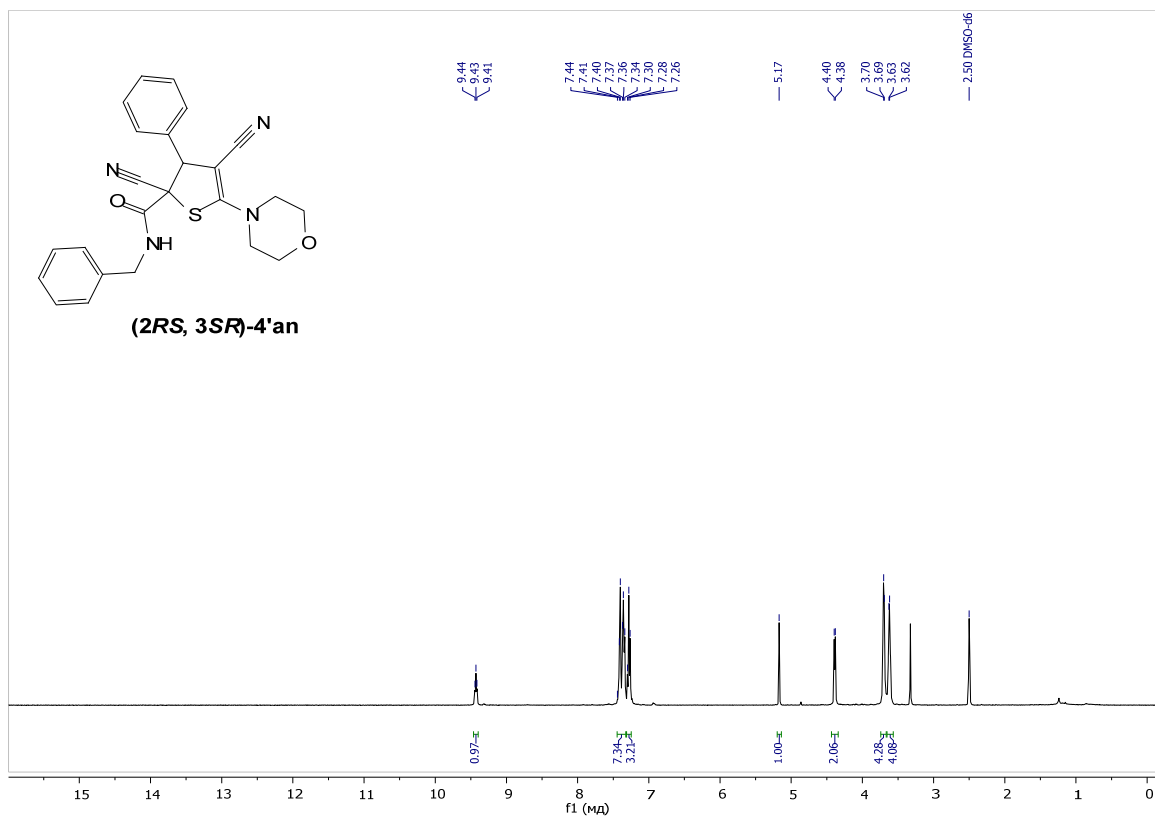

$^1\text{H}$  NMR (400 MHz, DMSO- $d_6$ ) of **(2RS,3SR)-4'an**

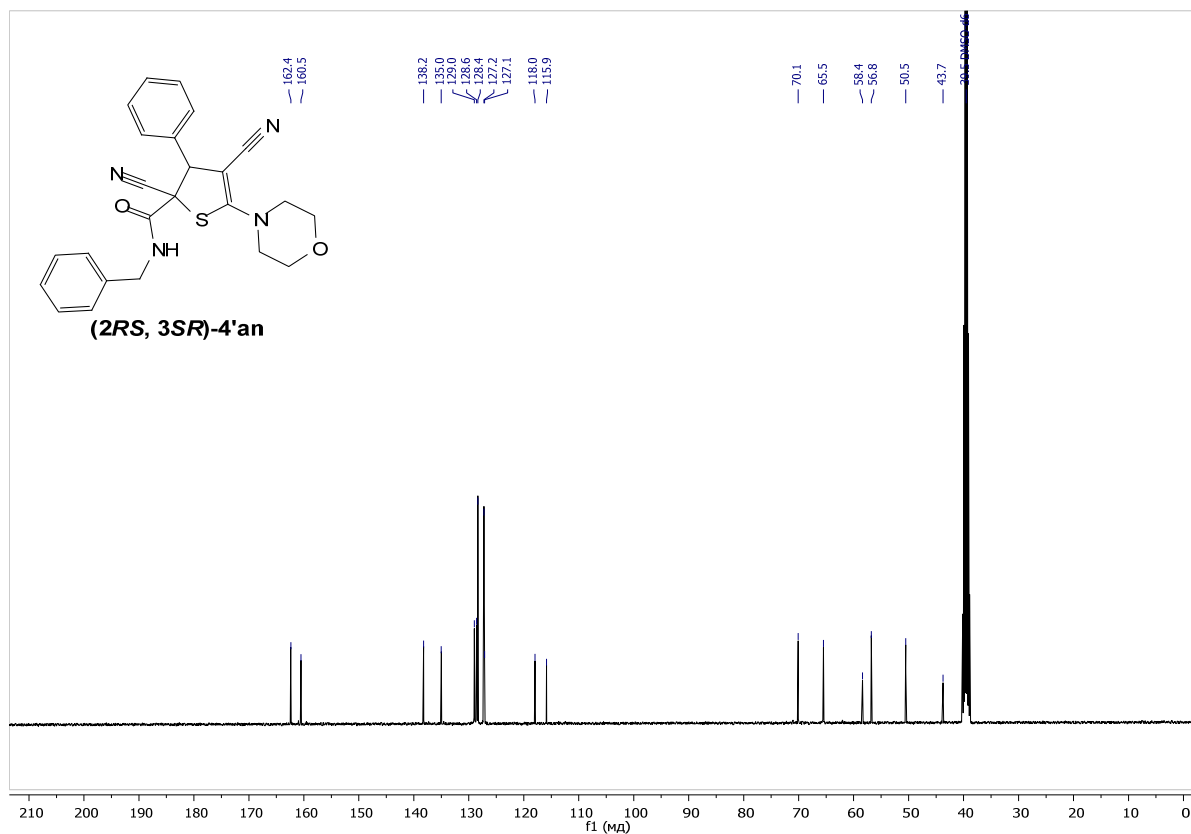

$^{13}\text{C}$  NMR (100 MHz, DMSO- $d_6$ ) of **(2RS,3SR)-4'an**

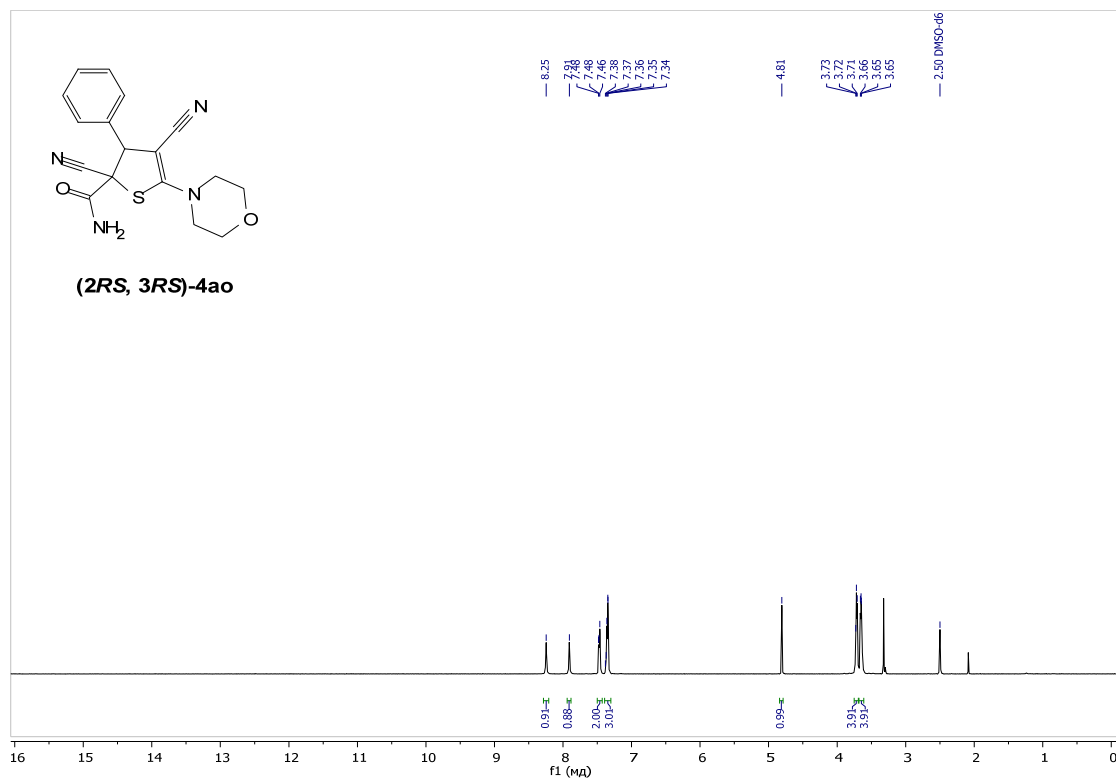

<sup>1</sup>H NMR (400 MHz, DMSO-*d*<sub>6</sub>) of **(2RS,3RS)-4ao**

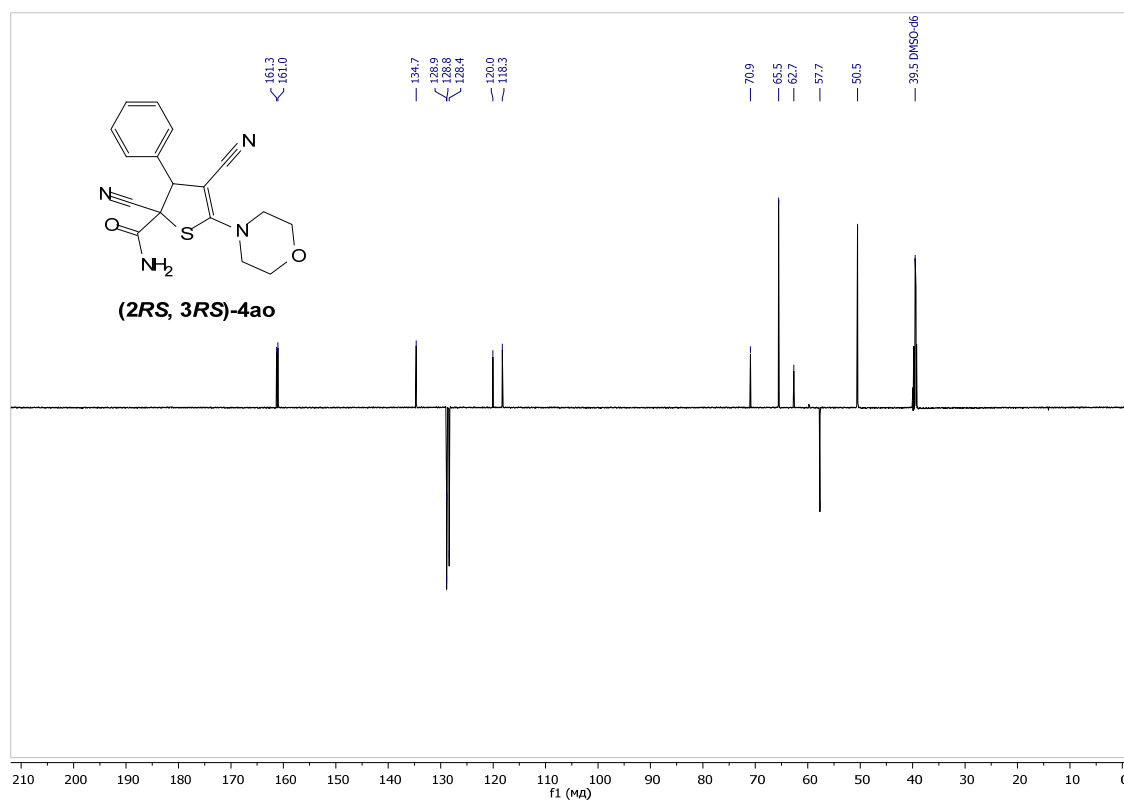

<sup>13</sup>C {<sup>1</sup>H} NMR (150 MHz, DMSO-*d*<sub>6</sub>) of **(2RS,3RS)-4ao**

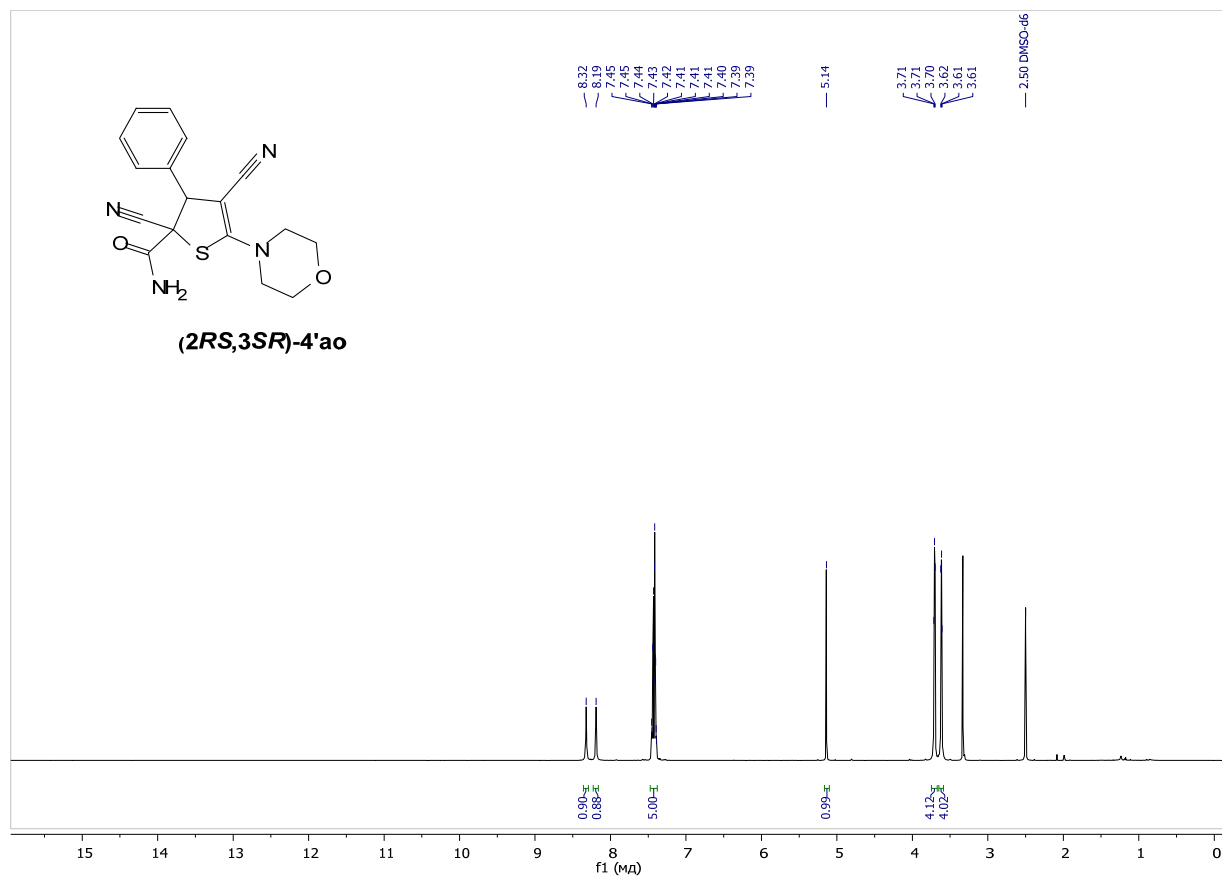

<sup>1</sup>H NMR (600 MHz, DMSO-*d*<sub>6</sub>) of **(2RS,3SR)-4'ao**

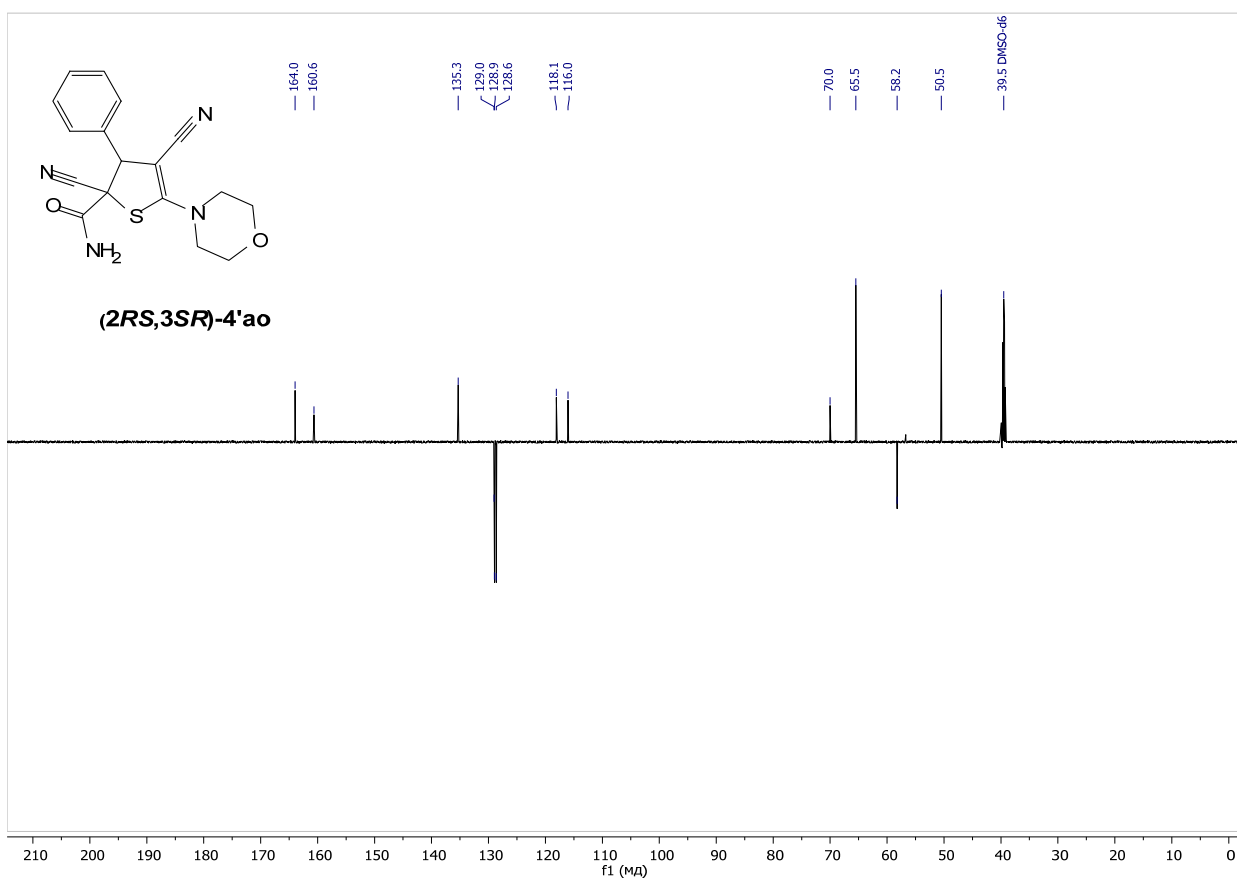

<sup>13</sup>C {<sup>1</sup>H} NMR (150 MHz, DMSO-*d*<sub>6</sub>) of **(2RS,3SR)-4'ao**

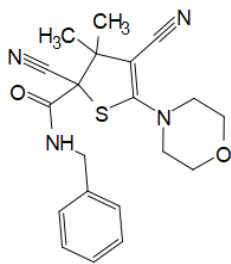

**5hn**

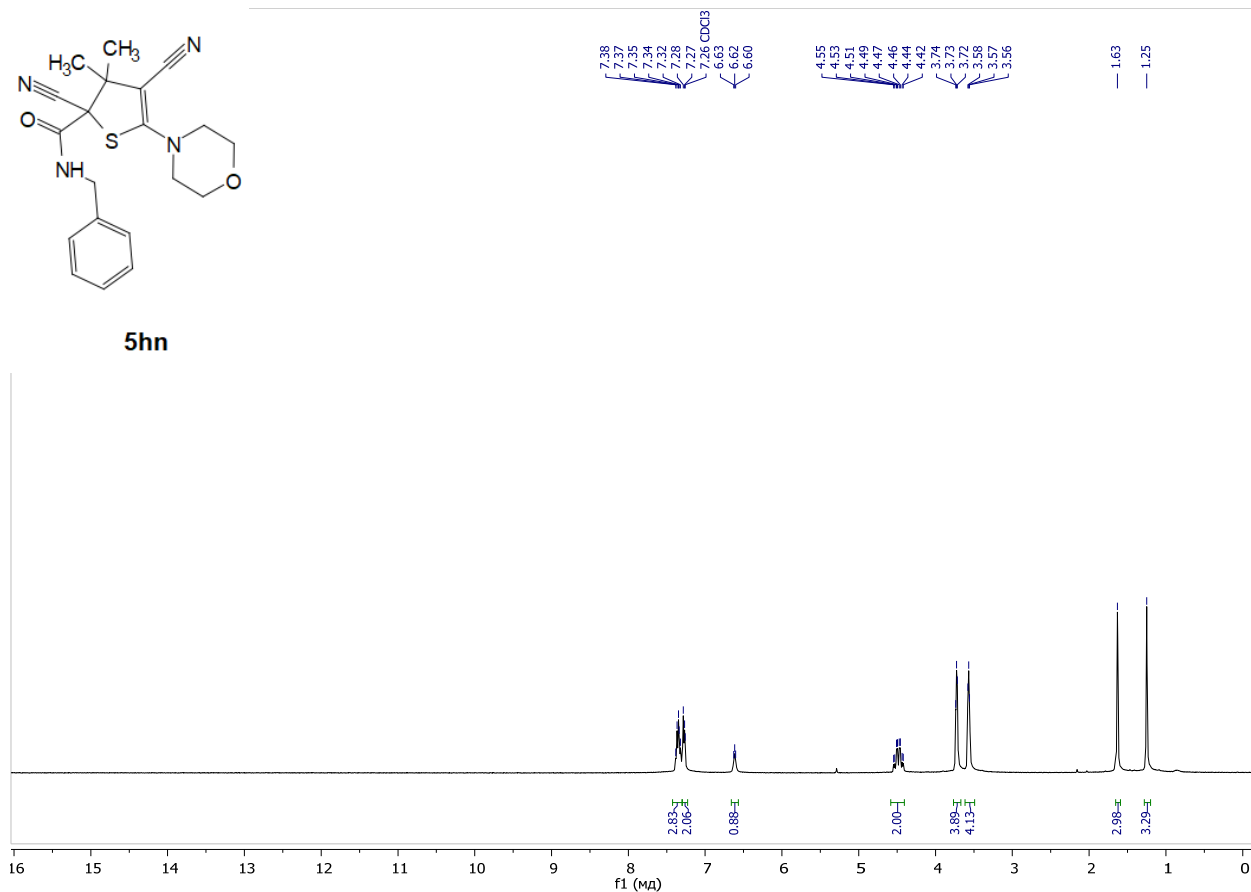

$^1\text{H}$  NMR (400 MHz,  $\text{CDCl}_3$ -*d*) of **5hn**

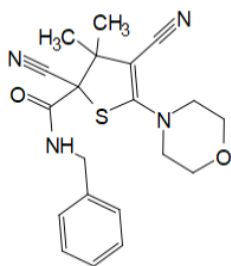

**5hn**

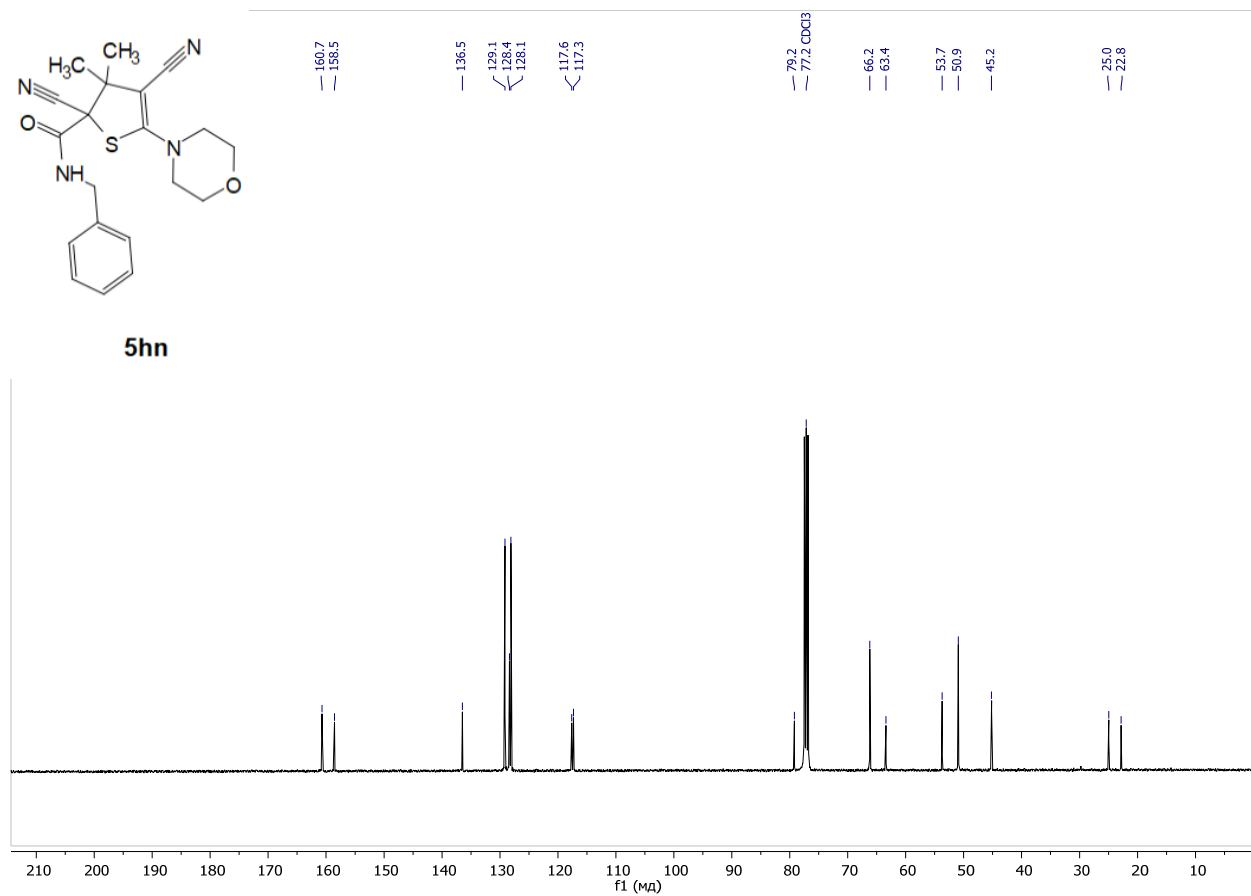

$^{13}\text{C}\{^1\text{H}\}$  NMR (100 MHz,  $\text{DMSO}-d_6$ ) of **5hn**



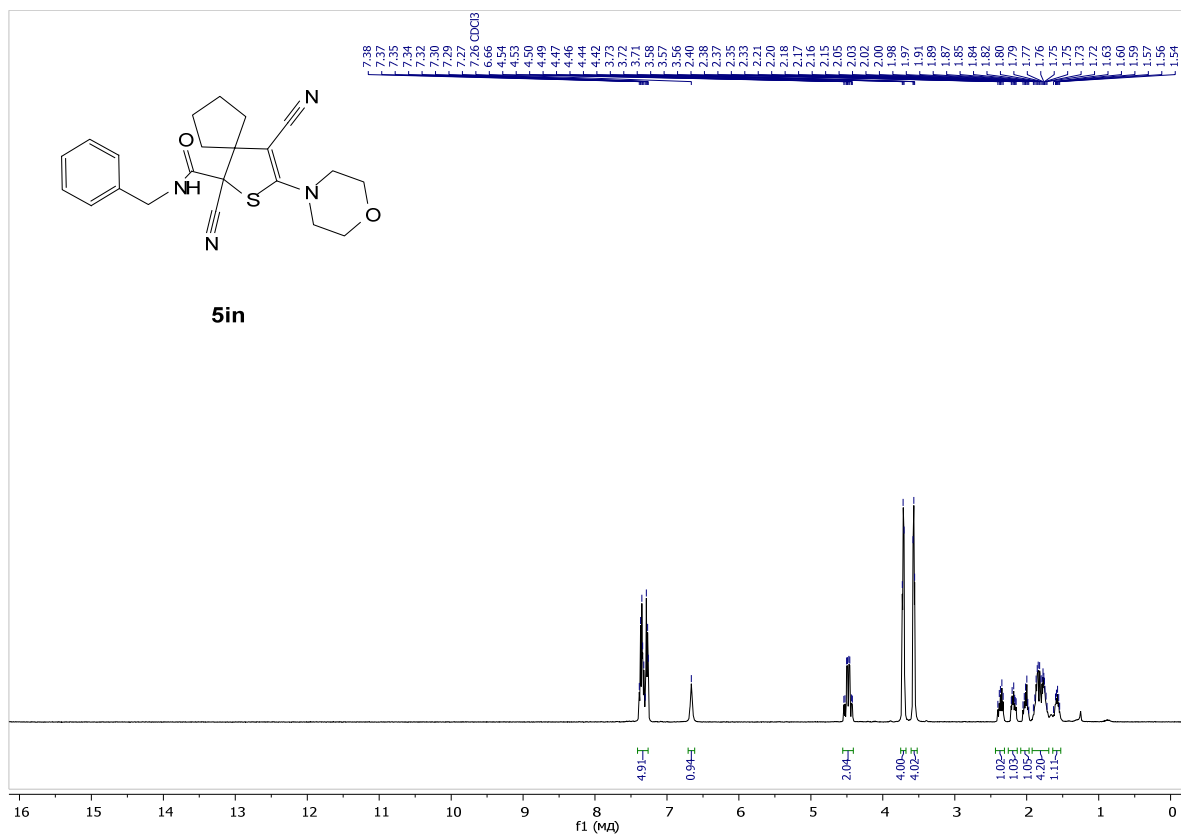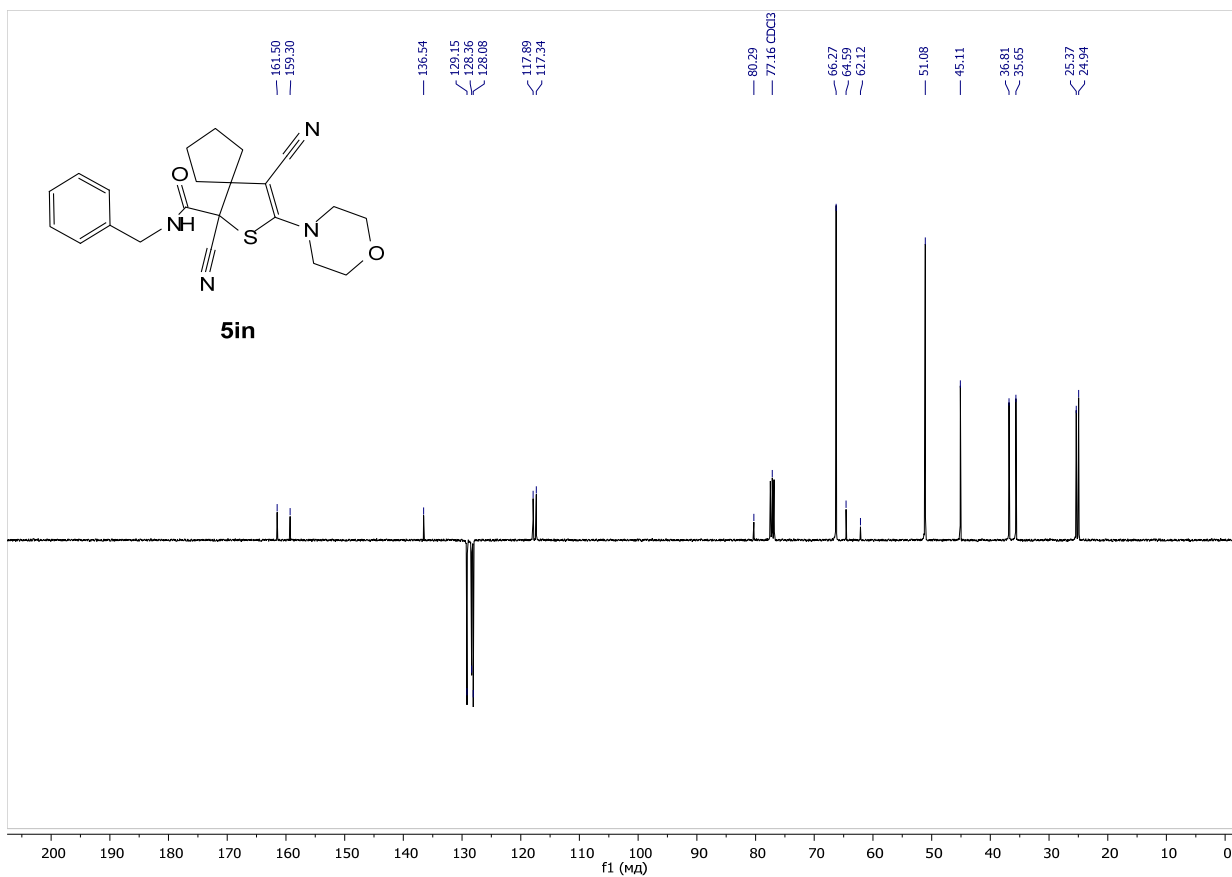

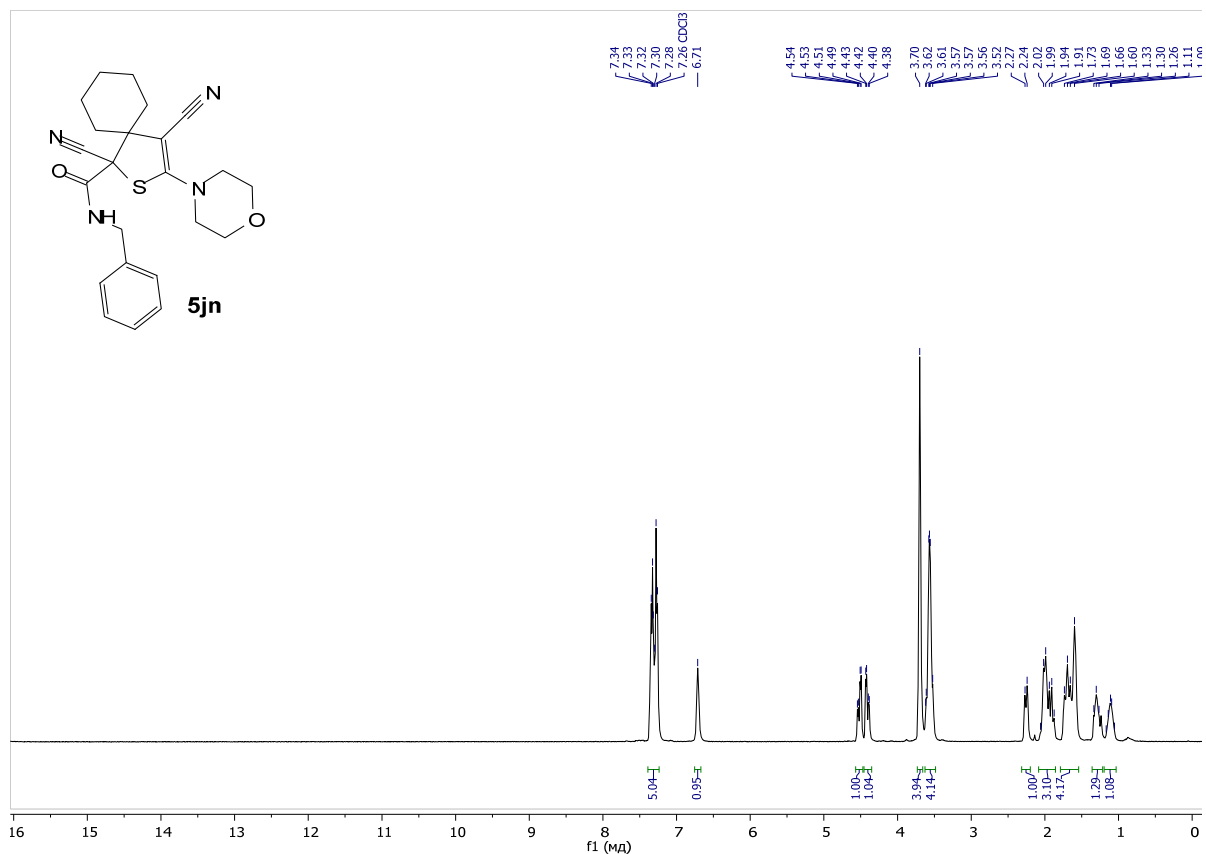

**<sup>1</sup>H NMR (400 MHz, CDCl<sub>3</sub>-d) of 5jn**

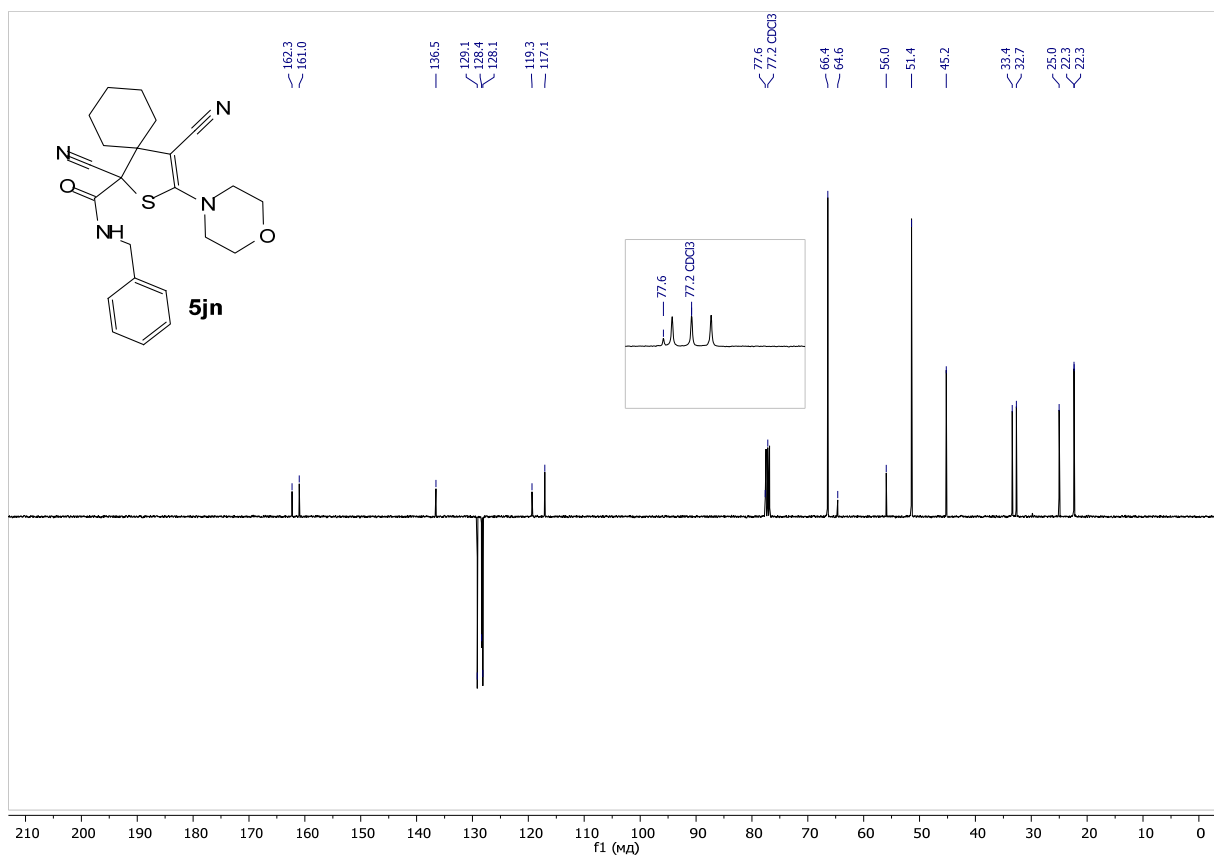

**<sup>13</sup>C {<sup>1</sup>H} NMR (100 MHz, CDCl<sub>3</sub>-d) of 5jn**

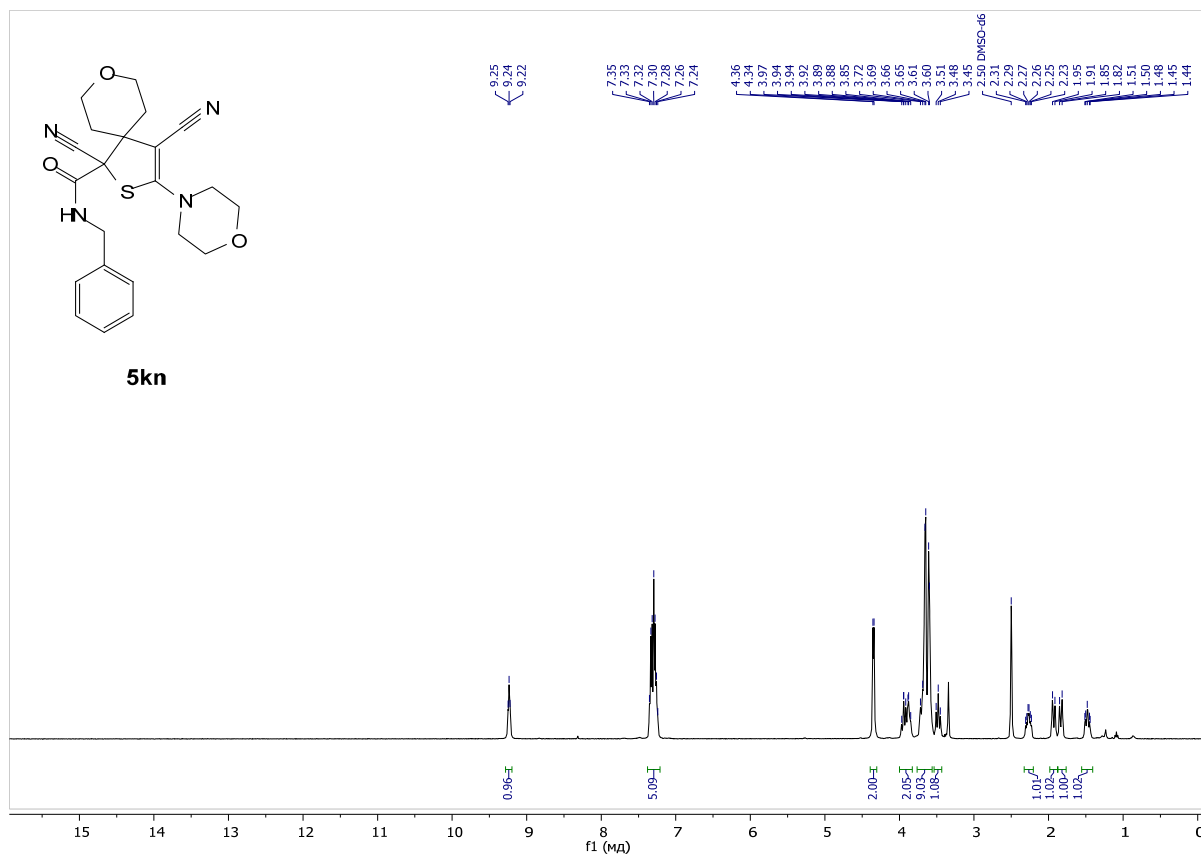

$^1\text{H}$  NMR (400 MHz,  $\text{DMSO-}d_6$ ) of **5kn**

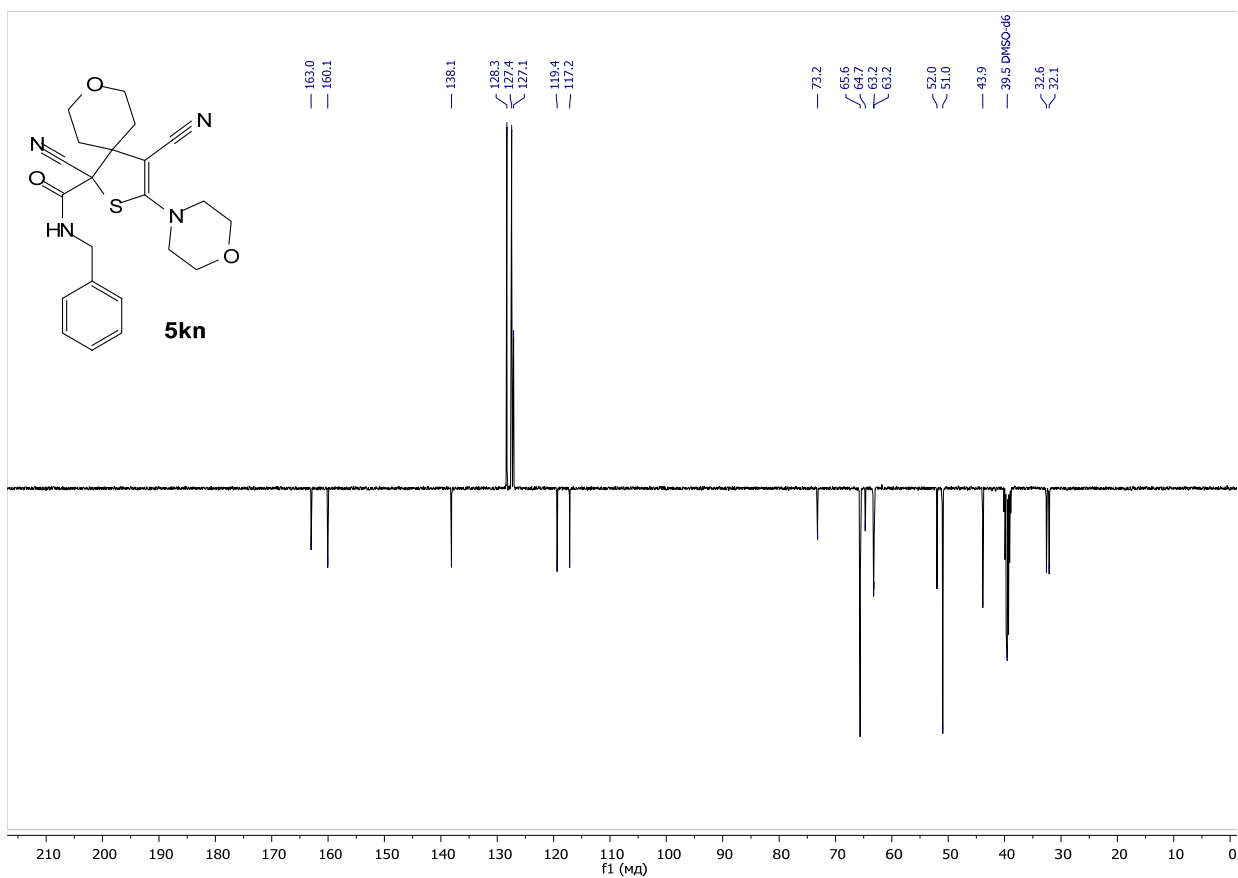

$^{13}\text{C}$  NMR (100 MHz,  $\text{DMSO-}d_6$ ) of **5kn**

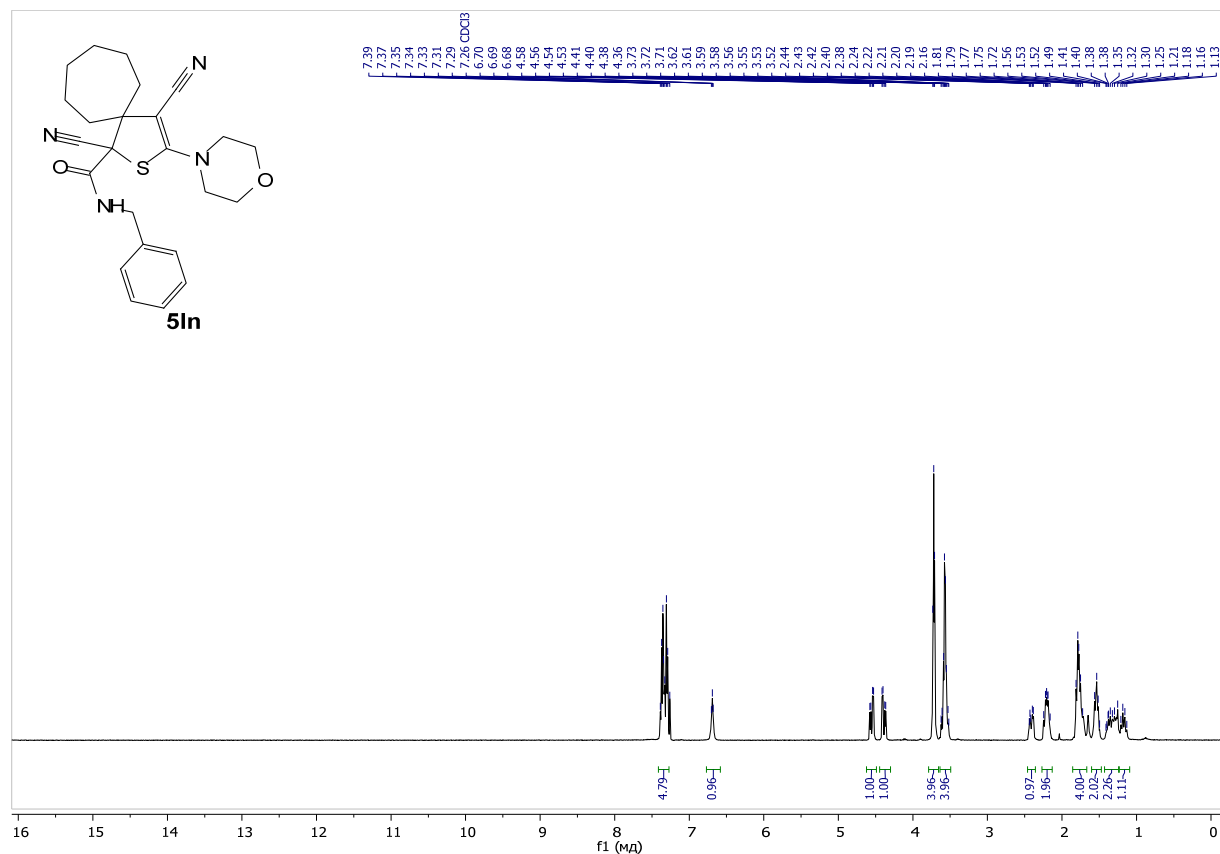

$^1\text{H}$  NMR (400 MHz,  $\text{CDCl}_3-d$ ) of **5In**

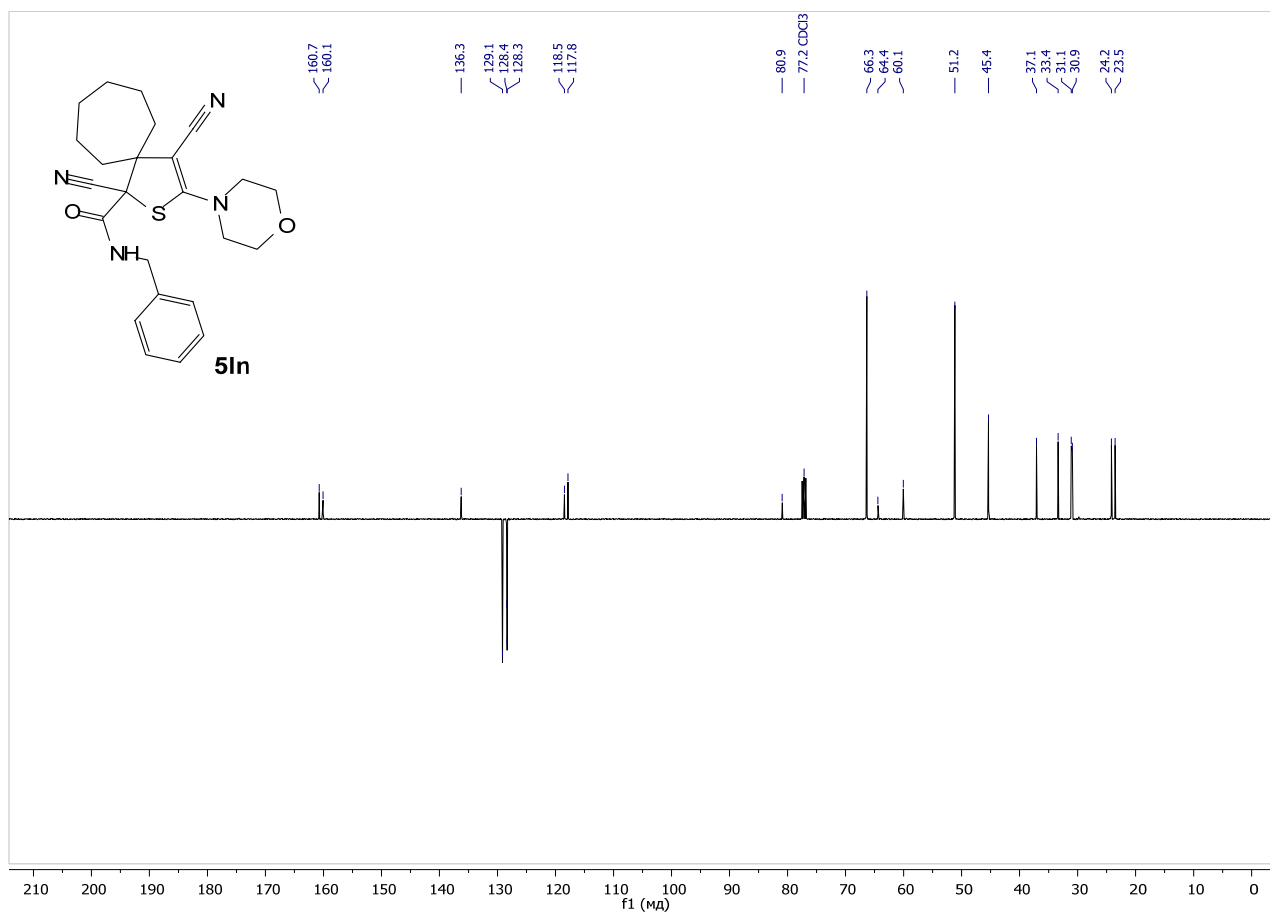

$^{13}\text{C}\{^1\text{H}\}$  NMR (100 MHz,  $\text{CDCl}_3-d$ ) of **5In**

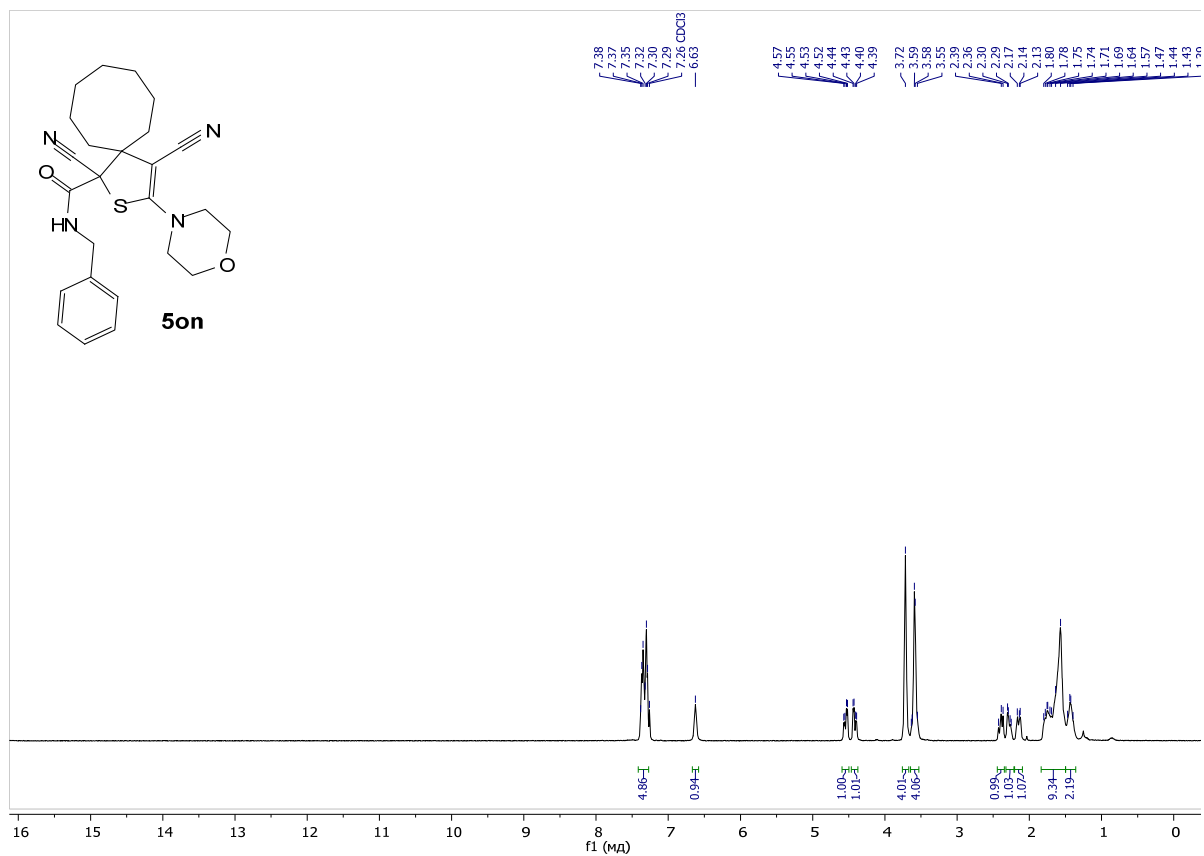

**<sup>1</sup>H NMR (400 MHz, CDCl<sub>3</sub>-d) of 5on**

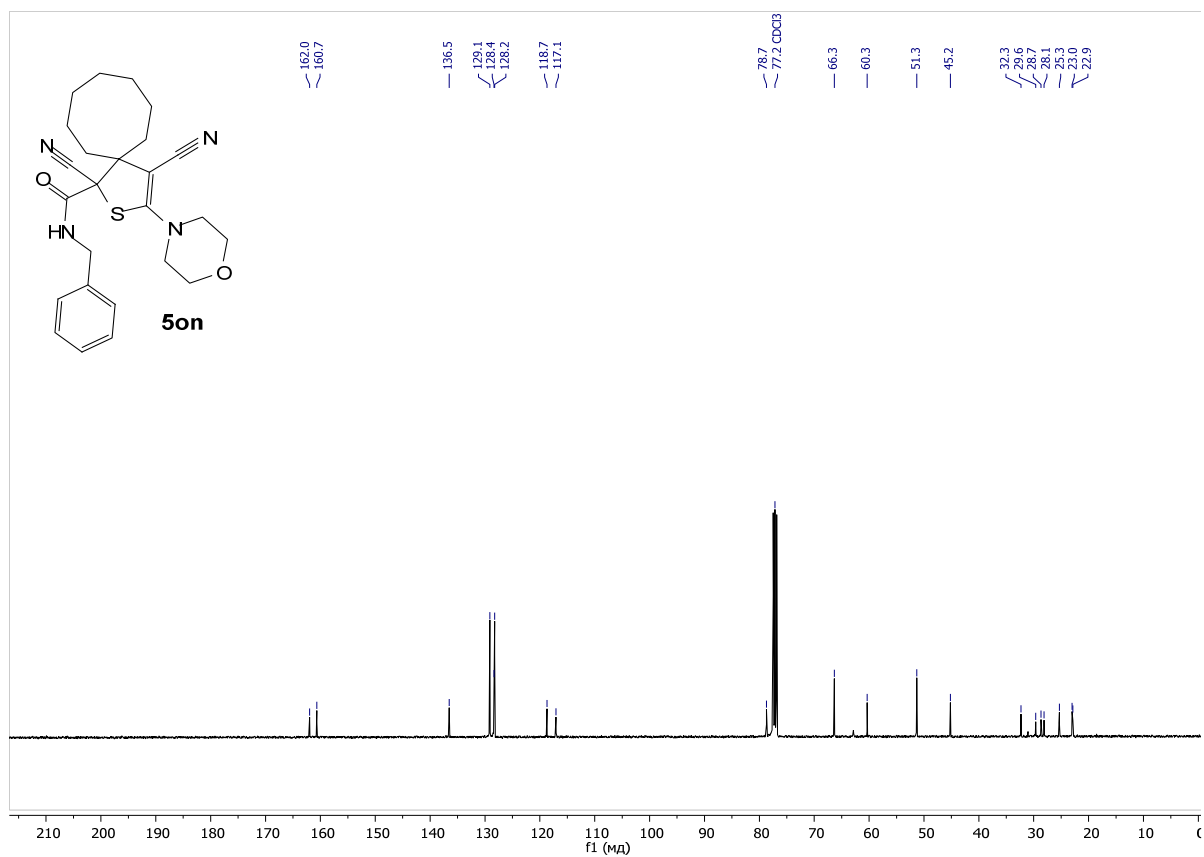

**<sup>13</sup>C{<sup>1</sup>H} NMR (100 MHz, CDCl<sub>3</sub>-d) of 5on**

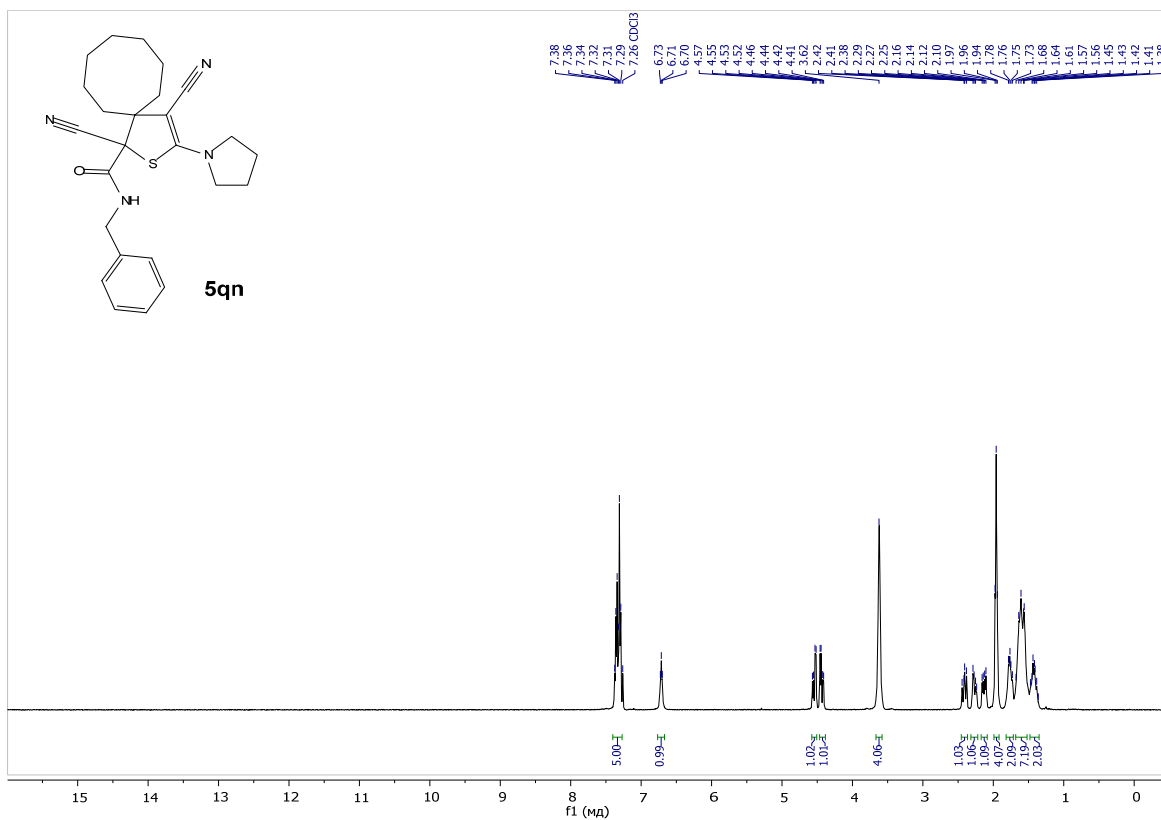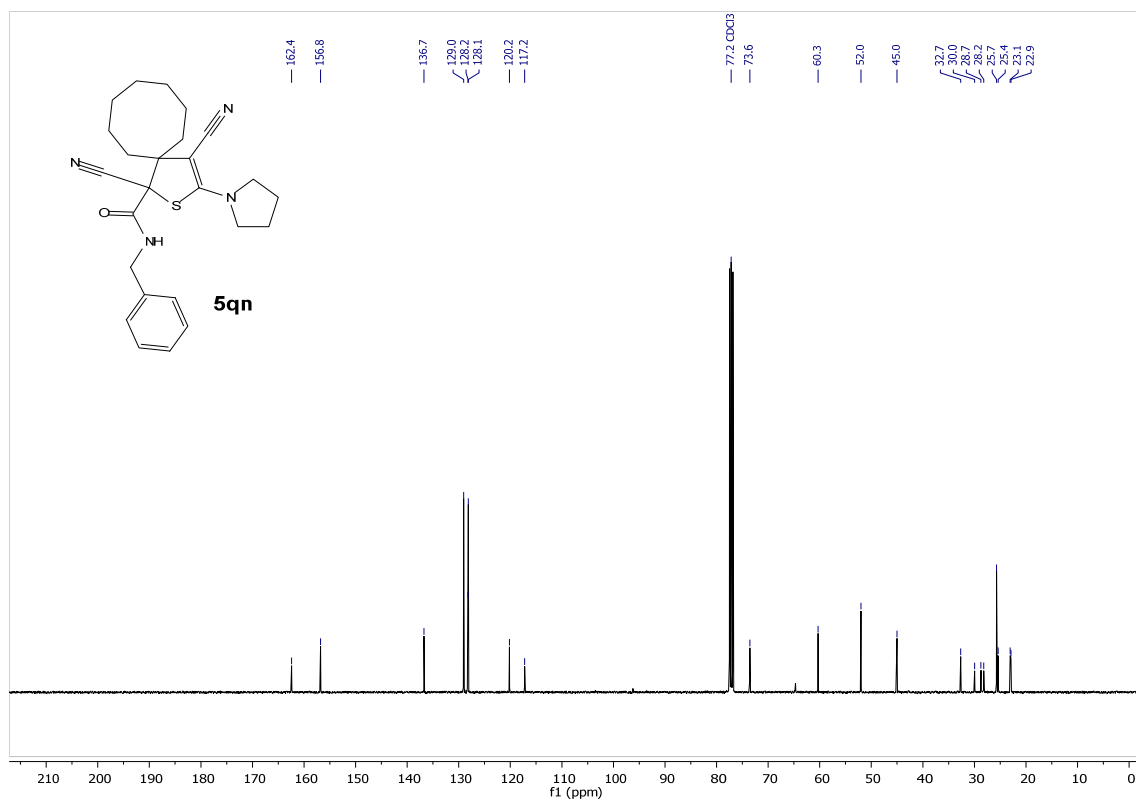

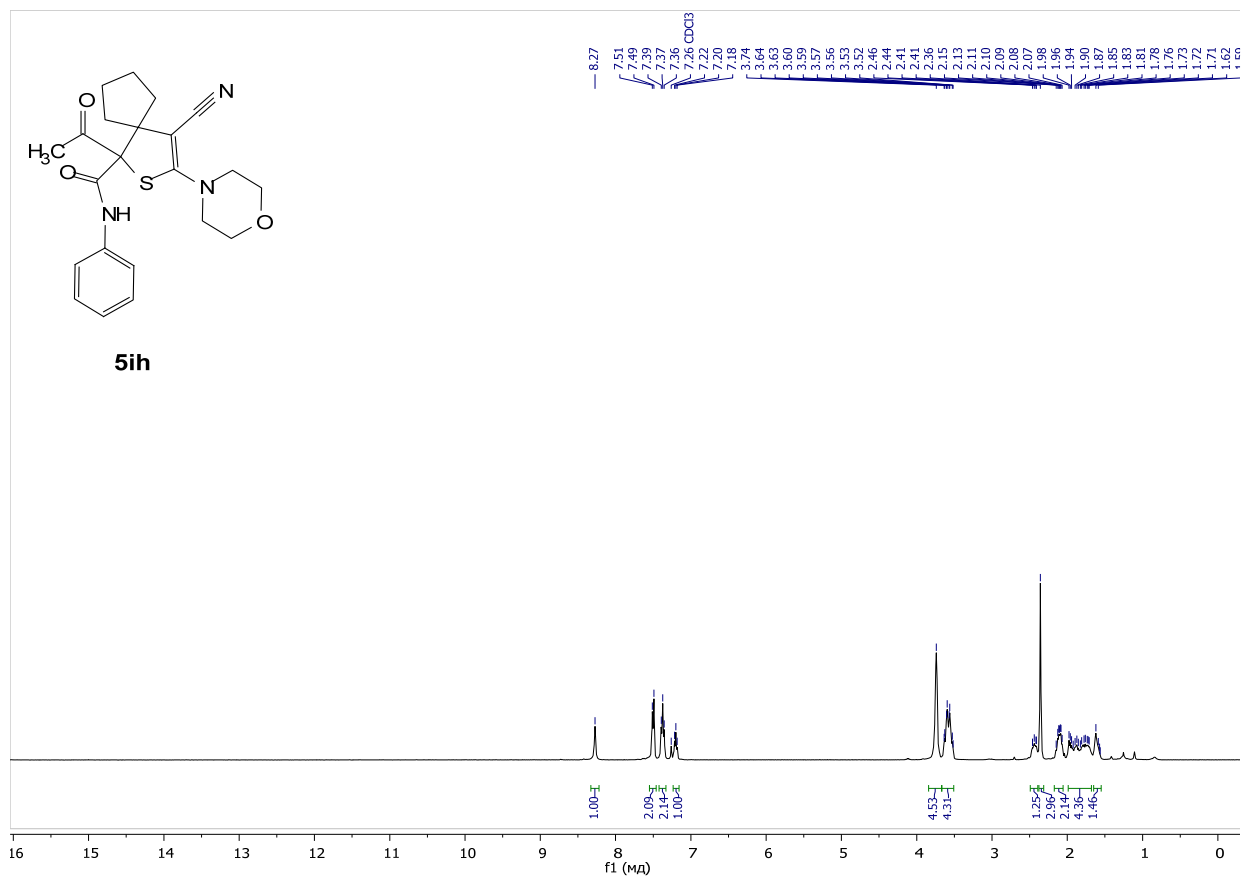

<sup>1</sup>H NMR (400 MHz, CDCl<sub>3</sub>-d) of **5ih**

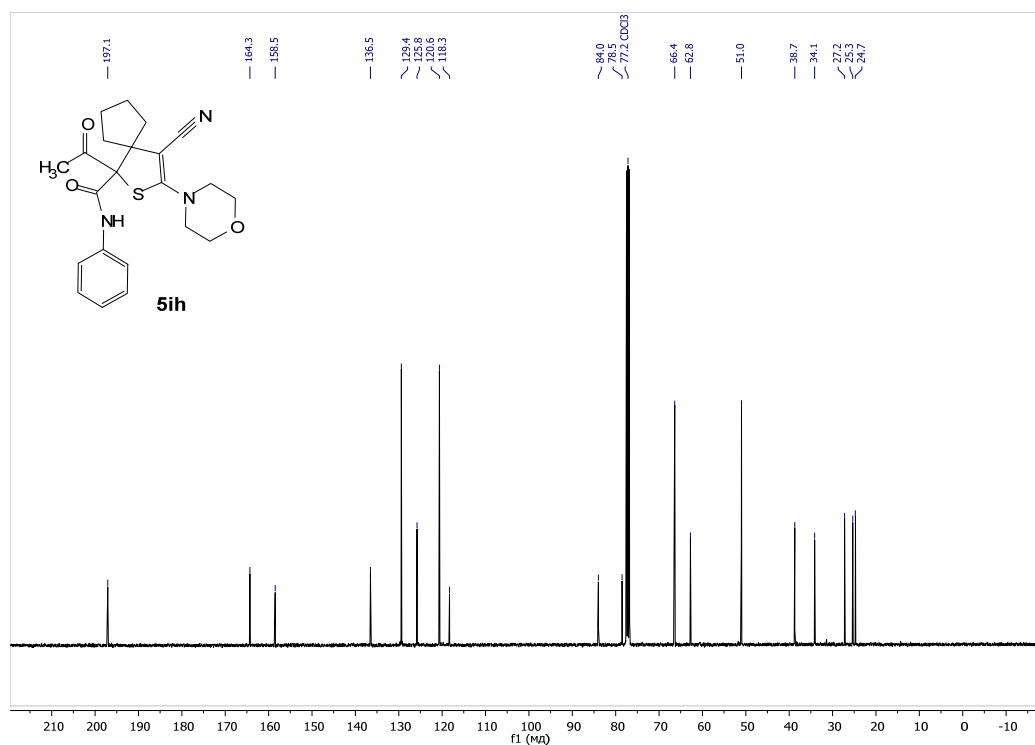

<sup>13</sup>C {<sup>1</sup>H} NMR (100 MHz, CDCl<sub>3</sub>-d) of **5ih**

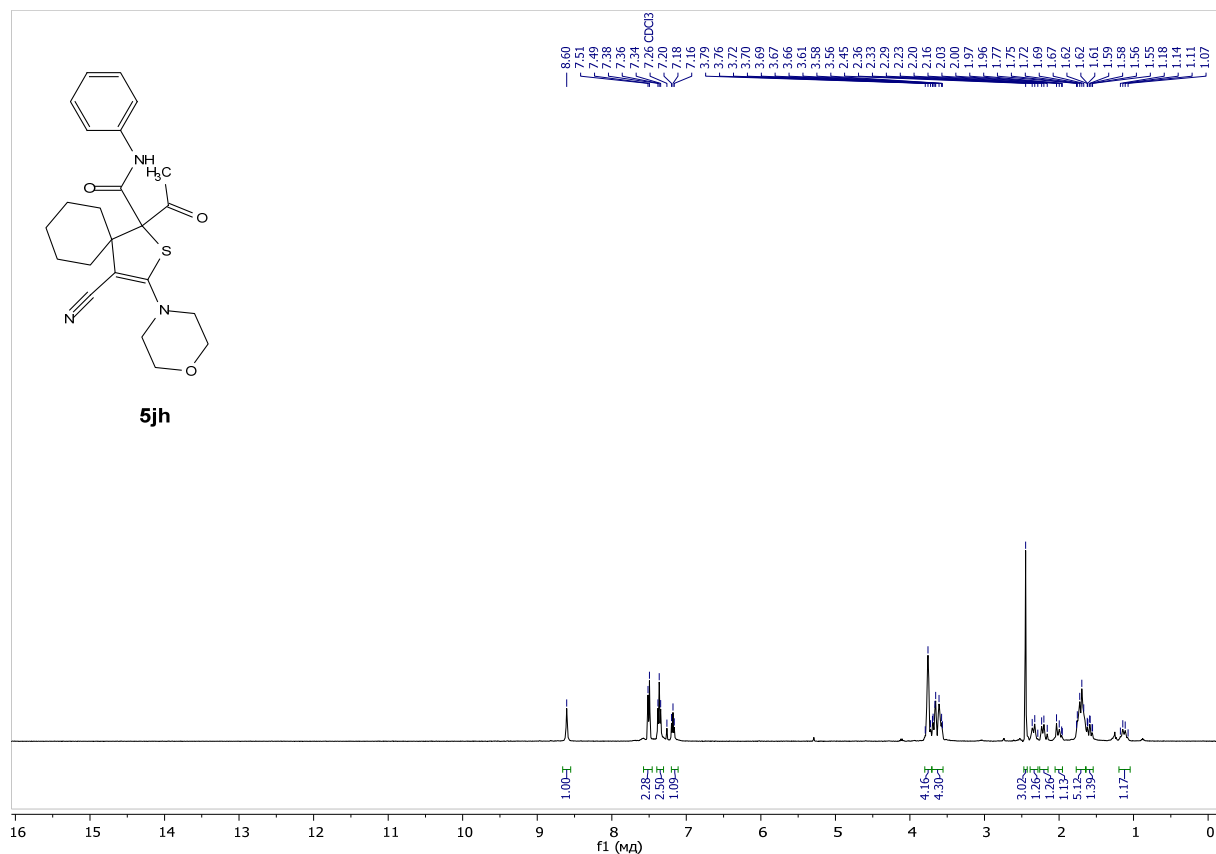

<sup>1</sup>H NMR (400 MHz, CDCl<sub>3</sub>-d) of **5jh**

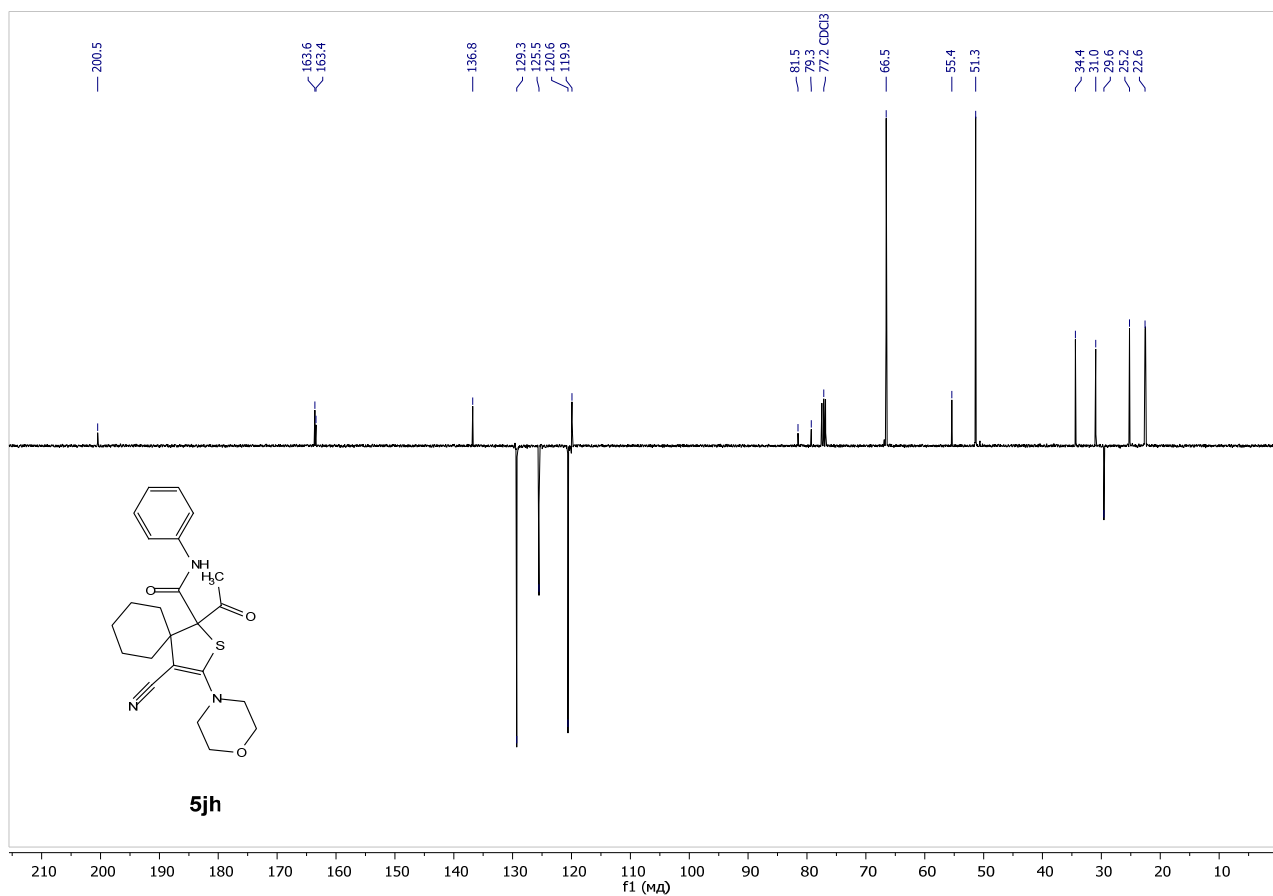

<sup>13</sup>C{<sup>1</sup>H} NMR (100 MHz, CDCl<sub>3</sub>-d) of **5jh**



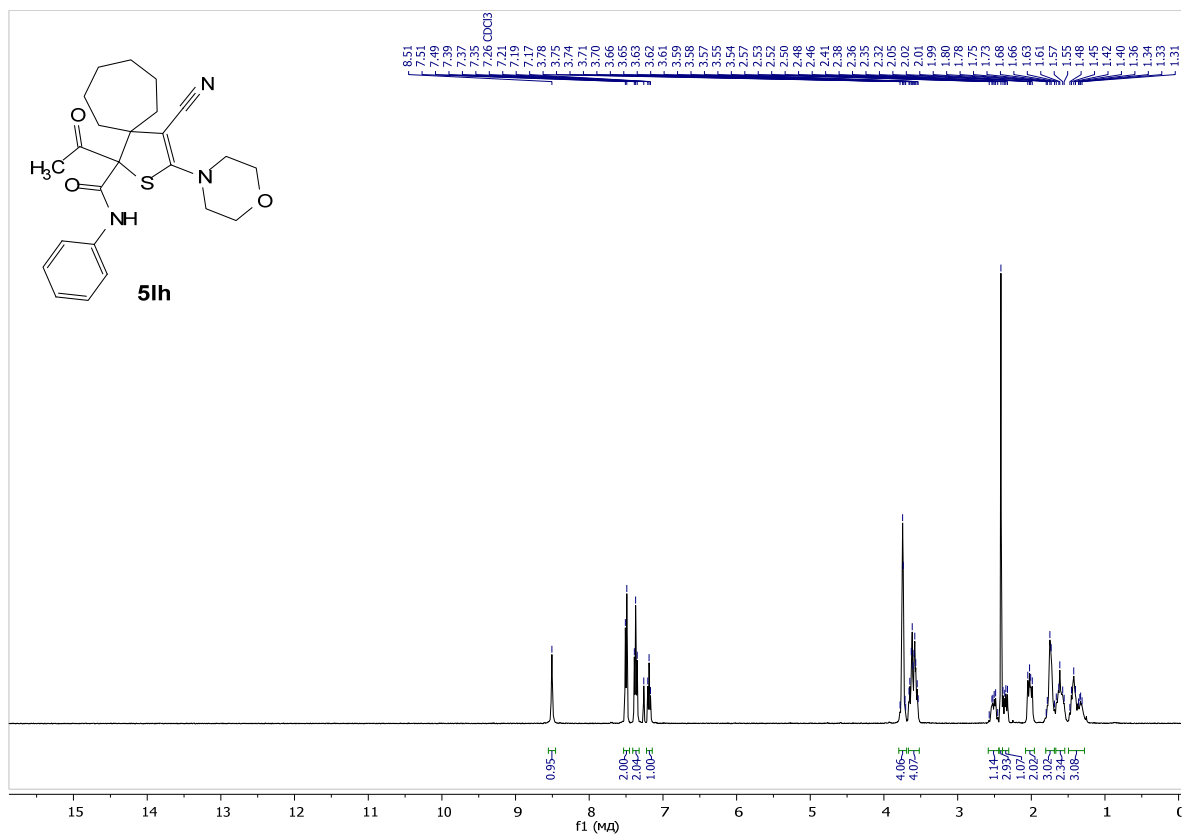

$^1\text{H}$  NMR (400 MHz,  $\text{CDCl}_3-d$ ) of **5lh**

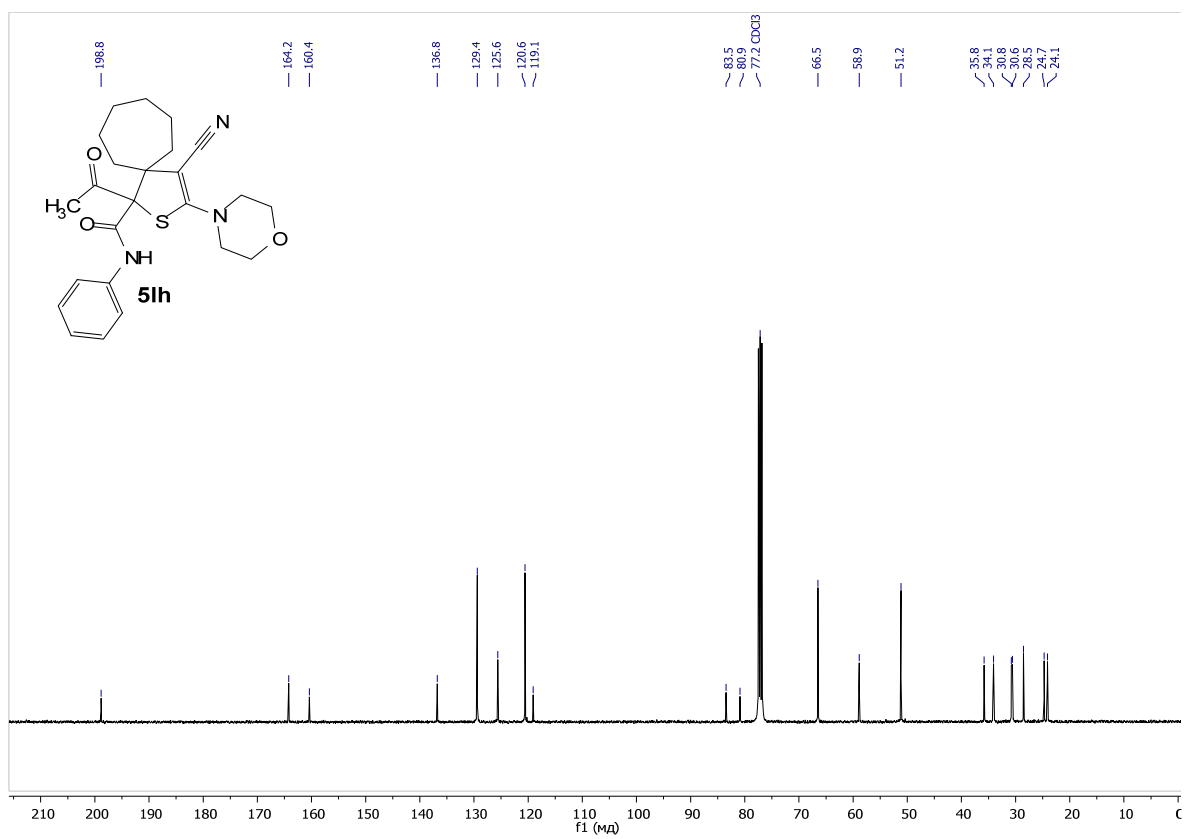

$^{13}\text{C}\{^1\text{H}\}$  NMR (100 MHz,  $\text{CDCl}_3-d$ ) of **5lh**

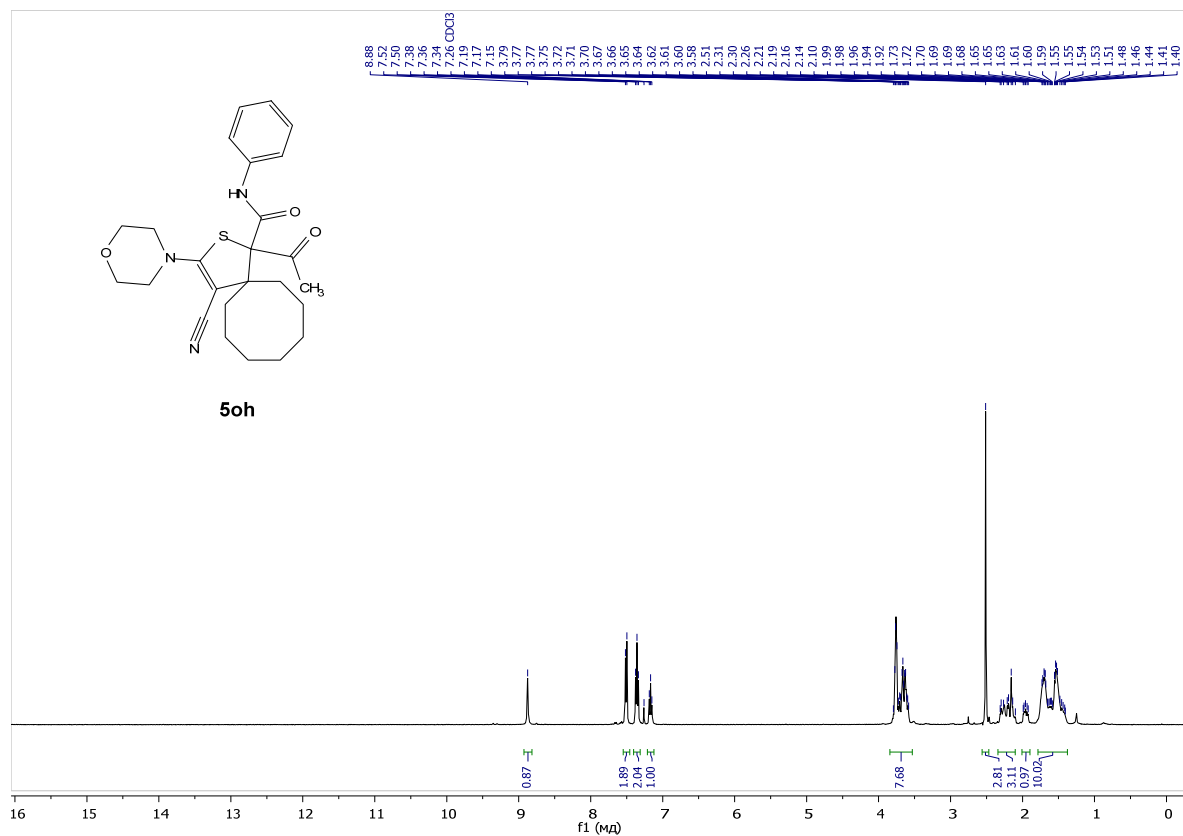

$^1\text{H}$  NMR (400 MHz,  $\text{CDCl}_3-d$ ) of **5oh**

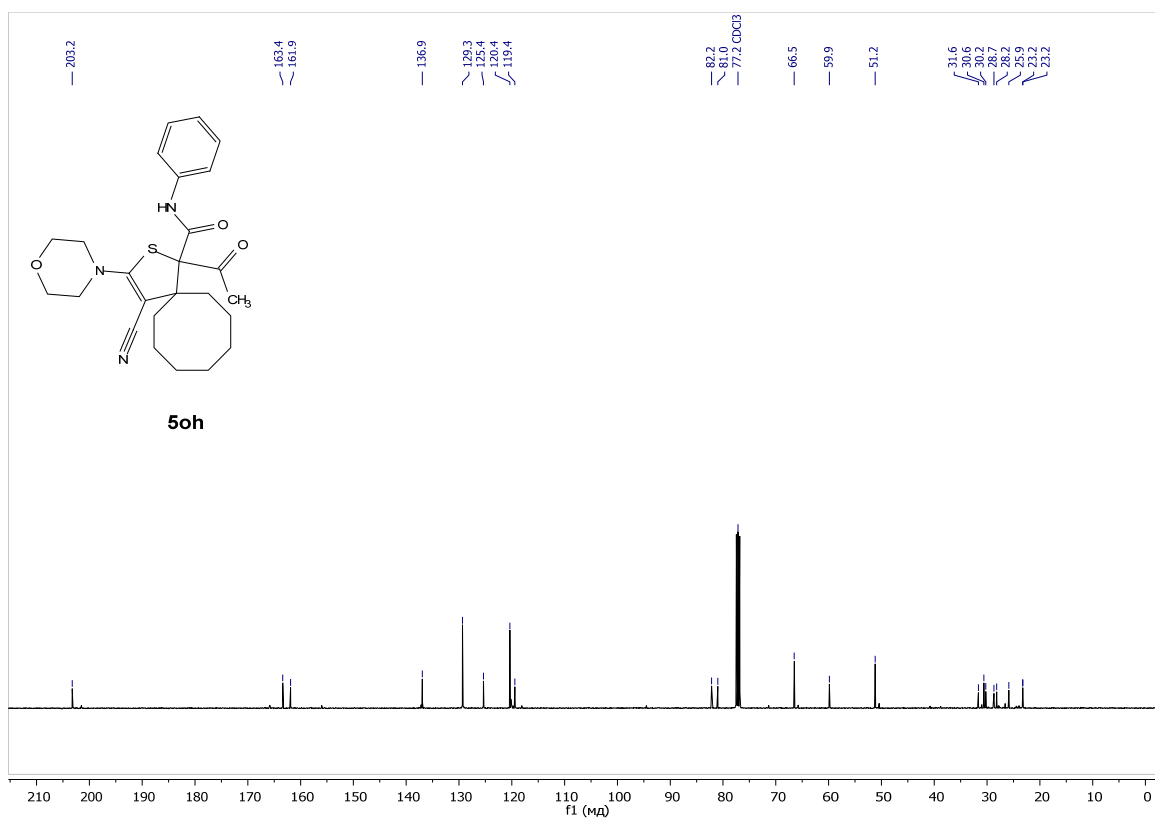

$^{13}\text{C}\{^1\text{H}\}$  NMR (100 MHz,  $\text{CDCl}_3-d$ ) of **5oh**

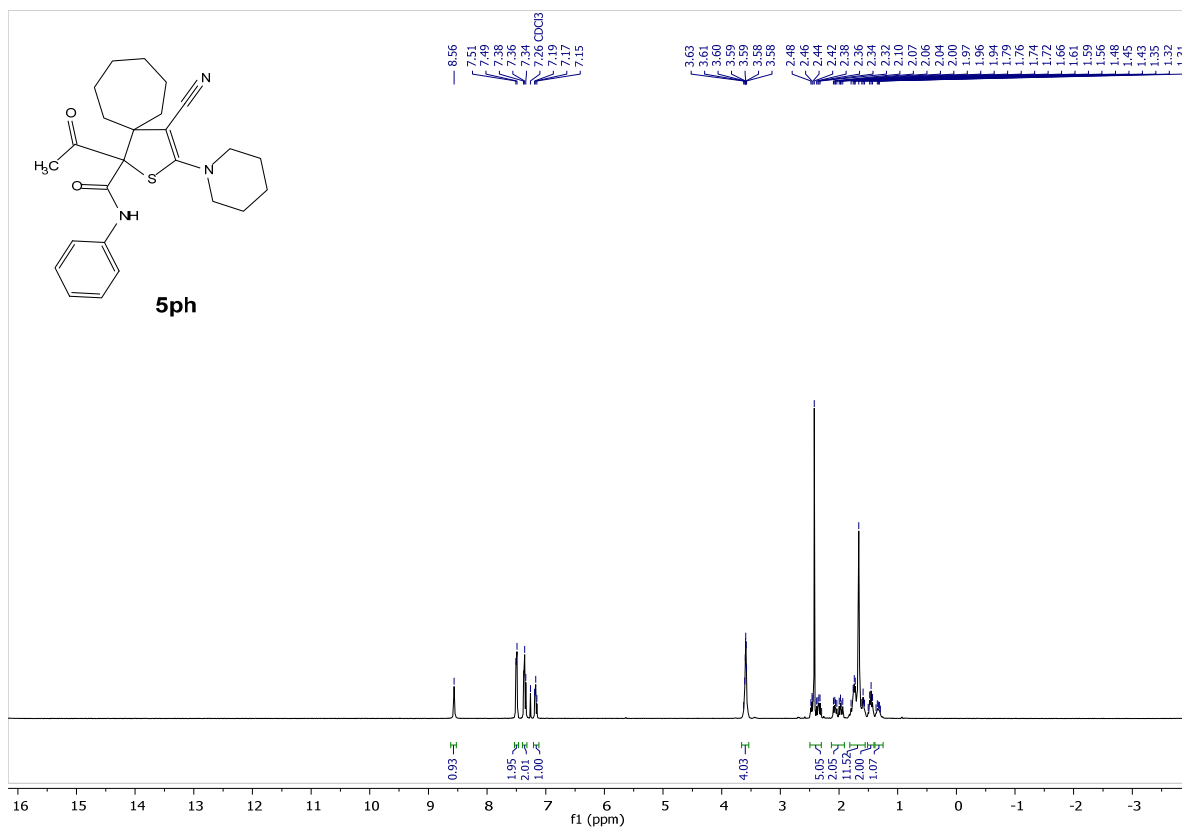

<sup>1</sup>H NMR (400 MHz, CDCl<sub>3</sub>-d) of **5ph**

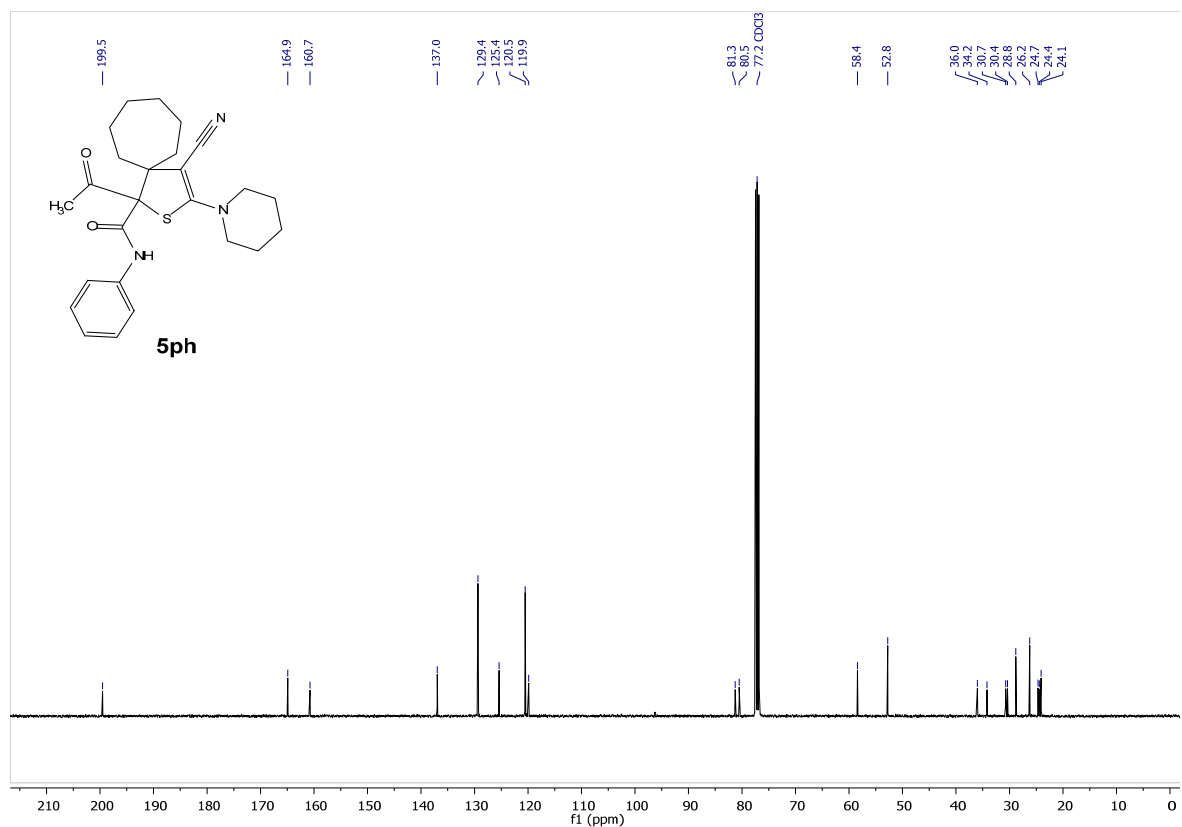

<sup>13</sup>C{<sup>1</sup>H} NMR (100 MHz, CDCl<sub>3</sub>-d) of **5ph**

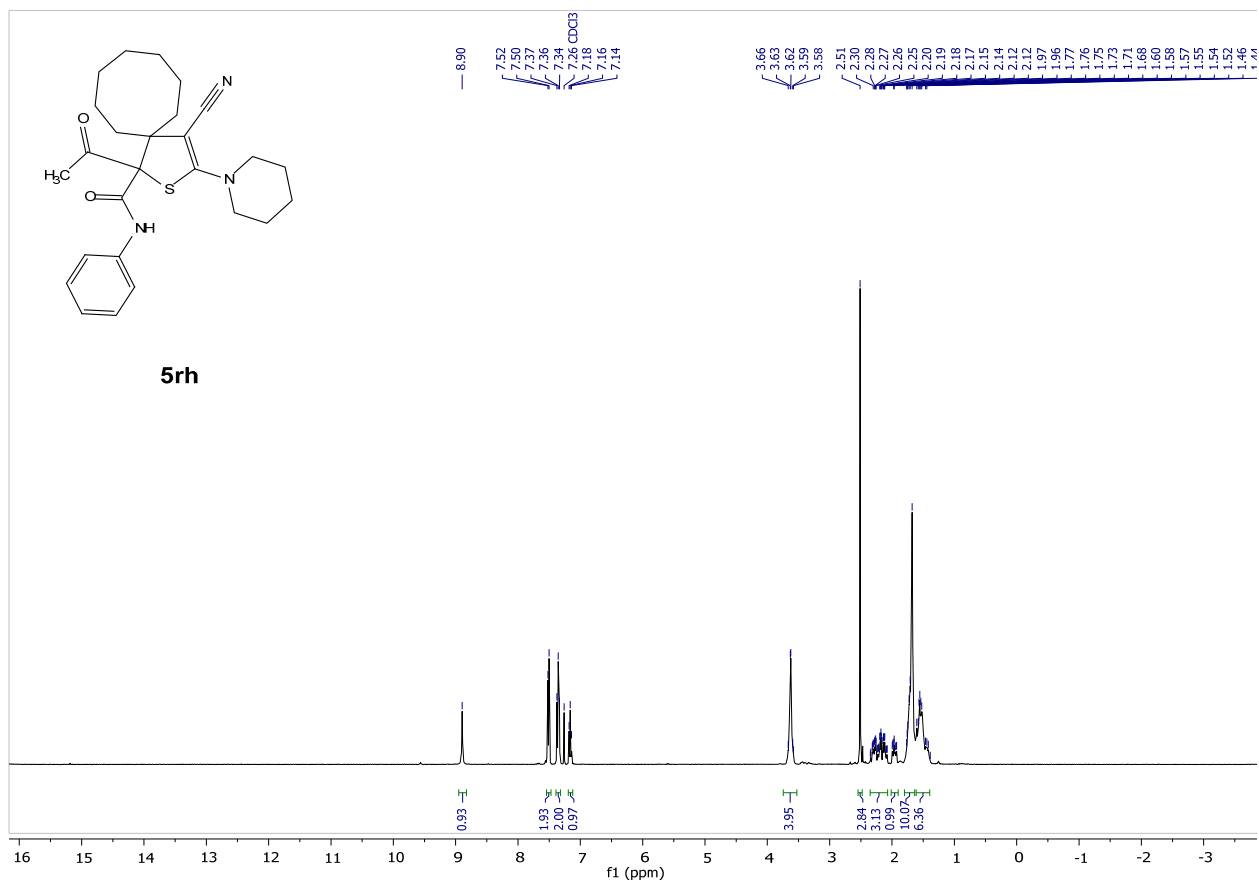

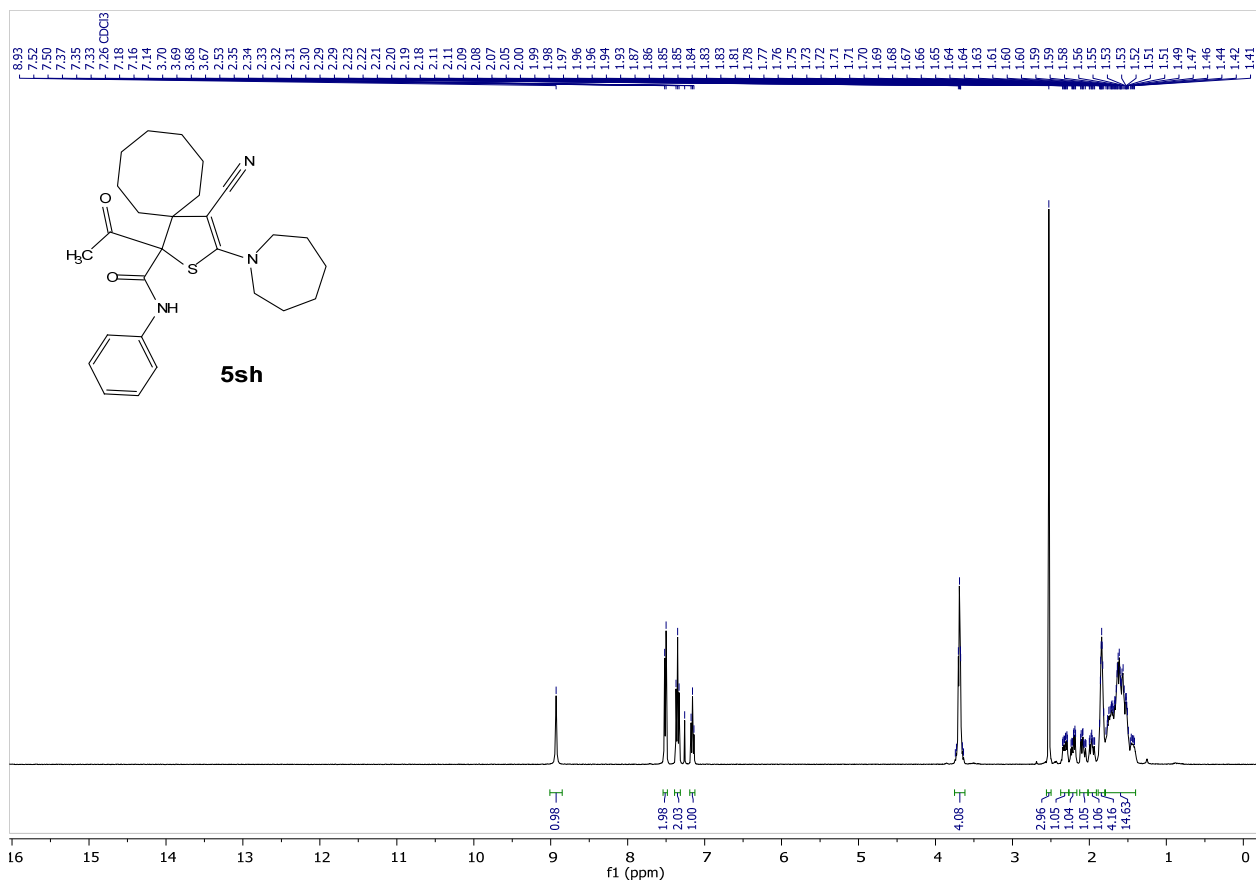

$^1\text{H}$  NMR (400 MHz,  $\text{CDCl}_3-d$ ) of **5sh**

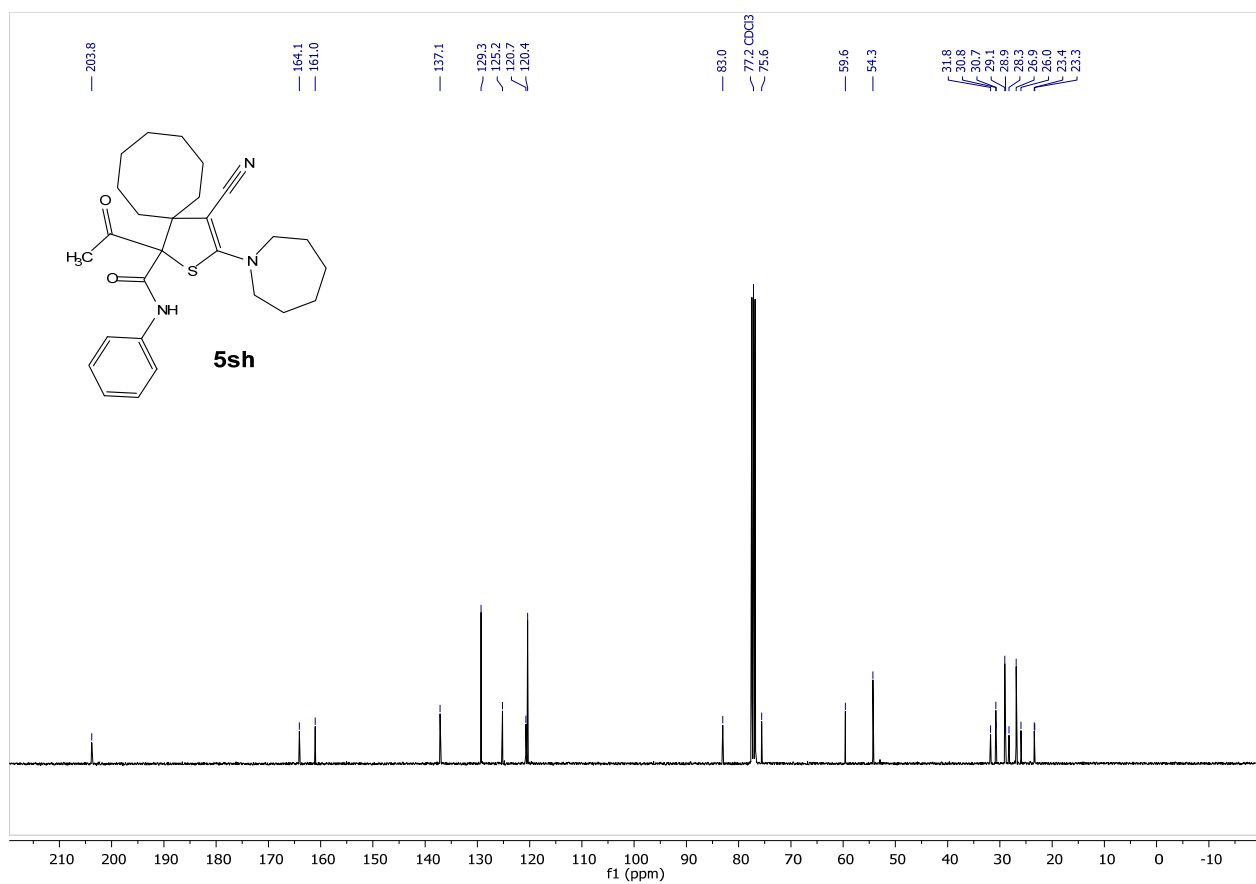

$^{13}\text{C}\{^1\text{H}\}$  NMR (100 MHz,  $\text{CDCl}_3-d$ ) of **5sh**

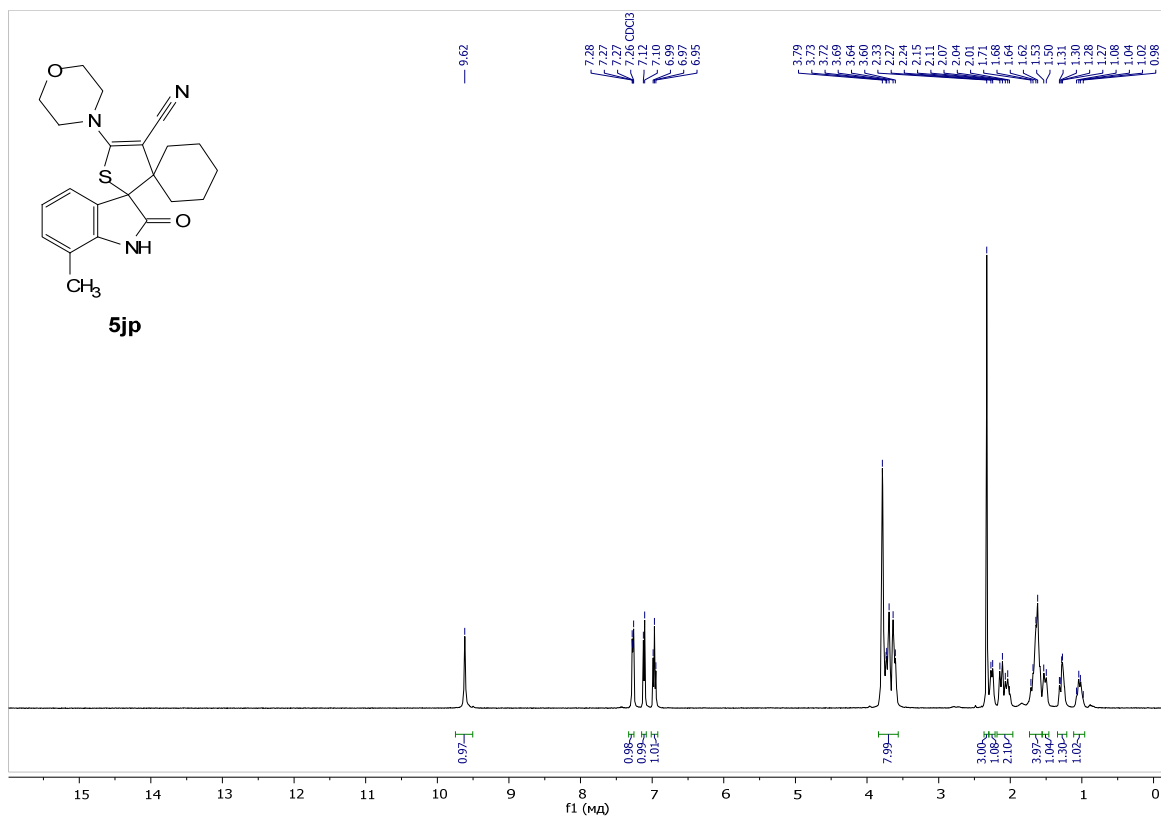

<sup>1</sup>H NMR (400 MHz, CDCl<sub>3</sub>-d) of **5jp**

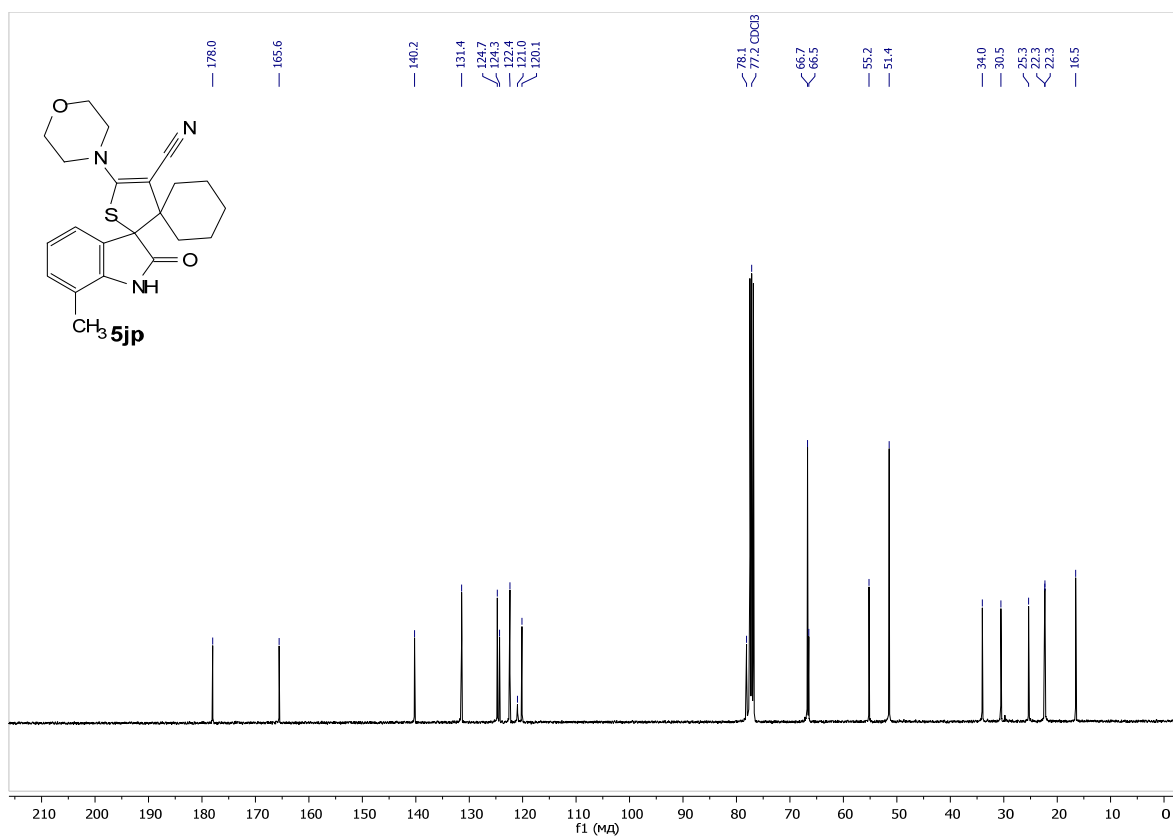

<sup>13</sup>C {<sup>1</sup>H} NMR (100 MHz, CDCl<sub>3</sub>-d) of **5jp**

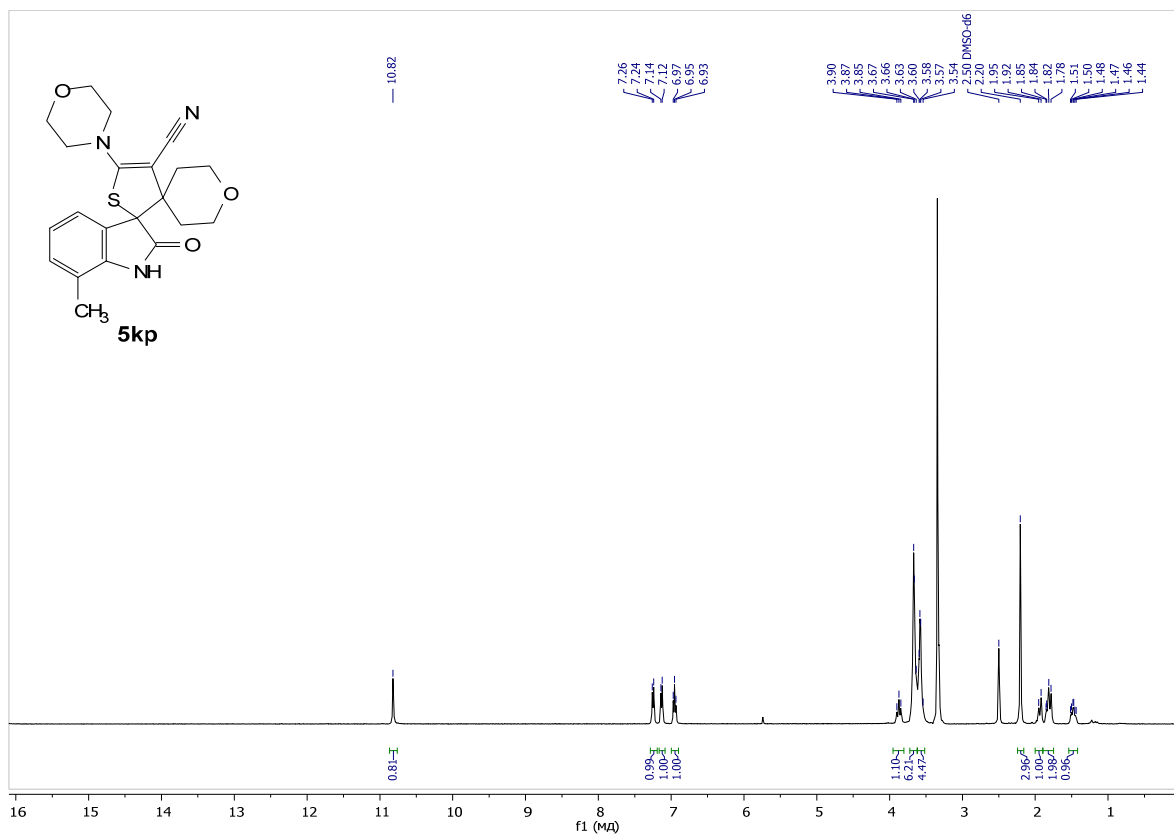

<sup>1</sup>H NMR (400 MHz, DMSO-*d*<sub>6</sub>) of **5kp**

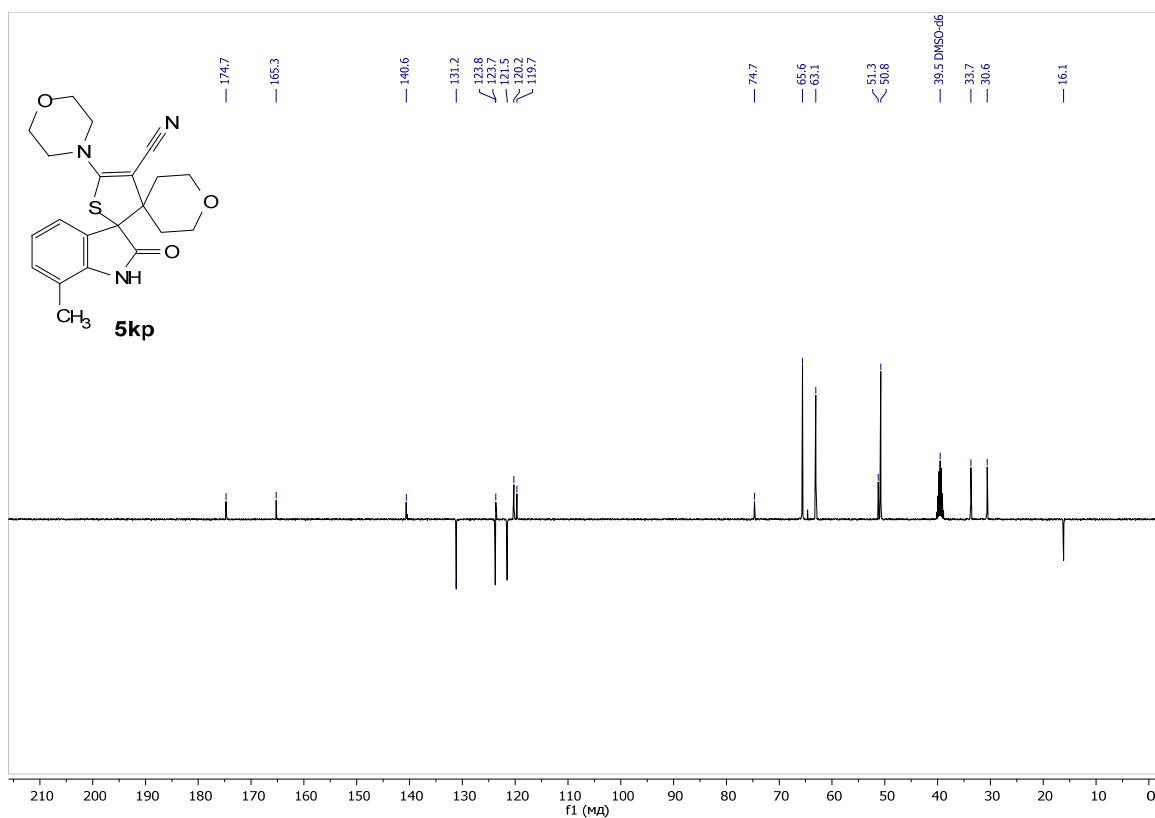

<sup>13</sup>C {<sup>1</sup>H} NMR (100 MHz, DMSO-*d*<sub>6</sub>) of **5kp**

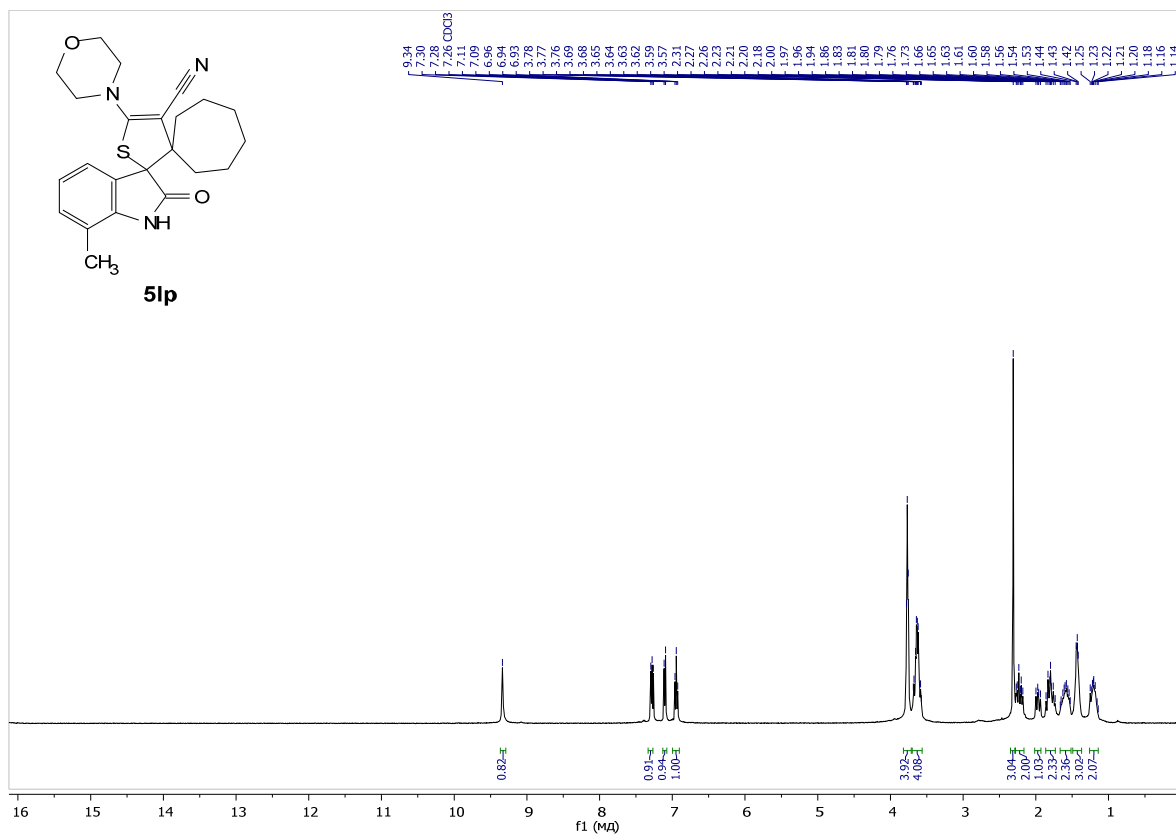

$^1\text{H NMR}$  (400 MHz,  $\text{CDCl}_3-d$ ) of **51p**

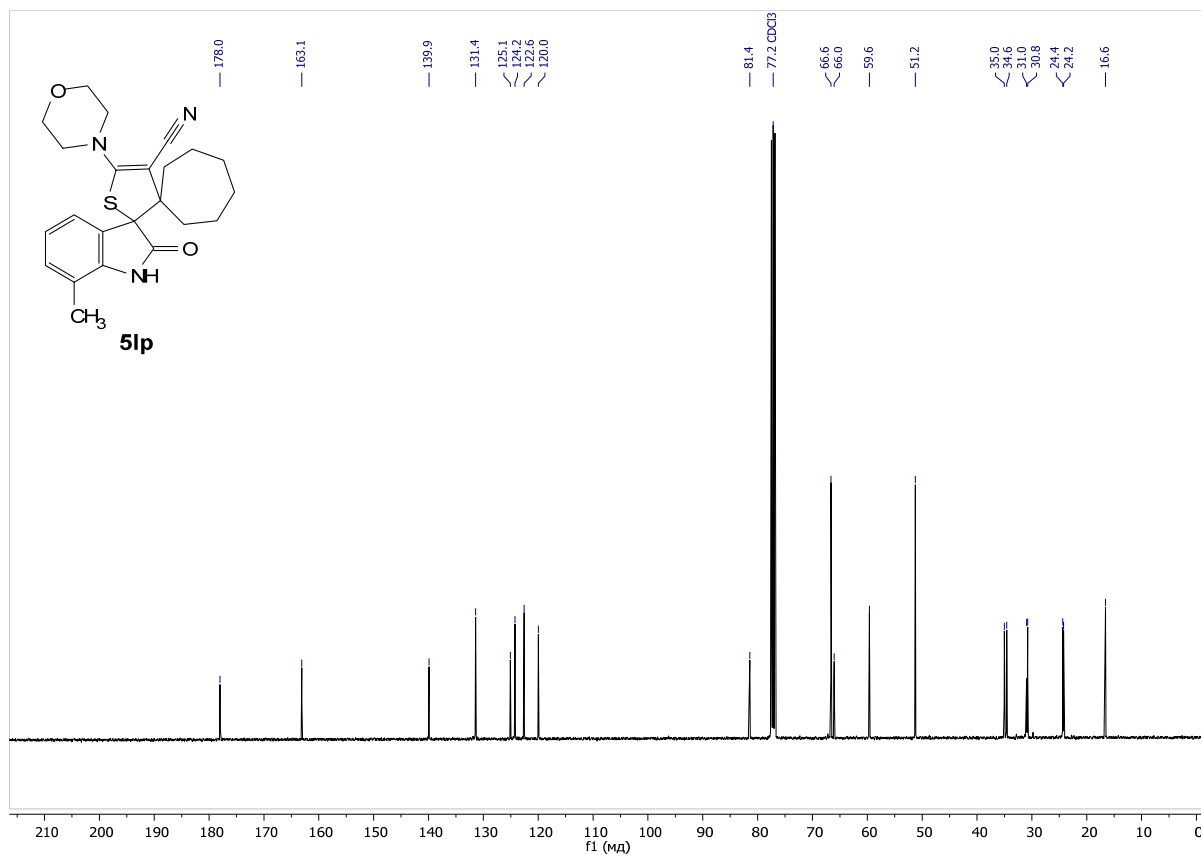

$^{13}\text{C}\{^1\text{H}\}$  NMR (100 MHz,  $\text{CDCl}_3-d$ ) of **51p**



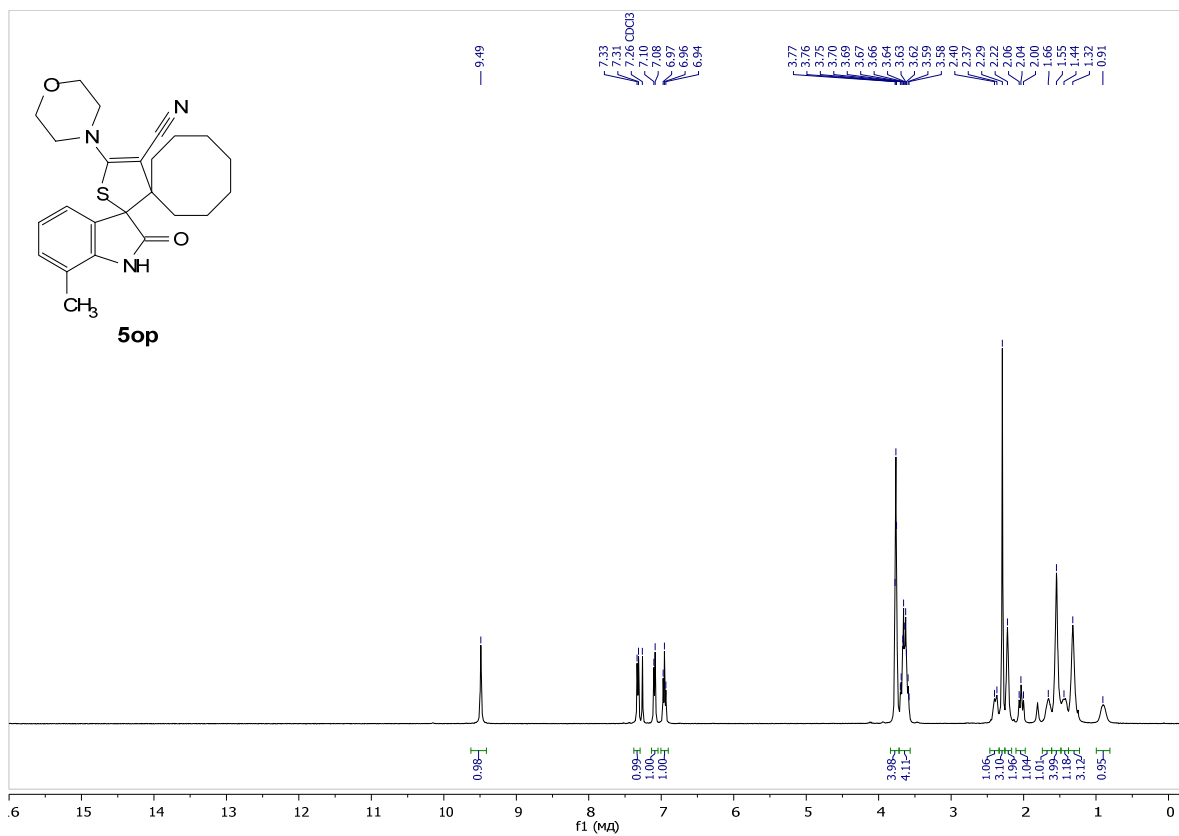

<sup>1</sup>H NMR (400 MHz, CDCl<sub>3</sub>-d) of **5op**

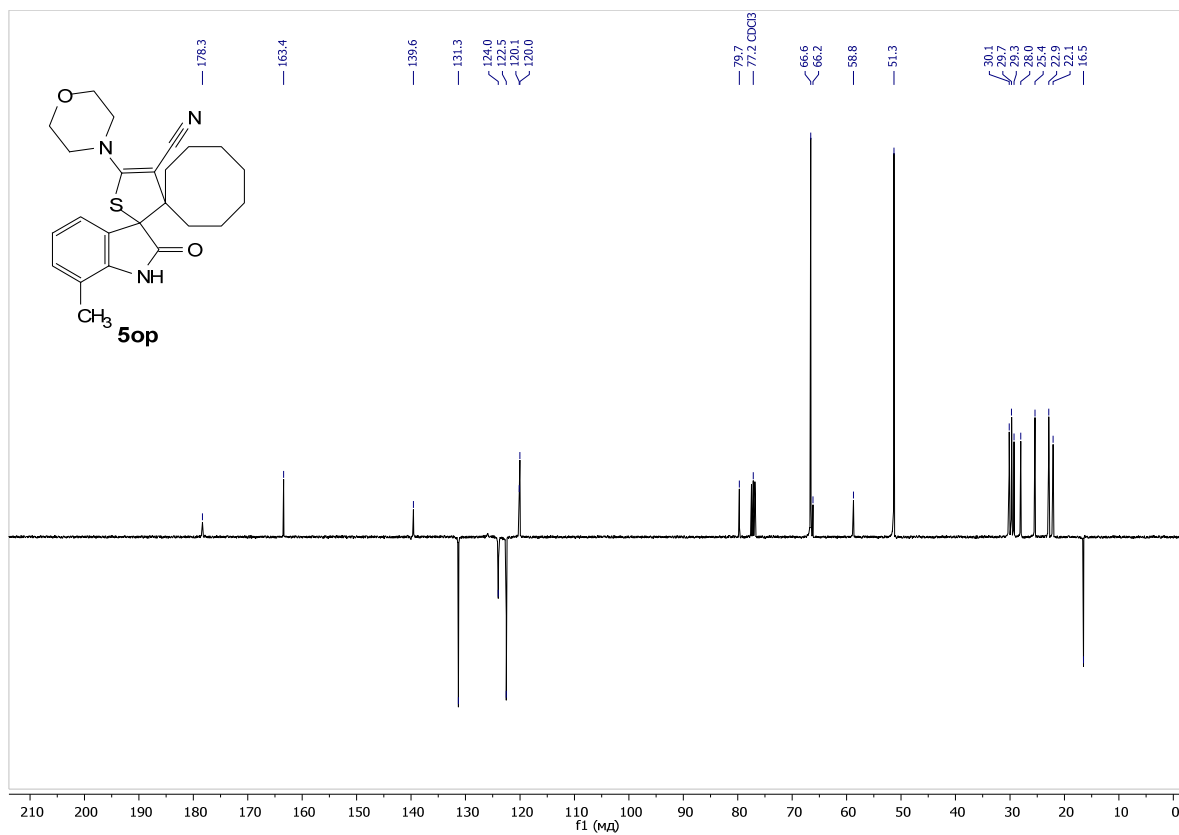

<sup>13</sup>C{<sup>1</sup>H} NMR (100 MHz, CDCl<sub>3</sub>-d) of **5op**

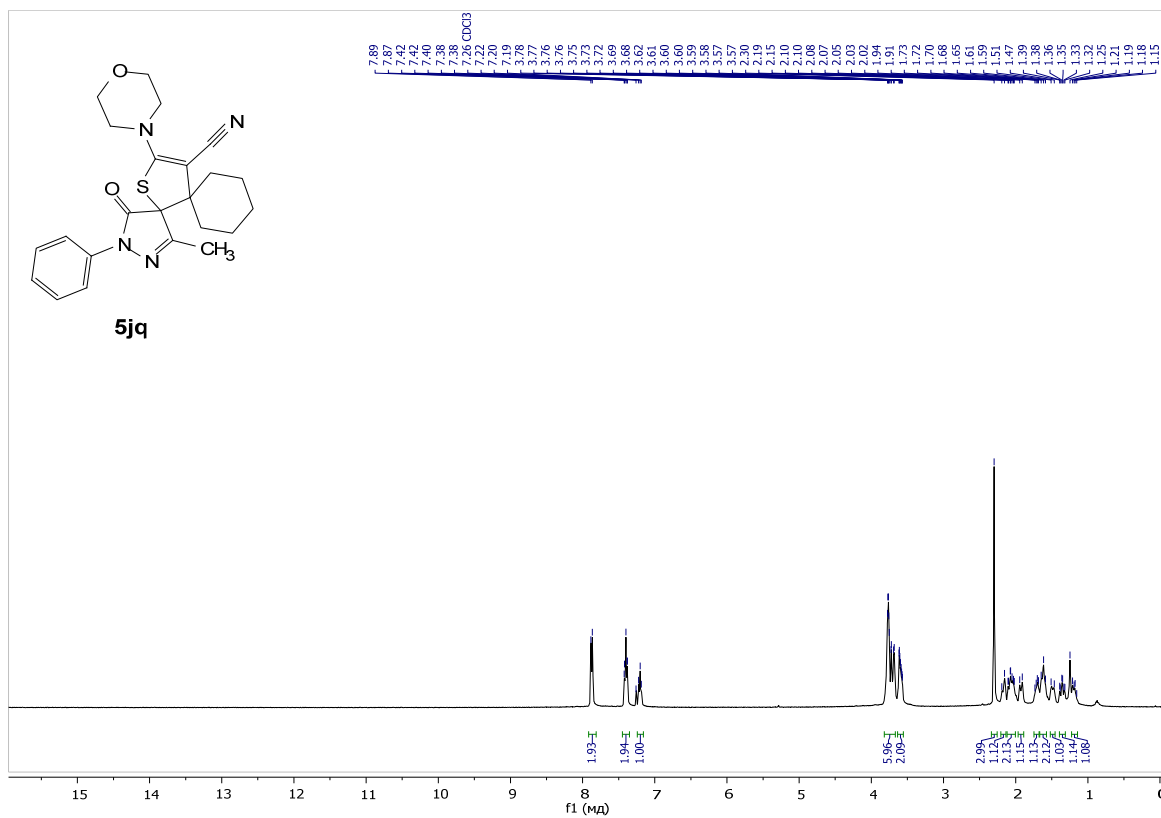

$^1\text{H NMR}$  (400 MHz,  $\text{CDCl}_3-d$ ) of **5jq**

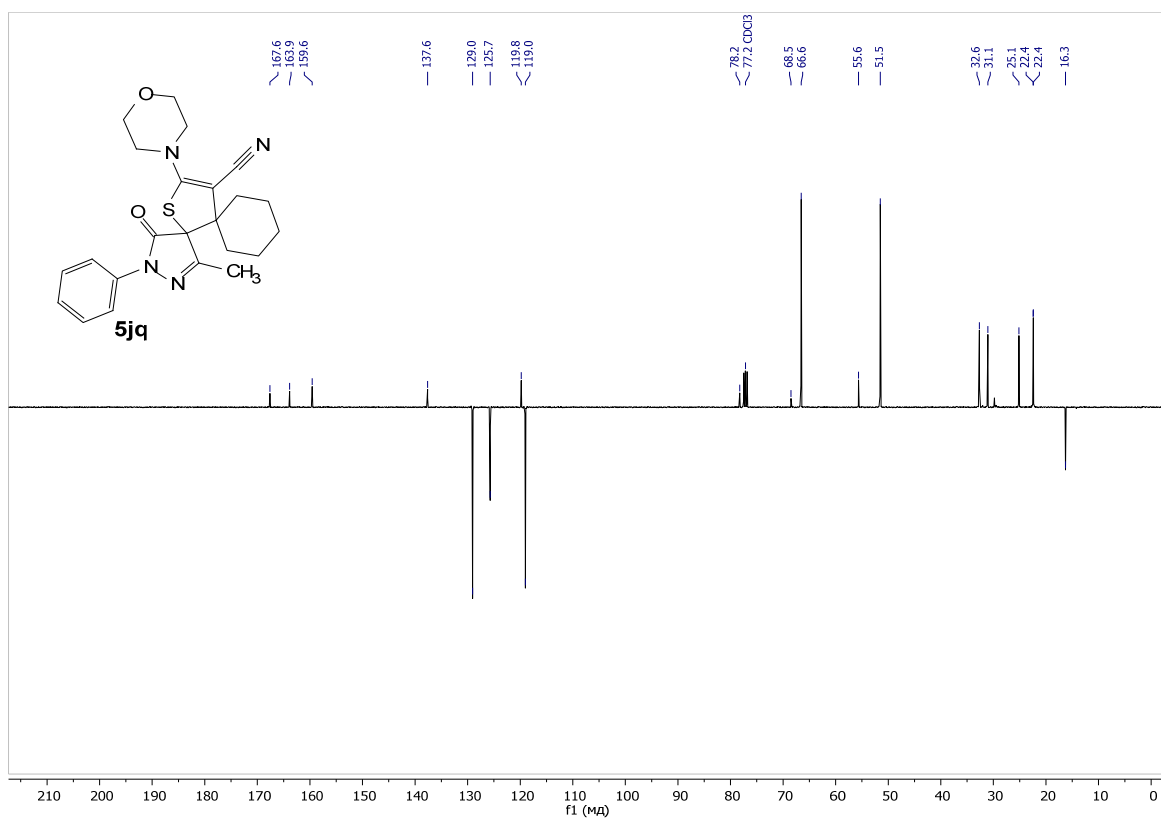

$^{13}\text{C}\{^1\text{H}\}$  NMR (100 MHz,  $\text{CDCl}_3-d$ ) of **5jq**

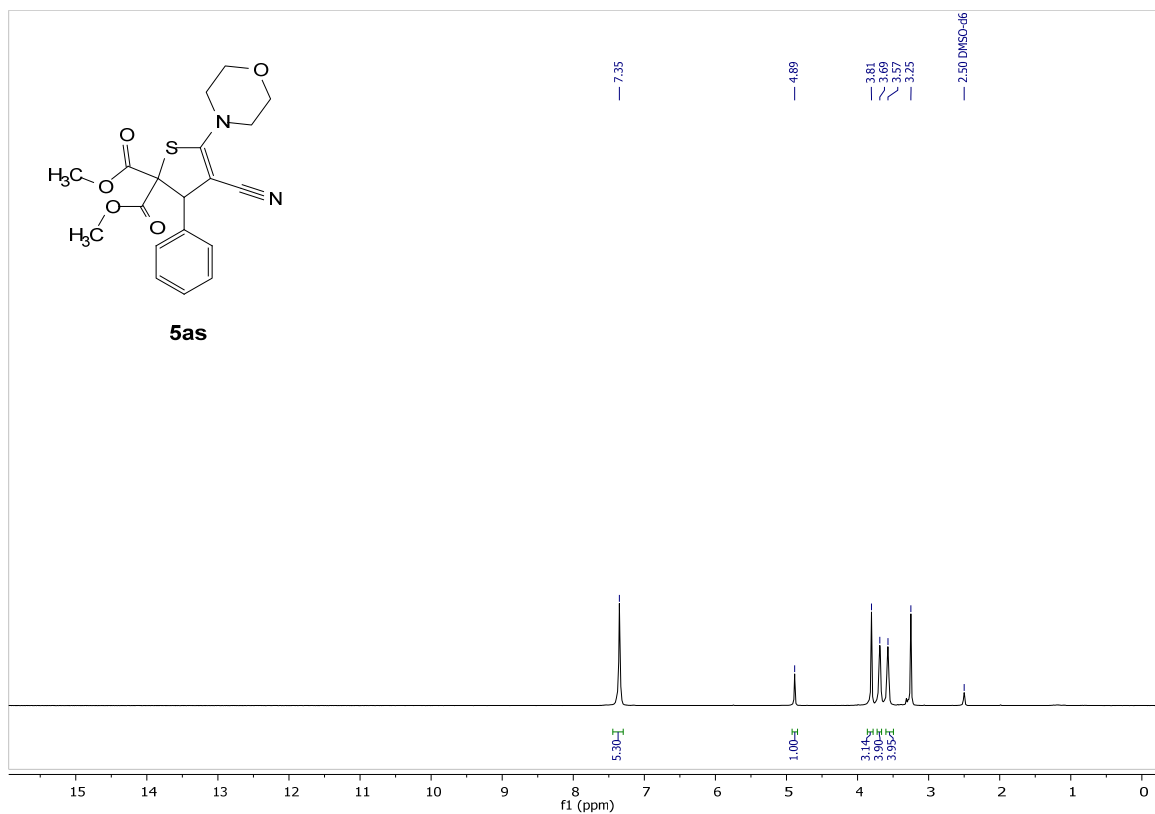

$^1\text{H NMR}$  (400 MHz,  $\text{DMSO-}d_6$ ) of **5as**

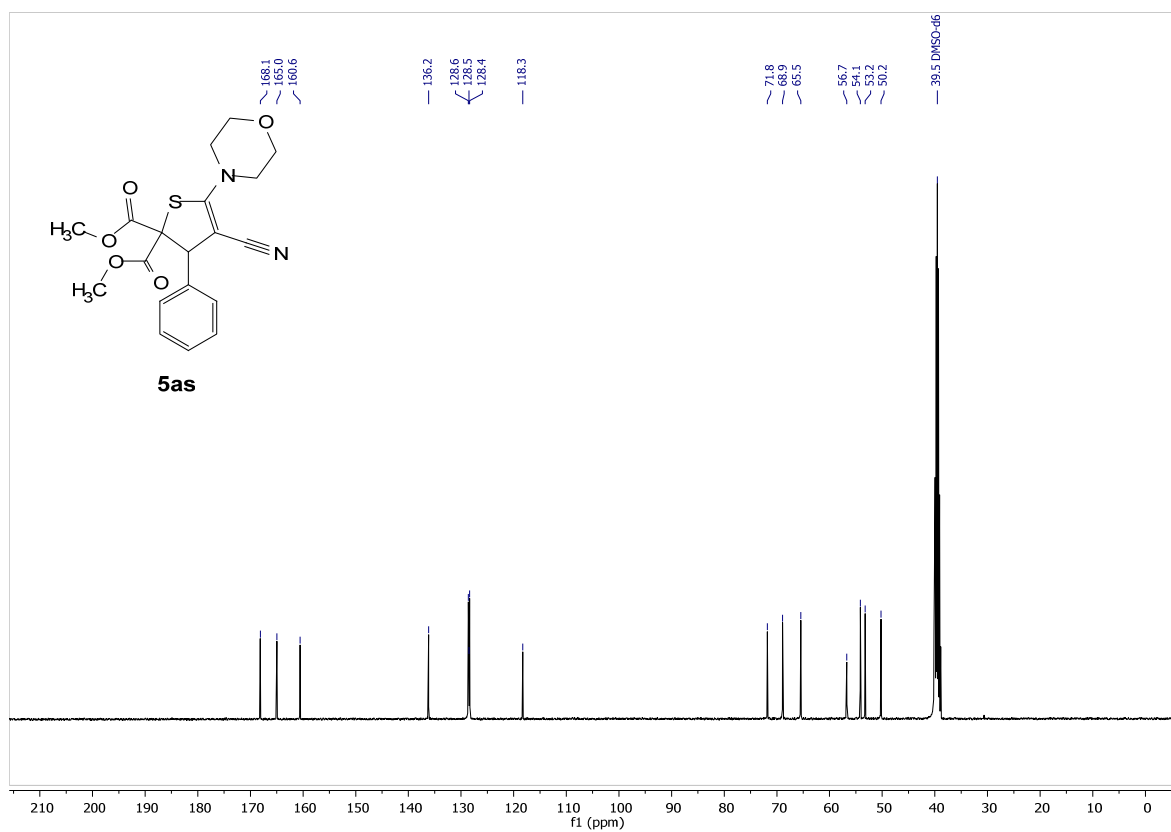

$^{13}\text{C}\{^1\text{H}\}$  NMR (100 MHz,  $\text{DMSO-}d_6$ ) of **5as**

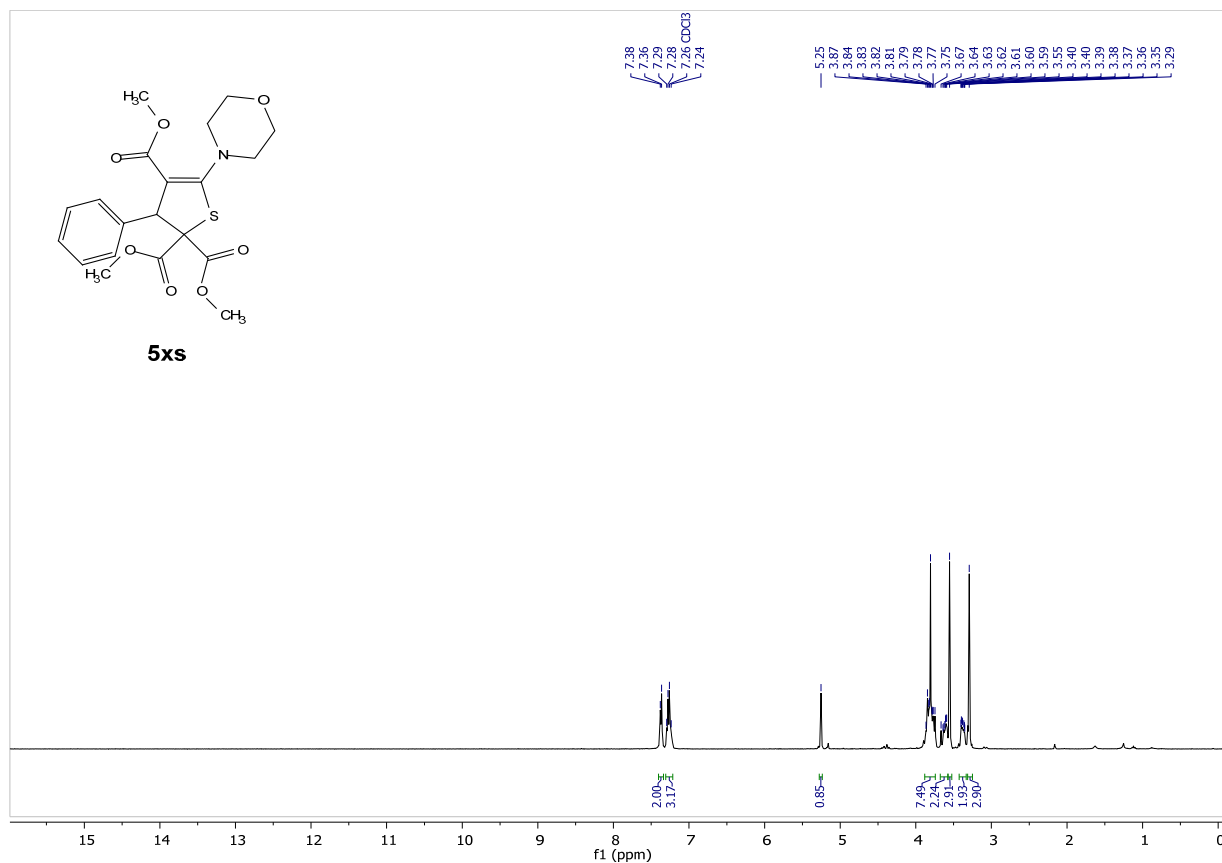

<sup>1</sup>H NMR (400 MHz, CDCl<sub>3</sub>-d) of **5xs**

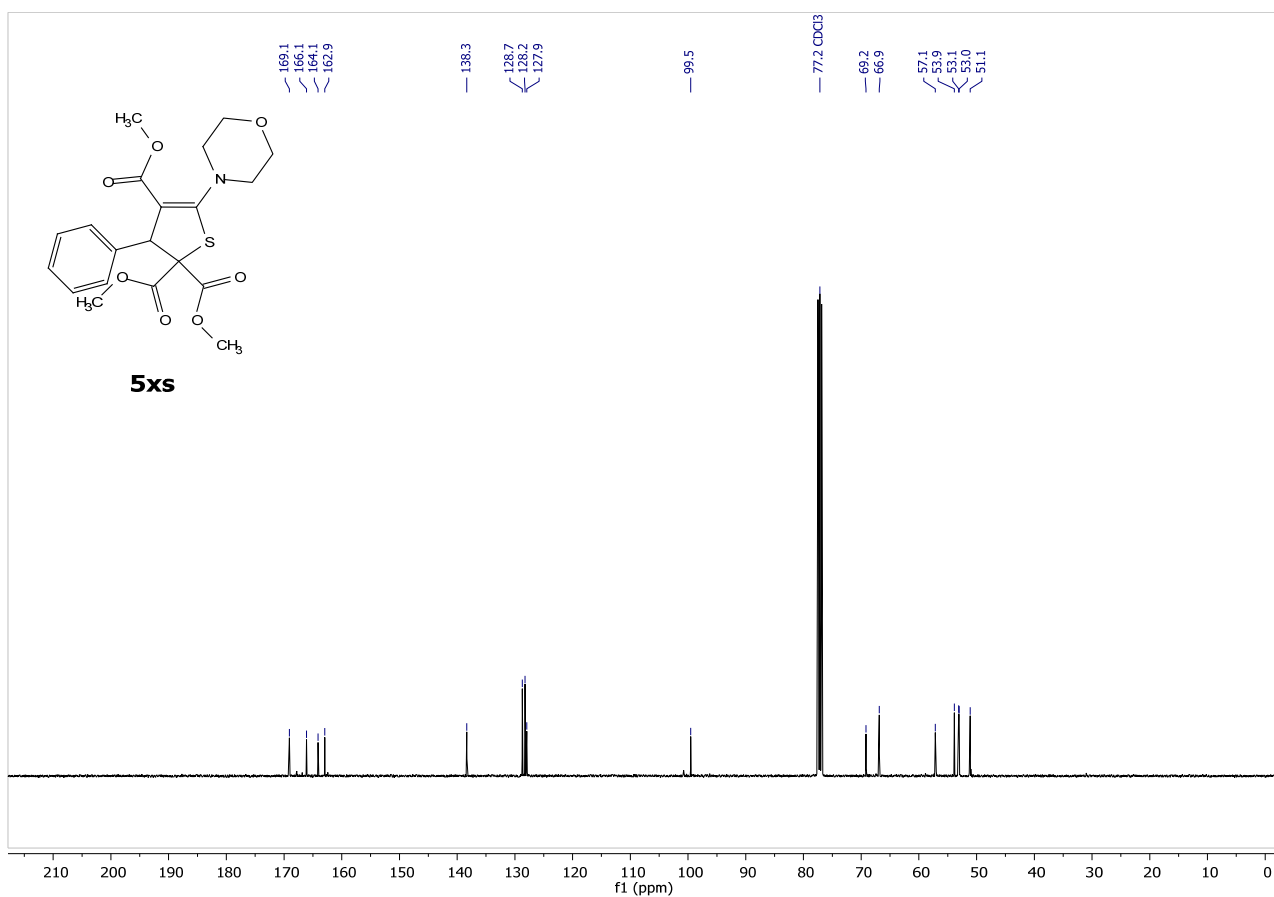

<sup>13</sup>C {<sup>1</sup>H} NMR (100 MHz, CDCl<sub>3</sub>-d) of **5xs**

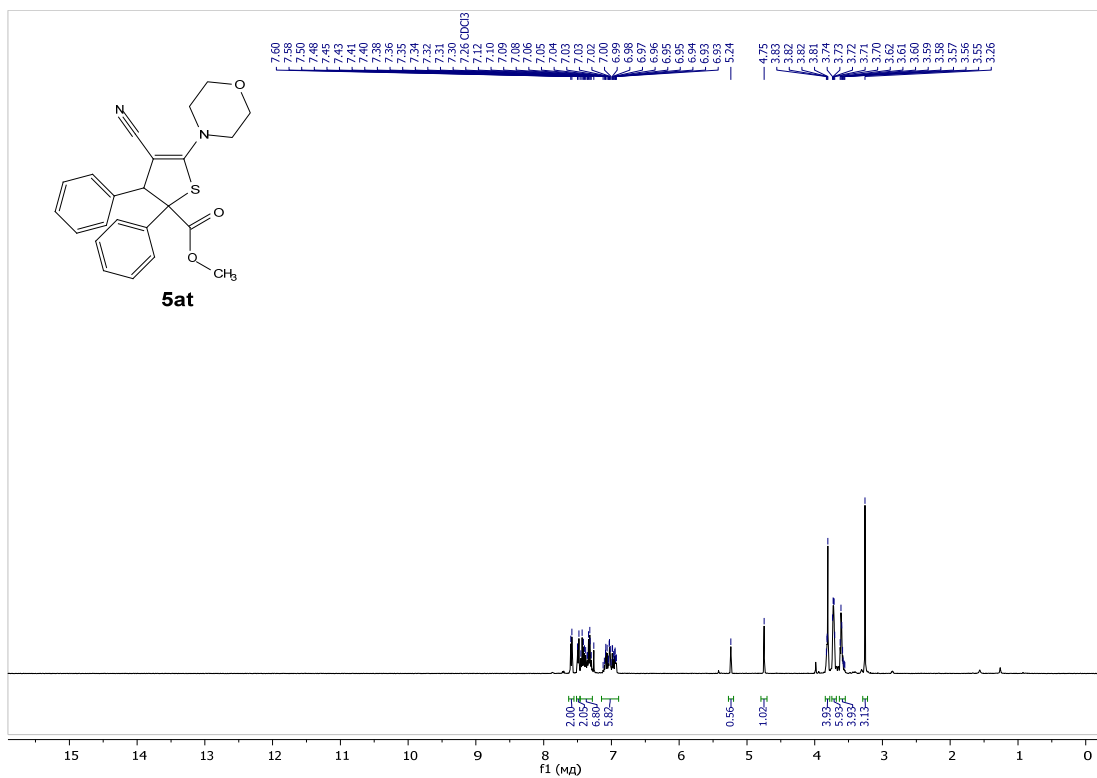

<sup>1</sup>H NMR (400 MHz, CDCl<sub>3</sub>-d) of **5at**

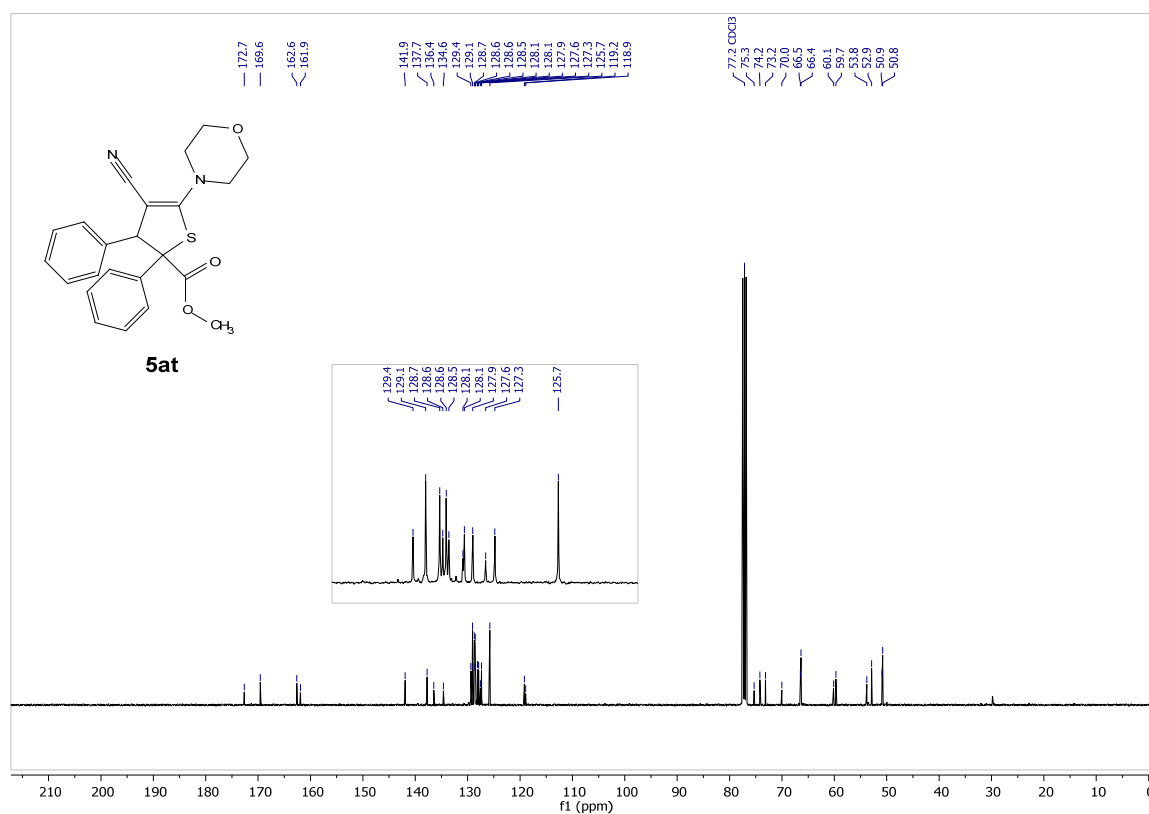

<sup>13</sup>C {<sup>1</sup>H} NMR (100 MHz, CDCl<sub>3</sub>-d) of **5at**

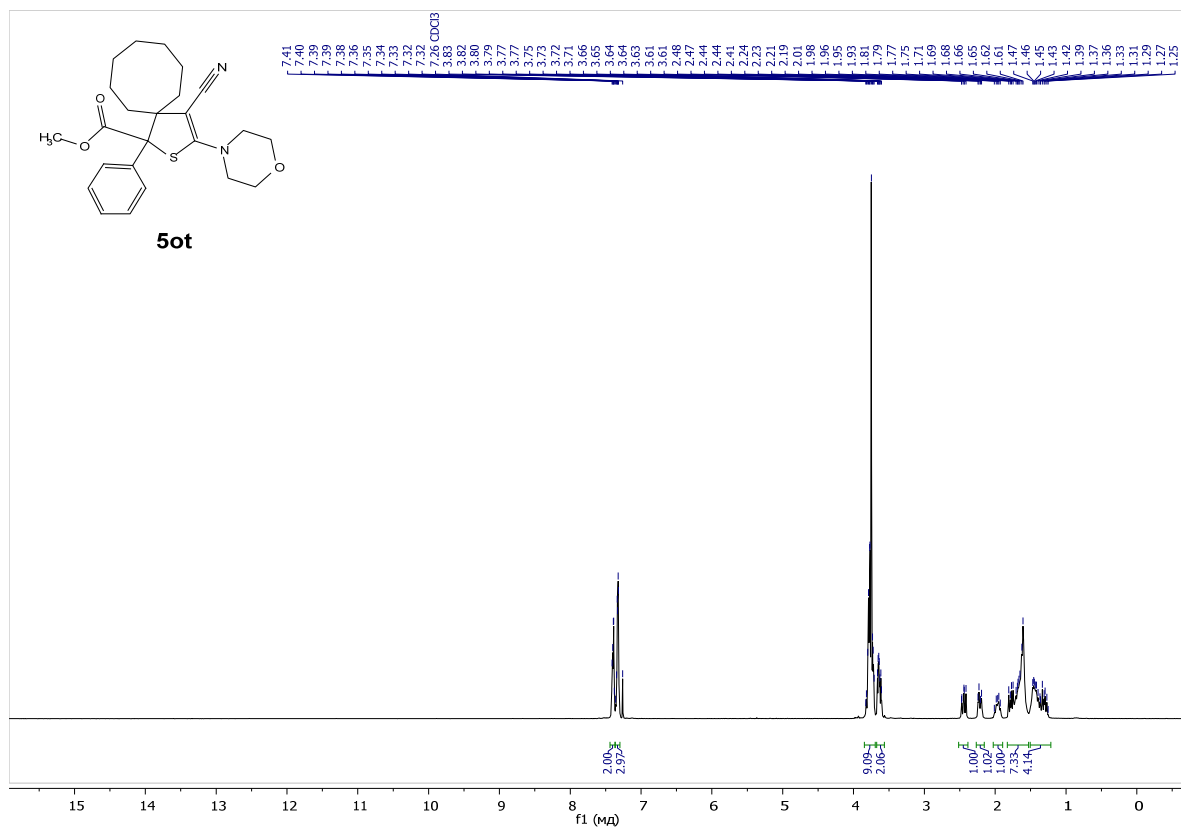

<sup>1</sup>H NMR (400 MHz, CDCl<sub>3</sub>-d) of **5ot**

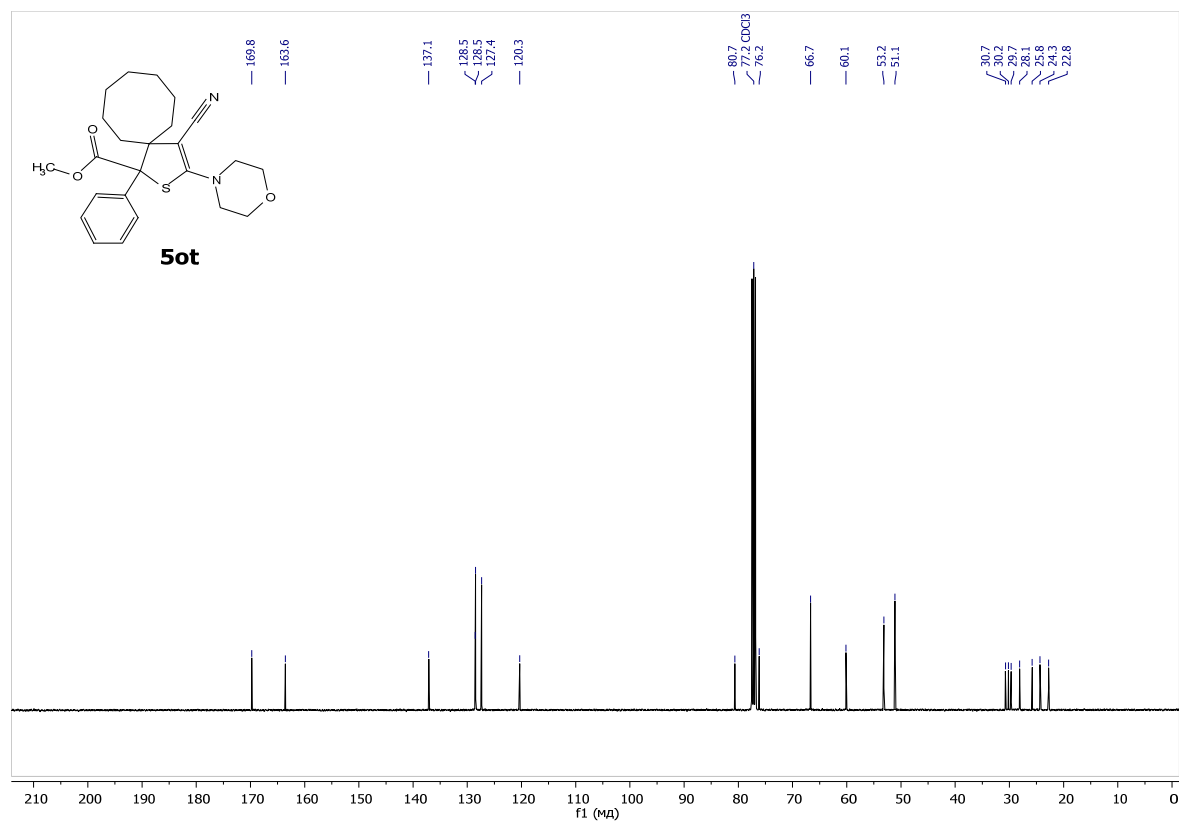

<sup>13</sup>C {<sup>1</sup>H} NMR (100 MHz, CDCl<sub>3</sub>-d) of **5ot**

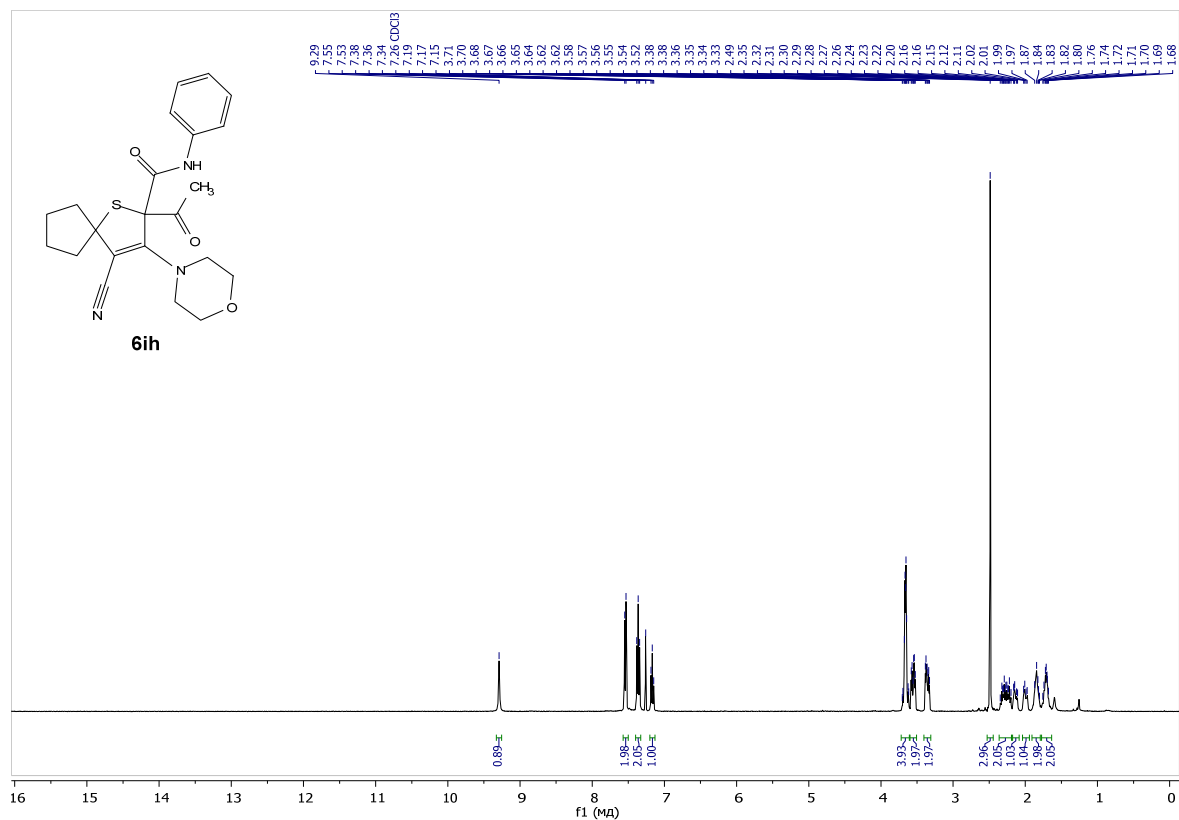

<sup>1</sup>H NMR (400 MHz, CDCl<sub>3</sub>-d) of **6ih**

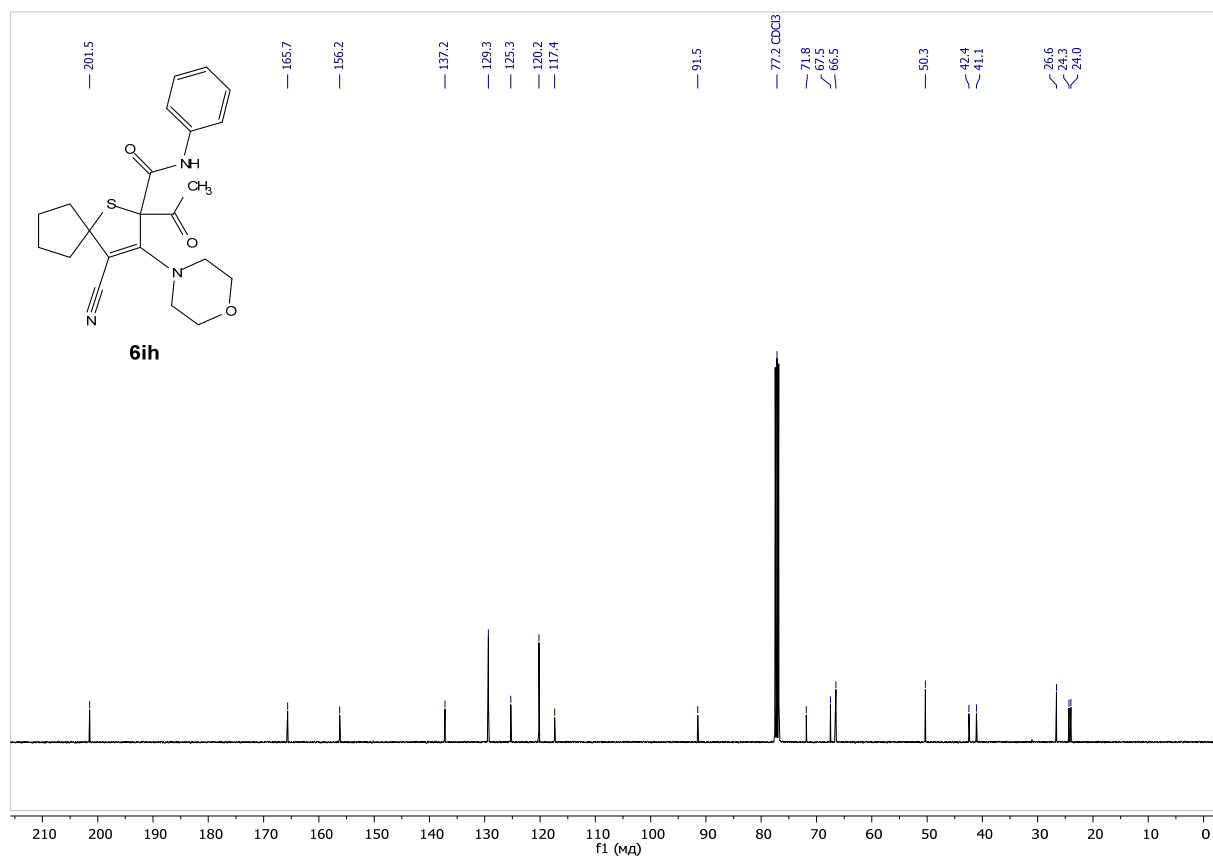

<sup>13</sup>C {<sup>1</sup>H} NMR (100 MHz, CDCl<sub>3</sub>-d) of **6ih**

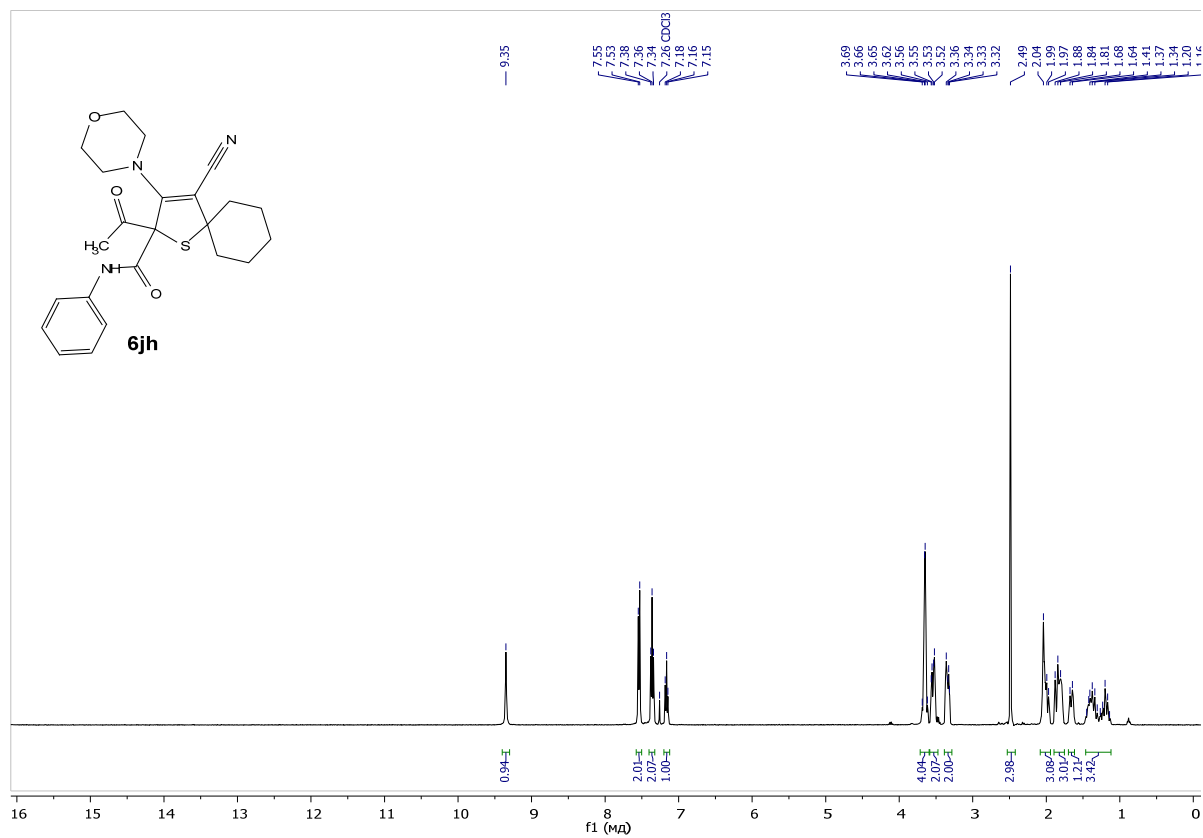

$^1\text{H}$  NMR (400 MHz,  $\text{CDCl}_3$ -*d*) of **6jh**

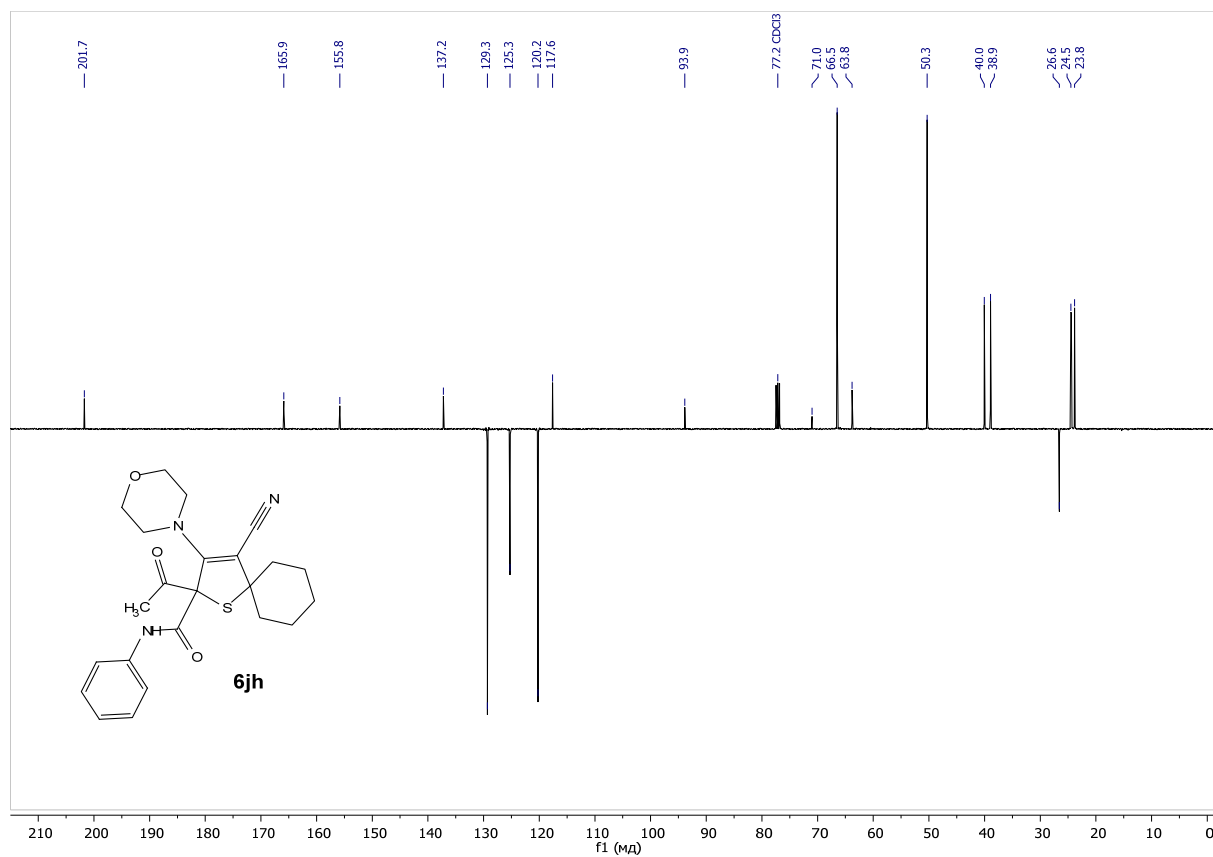

$^{13}\text{C}\{^1\text{H}\}$  NMR (100 MHz,  $\text{CDCl}_3$ -*d*) of **6jh**



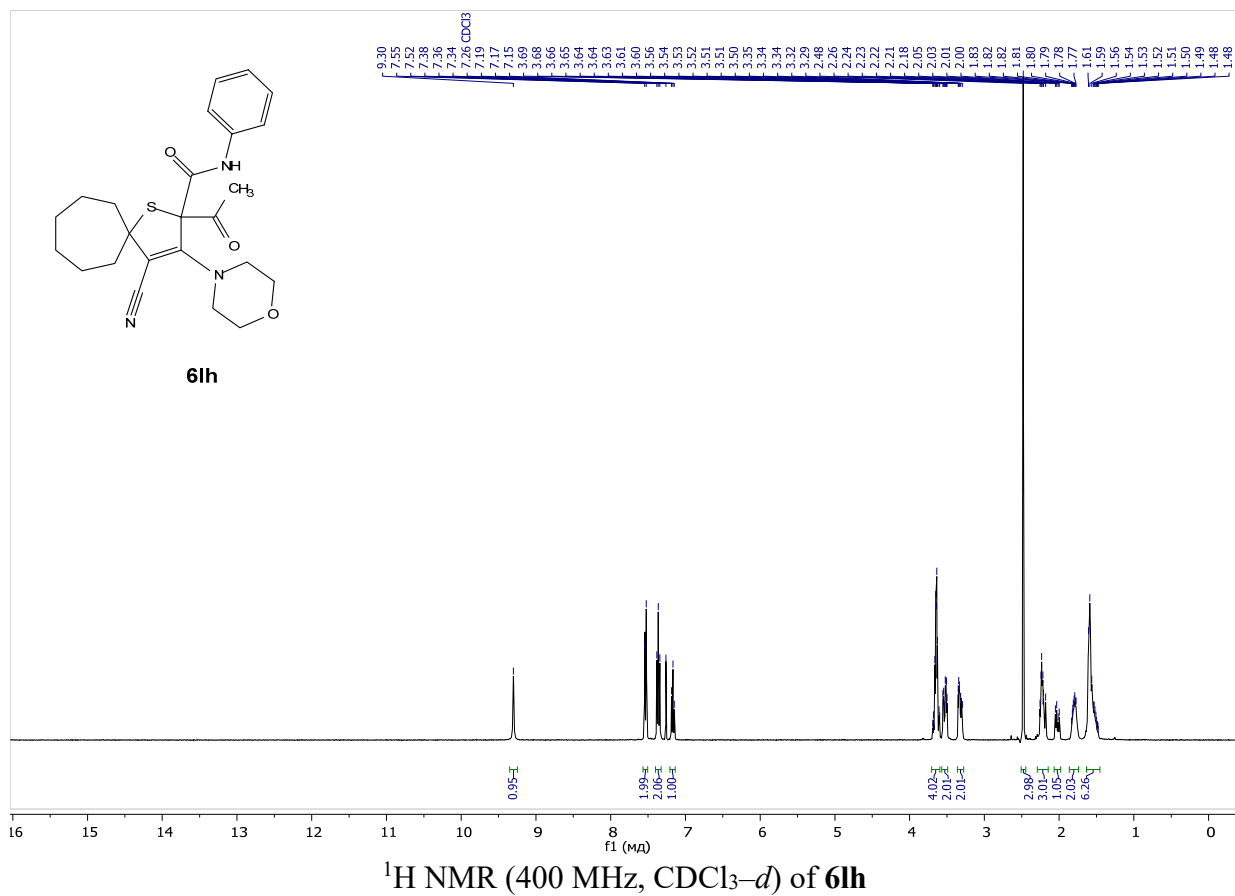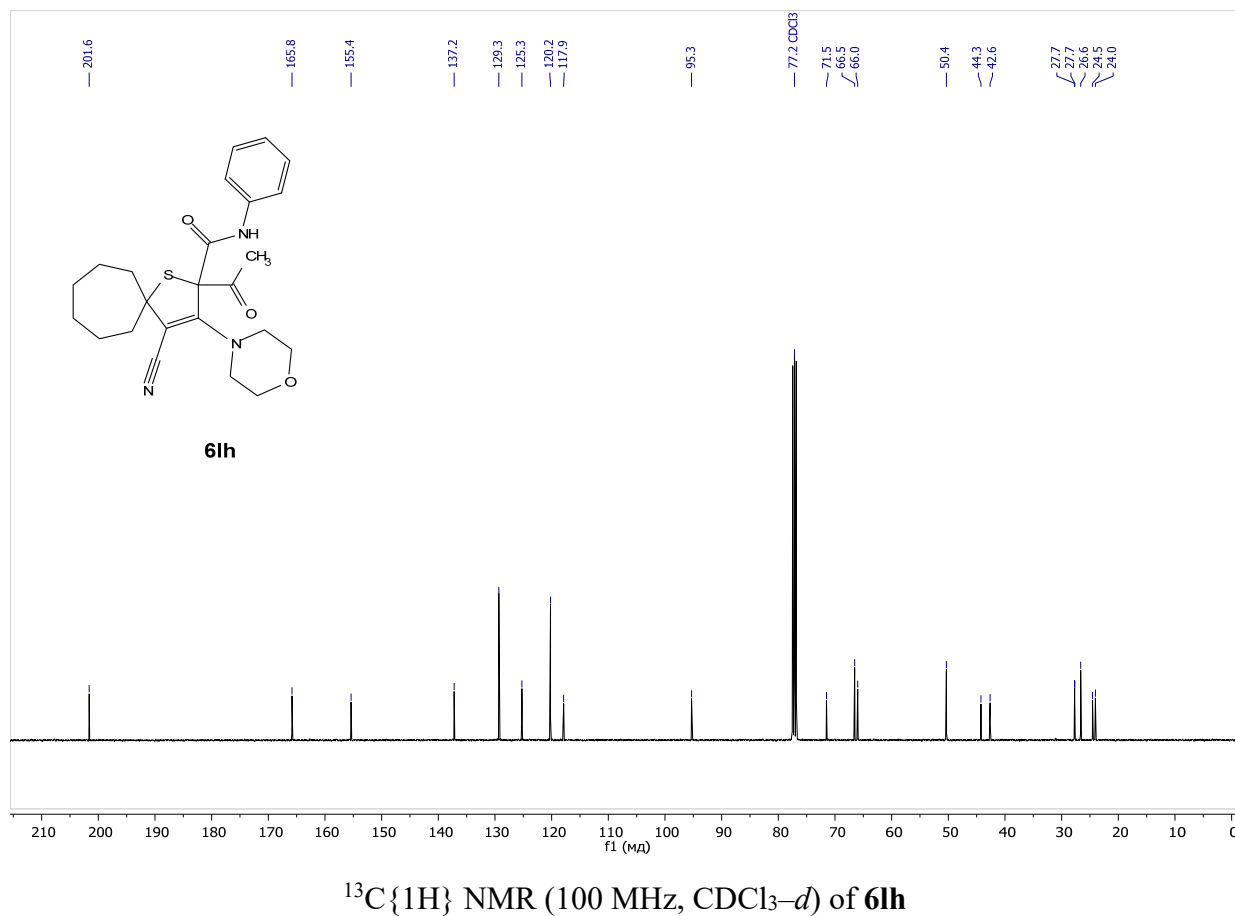

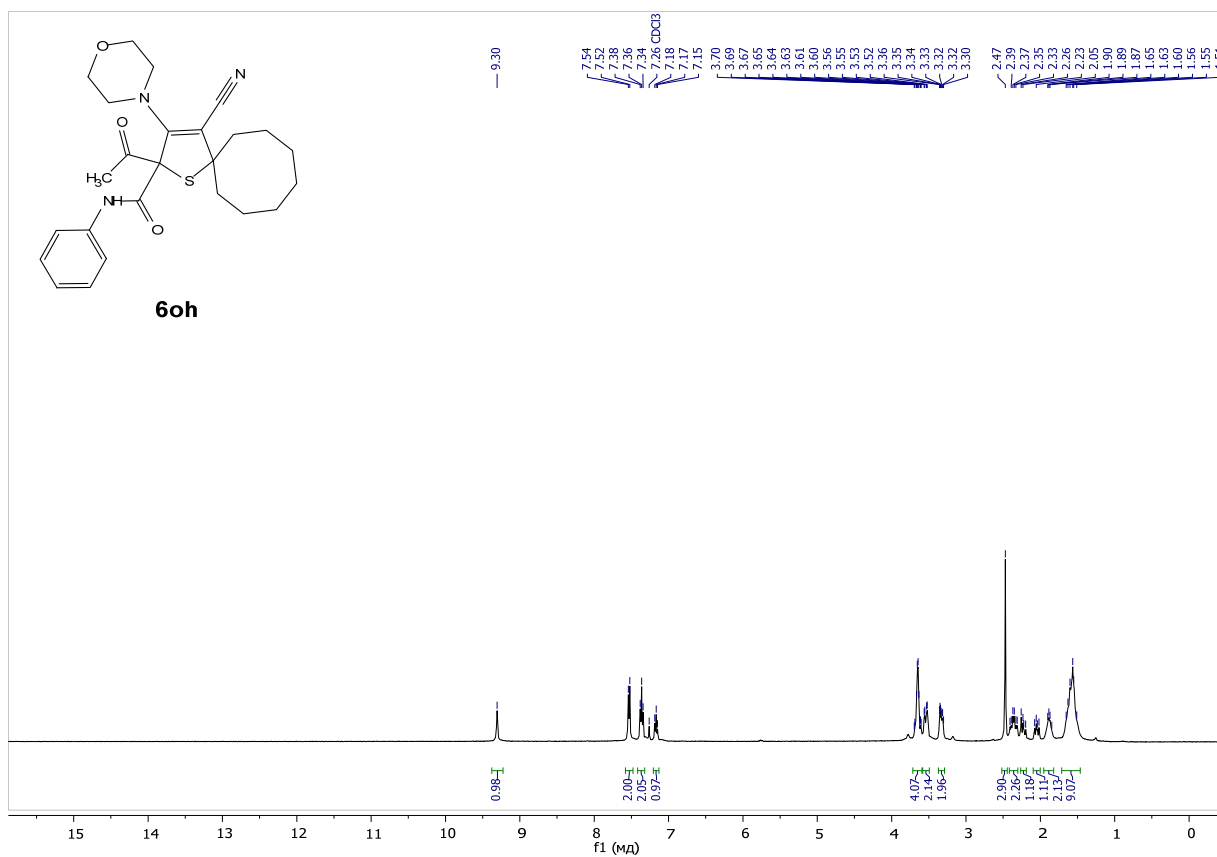

$^1\text{H}$  NMR (400 MHz,  $\text{CDCl}_3-d$ ) of **6oh**

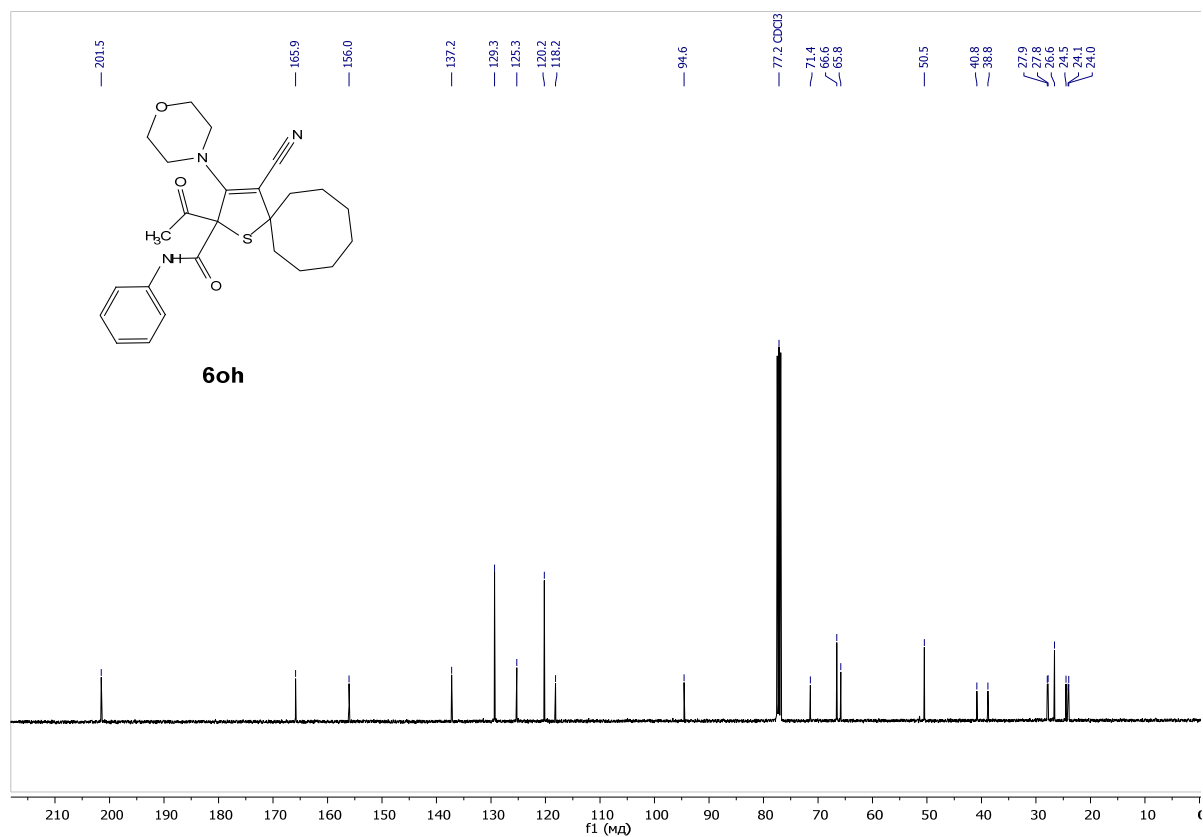

$^{13}\text{C}\{^1\text{H}\}$  NMR (100 MHz,  $\text{CDCl}_3-d$ ) of **6oh**

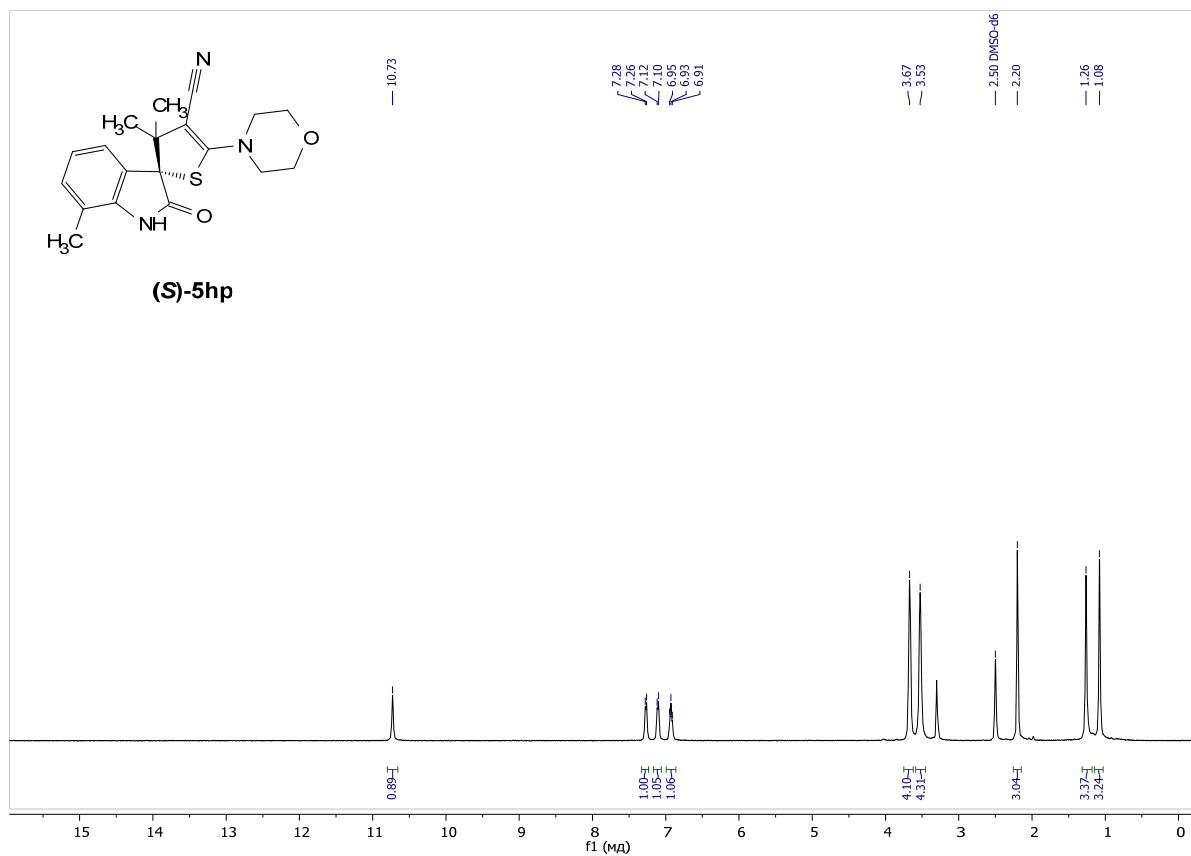

$^1\text{H}$  NMR (400 MHz,  $\text{DMSO-}d_6$ ) of **(S)-5hp**

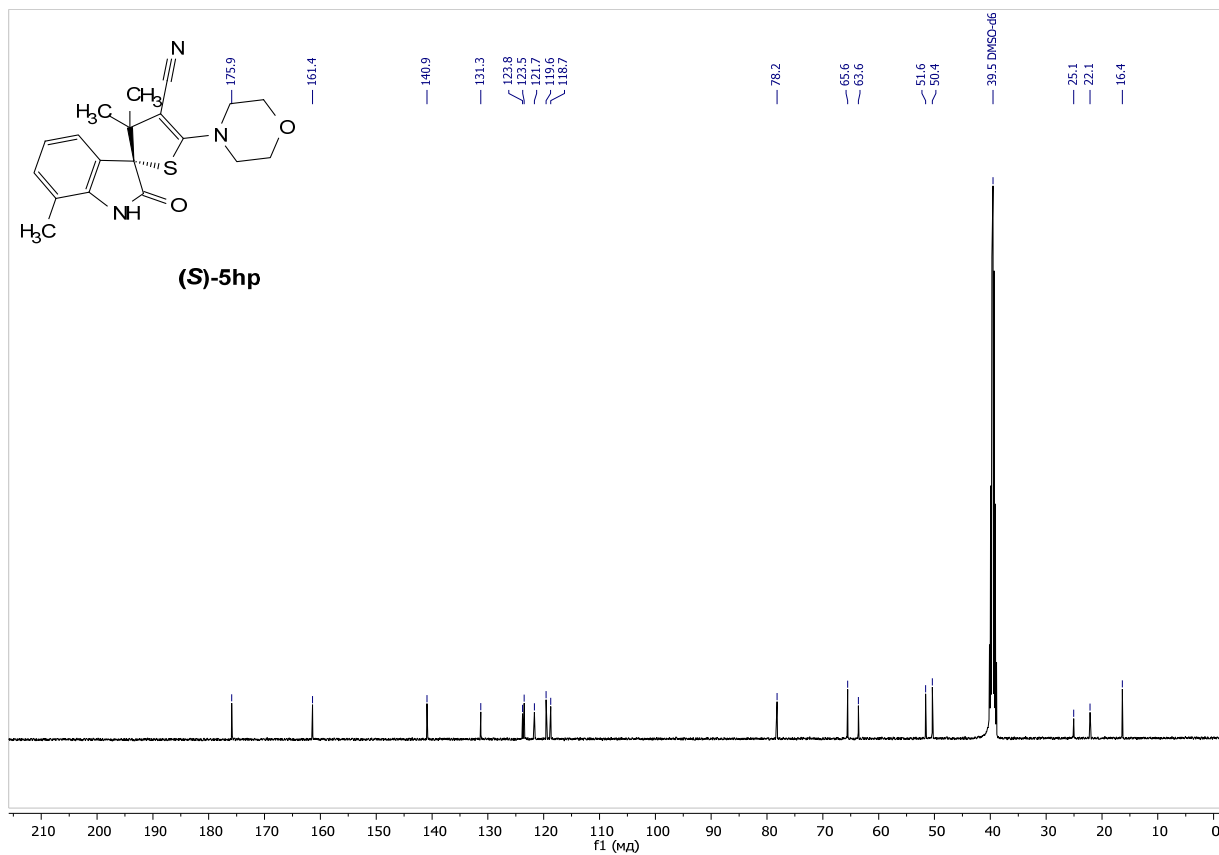

$^{13}\text{C}$  NMR (100 MHz,  $\text{DMSO-}d_6$ ) of **(S)-5hp**

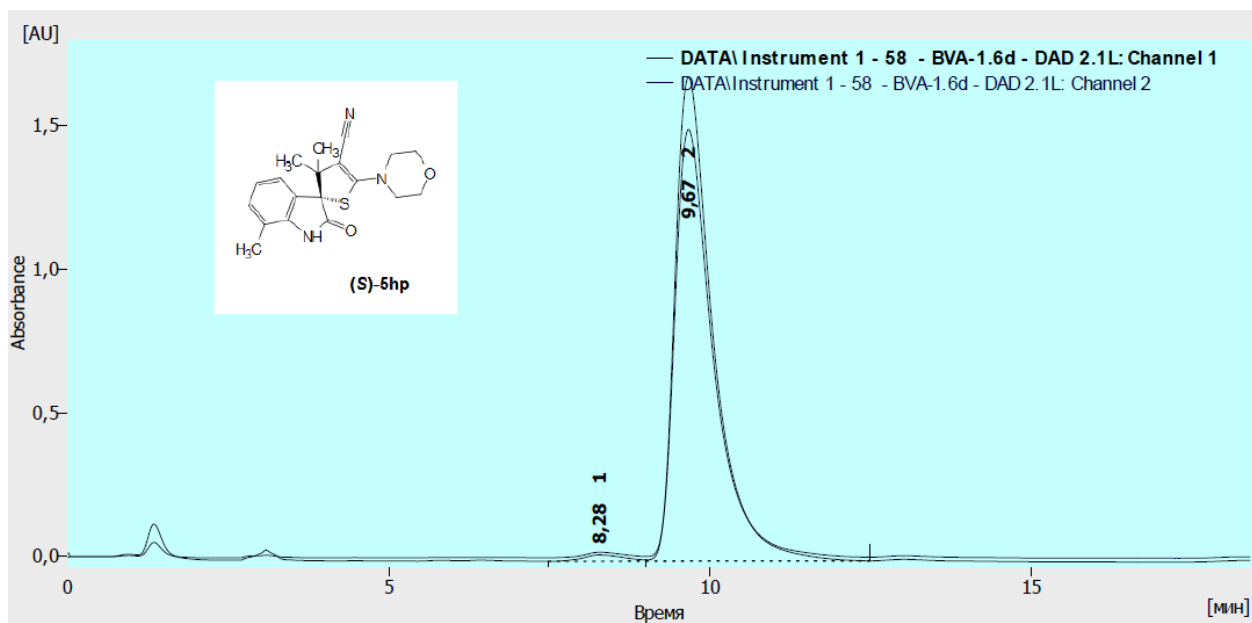

Таблица результатов (Без калибровки - DATA\Instrument 1 - 58 - BVA-1.6d - DAD 2.1L: Channel 1)

|   | Время уд.<br>[мин] | Площадь<br>[mAU.сек] | Высота<br>[mAU] | Площадь<br>[%] | W05<br>[мин] | Название вещества |
|---|--------------------|----------------------|-----------------|----------------|--------------|-------------------|
| 1 | 8,283              | 959,138              | 21,900          | 1,4            | 0,72         |                   |
| 2 | 9,667              | 69699,615            | 1686,517        | 98,6           | 0,62         |                   |
|   | Суммарное значение | 70658,753            | 1708,417        | 100,0          |              |                   |

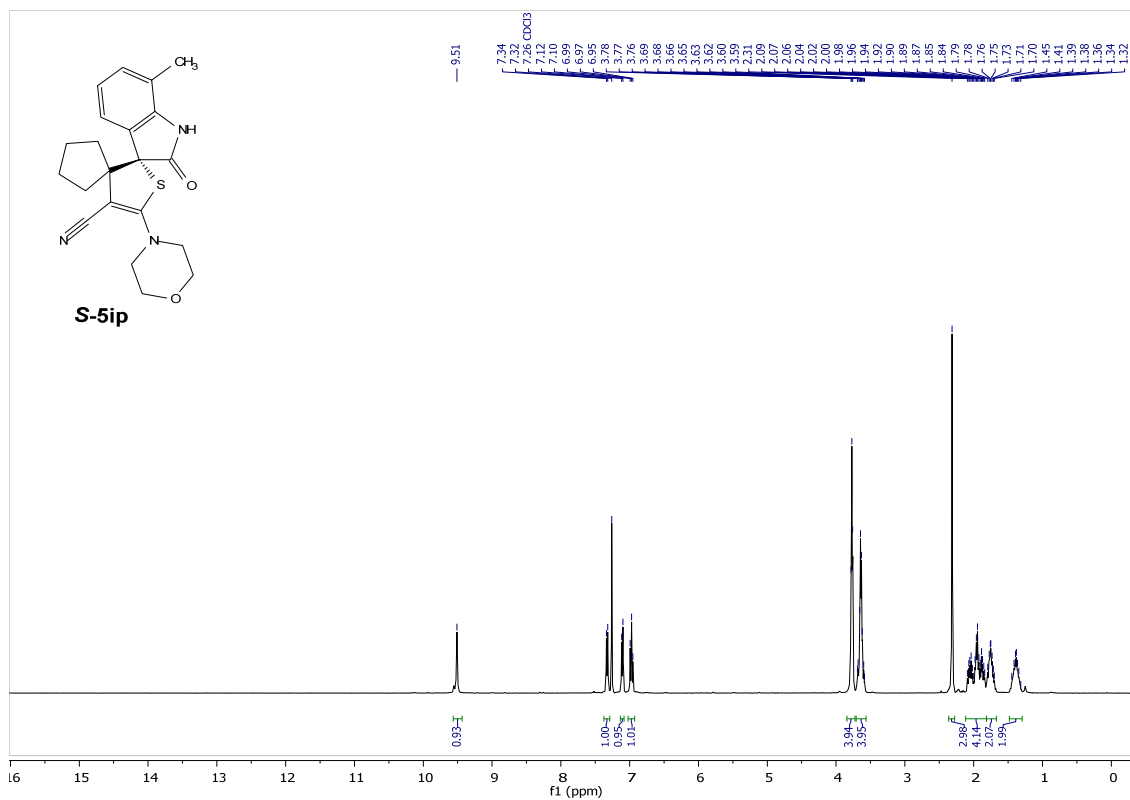

$^1\text{H}$  NMR (400 MHz,  $\text{CDCl}_3-d$ ) of **(S)-5ip**

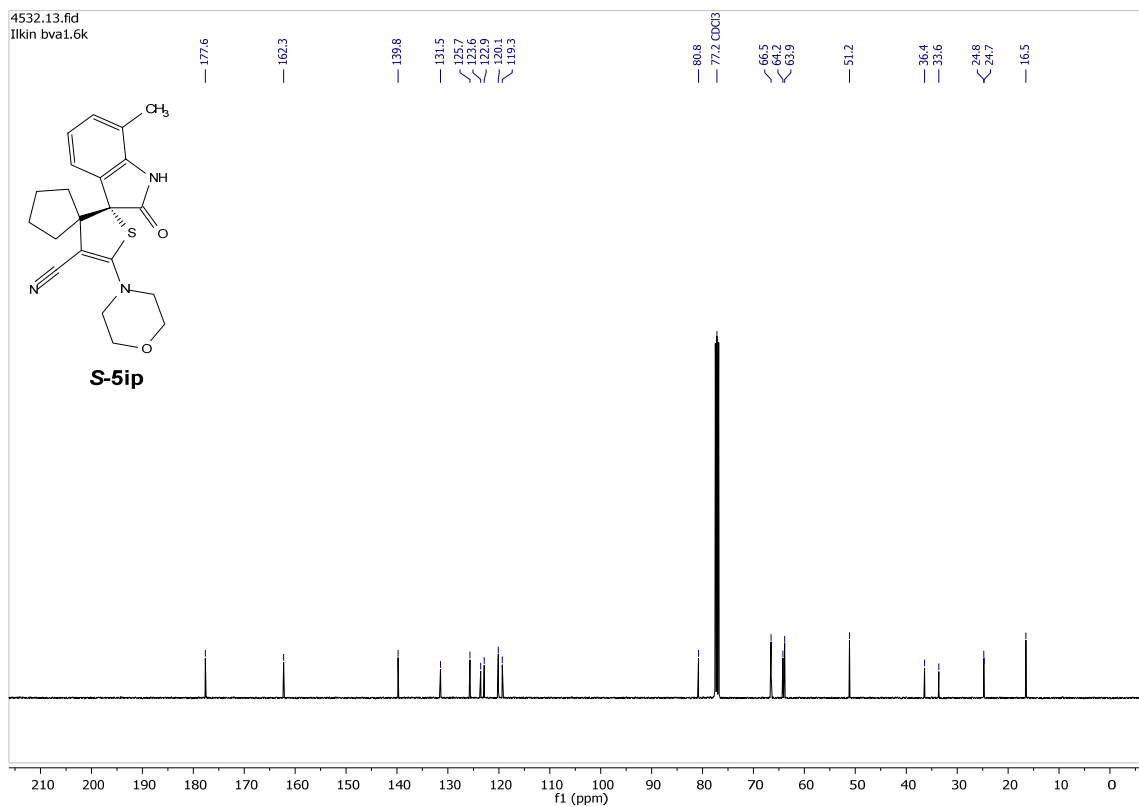

$^{13}\text{C}$  NMR (100 MHz,  $\text{CDCl}_3-d$ ) of **(S)-5ip**

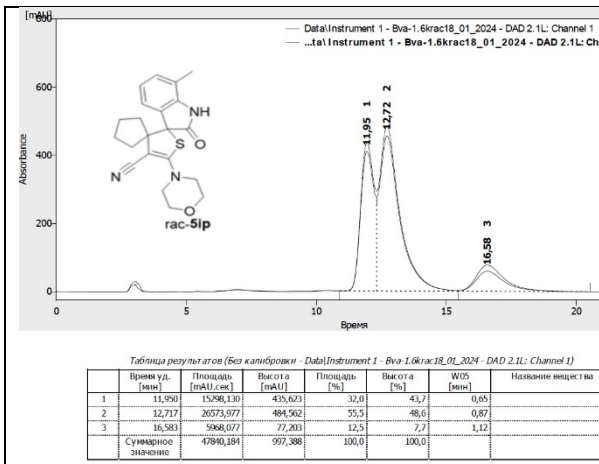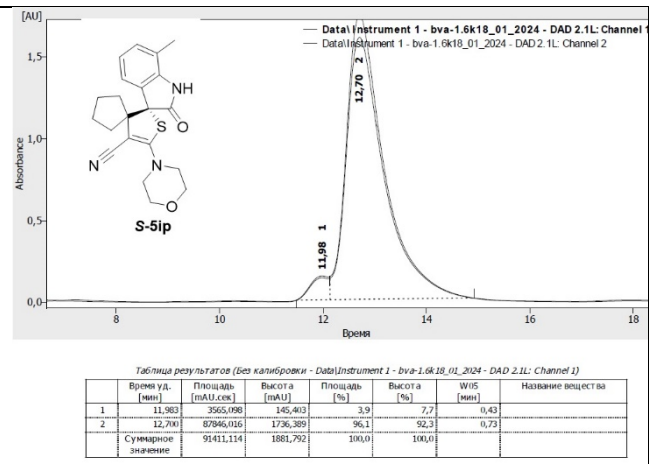

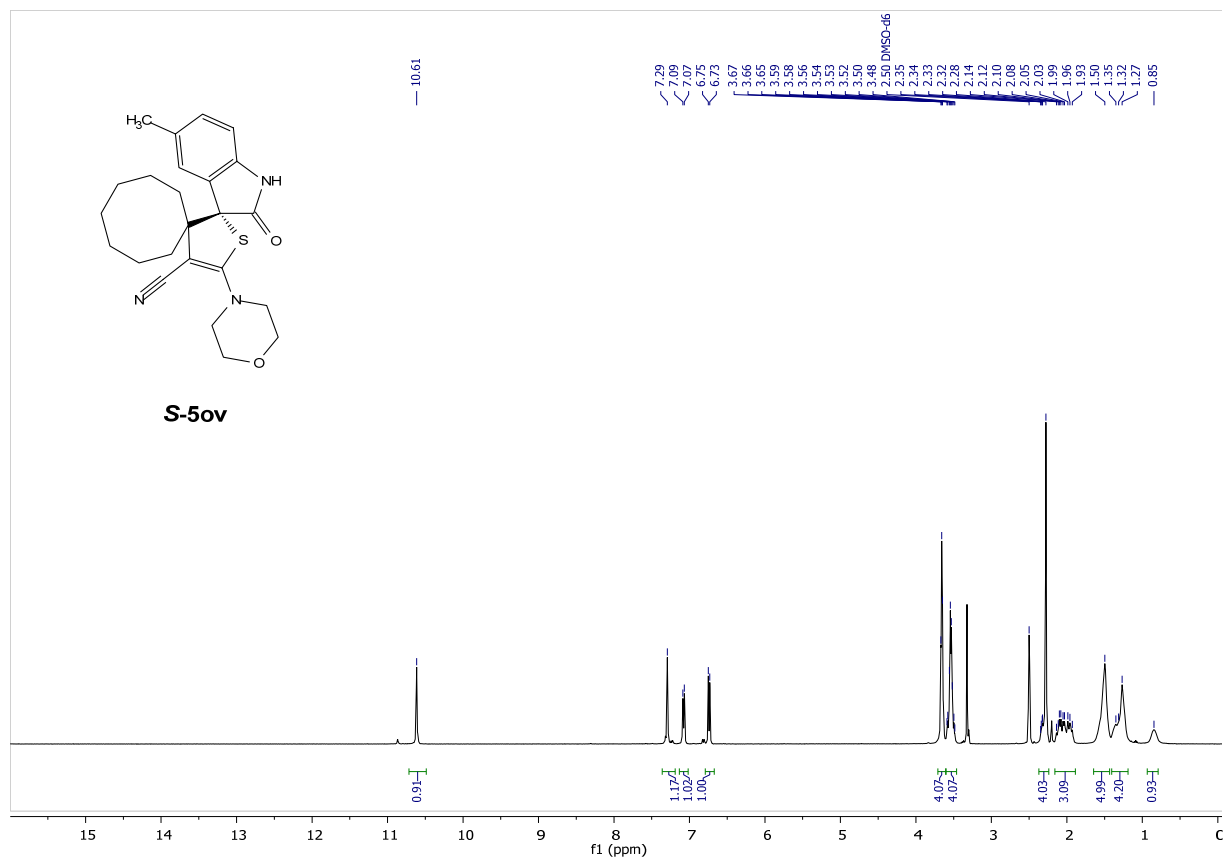

<sup>1</sup>H NMR (400 MHz, DMSO-*d*<sub>6</sub>) of (S)-5ov

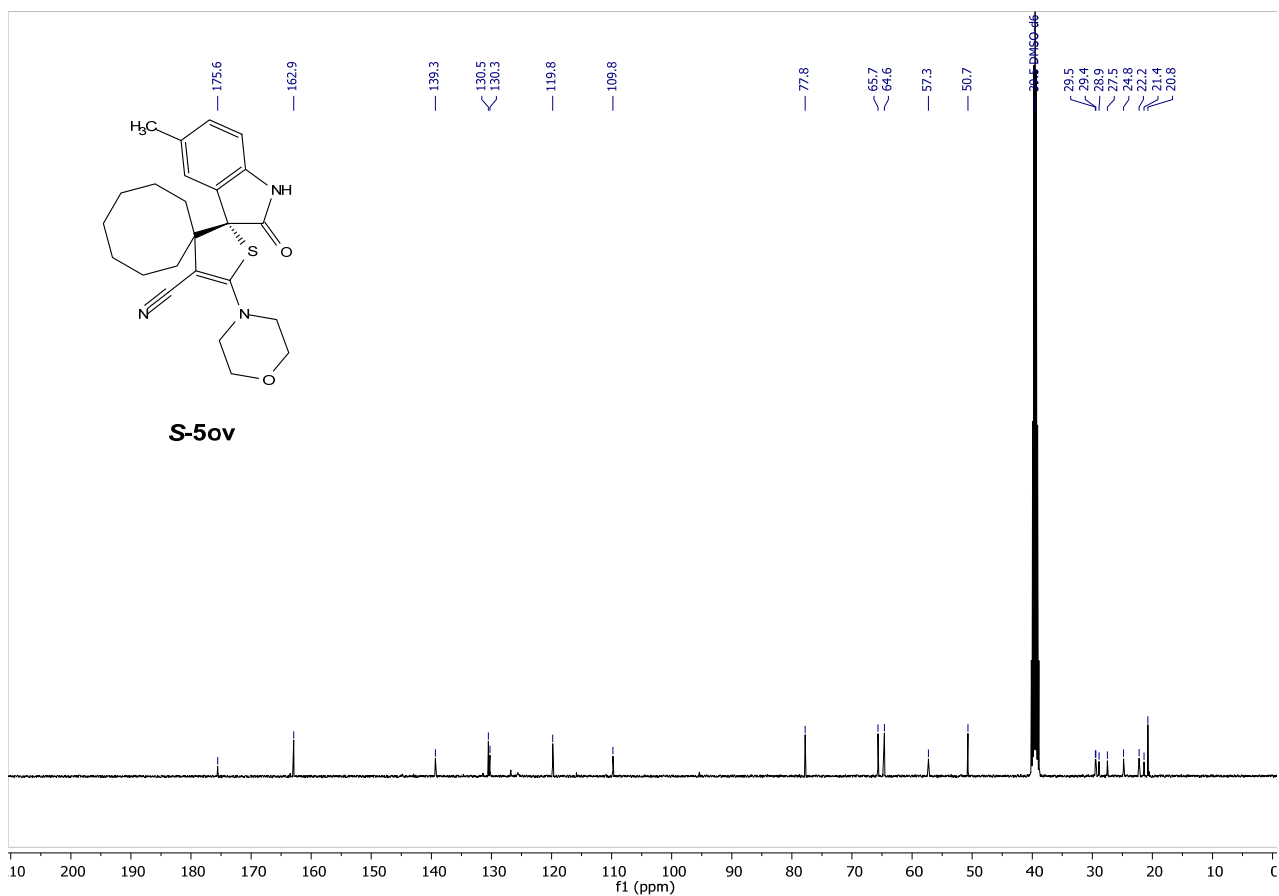

<sup>13</sup>C {<sup>1</sup>H} NMR (100 MHz, DMSO-*d*<sub>6</sub>) of (S)-5ov

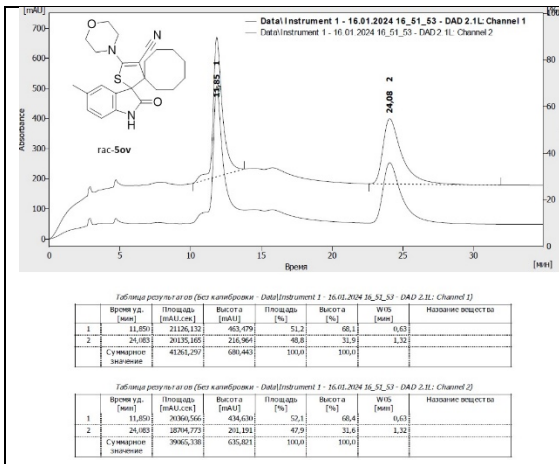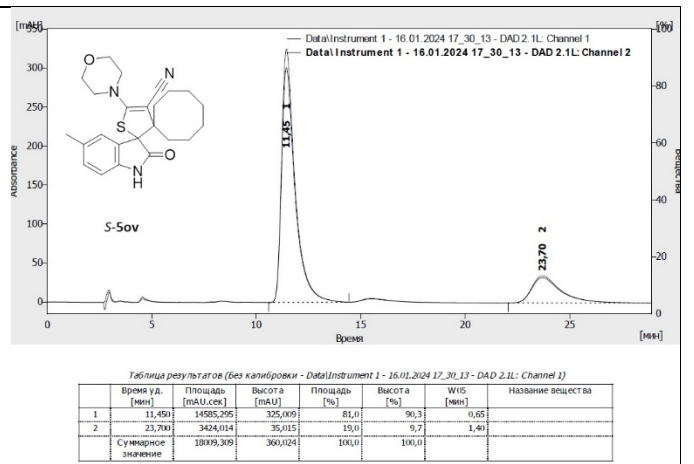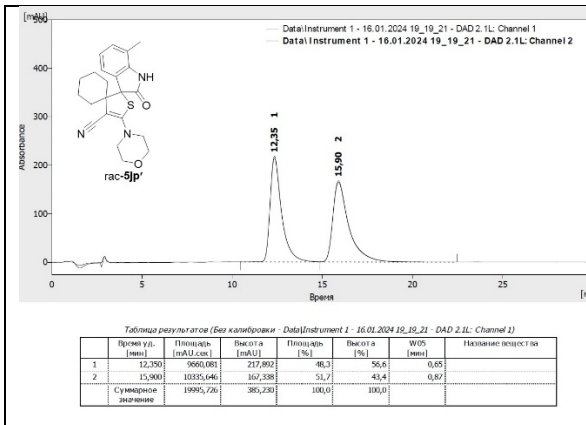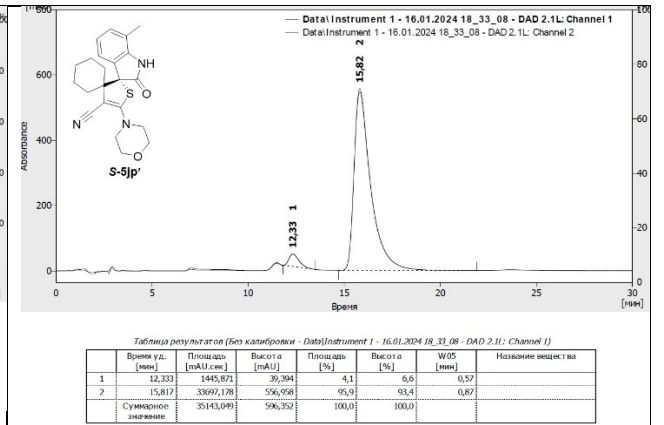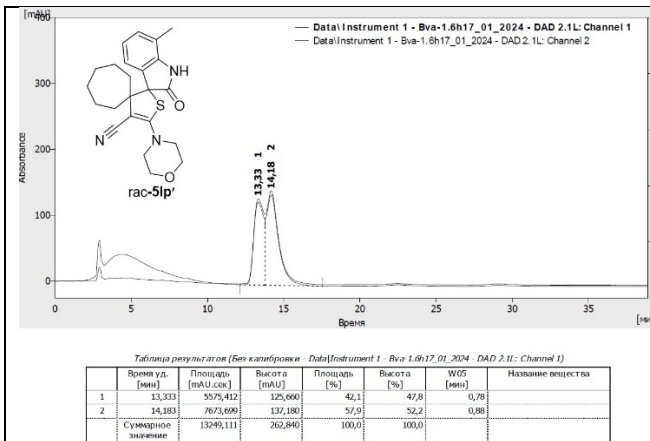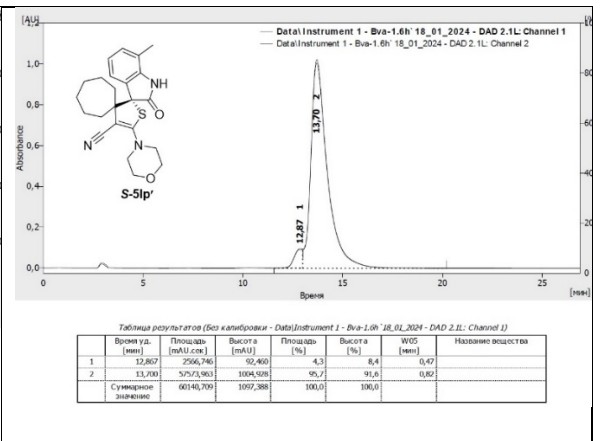



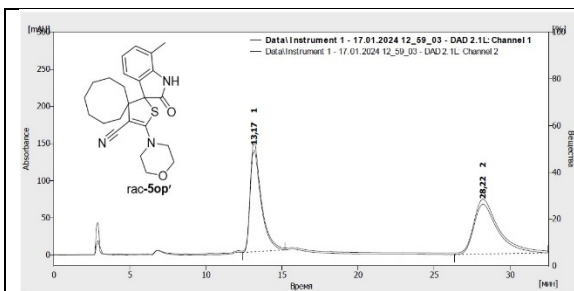

Таблица результатов (без калибровки) - Data\Instrument 1 - 17.01.2024 12\_59\_03 - DAD 2.1L: Channel 1

| Время удерживания [мин] | Площадь [mAU.сек] | Высота [mAU] | Площадь [%] | Высота [%] | W05 [мин] | Название вещества |
|-------------------------|-------------------|--------------|-------------|------------|-----------|-------------------|
| 1                       | 13,167            | 6615,734     | 13,132      | 48,1       | 0,75      |                   |
| 2                       | 28,217            | 7361,863     | 67,141      | 51,9       | 32,9      | 1,60              |
| Суммарное значение      | 14177,597         | 204,287      | 100,0       | 100,0      |           |                   |

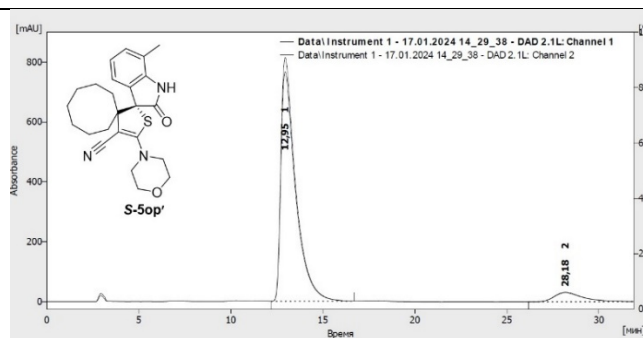

Таблица результатов (без калибровки) - Data\Instrument 1 - 17.01.2024 14\_29\_38 - DAD 2.1L: Channel 1

| Время удерживания [мин] | Площадь [mAU.сек] | Высота [mAU] | Площадь [%] | Высота [%] | W05 [мин] | Название вещества |
|-------------------------|-------------------|--------------|-------------|------------|-----------|-------------------|
| 1                       | 12,950            | 42499,829    | 760,442     | 93,0       | 96,2      | 0,80              |
| 2                       | 28,183            | 3210,571     | 29,885      | 7,0        | 3,8       | 1,60              |
| Суммарное значение      | 45710,400         | 796,328      | 100,0       | 100,0      |           |                   |
